# Supplementary material for: Dietary Concentrate-to-Forage Ratio Affects Rumen Bacterial Community Composition and Metabolome of Yaks
Source: Front Nutr. 2022 Jul 14;9:927206. doi: 10.3389/fnut.2022.927206 (PMC9329686; doi:10.3389/fnut.2022.927206)
Supplement: Supplementary Table 2 — List of identified metabolites. [file Table_2.XLSX]

## Sheet: C50vsC65
ID	Metab ID	Metabolite	Formula	Library ID	Retention time	M/Z	VIP_pred_OPLS-DA	FC(C65/C50)	P_value	FDR	mode	C50-1	C50-2	C50-3	C50-4	C50-5	C50-6	C65-1	C65-2	C65-3	C65-4	C65-5	C65-6
pos_61	metab_60	4-Hydroxyproline galactoside	C11H19NO8	HMDB0029354	0.794517	276.108	1.36456	0.928704	0.007706	0.02087	pos	7.138	7.2203	6.5995	6.7646	7.3879	6.8837	6.4454	6.6239	6.3949	6.357	6.6022	6.5773
pos_124	metab_123	Traumatic Acid	C12H20O4	LMFA01170002;HMDB0000933	5.86723	251.126	1.35821	0.933218	0.0001105	0.001552	pos	6.4923	6.3948	6.1392	6.2776	6.4323	6.2656	5.9281	5.9109	5.7912	5.824	6.0072	6.0068
pos_132	metab_131	Aflatoxin B1 dialcohol	C18H18O6	HMDB0011672	4.65353	353.1	1.19662	0.950501	7.875e-05	0.001401	pos	6.6479	6.6287	6.5499	6.5326	6.6402	6.5159	6.3434	6.2325	6.095	6.2308	6.3385	6.3175
pos_135	metab_134	Trans-Piceid	C20H22O8	HMDB0030564	4.40323	373.129	1.03607	0.945537	0.0009138	0.004631	pos	4.6322	4.8075	4.6054	4.5319	4.6352	4.55	4.3966	4.359	4.38	4.3618	4.4256	4.328
pos_198	metab_197	Pantothenic Acid	C9H17NO5	HMDB0000210	1.84915	220.118	1.38026	0.921138	0.006732	0.01892	pos	7.1414	6.8311	6.4002	6.4776	7.1159	6.739	6.0731	6.5124	6.0727	6.0799	6.3838	6.3718
pos_264	metab_263	Glutathione episulfonium ion	C12H20N3O6S+	HMDB0060479	3.5136	317.102	1.7788	0.834243	0.004141	0.01331	pos	5.6258	5.0244	4.7716	4.8338	5.7279	4.7818	4.353	4.4267	3.6057	4.2856	4.5518	4.4462
pos_281	metab_280	()7-epi Jasmonic Acid	C12H18O3	-	3.75692	211.133	1.08177	0.94456	0.01244	0.02959	pos	6.1195	6.4748	5.9264	6.3048	6.4672	6.1538	5.9034	6.041	5.6658	5.7005	6.0324	6.0292
pos_284	metab_283	Arlatin	C15H22O4	HMDB0035740	4.44882	267.159	1.22636	0.92201	0.003095	0.01083	pos	5.1314	5.4715	4.9029	5.2234	5.3185	5.113	4.8509	4.9116	4.5232	4.6462	4.8887	4.9092
pos_318	metab_317	Cucurbic acid	C12H20O3	HMDB0029388	6.0101	195.138	1.00311	0.958144	0.000373	0.002726	pos	5.7245	5.8553	5.6479	5.6662	5.8279	5.6842	5.5214	5.4979	5.3992	5.4519	5.5576	5.5366
pos_356	metab_355	AMC Arachidonoyl Amide	C30H39NO3	-	7.03067	484.281	1.51988	0.838116	0.04157	0.07466	pos	4.7956	4.5825	4.8006	5.6317	4.7204	5.1552	2.9812	5.0353	4.0466	3.8948	4.6435	4.2829
pos_485	metab_484	PGF1alpha Alcohol	C20H38O4	-	6.20472	365.267	1.51859	0.913428	0.0003772	0.002739	pos	6.5486	6.3814	6.2671	6.0207	6.5226	6.2382	5.8071	5.8204	5.6495	5.6386	5.8882	5.8906
pos_498	metab_497	(E)-3,7-Dimethyl-2,6-octadienyl heptanoate	C17H30O2	LMFA07010619	6.1523	249.221	1.28795	0.930812	0.0002145	0.002078	pos	5.857	5.8307	5.7647	5.6192	5.675	5.6833	5.2948	5.3958	5.0919	5.3779	5.4476	5.4371
pos_516	metab_515	7,10-Hexadecadiynoic acid	C16H24O2	LMFA01030492	6.05507	249.185	1.18513	0.941744	0.001305	0.005889	pos	6.1719	6.3875	6.0935	6.0546	6.4283	6.1474	5.9208	5.8868	5.6292	5.8271	5.9461	5.9034
pos_528	metab_527	(3E,6Z)-Nonadien-1-yl acetate	C11H18O2	HMDB0038068	5.86723	147.117	1.0801	0.953114	0.0003375	0.0026	pos	5.8676	5.8633	5.6562	5.7121	5.8645	5.7177	5.5303	5.5135	5.4323	5.4652	5.5609	5.5546
pos_739	metab_738	4-Methyl-5-thiazoleethanol	C6H9NOS	-	1.47553	144.048	1.24952	0.929356	0.01328	0.03098	pos	6.5225	6.0632	5.9001	6.1788	6.7009	6.3461	5.7135	5.6457	5.7369	5.848	6.0605	6.0406
pos_780	metab_779	L-prolyl-L-proline	C10H16N2O3	HMDB0011180	1.72502	195.113	1.14021	0.934151	0.003917	0.01282	pos	5.3255	5.5494	5.0186	5.3085	5.4151	5.1828	5.0102	5.1058	4.7859	4.8456	4.9678	4.9904
pos_806	metab_805	4-(2-Aminophenyl)-2,4-dioxobutanoic acid	C10H9NO4	HMDB0000978	1.9175	190.05	1.11656	0.92408	0.007707	0.02087	pos	4.6162	4.8065	4.3691	4.7755	4.8834	4.6039	4.4102	4.377	4.0064	4.1975	4.4787	4.4571
pos_913	metab_912	L-phenylalanyl-L-hydroxyproline	C14H18N2O4	HMDB0011176	2.507	311.161	1.05414	0.948615	0.00717	0.01979	pos	5.9857	6.224	5.7537	6.0138	6.149	5.836	5.7469	5.8209	5.5088	5.559	5.7359	5.7438
pos_921	metab_920	Hydroxyprolyl-Alanine	C8H14N2O4	HMDB0028856	2.56137	167.082	1.16416	0.926331	0.00536	0.01597	pos	4.7786	5.0359	4.5767	4.8639	5.1099	4.7105	4.534	4.57	4.3551	4.3485	4.5738	4.5506
pos_935	metab_934	3R-aminononanoic acid	C9H19NO2	LMFA01100019	2.65393	174.149	1.37432	0.923531	0.0003604	0.002685	pos	5.9666	6.0455	5.7226	5.8723	6.1307	5.8079	5.4964	5.5769	5.351	5.2381	5.5869	5.5767
pos_984	metab_983	2-Hydroxy-3-methylbenzalpyruvate	C11H10O4	-	2.9557	207.066	1.06838	0.940425	0.0006916	0.003916	pos	4.8651	4.9643	4.7696	4.7467	4.9853	4.7762	4.6656	4.6209	4.3925	4.483	4.6123	4.5997
pos_990	metab_989	8-Hydroxy-5,6-octadienoic acid	C8H12O3	LMFA01031076;HMDB0031101	3.02548	313.163	1.1729	0.928058	0.0006936	0.003922	pos	4.7886	4.7483	4.5707	4.7473	4.8578	4.6428	4.4416	4.5087	4.2222	4.214	4.4908	4.4389
pos_1051	metab_1050	Muscomin	C18H18O7	HMDB0037250	3.5136	369.095	1.7727	0.828834	0.005828	0.01698	pos	5.457	4.7639	4.4132	4.6136	5.5055	4.5851	3.8591	4.2067	3.6248	3.895	4.4293	4.3018
pos_1052	metab_1051	2E,4E,8Z,10E-dodecatetraenoic acid	C12H16O2	LMFA01030240	3.52118	193.123	1.04119	0.944123	0.01147	0.02784	pos	5.6893	5.9942	5.4005	5.8267	5.716	5.6244	5.4875	5.5106	5.2221	5.1761	5.467	5.4743
pos_1078	metab_1077	3-Phenylpropyl formate	C10H12O2	HMDB0034471	3.77203	165.091	1.15297	0.935395	0.003815	0.0126	pos	5.3654	5.6558	5.203	5.4986	5.6774	5.3843	5.1562	5.1933	4.9727	4.9239	5.2094	5.2086
pos_1164	metab_1163	6,11-Dihydroxy-2,2-dimethylpyrano[3,2-c]xanthen-7(2H)-one	C18H14O5	HMDB0040357	4.69127	311.092	1.34061	0.927282	0.0001045	0.001517	pos	5.7993	5.8863	5.6831	5.6932	5.8437	5.6655	5.4505	5.3757	5.1358	5.2398	5.4148	5.4429
pos_1167	metab_1166	8-Acetylegelolide	C16H20O6	HMDB0037772	4.72155	341.158	1.58676	0.890017	0.0001901	0.001967	pos	5.2487	5.4917	5.2165	5.2691	5.4272	5.2609	4.8126	4.7009	4.4427	4.5995	4.9138	4.9359
pos_1176	metab_1175	Corchorifatty acid A	C18H28O4	HMDB0032664	4.81267	291.196	1.30008	0.915481	0.0001187	0.001609	pos	4.586	4.8179	4.5196	4.6228	4.7337	4.5507	4.2741	4.2478	4.0846	4.1599	4.3392	4.3703
pos_1193	metab_1192	C12:4n-2,4,8,10	C12H16O2	LMFA01030240	4.9485	193.123	1.33398	0.92413	8.354e-05	0.001425	pos	5.3581	5.5473	5.296	5.3661	5.551	5.3078	5.0297	5.0303	4.8552	4.8637	5.1035	5.0802
pos_1230	metab_1229	3alpha,4,5,7alpha-Tetrahydro-5-hydroxy-1H-isoindole-1,3(2H)-dione	C8H9NO3	HMDB0034887	5.3741	335.124	1.53496	0.901878	2.45e-05	0.0009209	pos	5.381	5.6292	5.3245	5.399	5.5358	5.3244	4.9351	4.9586	4.7309	4.747	5.003	5.0184
pos_1345	metab_1344	8,11-Octadecadiynoic acid	C18H28O2	LMFA01030537	6.14482	277.216	1.0183	0.960709	0.001184	0.005499	pos	6.8129	6.8805	6.7036	6.6444	6.8708	6.7055	6.508	6.5387	6.301	6.5012	6.5929	6.5826
pos_1351	metab_1350	12S-HHT	C17H28O3	HMDB0012535	6.15977	313.237	1.32716	0.934431	0.0001893	0.001966	pos	6.4495	6.4853	6.3459	6.2226	6.4368	6.3079	5.9028	6.0143	5.7196	5.9407	6.0844	6.0821
pos_1364	metab_1363	F4-Neuroprostane (4-series)	C22H34O5	-	6.19722	379.246	1.31729	0.931423	0.0002946	0.002416	pos	6.0498	6.2353	5.9758	5.8488	6.17	5.9419	5.6573	5.6129	5.4381	5.6032	5.7174	5.7106
pos_1899	metab_1898	Acylated phloroglucinol	C24H38O5	-	6.27195	407.277	1.41788	0.921872	4.54e-05	0.001105	pos	6.0998	5.804	6.0854	5.9988	6.0523	5.9804	5.5576	5.6015	5.3103	5.47	5.6231	5.6428
pos_1956	metab_1955	Trans,trans-Farnesol	C15H26O	-	6.15977	223.206	1.33649	0.928584	2.266e-05	0.0008991	pos	5.6153	5.7266	5.5043	5.5262	5.6656	5.4824	5.2306	5.1768	5.074	5.1013	5.2844	5.26
pos_1962	metab_1961	2-Hydroxy-2,6,6-trimethylcyclohexanone	C9H16O2	HMDB0037023	6.1523	330.264	1.37793	0.925256	9.076e-05	0.001461	pos	6.0845	6.0621	6.0131	5.8621	5.8632	5.9151	5.4653	5.5878	5.2886	5.5117	5.6412	5.6327
pos_1966	metab_1965	(S)-(-)-Perillyl alcohol	C10H16O	-	6.1523	305.248	1.16734	0.947621	0.0001607	0.001827	pos	6.0755	6.1691	5.957	5.9487	6.1724	5.9896	5.7681	5.7346	5.628	5.6864	5.7985	5.7964
pos_1968	metab_1967	6,9,12-hexadecatrienoic acid	C16H26O2	LMFA01030136;LMFA01031092	6.1523	251.201	1.07991	0.953561	0.0003736	0.002726	pos	6.1365	6.2291	5.9915	6.0045	6.1732	6.0284	5.836	5.8079	5.6465	5.8286	5.8771	5.8714
pos_2012	metab_2011	13E-octadecene-9,11-diynoic acid	C18H26O2	LMFA01030556	6.09993	275.201	1.14782	0.954996	0.0003361	0.002595	pos	7.0669	7.2211	6.9686	6.9859	7.1623	6.9899	6.7766	6.7581	6.5639	6.7135	6.843	6.8313
pos_2085	metab_2084	Confertifoline	C15H22O2	-	6.0026	235.169	1.19884	0.945219	0.0001397	0.001726	pos	6.0885	6.2394	5.9956	6.0192	6.2151	6.023	5.7881	5.7768	5.6346	5.7158	5.834	5.8263
pos_2093	metab_2092	2-Benzylidene-1-heptanol	C14H20O	HMDB0036170	5.9951	205.159	1.38159	0.920895	3.207e-05	0.0009917	pos	5.4991	5.6658	5.3852	5.4167	5.5972	5.4278	5.0956	5.0652	4.8979	5.021	5.1713	5.1328
pos_2104	metab_2103	1,4'-Bipiperidine-1'-carboxylic acid	C11H20N2O2	HMDB0060336	5.91988	213.16	1.33537	0.896967	0.0315	0.06031	pos	5.3336	5.1463	4.8379	4.7985	5.9296	4.8177	4.673	4.6583	4.4562	4.5684	4.6545	4.6757
pos_2135	metab_2134	1-H-Inden-1-one,2,3-dihydro-3,3,5,6-tetramethyl	C13H16O	HMDB0059683	5.70062	189.128	1.19902	0.93129	0.000307	0.002456	pos	4.9796	5.0841	4.9135	4.8976	5.1807	4.8977	4.682	4.683	4.52	4.5271	4.7479	4.736
pos_2166	metab_2165	6,10-Dimethyl-5(E),9-undecadien-2-one	C13H22O	LMFA11000696	4.80508	177.164	1.82252	0.848779	3.518e-05	0.001022	pos	5.0392	4.9505	4.842	4.7163	5.2921	4.8758	4.2757	4.1328	4.0968	4.0191	4.3485	4.3528
pos_2169	metab_2168	3-(Hydroxymethyl)-2-octanone	C9H18O2	LMFA05000624;HMDB0037164	4.68373	197.096	1.18907	0.932217	0.0001189	0.001609	pos	4.8935	4.9148	4.7829	4.6977	4.9656	4.7771	4.5643	4.4707	4.3997	4.478	4.5723	4.5804
pos_2190	metab_2189	C.I. Natural Red 20	C16H16O5	HMDB0030579	4.31963	271.097	1.01048	0.953102	0.001378	0.006113	pos	5.4993	5.5601	5.4611	5.3932	5.5362	5.4297	5.2845	5.2327	5.0191	5.1742	5.3132	5.3158
pos_2198	metab_2197	Jasmolone	C11H16O2	HMDB0030039	3.75692	163.112	1.20068	0.933552	0.002973	0.01052	pos	5.7781	6.0417	5.5395	5.8475	5.8594	5.6972	5.4468	5.5381	5.1454	5.2418	5.534	5.5463
pos_2203	metab_2202	3-Formyl-4,6-dihydroxy-2-methoxy-5-methylchalcone	C18H16O5	LMPK12120427	3.5136	313.107	1.15763	0.942168	0.0003504	0.002651	pos	5.3718	5.1666	5.2395	5.2231	5.2801	5.0501	4.9282	4.8702	4.8233	4.9317	5.0089	4.9576
pos_2324	metab_2323	(5S,6S)-6-Amino-5-hydroxycyclohexane-1,3-diene-1-carboxyate	C7H9NO3	-	0.75	156.066	1.0403	0.955774	9.525e-05	0.001478	pos	5.6593	5.8016	5.6642	5.711	5.7335	5.62	5.4916	5.4828	5.3095	5.4113	5.4892	5.491
pos_2433	metab_2432	5'-Deoxyadenosine	C10H13N5O3	HMDB0001983	1.0353	252.109	1.4249	0.914699	0.0158	0.03522	pos	7.3692	7.2403	6.7368	6.4961	7.6615	7.1912	6.5473	6.3786	6.2302	6.4627	6.7194	6.7183
pos_2680	metab_2679	Dihydrozeatin	C10H15N5O	HMDB0012215	0.646483	222.134	1.19157	0.937152	0.0003128	0.002486	pos	5.4403	5.4128	5.3099	5.3963	5.5112	5.2925	5.1513	5.1212	4.8523	4.9647	5.1303	5.1127
pos_2715	metab_2714	L-3-Cyanoalanine	C4H6N2O2	HMDB0060245	0.683517	97.0402	1.19526	0.923212	0.0004112	0.002863	pos	4.59	4.749	4.5641	4.4252	4.6647	4.4313	4.2	4.4019	4.1963	4.127	4.1534	4.2422
pos_2828	metab_2827	Isonicotinic acid	C6H5NO2	HMDB0060665	0.779817	124.039	1.03649	0.957059	0.0107	0.02648	pos	7.7472	7.494	7.289	7.2837	7.5118	7.3836	6.9863	7.3537	6.9251	7.0091	7.2556	7.2624
pos_2913	metab_2912	Thymine	C5H6N2O2	HMDB0000262	0.9375	127.05	1.28064	0.919549	0.01946	0.04146	pos	6.611	6.41	6.049	5.8732	6.9181	6.4707	5.8492	5.979	5.5933	5.7375	6.0458	6.0425
pos_2993	metab_2992	Furocoumarinic acid glucoside	C17H18O9	HMDB0029601	1.12552	430.113	1.74975	0.810098	0.009661	0.0245	pos	5.1768	5.1312	4.2966	4.1691	5.3587	4.7427	3.7254	4.208	3.0348	3.7961	4.3911	4.2402
pos_3023	metab_3022	N-Fructosyl isoleucine	C12H23NO7	-	1.18588	294.155	2.24127	0.732971	0.003538	0.01194	pos	5.4092	4.6399	4.617	4.6546	5.5983	4.853	3.0188	4.3262	3.373	2.7368	4.0806	4.2853
pos_3041	metab_3040	Undecanedioic acid	C11H20O4	LMFA01170007;HMDB0000888	1.23882	234.17	1.29267	0.911484	0.002883	0.0103	pos	4.7527	4.8342	4.4578	4.548	5.0193	4.6529	4.1898	4.3381	4.2172	4.3168	4.3622	4.3429
pos_3114	metab_3113	Isoglobotriaose	C19H34O15	HMDB0006598	1.44502	525.184	1.46536	0.891833	0.002576	0.009513	pos	5.6549	5.7669	5.2899	5.1435	5.5676	5.4167	5.0843	4.9962	4.3511	4.8182	4.9987	5.0383
pos_3125	metab_3124	N-(1-Deoxy-1-fructosyl)leucine	C12H23NO7	HMDB0037840	1.46792	294.155	1.95525	0.794276	0.001466	0.006391	pos	5.1021	4.3918	4.2678	4.3819	5.2695	4.4679	3.5247	3.9524	3.6866	3.2051	3.8085	3.9665
pos_3179	metab_3178	Agavoside A	C33H52O9	LMST01080006;HMDB0034391	1.57395	308.177	2.81301	0.541826	0.0005829	0.003539	pos	3.4054	5.1979	4.4683	3.9026	5.2061	4.575	3.7003	2.0319	1.9086	1.9675	2.0411	2.8483
pos_3198	metab_3197	Sarmentosin	C11H17NO7	HMDB0030697	1.61983	298.09	1.42421	0.878965	0.007727	0.02091	pos	5.1782	5.1547	4.5514	4.5545	5.2876	4.9681	4.0982	4.7131	4.0043	4.1509	4.5491	4.585
pos_3208	metab_3207	3-hydroxyphenylpropionylglycine	C11H13NO4	HMDB0094724	1.64225	256.118	1.41564	0.900598	0.0008377	0.004399	pos	5.2412	5.477	4.9595	5.0747	5.2674	5.066	4.873	4.8001	4.3446	4.537	4.742	4.6966
pos_3272	metab_3271	Alkaloid AQC2	C19H22N2O3	HMDB0038595	1.74023	344.197	2.23763	0.754577	0.002819	0.01013	pos	5.625	5.5434	4.6726	4.6055	6.1968	4.8187	4.1985	4.3059	3.6335	3.502	3.9764	4.1254
pos_3277	metab_3276	Osmaronin	C11H17NO6	HMDB0032769	1.74783	292.139	1.47441	0.81465	0.0231	0.0473	pos	4.0967	3.6824	3.3856	3.5354	4.4554	3.701	3.1748	3.1614	2.1036	3.4204	3.3754	3.3836
pos_3316	metab_3315	Epidermin	C11H19NO6	HMDB0034777	1.85673	226.108	1.00281	0.955697	0.01259	0.02984	pos	6.8743	7.1855	6.6228	6.9071	7.0419	6.8095	6.7241	6.7493	6.3524	6.5091	6.6453	6.6236
pos_3417	metab_3416	Isopropylpyrazine	C7H10N2	HMDB0041570	2.0095	123.092	1.63277	1.15033	0.002965	0.0105	pos	4.4677	4.5499	5.2847	4.9541	5.0489	5.1934	5.5355	5.3044	6.1124	5.3325	5.8108	5.8321
pos_3419	metab_3418	N6-Acetyl-5S-hydroxy-L-lysine	C8H16N2O4	HMDB0033891	2.0095	169.097	1.68846	1.14145	0.002548	0.009435	pos	5.0152	5.1797	5.9065	5.5792	5.5049	5.8161	6.1623	5.9181	6.7405	5.9478	6.439	6.4574
pos_3530	metab_3529	Gamma-Glu-Leu	C11H20N2O5	-	2.20363	261.145	1.38107	0.905164	0.01088	0.02678	pos	5.9537	6.1012	5.5884	5.2364	6.1918	5.7898	5.122	5.2704	5.0209	5.1426	5.492	5.5058
pos_3553	metab_3552	Phenylalanyl-Threonine	C13H18N2O4	HMDB0029005	2.23383	249.123	1.35711	0.862896	0.01735	0.03785	pos	3.7856	4.7429	4.0236	4.7567	4.1643	4.3009	3.9748	3.7351	3.101	3.717	3.9357	3.778
pos_3559	metab_3558	Ethyl 3-hydroxydodecanoate	C14H28O3	HMDB0059850	2.24875	283.166	1.14435	0.917888	0.01673	0.03684	pos	5.0463	5.3705	4.605	4.9643	5.113	4.7847	4.6452	4.8755	4.2153	4.4438	4.6591	4.5915
pos_3585	metab_3584	Kainic acid	C10H15NO4	-	2.31113	214.107	1.29013	0.913205	0.01303	0.03058	pos	5.2691	5.2583	4.947	4.8983	5.5928	4.7969	4.6778	4.7458	4.5708	4.5322	4.7767	4.7867
pos_3667	metab_3666	Asparaginyl-Isoleucine	C10H19N3O4	HMDB0028734	2.43875	228.135	1.74393	0.777524	0.01234	0.02941	pos	4.206	3.987	3.3253	3.4855	4.9222	3.6728	3.0229	3.4381	2.8062	2.688	3.0335	3.3583
pos_3688	metab_3687	Anisole	C7H8O	HMDB0033895	2.49182	109.065	1.11787	0.936372	0.0003071	0.002456	pos	4.5482	4.6216	4.4077	4.5508	4.6761	4.4447	4.2989	4.249	4.182	4.1671	4.306	4.3161
pos_3708	metab_3707	11-bromo-undecanoic acid	C11H21BrO2	LMFA01090005	2.51575	265.082	1.09139	0.923468	0.01385	0.03193	pos	4.6125	4.9865	4.4225	4.8281	4.8556	4.594	4.4269	4.5421	4.0277	4.1587	4.4861	4.4946
pos_3881	metab_3880	Hexyl glucoside	C12H24O6	HMDB0031688	2.85552	306.192	1.26991	0.919739	0.0005816	0.003536	pos	4.8915	5.0316	4.7783	4.7891	5.1445	4.8175	4.5571	4.5265	4.3278	4.4195	4.6308	4.63
pos_3890	metab_3889	12-Oxo-2,3-dinor-10,15-phytodienoic acid	C16H24O3	HMDB0032090	2.88602	309.143	1.53005	0.836856	0.00315	0.01097	pos	3.904	4.0767	3.6071	3.7725	4.22	3.6971	3.1265	3.6825	3.036	3.0027	3.023	3.6127
pos_3923	metab_3922	Hydrocortamate	C27H41NO6	HMDB0014907	2.9328	440.277	1.64146	0.816335	0.0336	0.06332	pos	5.0689	4.6148	3.7078	4.7424	4.9318	4.4093	3.2139	3.7173	4.6992	3.1619	3.2361	4.4001
pos_3938	metab_3937	(3-Arylcarbonyl)-alanine	C10H11NO3	-	2.97092	194.082	1.14928	0.940507	0.002652	0.009711	pos	5.4573	5.533	5.4006	5.2274	5.6895	5.3701	5.1323	5.0175	5.0928	5.1396	5.1726	5.1752
pos_3954	metab_3953	N-butylformamide	C5H11NO	HMDB0062600	3.00147	140.047	1.09799	0.936668	0.0001223	0.001621	pos	4.3485	4.3683	4.3545	4.4423	4.3447	4.2903	4.1478	4.1009	3.9376	4.0258	4.1468	4.1358
pos_4024	metab_4023	2,4-Octadiene	C8H14	HMDB0061900	3.16227	152.144	2.38908	0.600386	0.005765	0.01685	pos	3.9073	3.6126	3.2424	2.6679	4.9563	3.37	2.1942	2.2071	2.0833	2.1425	2.2163	2.2166
pos_4040	metab_4039	Zanthodioline	C16H19NO5	HMDB0031929	3.19392	323.161	1.31812	0.92	1.679e-05	0.0008259	pos	4.751	4.9494	4.7252	4.7975	4.8675	4.7092	4.4292	4.4291	4.3508	4.3243	4.5076	4.4556
pos_4059	metab_4058	Tyrosyl-Tyrosine	C18H20N2O5	HMDB0029117	3.232	383.101	1.08224	1.08747	0.04208	0.07538	pos	4.3971	4.3906	5.0061	4.5017	4.8778	5.0211	5.1111	4.913	5.4994	4.6225	5.3138	5.1999
pos_4062	metab_4061	Valyl-Asparagine	C9H17N3O4	HMDB0029122	3.23962	214.119	2.86577	0.508711	0.003055	0.01073	pos	4.7785	4.2298	3.4998	2.8857	5.2775	3.4348	2.0619	2.0748	1.9513	2.0103	2.0839	2.0842
pos_4068	metab_4067	Cysteinyl-Gamma-glutamate	C8H15N3O4S	HMDB0028789	3.24723	313.096	1.93226	0.820323	0.0009645	0.004799	pos	5.2578	4.8664	4.7845	4.7595	5.6602	4.7238	4.035	4.3607	3.9082	3.8782	4.2456	4.2255
pos_4096	metab_4095	Histidinyl-Tyrosine	C15H18N4O4	HMDB0028897	3.30805	283.12	1.7262	0.807392	0.008558	0.02248	pos	4.4713	4.276	4.0043	3.8991	5.3156	4.1725	3.3863	3.7956	3.1586	3.1678	3.8021	3.7932
pos_4128	metab_4127	L,L-Cyclo(leucylprolyl)	C11H18N2O2	HMDB0034276	3.37652	211.144	1.08942	0.925638	0.0182	0.03932	pos	4.5774	4.782	4.2827	4.5029	5.0122	4.5968	4.2509	4.3049	4.1772	4.2302	4.3495	4.382
pos_4129	metab_4128	Glutaminylisoleucine	C11H21N3O4	HMDB0028800	3.37652	242.15	2.30238	0.619894	0.009314	0.02387	pos	4.2288	3.912	3.089	2.6177	4.7438	3.0002	2.2189	2.2319	2.108	2.1672	2.4182	2.2414
pos_4134	metab_4133	Triacanthine	C10H13N5	-	3.39173	204.125	1.1431	0.923844	0.008213	0.02186	pos	5.1139	5.031	4.6106	4.672	5.1314	4.9074	4.4515	4.6553	4.3686	4.3923	4.67	4.6844
pos_4166	metab_4165	3-Formyl-6-hydroxyindole	C9H7NO2	HMDB0031172	3.47548	162.055	1.24915	0.923	0.008587	0.02253	pos	6.1765	6.2492	5.5709	5.9917	6.0982	5.9109	5.4929	5.8415	5.1112	5.4741	5.6673	5.6391
pos_4174	metab_4173	3S-aminodecanoic acid	C10H21NO2	LMFA01100011	3.49837	188.165	1.19667	0.91548	0.001251	0.005716	pos	4.2871	4.3227	3.9905	4.1893	4.3881	4.094	3.8203	3.9534	3.7063	3.7255	3.9755	3.9563
pos_4197	metab_4196	D-Pantothenic acid	C9H17NO5	-	3.5668	184.097	1.26571	0.931295	0.0001482	0.001769	pos	5.3417	5.5731	5.3457	5.4356	5.536	5.3412	5.0636	5.0921	4.9373	4.9048	5.1567	5.1809
pos_4220	metab_4219	Trans-O-Methylgrandmarin	C16H18O6	HMDB0039031	3.6277	370.129	1.69396	0.83491	0.01021	0.02555	pos	4.543	4.907	4.8062	4.4313	4.7733	4.4531	3.8118	3.8698	4.3537	2.9729	4.0845	4.211
pos_4269	metab_4268	Trigoforin	C12H12O2	HMDB0029495	3.76447	189.091	1.23274	0.924947	0.001739	0.007186	pos	5.0973	5.3697	4.9505	5.1917	5.3922	5.0982	4.8703	4.8508	4.6448	4.5846	4.914	4.8995
pos_4291	metab_4290	()-Equol	C15H14O3	-	3.81762	243.102	1.03336	0.949051	0.0002621	0.002292	pos	4.7963	4.6488	4.614	4.7373	4.7512	4.6011	4.494	4.432	4.4062	4.4135	4.5061	4.4595
pos_4294	metab_4293	P-Acetaminobenzaldehyde	C9H9NO2	-	3.8328	164.071	1.23597	0.917164	0.0183	0.03948	pos	5.9857	5.951	5.3944	5.9809	6.0841	5.8035	5.3906	5.7789	4.8592	5.1359	5.5706	5.5516
pos_4324	metab_4323	Dihydroferulic acid 4-sulfate	C10H12O7S	HMDB0041724	3.94695	277.038	2.14393	0.721681	0.002577	0.009516	pos	5.0422	4.7697	3.9768	4.3058	4.7556	4.2693	2.9953	4.1608	2.6083	3.86	3.1562	2.7904
pos_4329	metab_4328	7alpha-hydroxy-3-oxochol-4-en-24-oic Acid	C24H36O4	HMDB0062744;LMST04010239	3.96213	411.25	1.46162	0.857819	0.03201	0.06108	pos	4.7219	4.5801	3.9931	4.5267	4.6437	4.1628	3.2942	3.8563	4.5186	3.1486	3.8456	4.1768
pos_4331	metab_4330	2'-Hydroxyfurano[2'',3'':4',3']chalcone	C17H12O3	LMPK12120002	3.96973	265.086	1.49623	0.899115	1.54e-05	0.0008078	pos	4.8442	4.9228	4.833	4.8327	4.9233	4.7838	4.3846	4.3684	4.1919	4.3045	4.4632	4.4877
pos_4348	metab_4347	7-hydroxygranisetron	C18H24N4O2	HMDB0061062	4.00017	346.223	1.12047	0.931657	0.00159	0.006757	pos	4.7075	4.8343	4.6768	4.5262	4.6567	4.5161	4.467	4.2709	4.1602	4.2218	4.4769	4.4156
pos_4369	metab_4368	C75	C14H22O4	-	4.06108	255.16	1.2762	0.916743	6.657e-05	0.001295	pos	4.3504	4.5238	4.2811	4.3754	4.4741	4.3019	4.0187	3.9587	3.9671	3.8981	4.1443	4.1253
pos_4418	metab_4417	Procurcumadiol	C15H22O3	HMDB0034721	4.1905	292.191	1.22934	0.924781	0.0003061	0.002453	pos	4.9327	5.0876	4.9188	4.7272	5.007	4.8386	4.6248	4.5701	4.3552	4.4952	4.6295	4.621
pos_4443	metab_4442	Karanjin	C18H12O4	LMPK12111542	4.25127	293.081	1.18487	0.928299	0.0008125	0.004321	pos	4.7948	4.7206	4.5915	4.6114	4.9454	4.6181	4.3939	4.4038	4.2655	4.2924	4.4866	4.413
pos_4493	metab_4492	11-amino-undecanoic acid	C11H23NO2	LMFA01100004	4.36523	202.18	1.25569	0.917396	0.0006534	0.003776	pos	4.7575	4.8051	4.494	4.5788	4.8791	4.5978	4.2997	4.3729	4.1071	4.2158	4.4132	4.3784
pos_4502	metab_4501	Sulindac sulfide	C20H17FO2S	HMDB0060614	4.39562	341.103	1.43875	0.854139	0.008823	0.02297	pos	3.8004	3.9674	3.7148	3.7294	3.8076	3.5215	3.5106	2.8174	3.433	3.1599	2.7946	3.5372
pos_4605	metab_4604	3,4-dihydroxy-1-methyl-4,5-diphenylpiperidine-2,6-dione	C18H17NO4	HMDB0134801	4.68373	294.113	1.17824	0.940129	0.0001745	0.001894	pos	5.5143	5.5285	5.3882	5.3309	5.5485	5.3584	5.1823	5.0648	4.9583	5.0979	5.1949	5.2166
pos_4614	metab_4613	5'-Deoxy-5-fluorocytidine	C9H12FN3O4	HMDB0060405	4.69882	210.068	1.10251	0.936991	0.0001737	0.001892	pos	4.6364	4.5588	4.4933	4.4386	4.6466	4.4616	4.2983	4.225	4.1031	4.2737	4.3317	4.2854
pos_4621	metab_4620	4-(2,6,6-Trimethylcyclohexa-1,3-dienyl)but-3-en-2-one	C13H18O	-	4.71398	191.143	1.38118	0.905713	8.38e-05	0.001426	pos	4.6408	4.8033	4.5001	4.5913	4.8244	4.5786	4.1947	4.3261	4.1183	4.1187	4.295	4.2475
pos_4650	metab_4649	5-Phenyl-1-pentanol	C11H16O	HMDB0031624	4.7975	165.128	1.09761	0.932546	0.002537	0.009408	pos	4.6358	4.8182	4.4287	4.638	4.8263	4.5809	4.3714	4.4053	4.1924	4.2114	4.434	4.4337
pos_4657	metab_4656	1-Methoxypyrene-6,7-oxide	C17H12O2	-	4.82783	249.091	1.59984	0.908392	8.723e-06	0.0007203	pos	6.2616	6.3717	6.1793	6.1016	6.4069	6.1417	5.7597	5.6586	5.4997	5.5847	5.7581	5.7715
pos_4691	metab_4690	(2Z,8S,9Z)-2,9-Heptadecadiene-8-hydroxy-4,6-diyne-1-yl acetate	C19H26O3	HMDB0031038	4.9109	325.176	1.23615	0.927162	0.002605	0.009596	pos	5.5437	5.8763	5.3132	5.5753	5.6882	5.449	5.2627	5.3091	4.9124	5.0674	5.2459	5.2083
pos_4748	metab_4747	1,2-Anthracenediol	C14H10O2	-	5.03103	211.075	1.76183	0.845181	0.0009631	0.004797	pos	4.7571	4.9954	4.7485	4.6412	5.0469	4.7596	4.0092	4.1641	4.14	3.497	4.3312	4.3271
pos_4768	metab_4767	5-(3-methoxyphenyl)-4-(sulfooxy)pentanoic acid	C12H16O7S	HMDB0127785	5.0685	337.096	1.29359	0.923319	0.0001454	0.001754	pos	5.2	5.1088	5.043	5.2121	4.9532	4.9959	4.8055	4.6483	4.513	4.6284	4.8132	4.7666
pos_4803	metab_4802	Zileuton O-glucuronide	C17H20N2O8S	HMDB0060914	5.1758	430.129	1.26377	0.933525	0.0005877	0.003552	pos	5.8764	6.0337	5.8308	5.8611	6.0104	5.8607	5.6081	5.621	5.2626	5.4031	5.5856	5.6353
pos_4843	metab_4842	Alpha-Santonin	C15H18O3	LMPR0103190001	5.29058	247.133	1.25671	0.888235	0.007437	0.02033	pos	3.9611	4.0628	4.4894	3.868	4.1397	3.9606	3.6948	3.6837	3.2774	3.3641	3.8638	3.8606
pos_4899	metab_4898	(S)-4-(4-Methylphenyl)-2-pentanone	C12H16O	HMDB0034177	5.50323	177.128	1.37709	0.901774	0.0001177	0.001604	pos	4.371	4.574	4.2563	4.357	4.5472	4.2833	4.0229	3.9614	3.8439	3.888	4.0573	4.0243
pos_4903	metab_4902	R1128B	C18H16O5	-	5.51842	313.107	1.16311	0.927914	0.0009843	0.004875	pos	4.8627	4.8377	4.622	4.5814	4.5191	4.6259	4.4277	4.2684	4.2254	4.3492	4.4464	4.3128
pos_4917	metab_4916	3-O-Methylniveusin A	C21H28O8	HMDB0039084	5.54878	426.213	3.26262	0.355607	9.264e-05	0.00147	pos	5.0286	3.5295	3.8482	3.1482	3.8475	4.0313	2.1443	0.8218	0.7183	0.7672	1.5051	2.3759
pos_4937	metab_4936	1-Hydroxyepiacorone	C15H24O3	HMDB0030918	5.61713	235.17	1.19243	0.928251	0.0001863	0.001954	pos	4.6537	4.8403	4.5681	4.6258	4.7887	4.6201	4.3605	4.3654	4.2065	4.2699	4.4348	4.4445
pos_4956	metab_4955	7S,8S-DiHOTrE	C18H30O4	LMFA02000226	5.66268	311.222	1.34605	0.927011	0.0003953	0.002805	pos	5.8698	6.1367	5.7239	5.816	6.0558	5.8269	5.336	5.5649	5.3964	5.4097	5.5769	5.5624
pos_4977	metab_4976	Estrone	C18H22O2	LMST02010004;HMDB0000145	5.72338	315.134	1.28874	0.86999	0.009734	0.02464	pos	3.7842	3.7969	4.2644	3.8241	3.9008	3.7816	3.6244	3.7078	2.8541	3.173	3.473	3.481
pos_5052	metab_5051	9,12-Octadecadiynoic Acid	C18H28O2	LMFA01030540	5.88225	277.216	1.16562	0.946335	0.0003388	0.002606	pos	6.1071	6.254	6.0134	6.0261	6.229	6.0396	5.796	5.7995	5.6058	5.7273	5.8981	5.8789
pos_5243	metab_5242	13,14-Dihydro-15-keto PGF2a	C20H34O5	HMDB0004685	6.09243	377.231	1.20854	0.94106	0.0003602	0.002684	pos	6.0818	6.2004	5.9146	5.931	6.1584	5.9524	5.7582	5.7284	5.4991	5.6101	5.7546	5.7542
pos_5246	metab_5245	16,16-dimethyl-6-keto Prostaglandin E1	C22H36O6	-	6.09243	397.257	1.22917	0.943865	0.0001559	0.001803	pos	6.3172	6.4514	6.1739	6.2526	6.4638	6.2834	6.0286	5.97	5.8521	5.8929	6.0558	6.0152
pos_5326	metab_5325	Pregn-4-en-20-one, 3b,17-dihydroxy-6a-methyl-	C22H34O3	-	6.18223	347.258	1.12861	0.94624	9.908e-05	0.001493	pos	5.6292	5.7364	5.6415	5.4993	5.5413	5.5489	5.3408	5.3154	5.1919	5.2045	5.3509	5.3859
pos_5346	metab_5345	Farnesyl acetone	C18H30O	-	6.20472	263.237	1.07304	0.93863	0.0251	0.05054	pos	5.5353	5.3149	5.3022	5.3023	5.9823	5.4156	5.1749	5.0262	5.1307	5.089	5.2148	5.197
pos_5355	metab_5354	(6b,7b,13R)-6,7-Diacetoxy-8,14-labdadiene-13-ol	C24H38O5	HMDB0035288	6.2122	448.303	1.84512	0.867921	1.403e-05	0.0007772	pos	5.9032	5.8821	5.8177	5.613	5.892	5.6459	5.1853	5.0829	4.7602	4.8395	5.1349	5.1596
pos_7171	metab_7170	Citranaxanthin	C33H44O	HMDB0036883	6.79695	495.303	1.08478	1.06897	0.03042	0.0587	pos	4.8801	4.6699	5.252	5.1268	4.566	5.1666	5.3609	5.3862	5.2236	5.1699	5.3041	5.2663
pos_7263	metab_7262	Phytal	C20H38O	HMDB0035654	6.71418	312.326	1.45337	1.17163	0.01611	0.03579	pos	3.348	3.1984	4.132	4.0699	3.2778	3.9291	4.1327	4.5707	4.0047	3.9511	4.5591	4.5011
pos_7813	metab_7812	Monoisobutyl phthalate	C12H14O4	-	6.30147	205.086	1.1136	1.07017	0.002075	0.008158	pos	4.448	4.2121	4.5823	4.5272	4.2814	4.4541	4.7602	4.6424	4.7056	4.775	4.7044	4.7822
pos_7947	metab_7946	(Z)-2,4-Dihydroxy-6-(8-pentadecenyl)benzoic acid	C22H34O4	HMDB0039226	6.2197	363.252	1.24075	0.937435	0.0001682	0.001867	pos	5.8274	5.8664	5.7331	5.6682	5.8214	5.7042	5.44	5.4475	5.2255	5.3104	5.5248	5.507
pos_7979	metab_7978	Dimorphecolic acid	C18H32O3	LMFA02000152	6.20472	297.242	1.22487	0.944824	0.0006325	0.003708	pos	6.7019	6.5485	6.4768	6.4503	6.8019	6.4939	6.226	6.2042	6.0457	6.1765	6.329	6.3146
pos_7997	metab_7996	8(S)-HETrE	C20H34O3	LMFA03050029	6.19722	305.248	1.2596	0.933032	3.354e-05	0.001007	pos	5.3297	5.4462	5.2404	5.1962	5.3528	5.239	4.9834	4.9025	4.8858	4.8883	4.9903	5.0252
pos_8018	metab_8017	4,12alpha-Dihydroxy-3-oxochol-4-en-24-oic Acid	C24H36O5	LMST04010434	6.18223	405.262	1.09335	0.95215	0.0002151	0.002078	pos	6.0258	6.124	5.9821	5.8505	5.9601	5.9183	5.7743	5.6691	5.6031	5.5946	5.7483	5.7536
pos_8082	metab_8081	(1(10)E,4a,5E)-1(10),5-Germacradiene-12-acetoxy-4,11-diol	C17H28O4	HMDB0038798	6.1523	261.185	1.2529	0.931257	8.444e-05	0.001429	pos	5.2807	5.4246	5.1658	5.2018	5.335	5.1871	4.9501	4.8869	4.7711	4.8145	5.0069	4.995
pos_8213	metab_8212	8-iso-16-cyclohexyl-tetranor Prostaglandin E2	C22H34O5	-	6.09243	379.246	1.28494	0.935975	0.0002724	0.002332	pos	6.1467	6.2354	5.9374	6.0076	6.2808	6.035	5.7726	5.7295	5.577	5.612	5.8071	5.7953
pos_8234	metab_8233	2,3-dinor-PGE1	C18H30O5	LMFA03010169	6.08497	327.217	1.36832	0.931933	0.0001696	0.001874	pos	6.3018	6.5149	6.1971	6.2581	6.4979	6.2199	5.9298	5.8776	5.7783	5.815	5.9938	6.014
pos_8242	metab_8241	Indole-3-carboxylic acid	C9H7NO2	HMDB0003320	6.08497	144.045	1.41044	0.870475	0.009052	0.02335	pos	4.2686	3.9305	4.1862	4.1755	4.9111	4.0507	3.8495	3.8207	3.4548	3.5511	3.7976	3.7473
pos_8275	metab_8274	2,4-Undecadiene-8,10-diynoic acid 2,3-dehydropiperidide	C16H17NO	HMDB0033525	6.07003	240.138	1.28549	1.11351	0.009116	0.02347	pos	4.1804	4.1101	3.9513	4.1762	4.2417	4.0769	4.3012	4.7159	4.1502	4.8469	4.7673	4.7641
pos_8286	metab_8285	6,9,12-Octadecatriynoic acid	C18H24O2	LMFA01030554	6.06255	273.185	1.0951	0.955233	0.0004097	0.002857	pos	6.5142	6.7214	6.4512	6.4868	6.6091	6.4888	6.3069	6.2552	6.0913	6.2002	6.3392	6.3201
pos_8288	metab_8287	3-Deoxyestrone	C18H22O	-	6.06255	255.174	1.16584	0.941198	0.0002087	0.002048	pos	5.4766	5.6868	5.4167	5.4527	5.5808	5.446	5.2447	5.1744	5.0264	5.1408	5.2551	5.2748
pos_8341	metab_8340	Alhpa-tocopheronic acid	C16H24O5	LMPR02020062	6.03262	297.168	1.20543	0.935458	1.384e-05	0.0007751	pos	4.9607	5.0258	4.8774	4.9429	5.0509	4.888	4.6398	4.5967	4.5554	4.6032	4.6741	4.7561
pos_8378	metab_8377	Demethoxyegonol	C18H16O4	HMDB0030772	6.01758	297.112	1.13625	0.943064	3.981e-05	0.001046	pos	5.2354	5.0777	5.1702	5.0693	5.0754	5.0393	4.859	4.7397	4.7245	4.8415	4.8709	4.8837
pos_8379	metab_8378	8-oxo-9,11-octadecadiynoic acid	C18H26O3	LMFA02000271	6.01758	291.196	1.20029	0.95172	0.0002303	0.002143	pos	7.051	7.2414	6.9374	7.0049	7.1573	6.9883	6.7649	6.7343	6.582	6.6496	6.8058	6.7982
pos_8476	metab_8475	Celastrol	C29H38O4	HMDB0002385	5.95748	451.281	1.02695	0.95053	0.008848	0.02299	pos	5.5338	5.9839	5.7195	5.564	5.6028	5.5569	5.4052	5.3192	5.4115	5.2992	5.4207	5.4241
pos_8557	metab_8556	C14:5n-1,3,5,7,9	C14H18O2	LMFA01030258	5.91235	219.138	1.37019	0.918573	1.96e-05	0.0008607	pos	5.1535	5.31	5.0579	5.1073	5.2506	5.0703	4.783	4.7167	4.6001	4.6839	4.8178	4.8258
pos_8659	metab_8658	Cinncassiol A	C20H30O7	HMDB0035164	5.81438	383.205	1.06988	0.952907	0.0003259	0.002552	pos	5.7915	5.8939	5.6453	5.8377	5.8735	5.7387	5.5432	5.538	5.3855	5.4761	5.5984	5.6027
pos_8702	metab_8701	Valyl-Valine	C10H20N2O3	HMDB0029140	5.75373	199.145	1.8201	0.701691	0.01995	0.04226	pos	2.9661	3.295	2.9458	2.9266	4.7755	2.9624	2.6575	2.268	1.8489	1.9078	2.6267	2.6341
pos_8749	metab_8748	3,5,6-trihydroxy-1-methyl-4,5-diphenylpiperidin-2-one	C18H19NO4	HMDB0134791	5.66268	346.165	1.10714	0.936937	0.005578	0.01644	pos	5.506	5.8374	5.2805	5.573	5.6711	5.4302	5.3219	5.4148	5.0984	5.1234	5.1585	5.0859
pos_8766	metab_8765	7-hydroxy Tetranor Iloprost	C18H26O5	-	5.63995	323.184	1.33702	0.917084	9.674e-05	0.001483	pos	5.0034	5.09	4.828	4.9822	5.1335	4.9215	4.643	4.5724	4.4109	4.469	4.6747	4.706
pos_8770	metab_8769	Cinncassiol C	C20H28O7	HMDB0035166	5.63237	381.189	1.17676	0.943113	0.0005071	0.003258	pos	5.9217	6.0457	5.7797	5.9063	6.0292	5.8597	5.6717	5.5697	5.3911	5.5013	5.7176	5.6734
pos_8802	metab_8801	2,6-Dihydroxynaphthalene	C10H8O2	-	5.564	161.06	1.08169	0.948328	7.724e-05	0.001388	pos	5.348	5.4493	5.323	5.2467	5.3152	5.2468	5.1391	5.0453	4.9249	5.0151	5.0911	5.0665
pos_8830	metab_8829	3,4-Dimethyl-5-propyl-2-furandodecanoic acid	C21H36O3	HMDB0112076	5.50323	381.239	1.65708	0.880062	1.373e-05	0.0007751	pos	5.0725	5.3817	5.1165	5.0198	5.1838	5.0417	4.5201	4.5387	4.3806	4.3456	4.6917	4.6422
pos_8844	metab_8843	Quinaprilat	C23H26N2O5	HMDB0042005	5.46527	428.219	1.34114	0.915465	0.000132	0.001674	pos	5.0121	5.1413	4.9823	4.8672	5.0303	4.9175	4.6137	4.6005	4.3505	4.4762	4.6738	4.7026
pos_8853	metab_8852	5-Acetyl-2,3-dihydro-1H-pyrrolizine	C9H11NO	HMDB0040051	5.4501	150.092	1.09128	0.938979	0.006271	0.01793	pos	5.3519	5.5116	4.9917	5.365	5.4777	5.26	5.0168	5.1042	4.8497	4.8761	5.0825	5.0771
pos_8863	metab_8862	5,7,9,11,13-tetradecapentaenoic acid	C14H18O2	LMFA01030258	5.41965	219.138	1.24958	0.920027	3.788e-05	0.001043	pos	4.3961	4.4898	4.2623	4.3895	4.4893	4.3048	4.0731	4.0448	3.9339	3.957	4.1015	4.115
pos_8883	metab_8882	Edulisin VI	C20H22O9	HMDB0041265	5.35892	371.113	1.18947	0.933086	0.0005903	0.003563	pos	5.2105	5.2938	5.0751	4.9386	5.2033	5.0325	4.8154	4.7079	4.6236	4.8272	4.8543	4.8672
pos_8921	metab_8920	Oleoside dimethyl ester	C18H26O11	HMDB0031350	5.26782	441.134	1.77161	0.861203	0.003189	0.01107	pos	6.1456	5.0314	5.6623	5.9044	6.1135	5.7714	4.6555	4.8982	4.8816	4.8417	5.2755	5.2669
pos_8941	metab_8940	Ansamitocin P3	C32H43ClN2O9	LMPK04000039	5.21355	635.272	1.61658	0.911546	1.481e-05	0.0007951	pos	6.4636	6.5336	6.4086	6.4022	6.5059	6.3522	5.9664	5.8434	5.7929	5.673	5.9949	5.9756
pos_8957	metab_8956	Sinapyl alcohol	C11H14O4	HMDB0013070	5.1909	193.086	1.03384	0.947114	0.000405	0.00284	pos	4.9593	5.1368	4.9784	4.9683	4.8969	4.9	4.8088	4.7076	4.5606	4.6706	4.7722	4.743
pos_8963	metab_8962	Rutalinium	C16H20NO4+	HMDB0033348	5.1758	603.27	1.33616	0.921656	0.002158	0.008391	pos	5.8159	5.9999	5.7321	5.8046	5.9786	5.7433	5.458	5.5231	5.008	5.2456	5.5279	5.5637
pos_9018	metab_9017	3''-Hydroxy-geranylhydroquinone	C16H22O3	-	5.0685	263.164	1.3469	0.914577	7.246e-05	0.001346	pos	4.8929	5.0643	4.781	4.8331	5.0254	4.8305	4.5011	4.5016	4.323	4.3959	4.5968	4.5961
pos_9066	metab_9065	FLAVANONE	C15H12O2	-	5.01613	225.091	1.02737	0.958163	0.0001586	0.001817	pos	5.9331	5.9663	5.8408	5.8216	5.9263	5.7942	5.7078	5.5935	5.5061	5.6312	5.676	5.6879
pos_9085	metab_9084	4-hydroxyestradiol	C18H24O3	HMDB0005896;LMST02010028	4.99378	289.18	1.19781	0.928557	0.0007942	0.004267	pos	5.0007	5.1505	4.7806	4.9449	5.115	4.9075	4.6769	4.6454	4.4239	4.5499	4.7131	4.7538
pos_9093	metab_9092	Isoleucyl-Glutamine	C11H21N3O4	HMDB0028905	4.97118	242.15	2.63181	0.601357	0.006789	0.01904	pos	5.1725	4.4781	3.8569	3.207	5.8837	3.9208	2.674	2.6983	2.5625	2.6221	2.6962	2.6965
pos_9103	metab_9102	1,5-bis(4-hydroxy-3-methoxyphenyl)-1,4-pentadien-3-one	C19H18O5	HMDB0040930	4.9485	327.123	1.10329	0.937653	0.000638	0.003724	pos	4.9554	5.0151	4.9813	4.7894	4.787	4.8258	4.6634	4.5616	4.3859	4.5603	4.68	4.6713
pos_9131	metab_9130	Coronafacic acid	C12H16O3	-	4.92592	209.117	1.37079	0.913655	8.556e-05	0.001432	pos	4.9874	5.1352	4.8196	4.9422	5.1108	4.8849	4.618	4.5246	4.432	4.4176	4.6526	4.6539
pos_9152	metab_9151	5,6,7-trimethoxy-2-phenyl-4H-chromen-4-one	C18H16O5	HMDB0128592	4.9034	277.086	1.33474	0.915116	0.0001844	0.001944	pos	4.8723	4.9652	4.7927	5.0427	4.9051	4.7549	4.5789	4.492	4.2478	4.3802	4.5645	4.5811
pos_9162	metab_9161	Melleolide B	C24H32O7	HMDB0038787	4.88087	496.234	1.18766	0.883562	0.02049	0.04316	pos	3.882	3.8242	3.5707	3.176	3.2576	3.3133	3.1139	3.1269	3.0022	3.0619	3.1361	3.1364
pos_9163	metab_9162	Fluprostenol Lactone Diol	C18H19F3O5	-	4.88087	373.129	1.3801	0.906419	0.003876	0.01273	pos	5.3249	5.3432	4.9027	4.8879	5.4876	5.0863	4.7022	4.6705	4.5365	4.6724	4.7578	4.7887
pos_9199	metab_9198	7C-aglycone	C18H18O4	HMDB0004808	4.80508	299.128	1.17301	0.938705	0.0004072	0.002846	pos	5.4995	5.6285	5.4816	5.4475	5.5037	5.4252	5.1894	5.2899	4.924	5.1708	5.1971	5.193
pos_9215	metab_9214	6-Hydroxysandoricin	C31H40O12	HMDB0037556	4.7595	637.288	1.72986	0.877912	4.182e-05	0.001065	pos	5.6309	5.1713	5.2471	5.4687	5.3944	5.2776	4.6939	4.6193	4.6239	4.6975	4.7901	4.8362
pos_9221	metab_9220	3-Ethyltoluene	C9H12	-	4.7595	121.101	1.25355	0.921581	0.00146	0.006372	pos	4.825	5.0677	4.6618	4.8474	5.1042	4.7988	4.517	4.5337	4.4037	4.396	4.5787	4.5778
pos_9234	metab_9233	1'-Acetoxychavicol acetate	C13H14O4	HMDB0041005	4.72915	235.097	1.41617	0.894405	0.0004202	0.002907	pos	4.6192	4.8167	4.4634	4.3611	4.7781	4.5191	4.1411	4.0817	3.8822	4.149	4.1993	4.1928
pos_9238	metab_9237	Formylfusarochromanone	C16H20N2O5	HMDB0038970	4.72155	303.134	1.1344	0.918523	0.02272	0.04673	pos	4.7156	5.1416	4.797	4.8255	4.8271	4.7822	4.4797	4.5148	4.0346	4.165	4.7295	4.794
pos_9240	metab_9239	Americanin A	C18H16O6	HMDB0030834	4.71398	329.102	1.2798	0.931072	0.000155	0.0018	pos	5.6387	5.6477	5.5401	5.4695	5.6378	5.4918	5.3049	5.1853	4.9822	5.1096	5.2752	5.2665
pos_9254	metab_9253	Pyrimethamine-3-N-Oxide	C12H13ClN4O	-	4.69127	265.086	1.38096	0.909692	0.0001874	0.001958	pos	5.0375	5.1259	4.9182	4.9017	5.0818	4.8964	4.6621	4.5821	4.2876	4.4427	4.6506	4.6327
pos_9283	metab_9282	Pteroic acid	C14H12N6O3	-	4.65353	313.107	1.26121	0.932981	7.656e-05	0.001385	pos	5.537	5.6036	5.446	5.3832	5.5908	5.3837	5.2406	5.0779	4.9638	5.0926	5.1826	5.1783
pos_9284	metab_9283	Desmethoxymatteucinol	C17H16O4	LMPK12140192	4.65353	285.112	1.31853	0.938345	2.367e-05	0.0009059	pos	6.4375	6.4333	6.2834	6.291	6.4422	6.2593	6.0444	5.9519	5.7986	5.9297	6.0442	6.0244
pos_9346	metab_9345	N-(1-Deoxy-1-fructosyl)serine	C9H17NO8	HMDB0037842	4.55508	285.127	1.25576	1.10339	0.02954	0.05745	pos	4.3527	5.1255	4.8742	4.7712	4.1893	5.0067	5.1472	5.5295	4.9294	4.843	5.4393	5.3595
pos_9348	metab_9347	Thymidine glycol	C10H16N2O7	HMDB0042036	4.54752	309.129	2.57468	0.608014	0.01833	0.03954	pos	4.3697	4.7084	4.2659	4.3321	4.7654	4.3582	2.9166	0.343	2.787	2.7225	3.6721	3.8547
pos_9374	metab_9373	DIHYDRO TANSHINONE	C18H14O3	-	4.4792	279.102	1.74708	0.85132	0.0003706	0.002726	pos	4.5662	5.1676	4.6175	4.5677	4.9177	4.5722	4.1098	3.8099	4.0166	3.9451	4.151	4.1561
pos_9402	metab_9401	Miraxanthin-V	C17H18N2O6	-	4.426	347.124	1.6491	0.901639	7.604e-06	0.0007062	pos	6.0469	6.2884	5.989	6.0653	6.2331	5.9801	5.5645	5.5002	5.3811	5.3409	5.6084	5.6035
pos_9420	metab_9419	3-Methylindole	C9H9N	HMDB0000466	4.40323	132.081	1.66472	0.858101	0.001611	0.006811	pos	5.0445	4.9889	4.468	5.0816	5.1231	4.806	3.7032	4.4869	4.0092	4.284	4.4147	4.4286
pos_9446	metab_9445	5-Hydroxythalidomide	C13H10N2O5	HMDB0013871	4.35002	257.056	1.25544	0.916149	0.0006414	0.003736	pos	4.8421	4.9937	4.9555	4.6975	4.6885	4.8002	4.5594	4.3921	4.1293	4.4774	4.48	4.5094
pos_9450	metab_9449	2-Ethyltoluene	C9H12	-	4.35002	121.102	1.38342	0.903078	0.0003054	0.002451	pos	4.6029	4.7444	4.3707	4.4992	4.7602	4.5102	4.1364	4.1934	4.0539	4.043	4.2204	4.1779
pos_9457	metab_9456	4,5-Dihydrovomifoliol	C13H22O3	HMDB0040615	4.33482	227.164	1.48325	0.890141	0.0006203	0.003677	pos	4.929	5.176	4.7612	5.025	5.0559	4.8724	4.4325	4.7059	4.1772	4.1714	4.5025	4.5547
pos_9497	metab_9496	CD 1790	C25H27N7O3	HMDB0060809	4.26647	456.214	1.75431	0.863558	9.235e-05	0.001468	pos	5.1831	5.4414	4.9495	5.201	5.4457	5.0479	4.5979	4.5616	4.2508	4.2715	4.6968	4.6196
pos_9530	metab_9529	Cis-3,4-Phenanthrenedihydrodiol-4-carboxylate	C15H12O4	-	4.2057	257.081	1.08708	0.93585	0.003578	0.01201	pos	4.9594	4.7934	4.6816	4.8883	4.975	4.7929	4.6604	4.5539	4.3598	4.3199	4.6921	4.6331
pos_9540	metab_9539	Panaxydol chlorohydrin	C17H25ClO2	HMDB0039534	4.1905	329.186	2.57615	0.610629	0.01079	0.02662	pos	5.2842	4.5111	3.514	3.6273	6.276	3.7688	3.1142	2.7063	2.5818	2.6414	2.7155	2.7158
pos_9588	metab_9587	Echinone	C19H20O6	-	4.0839	345.134	1.04323	0.937125	0.004361	0.01383	pos	4.9032	5.0093	4.8931	4.8108	4.6512	4.742	4.6422	4.519	4.2258	4.596	4.5995	4.6063
pos_9600	metab_9599	4-Heptyloxybenzoic acid	C14H20O3	-	4.0687	237.149	1.283	0.922935	9.545e-05	0.001478	pos	4.8677	5.0271	4.7702	4.844	4.9961	4.7667	4.5413	4.4827	4.366	4.4314	4.6083	4.5873
pos_9614	metab_9613	1-[(5-Amino-5-carboxypentyl)amino]-1-deoxyfructose	C12H24N2O7	HMDB0034879	4.04587	353.127	1.73301	0.842347	0.008472	0.02234	pos	5.4932	4.793	4.7209	4.5506	5.7158	4.7933	4.2237	4.2742	4.0389	4.1335	4.3485	4.3092
pos_9650	metab_9649	4-Isopropylphenylacetaldehyde	C11H14O	HMDB0041493	3.98493	163.112	1.09986	0.933374	0.003848	0.01267	pos	4.7781	5.0638	4.6678	4.8819	5.0803	4.7981	4.5802	4.646	4.3711	4.4085	4.6661	4.6443
pos_9653	metab_9652	12-oxo-5E,8E,10Z-dodecatrienoic acid	C12H16O3	LMFA01060095	3.97733	209.118	1.08775	0.934221	0.006267	0.01792	pos	4.8666	5.163	4.6877	4.9896	5.1555	4.8715	4.643	4.734	4.4676	4.483	4.7281	4.7269
pos_9660	metab_9659	Perindoprilat	C17H28N2O5	HMDB0060574	3.96213	341.207	1.63968	0.852929	0.002168	0.008424	pos	4.553	4.9819	4.6048	4.5345	4.6561	4.5313	3.8914	4.1385	3.5735	3.5961	4.2625	4.3059
pos_9677	metab_9676	Abrine	C12H14N2O2	-	3.9241	219.113	1.13856	0.922749	0.004967	0.01512	pos	4.7963	4.8803	4.4234	4.7	4.7391	4.576	4.2802	4.5842	4.0834	4.1667	4.4143	4.4165
pos_9679	metab_9678	Ent-Corey PG-Lactone Diol	C15H24O4	-	3.91648	269.175	1.1489	0.919687	0.006902	0.01925	pos	4.5172	4.8295	4.2995	4.6949	4.7982	4.5016	4.2672	4.4001	4.0606	3.9919	4.3524	4.3488
pos_9702	metab_9701	Americanin D	C18H16O6	HMDB0039601	3.86323	329.103	1.13453	0.939596	0.0005452	0.003401	pos	5.0979	5.2007	5.1022	5.0384	5.1368	5.0179	4.8897	4.7741	4.5901	4.7316	4.8818	4.876
pos_9759	metab_9758	Cumene	C9H12	-	3.75692	121.102	1.18416	0.933802	0.003226	0.01116	pos	5.6764	5.9329	5.4317	5.7564	5.7702	5.6004	5.3501	5.4513	5.0642	5.1541	5.4432	5.4469
pos_9819	metab_9818	Norketamine	C12H14ClNO	HMDB0060549	3.6277	206.073	2.21208	0.71584	0.001622	0.006843	pos	4.8313	4.3631	4.4116	4.1356	5.3741	4.4612	3.7899	3.8617	2.5827	2.5673	3.5823	3.3562
pos_9836	metab_9835	3-hydroxyhexanoyl carnitine	C14H27NO5	HMDB0061633	3.58203	290.197	1.13115	0.939079	0.0005696	0.003493	pos	5.1281	5.2675	5.0151	5.0239	5.1919	5.0045	4.846	4.7981	4.6323	4.6973	4.8756	4.9129
pos_9855	metab_9854	Dihydronepetalactone	C10H16O2	HMDB0035829	3.55157	169.123	1.55271	0.89122	2.308e-05	0.0008991	pos	4.944	4.8957	4.7312	4.9087	5.137	4.8379	4.2929	4.4002	4.337	4.2451	4.4938	4.4839
pos_9870	metab_9869	3,4-Dimethylstyrene	C10H12	-	3.52118	133.101	1.0742	0.937981	0.004596	0.01437	pos	5.048	5.3006	4.8025	5.1457	5.0951	4.9866	4.8137	4.8501	4.613	4.5729	4.8145	4.8318
pos_9880	metab_9879	Threoninyl-Proline	C9H16N2O4	HMDB0029069	3.50598	217.119	1.8483	0.752505	0.001759	0.007237	pos	3.2708	3.4674	2.9835	3.4191	3.5001	3.1185	2.2463	2.3426	2.247	2.1535	3.0996	2.7769
pos_9899	metab_9898	6-Formylumbelliferone	C10H6O4	HMDB0039147	3.4679	208.061	1.08349	0.931965	0.0005478	0.003413	pos	4.1214	4.2268	4.1203	4.1678	4.3915	4.1052	3.8639	3.9767	3.7701	3.9045	3.9692	3.9417
pos_9928	metab_9927	(1R,2S,3S,4R)-p-Menthane-2,3-diol	C10H20O2	HMDB0035723	3.40697	214.18	1.27091	0.905396	0.002703	0.009839	pos	4.3823	4.6537	4.2775	4.1836	4.7063	4.3701	4.0756	3.9981	3.8301	3.9305	4.1092	4.115
pos_9956	metab_9955	Garcinone D	C24H28O7	HMDB0033332	3.34607	446.218	1.18776	0.904029	0.01834	0.03956	pos	4.6236	5.0151	4.9152	4.9171	4.2772	4.698	4.3437	4.328	3.7219	4.346	4.5521	4.4232
pos_9974	metab_9973	Norbixin	C24H28O4	LMPR01070209;HMDB0035832	3.31567	403.187	1.29919	0.892674	0.01332	0.03104	pos	4.6399	4.8068	4.2481	4.9628	4.904	4.4479	4.2307	4.5151	3.7968	3.8034	4.3478	4.3088
pos_9989	metab_9988	Alitame	C14H25N3O4S	HMDB0037324	3.30045	296.14	1.75807	0.784772	0.02347	0.04792	pos	4.9229	4.2945	3.5884	3.9549	5.4203	3.746	3.617	3.7009	2.8238	3.151	3.4411	3.6114
pos_10001	metab_10000	N-Propionylmethionine	C8H15NO3S	HMDB0094704	3.27763	206.085	1.44074	1.11429	0.0001543	0.001796	pos	4.1326	4.2798	4.1138	4.3049	4.2155	4.3638	4.659	4.8194	4.5942	4.506	4.8453	4.892
pos_10025	metab_10024	Isoleucylproline	C11H20N2O3	HMDB0011174	3.24723	270.182	1.12992	0.909346	0.03006	0.05822	pos	4.8443	4.8464	4.1648	4.4765	4.9389	4.5247	3.9355	4.6004	4.0564	3.9254	4.3737	4.3838
pos_10028	metab_10027	3-O-Benzyl-4,5-O-(1-methylethyldiene)-b-D-fructopyranose	C16H22O6	-	3.23962	311.147	1.41096	0.890745	0.001018	0.004973	pos	4.5232	4.6918	4.3482	4.5365	4.7379	4.4591	4.1428	4.1319	3.7184	3.8716	4.2029	4.2449
pos_10039	metab_10038	Hygromycin B	C20H37N3O13	HMDB0034229	3.22438	492.224	1.44534	0.850808	0.008847	0.02299	pos	3.8013	4.6104	4.1574	3.8715	3.8804	4.17	3.1452	3.2514	3.12	3.7337	3.9312	3.6575
pos_10078	metab_10077	Methyl helianthenoate A glucoside	C19H24O8	HMDB0040899	3.15467	444.166	2.18884	0.776699	9.222e-05	0.001467	pos	5.2489	5.2753	4.7096	4.919	5.41	4.7213	4.3041	4.1802	3.5495	3.5791	4.0854	3.8198
pos_10082	metab_10081	4-nonenoylglycine	C11H19NO3	HMDB0094809	3.14703	255.171	1.25815	0.919327	0.0006478	0.003756	pos	4.5319	4.8221	4.5345	4.6064	4.8196	4.5044	4.3588	4.2112	4.1442	4.2332	4.3417	4.2834
pos_10165	metab_10164	ETHYL SYRINGATE	C11H14O5	-	3.00147	227.092	1.0015	0.956266	0.0002467	0.002219	pos	5.6488	5.6751	5.674	5.5913	5.4944	5.5268	5.4714	5.3273	5.2429	5.392	5.3559	5.3546
pos_10216	metab_10215	(S)-Acetoin	C4H8O2	-	2.9328	89.0603	1.20281	0.91846	0.005224	0.01568	pos	5.1185	4.7595	4.6178	4.6628	5.0942	4.7394	4.3991	4.582	4.2267	4.3558	4.5303	4.5359
pos_10227	metab_10226	P-cresol	C7H8O	HMDB0001858	2.92407	109.065	1.12189	0.936837	0.0001669	0.001861	pos	4.4952	4.6446	4.4549	4.4809	4.6396	4.4523	4.2797	4.2559	4.1923	4.1749	4.2751	4.2713
pos_10258	metab_10257	L-1,2,3,4-Tetrahydro-beta-carboline-3-carboxylic acid	C12H12N2O2	HMDB0035665	2.87078	217.098	1.50604	0.840769	0.004933	0.01506	pos	4.131	3.9556	3.3804	3.9082	4.2608	3.7635	3.1483	3.5969	2.9949	2.9458	3.4044	3.5857
pos_10274	metab_10273	2,6Z-Nonadien-4-olide	C9H12O2	LMFA07040019	2.83913	153.091	1.11207	0.938727	0.0002873	0.002387	pos	4.5799	4.6683	4.4679	4.5639	4.7212	4.5161	4.3392	4.2941	4.2466	4.2627	4.3411	4.3453
pos_10280	metab_10279	(E,E)-Trichostachine	C16H17NO3	HMDB0029374	2.8239	289.155	1.01091	0.941572	0.003182	0.01106	pos	4.808	4.9606	4.5619	4.6876	4.8214	4.7059	4.6124	4.5181	4.3383	4.3726	4.5515	4.4881
pos_10330	metab_10329	Cytokinin B	C12H11N5	HMDB0039238	2.75413	243.134	1.50902	0.83242	0.02382	0.04848	pos	4.0083	4.1253	3.9806	3.8613	5.2771	3.9178	3.5596	3.7623	3.5084	2.9265	3.7263	3.4701
pos_10340	metab_10339	N-Acetyltryptophan	C13H14N2O3	HMDB0013713	2.7389	247.108	1.02119	0.935846	0.00805	0.02155	pos	4.6706	4.9183	4.4951	4.7605	4.8618	4.6288	4.5037	4.5446	4.1453	4.3041	4.5303	4.4951
pos_10364	metab_10363	Flavine mononucleotide (FMN)	C17H21N4O9P	-	2.69317	457.113	2.31098	0.78444	4.871e-05	0.001137	pos	6.1485	5.6245	5.5226	5.3697	5.7463	5.2101	4.1712	4.7286	4.242	4.056	4.6855	4.4917
pos_10438	metab_10437	4-Hydroxy-6-methyl-3-(1-oxobutyl)-2H-pyran-2-one	C10H12O4	HMDB0040637	2.5766	238.108	1.15888	0.920172	0.007766	0.02099	pos	4.8111	4.7812	4.2695	4.6798	4.8517	4.5697	4.1879	4.4315	4.1233	4.1322	4.3775	4.4772
pos_10447	metab_10446	3-methyl-2-nitrophenyl acetate	C9H9NO4	-	2.56137	196.061	1.1388	0.927219	0.001457	0.006366	pos	4.7389	5.0312	4.7305	4.6247	4.7166	4.6829	4.5015	4.5607	4.2536	4.2354	4.4632	4.4327
pos_10478	metab_10477	N-Butylscopolamine metabolite	C12H21NO2	-	2.52333	212.165	1.31827	0.902492	0.0002813	0.002372	pos	4.17	4.3134	4.0379	4.0153	4.3581	4.1492	3.7738	3.7357	3.6694	3.7213	3.8193	3.8824
pos_10497	metab_10496	(2-oxo-2,3-dihydro-1H-indol-3-yl)acetic acid	C10H9NO3	-	2.4994	174.055	1.38122	0.900727	0.01466	0.03326	pos	5.2625	5.3757	5.1374	5.2451	5.2465	5.103	4.0117	4.964	4.6906	4.7861	4.8894	4.9149
pos_10504	metab_10503	7-Hydroxy-2-methylisoflavone	C16H12O3	LMPK12050001;HMDB0033979	2.49182	253.086	1.99979	0.825151	4.359e-05	0.001082	pos	4.9334	5.0857	4.8434	5.0692	5.0419	4.8455	4.0465	4.0582	4.1529	3.7173	4.3179	4.3112
pos_10512	metab_10511	L-phenylalanyl-L-proline	C14H18N2O3	-	2.48425	263.139	1.31278	0.919614	0.001322	0.005936	pos	5.4881	5.6791	5.2953	5.3357	5.7561	5.3614	5.2052	5.1256	4.8436	4.9175	5.0916	5.0883
pos_10559	metab_10558	Strobopinin	C16H14O4	LMPK12140187	2.41615	271.097	2.18874	0.769115	6.529e-05	0.001284	pos	4.6306	4.9035	4.5389	4.5947	4.7668	4.4998	3.7606	3.5925	3.228	3.2161	3.7935	3.8931
pos_10593	metab_10592	6-Imino-5-oxocyclohexa-1,3-dienecarboxylate	C7H5NO3	-	2.3783	152.034	1.19676	0.933085	0.0005076	0.003258	pos	4.9686	5.2505	4.9532	5.1962	5.1845	5.0219	4.7726	4.8123	4.6595	4.6526	4.8239	4.8072
pos_10605	metab_10604	2-Oxo-1,2-dihydroquinoline-4-carboxylate	C10H7NO3	-	2.36315	190.05	1.09748	0.942663	0.01072	0.0265	pos	6.0844	6.4063	5.8386	6.2606	6.352	6.1017	5.8697	5.9548	5.5587	5.6275	5.9473	5.9605
pos_10635	metab_10634	Homostachydrine	C8H15NO2	-	2.32533	158.117	1.28674	0.900582	0.003066	0.01076	pos	4.4278	4.4854	4.1247	4.0523	4.5358	4.1463	3.8056	3.7713	3.6853	3.9891	4.1208	3.8364
pos_10636	metab_10635	Flavin adenine dinucleotide (FAD)	C27H33N9O15P2	-	2.31825	786.166	2.4073	0.75	0.0003777	0.00274	pos	6.1713	5.5484	5.3495	4.9149	5.9754	5.0426	3.8749	4.4878	3.6422	4.1003	4.356	4.29
pos_10637	metab_10636	Tyrosyl-Proline	C14H18N2O4	HMDB0029113	2.31825	311.16	1.50657	0.873594	0.002621	0.009641	pos	4.7375	5.142	4.656	5.0128	5.107	4.6796	4.5437	4.5997	3.8085	4.1961	4.3782	4.1001
pos_10647	metab_10646	L-(-)-Phenylalanine	C9H11NO2	-	2.29712	207.113	1.64686	0.88459	0.001139	0.00536	pos	6.1566	6.281	5.8694	5.808	6.4798	6.0071	5.4348	5.6146	4.8932	5.252	5.5523	5.6289
pos_10730	metab_10729	Methylthio 2-(propanoyloxy)propanoate	C7H12O3S	HMDB0040003	2.19603	218.085	1.89716	0.774942	0.003765	0.01247	pos	4.1915	4.9817	3.8866	4.0488	4.3289	4.4224	3.5501	3.1223	3.3032	2.4961	3.729	3.8411
pos_10745	metab_10744	Lucidenic acid A	C27H38O6	HMDB0037611	2.17208	472.278	2.65461	0.510013	0.02778	0.05471	pos	4.9665	3.7473	4.2415	4.6067	4.8868	4.5145	3.077	3.203	0.023	0.0263	3.7639	3.6602
pos_10767	metab_10766	Nb-Acetyl-Nb-methyltryptamine	C13H16N2O	HMDB0029837	2.14915	280.141	1.85043	0.796836	0.01105	0.02709	pos	5.1021	5.3229	4.0175	4.2135	5.6762	4.8744	3.9438	4.0773	3.4622	3.5732	4.1187	4.1003
pos_10768	metab_10767	6-Dimethylaminopurine	C7H9N5	HMDB0000473	2.14915	164.093	1.42997	0.847406	0.02908	0.05673	pos	4.4034	4.6001	3.6097	3.6432	4.9391	4.2447	3.624	3.7377	3.3784	3.4704	3.6649	3.6807
pos_10777	metab_10776	Histidinyl-Threonine	C10H16N4O4	HMDB0028895	2.13385	221.104	1.68304	0.822914	0.004896	0.01498	pos	4.4691	4.5725	3.7724	4.0143	4.4771	3.9361	3.0796	3.6425	3.8656	2.942	3.4698	3.771
pos_10818	metab_10817	Sapidolide A	C14H18O5	HMDB0041582	2.07932	284.15	2.09961	0.659047	0.03213	0.06124	pos	4.9467	3.6818	3.6137	3.9309	4.7677	3.9946	1.6635	4.0199	1.7864	1.5643	3.5692	3.8316
pos_10832	metab_10831	3,4-Dimethoxyphenyl methyl ketone	C10H12O3	-	2.07172	181.086	1.02345	0.948214	0.0001045	0.001517	pos	4.7696	4.8146	4.6636	4.7049	4.7932	4.6393	4.5307	4.5312	4.3619	4.4814	4.4967	4.5148
pos_10846	metab_10845	2-Pyrimidin-2-yl-Propionic Acid	C7H8N2O2	-	2.05645	153.066	1.20051	0.921339	0.005021	0.01524	pos	4.9288	4.9737	4.5143	4.914	5.1297	4.7551	4.4214	4.6581	4.3895	4.318	4.5554	4.5756
pos_10863	metab_10862	Quinic acid	C7H12O6	HMDB0003072	2.02587	210.099	1.86402	0.765957	0.006875	0.01921	pos	4.2558	4.9517	3.9978	3.4619	5.0607	4.4987	3.3208	3.7107	2.7012	3.3468	3.4744	3.5317
pos_10905	metab_10904	Alpha-Methyltryptamine (AMT)	C11H14N2	-	1.99432	175.123	1.13785	0.917607	0.019	0.04069	pos	4.9241	5.2189	4.4945	4.9099	5.3127	4.9225	4.5649	4.7146	4.1694	4.5357	4.6587	4.6845
pos_10910	metab_10909	Alpha-Rotunol	C15H22O2	HMDB0035869	1.98675	273.124	2.10201	0.755949	0.008281	0.022	pos	5.5177	4.9315	4.2966	4.2853	6.0557	4.417	3.8154	3.9677	3.0976	3.6786	3.909	3.8353
pos_10939	metab_10938	DL-Norleucine	C6H13NO2	-	1.96415	173.129	1.35149	0.921687	0.00138	0.006117	pos	6.0361	6.4122	6.0071	5.8802	6.37	6.1435	5.6905	5.7362	5.3665	5.6604	5.7604	5.7511
pos_11010	metab_11009	Hydroxyisonobilin	C20H26O6	HMDB0034475	1.87193	327.156	1.09419	0.941119	0.002372	0.008979	pos	5.3331	5.2028	4.9753	5.053	5.2791	5.0299	4.7955	4.9125	4.6958	4.8007	4.9391	4.9114
pos_11054	metab_11053	8-Methoxykynurenate	C11H9NO4	HMDB0060426	1.78712	261.087	1.80187	0.830989	8.086e-05	0.001411	pos	4.3697	4.8561	4.2857	4.5254	4.5476	4.2867	3.9838	3.6641	3.4633	3.7528	3.8725	3.5982
pos_11109	metab_11108	3-Hydroxypropanal	C3H6O2	HMDB0003453	1.71745	75.0447	1.43843	0.898711	0.0005143	0.003278	pos	5.2358	4.9881	4.7784	4.8092	5.1443	4.8426	4.4863	4.5389	4.1975	4.4142	4.5562	4.5831
pos_11140	metab_11139	Hypusine	C10H23N3O3	HMDB0011140;LMFA01050514	1.67953	198.16	2.37237	0.665144	0.006039	0.01743	pos	5.0573	4.0653	3.5498	3.5526	5.1355	3.6023	2.7843	2.7973	2.6728	2.7323	2.8064	2.8068
pos_11188	metab_11187	(4R,5S,7R,11x)-11,12-Dihydroxy-1(10)-spirovetiven-2-one 12-glucoside	C21H34O8	HMDB0030895	1.61233	379.208	1.7216	0.807956	0.01663	0.03667	pos	5.9709	4.4224	5.1872	4.8895	5.0125	5.1354	4.4375	4.7984	2.956	3.8195	4.428	4.2978
pos_11244	metab_11243	Dimethyltryptamine	C12H16N2	HMDB0005973	1.51367	206.165	2.60945	0.621853	0.003626	0.01214	pos	4.3907	4.2467	4.7317	3.5218	5.933	3.8636	2.8772	2.6597	2.6112	2.5948	3.1833	2.6693
pos_11271	metab_11270	5-Aminopentanal	C5H11NO	HMDB0012815	1.49083	244.202	2.20224	0.690138	0.005692	0.0167	pos	5.2345	3.162	3.6505	4.1225	4.6372	4.4984	2.6627	3.0207	2.6533	2.6107	3.1239	3.3951
pos_11273	metab_11272	N-Acetylmannosamine	C8H15NO6	HMDB0001129	1.49083	186.076	1.07992	0.936622	0.008206	0.02184	pos	5.3799	5.3717	5.0327	5.0309	5.5357	5.2686	4.8453	5.0791	4.8165	4.8347	5.0277	5.012
pos_11385	metab_11384	Aldosine	C12H18N2O4	HMDB0037817	1.23882	255.134	1.1099	0.925793	0.001057	0.005093	pos	4.2146	4.3446	3.9978	4.1747	4.2984	4.1151	3.8431	4.0353	3.8429	3.712	3.9254	3.9209
pos_11429	metab_11428	Xi-2,3-Dihydro-2-oxo-1H-indole-3-acetic acid	C10H9NO3	HMDB0035514	1.1557	400.147	1.9453	0.72051	0.02505	0.05047	pos	5.0706	5.0804	3.355	2.9451	5.0545	4.3834	2.883	3.5463	2.7715	2.831	3.0782	3.544
pos_11458	metab_11457	Erinapyrone A	C7H10O3	HMDB0041426	1.11047	184.097	1.62435	0.882902	0.0003869	0.002776	pos	5.8819	5.5928	5.5214	5.2766	5.7712	5.3655	4.9678	5.1886	4.6005	4.8325	4.964	4.9403
pos_11489	metab_11488	N-Acetyl-L-glutamate 5-semialdehyde	C7H11NO4	HMDB0006488	1.07285	138.055	1.24998	0.922135	0.008209	0.02185	pos	5.5408	5.5868	5.0974	5.3112	5.8611	5.4284	5.0068	5.1519	4.9772	4.8801	5.131	5.1215
pos_11521	metab_11520	Alanyl-Proline	C8H14N2O3	HMDB0028695	1.01277	151.087	1.59029	0.867452	0.001613	0.006815	pos	4.9167	4.9994	4.4096	4.5926	5.0947	4.5045	4.0041	4.269	3.8112	4.181	4.1927	4.2778
pos_11730	metab_11729	2-Methyl-3-hydroxy-5-formylpyridine-4-carboxylate	C8H7NO4	HMDB0006954	0.78725	182.045	1.20393	0.922505	0.006171	0.01771	pos	4.9974	5.4052	4.8389	5.1597	5.3272	4.9293	4.8246	4.7916	4.4465	4.6694	4.7563	4.7978
pos_11787	metab_11786	D-Arabinose 5-phosphate	C5H11O8P	HMDB0011734	0.765	213.016	1.12259	1.07023	0.04712	0.08242	pos	5.0119	5.526	5.8688	5.3916	5.0195	5.7333	5.8724	5.7646	5.6623	5.8935	5.818	5.8252
pos_11809	metab_11808	4-AMINO-3- (5-CHLOROTHIEN-2-YL)BUTANOIC ACID	C8H10ClNO2S	-	0.7575	220.019	2.59221	0.591308	0.007705	0.02087	pos	5.0553	5.2664	3.8583	2.638	5.0618	4.0793	2.5759	2.5889	2.4645	2.524	2.5981	2.5984
pos_12311	metab_12310	Spermine	C10H26N4	HMDB0001256	0.557583	203.223	2.08196	1.24337	0.01373	0.03175	pos	5.0402	4.94	4.828	5.5571	3.4666	5.8237	5.6077	6.0902	6.426	6.3469	6.0569	6.3491
pos_12440	metab_12439	N-Isobutyrylglycine	C6H11NO3	-	0.505133	291.155	1.44644	0.83964	0.04644	0.08148	pos	4.6827	3.9805	4.0032	4.1976	4.808	4.3344	2.7512	4.1246	3.953	2.9171	3.9356	4.1505
pos_12479	metab_12478	Phenylethanolaminium	C8H12NO+	HMDB0062626	0.474717	139.098	1.29312	1.1219	0.00474	0.01467	pos	3.6352	3.6847	3.9011	3.57	3.21	3.8034	3.8352	4.2561	4.2476	3.9631	4.0908	4.0702
neg_33	metab_12540	Polyethylene, oxidized	C12H20O5	HMDB0032472	3.76422	243.124	1.08993	0.950282	0.005899	0.01711	neg	6.7095	6.9645	6.4683	6.8284	6.7859	6.6725	6.4291	6.5418	6.145	6.2566	6.5128	6.5355
neg_36	metab_12543	Dihydro-3-coumaric acid	C9H10O3	-	4.04303	165.055	1.12282	0.951613	0.001023	0.004981	neg	6.8666	6.6855	6.5372	6.5233	6.6164	6.5755	6.3833	6.3	6.0903	6.3393	6.3842	6.3783
neg_47	metab_12554	6-Oxopiperidine-2-carboxylic acid	C6H9NO3	HMDB0061705	0.796283	188.056	1.01484	0.951493	0.02093	0.04385	neg	6.4935	6.7237	6.1996	6.1367	6.641	6.3969	6.0818	6.1914	6.0262	6.0299	6.1944	6.1978
neg_151	metab_12658	5C-aglycone	C16H16O4	HMDB0004810	4.5686	271.098	1.11771	0.958562	0.0003088	0.002466	neg	7.1227	7.1579	7.0643	7.0638	7.1474	7.013	6.8883	6.8227	6.6182	6.747	6.8588	6.8711
neg_160	metab_12667	2'-Deoxyuridine	C9H12N2O5	-	1.08438	227.068	1.52101	0.873735	0.01612	0.0358	neg	6.0264	5.8406	5.1007	4.9637	6.209	5.6472	5.1226	4.9969	4.4642	4.8574	5.033	5.0471
neg_166	metab_12673	()-Enterolactone	C18H18O4	-	5.89578	297.114	1.15643	1.06621	0.01046	0.02602	neg	5.5826	5.9083	5.7891	6.036	5.5424	6.1227	6.382	5.9783	6.1649	6.0498	6.3383	6.3855
neg_178	metab_12685	1,11-Undecanedicarboxylic acid	C13H24O4	HMDB0002327	6.14197	243.16	1.06845	0.948094	0.01655	0.03654	neg	6.7021	6.5398	6.13	6.5382	6.7714	6.5026	6.4467	5.9825	6.2206	5.9887	6.2493	6.2653
neg_180	metab_12687	Tetradecanedioic acid	C14H26O4	LMFA01170018;HMDB0000872	6.17253	257.176	1.14762	0.956215	7.122e-05	0.00134	neg	6.7527	6.9068	6.7851	6.8451	6.8266	6.7184	6.6237	6.4456	6.4475	6.4064	6.5635	6.5586
neg_269	metab_12776	3-Methyladipic acid	C7H12O4	HMDB0000555	3.0225	159.066	1.11587	0.952439	0.001156	0.005407	neg	6.4652	6.6888	6.3577	6.5813	6.6684	6.4755	6.2272	6.2882	6.0919	6.1027	6.3314	6.3245
neg_844	metab_13351	Riboflavin (Vitamin B2)	C17H20N4O6	-	3.0146	375.132	2.608	0.640398	0.0007887	0.00425	neg	5.4363	4.7698	4.4242	3.8305	5.2998	3.9533	3.1318	3.4929	2.5525	2.7716	3.209	2.5927
neg_931	metab_13438	Inosine 5'-monophosphate (IMP)	C10H13N4O8P	-	0.781117	347.041	1.28855	1.08151	0.02648	0.05263	neg	5.7465	6.0062	6.446	5.7148	5.3271	6.0961	6.1674	6.5803	6.2832	6.4768	6.3524	6.354
neg_1061	metab_13568	2,5-Dioxopentanoate	C5H6O4	HMDB0060365	0.796283	129.018	1.06567	0.938526	0.02962	0.05757	neg	5.9075	5.7452	5.5134	5.3353	6.1551	5.697	5.2633	5.4145	5.3094	5.3665	5.4489	5.4429
neg_1104	metab_13611	Yangonin	C15H14O4	HMDB0034144	4.70777	239.072	1.3203	0.917419	1.767e-05	0.0008386	neg	4.6729	4.5497	4.5541	4.7197	4.7777	4.628	4.2139	4.1997	4.2234	4.2195	4.3702	4.3721
neg_1110	metab_13617	Tyrosyl-Isoleucine	C15H22N2O4	HMDB0029108	4.73107	331.109	1.40047	0.893468	0.001501	0.006488	neg	4.5414	4.6735	4.3701	4.6402	4.6806	4.4636	4.0131	4.2015	3.7636	3.9033	4.2635	4.3119
neg_1182	metab_13689	3-hydroxy-6-[(E)-2-methoxyethenyl]-7-methyl-2H-chromen-2-one	C13H12O4	HMDB0135798	5.08818	213.056	1.18905	0.930508	6.989e-05	0.001328	neg	4.704	4.5255	4.7538	4.5984	4.7246	4.5824	4.4071	4.2574	4.3293	4.2094	4.3559	4.3918
neg_1185	metab_13692	(Z)-4-(1-Propenyl)phenol	C9H10O	HMDB0030839	5.1052	179.071	1.13543	0.947919	2.474e-05	0.0009249	neg	5.6136	5.5736	5.5345	5.4436	5.6363	5.4936	5.2703	5.2321	5.1674	5.2478	5.318	5.3225
neg_1297	metab_13804	5-Hydroxy-2-(5-methyl-1-oxo-4-hexenyl)benzofuran	C15H16O3	HMDB0031925	4.5686	289.109	1.17163	0.946034	0.0006466	0.003751	neg	6.1475	6.1846	6.0836	6.0785	6.1704	6.0232	5.8861	5.8244	5.5568	5.7164	5.8569	5.8707
neg_1382	metab_13889	2,3-dinor Prostaglandin E1	C18H30O5	-	6.01995	325.203	1.03668	0.962813	0.000383	0.002766	neg	6.9176	7.0033	6.8001	6.8636	7.0322	6.8512	6.6852	6.6528	6.5323	6.5973	6.7223	6.7318
neg_1446	metab_13953	A-L-Arabinofuranosyl-(1->3)-b-D-xylopyranosyl-(1->4)-D-xylose	C15H26O13	HMDB0038865	6.15727	413.128	1.3131	0.931521	4.154e-05	0.001063	neg	5.6402	5.8012	5.6112	5.6552	5.7169	5.5691	5.3043	5.2543	5.1058	5.2372	5.3947	5.3698
neg_1460	metab_13967	13,14-dihydro Prostaglandin F1alpha	C20H38O5	-	6.19582	357.266	1.44466	0.919863	2.638e-05	0.0009404	neg	5.8435	6.0218	5.791	5.6969	5.927	5.7602	5.4436	5.3329	5.2582	5.3337	5.4285	5.4346
neg_1461	metab_13968	13,14-dihydro-PGE1	C20H36O5	LMFA03010144	6.19582	355.25	1.28026	0.937171	8.168e-05	0.001413	neg	6.0618	6.2293	6.005	5.9716	6.2005	6.0102	5.746	5.7059	5.5456	5.6215	5.7828	5.7873
neg_1480	metab_13987	13'-Hydroxy-alpha-tocotrienol	C29H44O3	HMDB0012560	6.13433	477.287	1.37357	0.925353	0.0001028	0.001508	neg	5.7389	5.9074	5.8093	5.8378	5.8827	5.7071	5.4137	5.5096	5.2384	5.2012	5.4198	5.4975
neg_1487	metab_13994	Hexadecanedioic acid	C16H30O4	LMFA01170022;HMDB0000672	6.2803	285.208	1.23871	0.927491	0.006083	0.01752	neg	6.0954	6.1981	6.1254	5.835	6.2085	6.0296	5.7755	5.8784	5.2282	5.4279	5.756	5.7783
neg_1550	metab_14057	Asperagenin	C27H44O5	HMDB0034293	6.4477	429.298	1.35453	0.915614	0.006818	0.0191	neg	6.1158	6.1715	5.9492	6.7144	6.0155	6.076	5.6458	5.7957	5.148	5.7394	5.8183	5.7682
neg_1660	metab_14167	5-Dodecyldihydro-2(3H)-furanone	C16H30O2	HMDB0031145	6.92292	553.449	1.05134	0.915333	0.03733	0.06859	neg	4.7535	4.8309	4.9817	4.6922	4.2345	4.9929	4.3247	4.3732	4.2438	3.8441	4.7012	4.5906
neg_1892	metab_14399	Uridine monophosphate (UMP)	C9H13N2O9P	-	0.643267	323.03	1.31755	1.09463	0.04199	0.07524	neg	5.5806	6.323	6.7979	6.7376	5.6218	6.0293	6.5527	6.9764	6.7741	6.6979	6.7967	6.8029
neg_2562	metab_15069	(2-Methoxyethoxy)propanoic acid	C6H12O4	HMDB0059705	0.6738	193.072	1.29845	0.897226	0.003826	0.01262	neg	4.3782	5.1015	4.4962	4.6171	4.5786	4.7324	4.208	4.3199	3.886	4.1149	4.1976	4.3086
neg_2810	metab_15317	4-Phenylbutyl glucosinolate	C17H25NO9S2	HMDB0038415	0.81915	486.066	1.61406	1.18037	0.02406	0.0489	neg	3.6917	4.1409	4.8624	4.256	3.2825	4.5848	4.6931	4.7634	4.8993	5.0889	4.9192	4.9257
neg_3059	metab_15566	Gamma-Glutamylvaline	C10H18N2O5	HMDB0011172	1.26415	245.115	1.43139	0.889226	0.005306	0.01586	neg	5.4558	5.5	4.9982	4.8217	5.6331	5.276	4.6691	4.8367	4.25	4.6451	4.8855	4.8903
neg_3094	metab_15601	Pyroglutamylglycine	C7H10N2O4	HMDB0061890	1.35062	167.046	1.38899	0.856557	0.00531	0.01587	neg	4.2312	4.0439	3.7002	3.4108	4.0815	3.9554	3.1935	3.5785	2.958	3.311	3.512	3.5106
neg_3159	metab_15666	2'-Deoxymugineic acid	C12H20N2O7	HMDB0033909	1.5161	653.255	3.02498	0.377626	0.015	0.03388	neg	5.671	3.096	2.9728	3.6463	5.801	5.0906	0.6369	1.4405	0.0227	0.026	3.9414	3.8573
neg_3230	metab_15737	6-Acetyl-2,3-dihydro-2-(hydroxymethyl)-4(1H)-pyridinone	C8H11NO3	HMDB0035178	1.65867	214.072	1.12209	0.92947	0.00313	0.01092	neg	4.4648	4.6262	4.2703	4.3757	4.6549	4.3226	4.1583	4.1581	4.0327	4.0572	4.2006	4.2187
neg_3252	metab_15759	3-[3-(Sulfooxy)phenyl]propanoic acid	C9H10O6S	HMDB0094710	1.68262	245.013	1.21911	0.89815	0.004716	0.01461	neg	4.1084	4.3774	3.8902	4.014	4.0961	3.8448	3.802	3.7376	3.2336	3.6946	3.6925	3.6909
neg_3533	metab_16040	Pyridinoline	C18H28N4O8	HMDB0000851	2.14528	473.191	2.70093	0.531417	0.000614	0.003652	neg	3.4821	4.8562	4.0741	3.3013	3.9007	3.9707	3.1319	1.5517	1.4465	1.504	2.7038	2.1933
neg_3568	metab_16075	7-hydroxy-6-(3-oxobutyl)-2H-chromen-2-one	C13H12O4	HMDB0128959	2.22635	231.067	1.1585	0.915157	0.01822	0.03936	neg	4.6771	4.2075	4.1606	4.2592	4.7268	4.1347	3.9906	4.006	3.8772	3.9557	4.13	3.9895
neg_3634	metab_16141	3-Furanmethanol glucoside	C11H16O7	HMDB0032924	2.29603	305.088	2.79391	0.523081	7.141e-05	0.00134	neg	3.8607	3.0714	3.2728	4.0333	3.6076	3.7317	1.8919	1.9039	1.7968	1.8555	1.9185	1.9169
neg_3716	metab_16223	Hydroxytorsemide	C16H20N4O4S	HMDB0060982	2.40798	345.099	1.08292	0.932837	0.005357	0.01597	neg	4.7687	4.5095	4.5128	4.4538	4.7993	4.3802	4.3057	4.2578	4.1156	4.3668	4.3341	4.2036
neg_3757	metab_16264	(2E)-3-[3-(sulfooxy)phenyl]prop-2-enoic acid	C9H8O6S	HMDB0124975	2.51102	242.997	1.13589	0.916851	0.001277	0.005809	neg	3.9803	4.3037	4.015	4.1381	3.9896	3.9609	3.8727	3.7923	3.4818	3.7302	3.7514	3.7311
neg_3759	metab_16266	Citrubuntin	C15H14O3	HMDB0039146	2.51897	263.068	1.03342	0.93199	0.009408	0.02404	neg	4.5033	4.8524	4.3666	4.6717	4.767	4.5432	4.3471	4.4636	4.0559	4.161	4.3971	4.3903
neg_3820	metab_16327	2-Hydroxybenzaldehyde O-[xylosyl-(1->6)-glucoside]	C18H24O11	HMDB0034157	2.6388	453.084	1.53006	0.846873	0.006676	0.0188	neg	4.7593	3.8268	3.9517	4.2104	4.4028	3.8855	3.324	3.9291	3.415	3.2082	3.7365	3.5893
neg_3857	metab_16364	3-Methylglutaric acid	C6H10O4	-	2.73488	145.05	1.35414	0.924181	9.091e-05	0.001461	neg	5.637	5.7834	5.4571	5.6448	5.7757	5.5706	5.2406	5.2782	5.026	5.1563	5.3065	5.2973
neg_3862	metab_16369	Dyspropterin	C9H11N5O3	HMDB0001195	2.74287	218.069	1.30754	0.881533	0.003538	0.01194	neg	3.5885	3.75	3.6715	4.1811	3.5816	3.6146	3.3935	3.3134	3.166	3.0639	3.4003	3.397
neg_3920	metab_16427	(3R,5Z)-5-Octene-1,3-diol	C8H16O2	LMFA05000556;HMDB0030368	2.87107	189.113	1.13373	0.94234	0.0005149	0.00328	neg	5.369	5.4845	5.2415	5.4478	5.5645	5.3573	5.1099	5.1266	4.9537	5.0081	5.1988	5.1982
neg_3923	metab_16430	2-{[hydroxy(4-methoxy-1-benzofuran-5-yl)methylidene]amino}acetic acid	C12H11NO5	HMDB0129408	2.87107	294.063	1.76241	0.803195	0.005433	0.01613	neg	4.0618	4.1957	3.9577	3.6619	4.9945	3.917	3.4662	3.119	3.2831	2.9598	3.5444	3.5346
neg_3956	metab_16463	Gamma-Glutamyllysine	C11H21N3O5	HMDB0029154	2.935	256.131	1.70371	0.781444	0.01922	0.04104	neg	3.4389	3.6623	4.9078	5.0109	3.7604	4.3123	3.1418	3.1227	2.7598	3.8349	3.3609	3.3879
neg_3988	metab_16495	3-O-Methylglycyrol	C22H20O6	HMDB0033883	3.0225	361.105	1.4671	0.885649	8.745e-05	0.001444	neg	4.2275	4.4224	4.1912	4.4034	4.588	4.295	3.8109	3.9662	3.7772	3.6831	3.963	3.9411
neg_4035	metab_16542	Glycinol	C15H12O5	HMDB0034105	3.13425	317.068	1.09691	0.911905	0.0324	0.06162	neg	4.5428	4.0269	4.0884	3.8793	4.6344	4.0252	3.7902	3.9035	3.7292	3.9043	3.8644	3.7896
neg_4109	metab_16616	2-{[(3,5-dimethoxyphenyl)(hydroxy)methylidene]amino}acetic acid	C11H13NO5	HMDB0131468	3.28617	260.055	1.02569	0.860219	0.04581	0.08062	neg	2.5678	3.1901	2.2338	2.5187	2.8188	2.5505	2.1979	2.21	2.1022	2.7027	2.2247	2.2231
neg_4168	metab_16675	11,13-Dihydrotaraxinic acid glucosyl ester	C21H30O9	HMDB0035867	3.3731	471.19	1.9834	0.793547	0.0006584	0.003789	neg	4.2845	4.4991	4.2797	4.6632	4.5749	4.289	3.4983	3.5715	3.4055	2.9068	3.8378	3.8823
neg_4207	metab_16714	Hydroxytanshinone	C19H18O4	HMDB0036635	3.44492	345.089	1.11163	0.931913	0.01779	0.03863	neg	5.3099	4.9412	4.8769	4.8324	5.3636	4.8166	4.7701	4.6267	4.5801	4.636	4.7666	4.7066
neg_4208	metab_16715	Hydroxygaleon	C20H22O5	HMDB0031535	3.44492	363.121	1.17943	0.918585	0.0006326	0.003708	neg	4.2742	4.389	4.0804	4.1463	4.3059	4.0837	3.8971	3.9498	3.6475	3.8614	3.9216	3.9404
neg_4252	metab_16759	(S)-17-Hydroxy-9,11,13,15-octadecatetraynoic acid	C18H20O3	HMDB0038995	3.5329	305.115	1.49277	0.906657	3.851e-05	0.001044	neg	5.2879	5.5543	5.2641	5.349	5.5401	5.2717	4.8901	4.9051	4.7476	4.764	4.9721	4.9766
neg_4339	metab_16846	P-Cresol glucuronide	C13H16O7	HMDB0011686	3.70897	283.083	1.25143	0.845995	0.02045	0.04308	neg	3.0881	3.6916	3.7383	3.1987	3.2467	3.4097	3.4168	2.7888	2.4458	2.5051	3.1043	2.9759
neg_4358	metab_16865	Hydroxynefazodone	C25H32ClN5O3	HMDB0061040	3.75647	466.2	1.23946	0.900322	0.01194	0.02872	neg	4.4375	5.0592	4.7207	4.8727	4.2621	4.5782	4.5032	4.1035	3.8794	4.0592	4.2723	4.3276
neg_4371	metab_16878	(S)-Verimol F	C17H20O3	HMDB0036558	3.772	317.14	1.19946	0.885875	0.02179	0.04523	neg	3.9508	4.146	3.8321	3.6634	3.9847	3.8717	3.9774	3.0711	3.1569	3.3985	3.4695	3.6974
neg_4379	metab_16886	6-hydroxy-7,8-dimethoxy-2-phenyl-3,4-dihydro-2H-1-benzopyran-4-one	C17H16O5	HMDB0133299	3.7798	345.099	1.26087	0.93517	0.001551	0.006632	neg	6.3207	6.2213	6.0694	5.9889	6.4199	5.999	5.8844	5.7686	5.5427	5.7301	5.8659	5.8298
neg_4402	metab_16909	Wyerol	C15H16O4	HMDB0039142	3.8194	259.098	1.00816	0.941214	0.008055	0.02156	neg	4.8746	4.6992	4.6793	4.7938	4.8574	4.6753	4.7606	4.3906	4.2945	4.3605	4.5609	4.5334
neg_4412	metab_16919	Homoarecoline	C9H15NO2	HMDB0038321	3.84333	214.109	1.57335	0.85434	0.003242	0.0112	neg	4.5243	4.4679	4.046	4.0275	4.8202	4.1041	3.727	3.7886	3.4367	3.5781	3.8418	3.8322
neg_4430	metab_16937	2-phenyl-3,4-dihydro-2H-1-benzopyran-3,5,7-triol	C15H14O4	HMDB0132266	3.87535	303.088	1.40144	0.888622	0.0002403	0.002184	neg	4.2683	4.0602	4.2141	4.0998	4.2704	4.032	3.6847	3.6598	3.4399	3.9194	3.6716	3.7859
neg_4431	metab_16938	N-(1-Deoxy-1-fructosyl)tryptophan	C18H24N2O7	HMDB0037847	3.87535	379.153	1.79006	0.682862	0.006884	0.01922	neg	3.1955	3.0708	3.4376	2.0079	2.7653	3.5532	1.9593	1.9714	1.8641	1.9228	1.986	2.6093
neg_4462	metab_16969	Questiomycin A	C12H8N2O2	HMDB0030483	3.96345	247.029	1.77057	0.796044	0.002279	0.008726	neg	4.5649	4.3226	3.5979	3.7655	4.2891	3.7329	3.4375	3.4552	3.132	3.3492	3.1831	2.7656
neg_4540	metab_17047	1-Phenyl-6,7-dihydroxy-isochroman	C15H14O3	HMDB0029302	4.09742	287.093	1.14351	0.931218	0.001305	0.005889	neg	5.0694	5.2375	5.2325	4.8467	5.0426	5.0162	4.9176	4.7053	4.5367	4.7005	4.7653	4.7275
neg_4556	metab_17063	3-(4-Hydroxyphenyl)-1-(4-hydroxy-2-methoxyphenyl)-2-propen-1-one	C16H14O4	HMDB0037319	4.12913	315.089	1.41379	0.903145	8.186e-05	0.001413	neg	4.8609	4.8567	4.724	4.6176	4.939	4.6189	4.3523	4.3785	4.1122	4.2737	4.3708	4.3594
neg_4615	metab_17122	(R)-2-Hydroxy-7,8-dimethoxy-2H-1,4-benzoxazin-3(4H)-one 2-glucoside	C16H21NO10	HMDB0037262	4.25002	408.095	1.19224	0.922661	0.003255	0.01123	neg	4.6113	4.5804	4.9474	4.441	4.6634	4.53	4.2072	4.321	4.2318	4.2892	4.2992	4.2798
neg_4620	metab_17127	4'-O-Methylequol	C16H16O3	HMDB0041678	4.258	301.109	1.05491	0.955696	0.001023	0.004981	neg	6.2433	6.2083	6.0554	6.0481	6.3302	6.0888	5.949	5.8705	5.7633	5.8729	5.9508	5.9282
neg_4743	metab_17250	6,8-dimethyl-2-phenyl-3,4-dihydro-2H-1-benzopyran-4,5,7-triol	C17H18O4	HMDB0130572	4.48202	267.103	1.17995	0.929513	2.919e-05	0.0009708	neg	4.4601	4.3878	4.4255	4.2898	4.4997	4.3249	4.0564	4.075	4.0042	4.1027	4.1306	4.1569
neg_4788	metab_17295	15-Octadecene-9,11,13-triynoic acid	C18H22O2	LMFA01030559;HMDB0032673	4.56085	307.113	2.19892	0.698159	7.83e-05	0.001398	neg	3.4097	3.7992	3.7155	3.7018	3.8569	3.6838	2.3624	3.0135	2.2665	2.3257	2.6422	2.8622
neg_4874	metab_17381	Didymin	C28H34O14	LMPK12140337;HMDB0029482	4.70777	629.168	2.63443	0.70006	4.241e-06	0.0006625	neg	5.1716	5.0139	4.7987	4.94	5.3179	4.7053	3.5951	3.2808	3.1723	3.2317	3.8458	3.8404
neg_4884	metab_17391	(-)-Wikstromol	C20H22O7	HMDB0030598	4.72322	373.13	1.01501	0.941731	0.002235	0.008625	neg	4.8118	4.9753	4.7834	4.6753	4.6437	4.7351	4.5615	4.428	4.2811	4.5883	4.5448	4.5539
neg_4894	metab_17401	Gibberellin A95	C19H22O5	HMDB0041350	4.73897	375.146	1.31059	0.914551	0.000769	0.004193	neg	4.9689	5.1659	4.7987	4.7623	5.1543	4.9224	4.5123	4.5287	4.3554	4.6295	4.5746	4.6294
neg_4898	metab_17405	3-Hydroxy-2-(4-methylbenzoyl)-4H-1-benzopyran-4-one	C17H12O4	HMDB0031969	4.75488	325.073	1.50048	0.886881	0.0001021	0.001506	neg	4.6718	4.8881	4.7508	4.5102	4.8054	4.5923	4.0998	4.2759	3.8912	4.1841	4.2876	4.2858
neg_4901	metab_17408	3-(2-hydroxyphenyl)-1-(4-methoxyphenyl)propan-1-one	C16H16O3	HMDB0135613	4.76288	237.093	1.49002	0.883753	4.239e-05	0.001068	neg	4.3804	4.5638	4.4382	4.2762	4.5277	4.2914	3.8894	4.0064	3.6539	3.8577	3.9898	4.001
neg_4902	metab_17409	Dodecanedioic acid	C12H22O4	HMDB0000623;LMFA01170009	4.76288	275.151	1.32415	0.923136	8.128e-05	0.001413	neg	5.1117	5.3817	5.1314	5.1693	5.2782	5.0717	4.8175	4.7612	4.6411	4.7661	4.8746	4.8904
neg_4928	metab_17435	2,3-dimethoxy-4-[(2E)-3-phenylprop-2-en-1-yl]phenol	C17H18O3	HMDB0130347	4.81125	315.125	1.08787	0.952062	0.0002824	0.002374	neg	5.9613	6.0864	5.9449	5.9414	5.9721	5.8914	5.67	5.8009	5.4965	5.6958	5.7093	5.7051
neg_4963	metab_17470	Isokobusone	C14H22O2	HMDB0036791	4.87465	259.11	1.8404	0.685375	0.0344	0.0645	neg	3.8482	3.8376	3.2434	2.9333	4.1898	3.6467	1.8244	3.4791	1.3943	1.6114	3.3259	3.2417
neg_4974	metab_17481	3,4,5-trihydroxy-6-(2-hydroxy-1,2-diphenylethoxy)oxane-2-carboxylic acid	C20H22O8	HMDB0135201	4.89018	389.125	1.39247	0.897706	0.0134	0.03118	neg	5.4297	5.4292	4.7793	4.87	5.701	5.1707	4.5875	4.6866	4.6081	4.724	4.7619	4.8027
neg_4996	metab_17503	4'-Methoxychalcone	C16H14O2	HMDB0032585;LMPK12120188	4.93587	283.098	1.11384	0.94682	6.463e-05	0.00128	neg	5.4324	5.3953	5.398	5.2654	5.4754	5.2998	5.1232	5.094	4.9667	5.069	5.1603	5.1371
neg_5006	metab_17513	4-Hydroxycinnamoylagmatine	C14H20N4O2	HMDB0033460	4.94355	257.14	1.28872	0.901695	0.00408	0.0132	neg	4.413	4.5896	4.3236	4.3652	4.519	4.3393	3.989	4.061	3.5628	3.9575	4.2278	4.1407
neg_5057	metab_17564	(2Z)-2-(phenylmethylidene)hept-6-enoic acid	C14H16O2	HMDB0133178	5.01272	197.097	1.09917	0.935583	0.001231	0.005659	neg	4.8927	5.0292	4.8843	4.6457	4.8863	4.8184	4.6572	4.4695	4.3557	4.5261	4.6367	4.6292
neg_5097	metab_17604	Hyaluronan biosynthesis, precursor 1	C14H21NO11	HMDB0060071	5.05755	414.081	1.16502	1.05636	0.0002875	0.002387	neg	5.5044	5.337	5.5105	5.5595	5.3764	5.6114	5.7349	5.8454	5.8593	5.8205	5.7386	5.7523
neg_5103	metab_17610	4-Nitrophenol	C6H5NO3	HMDB0062627;HMDB0001232	5.07277	138.019	1.0773	1.08394	0.02254	0.04641	neg	4.4785	4.2224	4.4699	4.7529	3.9732	4.5485	4.7744	4.5838	4.9143	4.9833	4.5358	4.8745
neg_5142	metab_17649	2-(2-Phenylacetoxy)propionylglycine	C13H15NO5	HMDB0059732	5.11323	264.089	1.89202	0.763776	0.006043	0.01744	neg	4.0144	4.0551	3.8694	3.4695	5.086	3.7897	3.0967	3.1243	2.706	2.8501	3.4133	3.3561
neg_5170	metab_17677	6-Epi-7-isocucurbic acid glucoside	C18H30O8	HMDB0029782	5.16067	395.172	1.23737	0.932747	0.00233	0.008864	neg	5.9116	6.2375	5.7842	6.0693	6.1906	5.9363	5.6589	5.739	5.3572	5.4521	5.7314	5.7643
neg_5219	metab_17726	Pyrrhoxanthinol	C37H46O5	HMDB0035696	5.26097	607.28	2.05797	0.809111	1.181e-05	0.0007591	neg	4.8748	5.1515	4.8638	4.8607	5.1545	4.8633	4.2008	4.0357	3.7252	3.7652	4.2165	4.1411
neg_5226	metab_17733	3-Hydroxyisovalerylcarnitine	C12H24NO5+	HMDB0061189;LMFA07070041	5.27017	297.134	1.09556	0.921724	0.005303	0.01585	neg	3.9847	4.2279	3.76	4.0481	4.2299	3.9728	3.7777	3.7198	3.5798	3.6622	3.7803	3.8039
neg_5228	metab_17735	Gingerol	C17H26O4	HMDB0005783	5.27017	339.182	1.16244	0.934244	0.0003913	0.00279	neg	4.7629	4.8716	4.6182	4.7187	4.9138	4.6757	4.4757	4.4133	4.3506	4.4122	4.5062	4.5219
neg_5262	metab_17769	Trans-Grandmarin	C15H16O6	HMDB0039030	5.31863	583.185	1.44459	0.885738	0.001251	0.005716	neg	4.7581	4.9951	4.5201	4.557	5.0338	4.7011	4.3086	4.181	3.8223	4.3943	4.2347	4.3594
neg_5270	metab_17777	Purpurin	C14H8O5	LMPK12140007	5.33495	255.031	1.63634	0.789354	0.01217	0.02911	neg	3.6562	4.5526	4.1989	4.0241	3.6675	3.6851	3.6776	3.3858	2.124	3.2846	3.3059	2.9936
neg_5281	metab_17788	1,2,3,4-Tetrahydro-b-carboline-1,3-dicarboxylic acid	C13H12N2O4	HMDB0032102	5.35935	259.073	1.70496	0.80937	0.001982	0.007914	neg	3.9085	3.9921	3.896	3.7043	4.726	3.9769	3.2225	3.5192	2.8793	3.0322	3.4804	3.4549
neg_5363	metab_17870	15(R)-hydroperoxy-EPE	C8H18N2O4S	HMDB0062295	5.54457	283.098	1.51966	0.872883	3.677e-05	0.001037	neg	4.0648	4.0492	3.9482	3.9965	4.3389	4.0543	3.4729	3.3843	3.6461	3.6478	3.5353	3.6586
neg_5369	metab_17876	Canesceol	C29H44O11	HMDB0034084	5.55228	589.269	1.63128	0.882657	7.492e-05	0.001367	neg	5.1569	5.3994	5.1226	5.1759	5.3345	5.1565	4.704	4.7089	4.4069	4.358	4.7376	4.7481
neg_5386	metab_17893	Aerobactin	C22H36N4O13	HMDB0004051	5.55997	599.2	1.39416	0.91769	4.072e-05	0.001053	neg	5.267	5.2205	5.2066	5.1238	5.2752	5.1779	4.5857	4.8188	4.7492	4.7858	4.8588	4.8968
neg_5405	metab_17912	7,12-Dihydroxy-3,11,15,23-tetraoxolanost-8-en-26-oic acid	C30H42O8	HMDB0033023	5.59897	575.29	1.64762	0.813408	0.03207	0.06117	neg	4.6079	5.6239	5.2272	5.2272	4.4228	5.0502	4.971	3.8142	2.7576	4.0267	4.536	4.4302
neg_5434	metab_17941	Ascochitine	C15H16O5	HMDB0030145	5.6556	311.069	1.25511	0.851874	0.02311	0.0473	neg	3.1274	3.4383	3.4135	3.2622	3.2817	3.3239	3.2459	2.5558	2.2028	2.8755	3.0393	2.9878
neg_5469	metab_17976	5b-Cyprinol sulfate	C27H48O8S	HMDB0006888	5.72075	577.305	1.36275	0.864109	0.02432	0.04933	neg	5.1556	4.3015	3.9751	4.9473	4.4232	4.8793	3.6353	4.1017	3.7716	4.6176	4.0264	3.7675
neg_5500	metab_18007	Trans-Dec-2-enoic acid	C10H18O2	HMDB0010726	5.76982	215.129	1.27843	0.920717	0.0007311	0.004059	neg	4.95	5.2569	4.8775	4.9664	5.1762	4.8929	4.686	4.621	4.436	4.536	4.7382	4.7162
neg_5502	metab_18009	5-Hydroxy-3-(4-hydroxybenzyl)-7,8-dimethoxy-4-chromanone	C18H18O6	HMDB0037253	5.76982	351.086	1.06358	0.942296	0.0006048	0.003616	neg	4.8161	4.868	4.8393	4.971	4.9125	4.9173	4.7194	4.6616	4.4345	4.51	4.6638	4.6412
neg_5536	metab_18043	3-Indolebutyric acid	C12H13NO2	HMDB0002096	5.80963	238.064	1.76762	0.782698	0.01317	0.03081	neg	3.8466	3.5206	3.8621	3.5141	5.0023	3.5605	2.945	2.616	3.2512	2.9544	3.3076	3.1687
neg_5569	metab_18076	5,6-Dihydroxyprostaglandin F1a	C20H36O7	HMDB0012109	5.82523	387.24	1.44899	0.906184	0.0001211	0.001618	neg	5.1764	5.3591	5.0212	5.1134	5.3864	5.0922	4.7814	4.6826	4.5207	4.6058	4.825	4.8082
neg_5593	metab_18100	(3-phenylpropoxy)sulfonic acid	C9H12O4S	HMDB0135313	5.84983	215.038	1.11662	1.12173	0.04069	0.07343	neg	3.7987	3.3669	3.6777	3.2718	2.957	3.7799	3.6345	3.6457	3.7469	4.3743	4.0295	3.9576
neg_5596	metab_18103	Mesuagin	C24H22O5	LMPK12100030;HMDB0035876	5.84983	435.146	1.32029	0.864787	0.01879	0.04033	neg	4.5371	3.3934	4.321	4.0687	4.3508	4.2255	3.3463	3.7627	3.2956	3.8937	3.4622	3.7693
neg_5643	metab_18150	Sulfamethoxazole N4-hydroxylamine	C10H11N3O4S	HMDB0013852	5.88805	314.044	1.00751	1.06805	0.03661	0.06752	neg	4.5827	4.6052	4.8331	4.4751	4.0356	4.626	4.8306	4.8046	4.8233	4.9106	4.8504	4.784
neg_5657	metab_18164	Lettucenin A	C15H12O3	HMDB0036738	5.90357	277.028	1.82304	0.774495	0.003854	0.01268	neg	4.2015	3.8441	3.8848	3.9834	4.1043	3.7438	3.5517	3.3628	2.2562	3.3126	3.0215	2.8964
neg_5678	metab_18185	Desglucocheirotoxin	C29H42O10	HMDB0034362	5.91913	571.256	1.32218	0.910619	0.002539	0.009411	neg	4.9817	5.3267	4.7338	5.1112	5.257	4.9296	4.7396	4.6534	4.389	4.4478	4.7117	4.686
neg_5692	metab_18199	6-Hydroxyenterolactone	C18H18O5	HMDB0041700	5.93483	313.109	1.4875	0.918499	9.664e-06	0.0007411	neg	6.1954	5.9979	6.0837	5.9655	6.0989	5.9525	5.6252	5.5287	5.3695	5.513	5.6698	5.6316
neg_5724	metab_18231	Naphthoherniarin	C22H16O6	HMDB0039025	5.95818	411.065	2.06478	0.799099	9.949e-06	0.0007411	neg	4.9366	4.7264	4.5035	4.5564	4.8282	4.4034	3.9538	3.7288	3.6152	3.6767	3.7337	3.6316
neg_5761	metab_18268	Cystathionine sulfoxide	C7H14N2O5S	HMDB0002399	5.98925	275.013	1.34113	0.893641	0.001828	0.007451	neg	4.7299	4.296	4.4479	4.5814	4.7173	4.3072	4.2866	4.1559	3.8965	4.1933	3.8561	3.8112
neg_5788	metab_18295	13-Hydroxy-9-methoxy-10-oxo-11-octadecenoic acid	C19H34O5	HMDB0040901	6.00465	387.24	1.19151	0.937091	0.001519	0.006545	neg	5.7803	6.0352	5.6175	5.7147	5.9456	5.7197	5.5343	5.4258	5.2011	5.3968	5.5135	5.5513
neg_5800	metab_18307	Glycerophospho-N-Palmitoyl Ethanolamine	C21H44NO7P	-	6.01227	452.28	1.33448	0.92316	0.0007944	0.004267	neg	5.6265	5.5734	5.4847	5.6205	5.5556	5.3233	5.2445	5.0546	4.8479	5.0669	5.0725	5.3469
neg_5835	metab_18342	Crustecdysone	C27H44O7	HMDB0030180	6.0352	479.303	1.5799	0.898251	6.494e-05	0.001281	neg	5.5239	5.8828	5.5926	5.503	5.8514	5.6123	5.1346	5.0587	4.9004	5.024	5.1973	5.1943
neg_5843	metab_18350	Glutethimide	C13H15NO2	HMDB0015505	6.04285	262.109	1.80318	0.74294	0.02765	0.05451	neg	4.1233	3.8196	3.2207	2.9288	5.1361	3.5068	2.7257	2.8858	2.6274	2.7691	3.1328	2.749
neg_5868	metab_18375	Corchorifatty acid D	C18H28O4	HMDB0033243	6.05817	307.192	1.02423	0.962063	8.335e-05	0.001425	neg	6.4109	6.5549	6.3957	6.4278	6.5192	6.4402	6.2331	6.2113	6.1155	6.1509	6.2798	6.2882
neg_5895	metab_18402	Z-Clausenamide	C18H17NO2	HMDB0038621	6.07347	314.096	1.14794	1.08683	0.01464	0.03324	neg	4.5955	4.0726	4.1974	3.8708	4.0153	4.26	4.5356	4.6588	4.5753	4.5146	4.5126	4.3895
neg_5915	metab_18422	Allixin	C12H18O4	HMDB0040705	6.09625	207.102	1.0423	1.05394	0.000756	0.004145	neg	4.6541	4.5424	4.7528	4.74	4.5719	4.7682	4.9072	4.9364	4.9976	4.9197	4.892	4.8899
neg_5922	metab_18429	Hovenine A	C27H42N4O4	HMDB0030200	6.09625	467.302	1.14846	0.941955	0.0008576	0.004462	neg	5.6378	5.8585	5.6044	5.5799	5.7762	5.5532	5.447	5.307	5.1286	5.3076	5.3952	5.4516
neg_5951	metab_18458	Tsibulin 2	C11H18O2	HMDB0037388	6.119	163.112	1.1961	0.849199	0.0495	0.08567	neg	3.5851	2.9615	4.1662	2.8201	3.5481	3.5282	2.9028	2.917	3.0374	2.4813	3.0726	3.0894
neg_5986	metab_18493	MG(0:0/20:3(8Z,11Z,14Z)/0:0)	C23H40O4	HMDB0011547	6.14197	425.292	1.3042	0.921013	0.0002043	0.002024	neg	5.2416	5.4716	5.2252	5.0672	5.3134	5.2036	4.9123	4.898	4.6559	4.7294	4.9168	4.9235
neg_6063	metab_18570	2-(2,6-dihydroxy-3,4-dimethoxycyclohexylidene)acetonitrile	C10H15NO4	HMDB0125517	6.21117	194.082	1.01641	1.04282	7.83e-06	0.0007062	neg	5.3076	5.272	5.33	5.3661	5.2805	5.3957	5.5385	5.5519	5.6344	5.5676	5.5144	5.5122
neg_6534	metab_19041	Ascorbyl palmitate	C22H38O7	LMFA07010788;HMDB0039883	6.73865	435.235	1.21554	1.09796	0.01958	0.04167	neg	4.3149	3.8842	4.4365	4.4971	3.8833	4.5856	4.5161	4.7933	4.5425	4.8147	4.716	4.7269
neg_8091	metab_20591	DG(10:0/16:0/0:0)	C29H56O5	HMDB0092983	7.1166	483.407	1.62071	1.21752	0.03259	0.06193	neg	3.1087	3.1179	4.2237	4.8577	4.0141	4.5117	4.324	4.5288	5.0243	5.2201	4.9625	4.9559
neg_8096	metab_20596	Manglupenone	C30H44O2	HMDB0030395	7.10892	473.284	1.01421	1.05257	0.003295	0.01133	neg	5.4904	5.5696	5.6302	5.7511	5.324	5.4537	5.7696	5.7661	5.9989	5.8857	5.7652	5.778
neg_8465	metab_20965	N-Palmitoyl phenylalanine	C25H41NO3	HMDB0062339;LMFA08020091	6.64648	402.302	1.44313	1.16311	0.01477	0.03347	neg	3.7138	3.3596	4.5775	4.2355	3.6786	3.7551	4.3098	4.5241	4.2526	4.7153	4.711	4.6137
neg_8715	metab_21215	(5alpha,8beta,9beta)-5,9-Epoxy-3,6-megastigmadien-8-ol	C13H20O2	HMDB0034672	6.40197	415.282	1.39915	0.900799	0.006926	0.0193	neg	5.6238	5.597	5.4097	6.2038	5.4695	5.508	5.1593	5.2469	4.5095	5.1155	5.2434	5.1827
neg_8742	metab_21242	N-Carbamoyl glucuronide lorcaserin	C21H28ClNO5	HMDB0061159	6.37917	454.167	1.85258	0.816999	0.003036	0.01069	neg	5.2554	5.1597	5.2318	4.6938	5.138	4.9488	4.5557	4.6338	3.5492	3.6087	4.1684	4.3418
neg_8745	metab_21245	Sterebin G	C20H34O5	HMDB0035380	6.37917	335.221	1.43592	0.900309	0.00665	0.01875	neg	6.2495	6.2438	6.2265	5.7621	6.2828	6.1283	5.8776	5.93	5.095	5.1245	5.6134	5.5747
neg_8831	metab_21331	PGA3	C20H28O4	LMFA03010140	6.31837	331.192	1.36543	0.89924	0.0009556	0.004775	neg	4.4986	4.9013	4.531	4.5916	4.6958	4.4091	4.235	4.2524	4.0122	3.8441	4.253	4.2512
neg_8967	metab_21467	Sphingosine 1-phosphate (d16:1-P)	C16H34NO5P	HMDB0060061	6.22648	396.216	1.09521	0.928102	0.02944	0.0573	neg	5.4395	6.2439	5.6959	6.0199	5.4617	5.8546	5.2458	5.4855	4.938	5.5418	5.4775	5.5311
neg_9172	metab_21672	Momorcharaside B	C36H62O10	HMDB0032941	6.1037	653.429	1.17912	0.942452	0.0006379	0.003724	neg	5.9545	6.2175	5.9194	5.8991	6.0792	5.9008	5.7707	5.622	5.4622	5.5931	5.7172	5.7372
neg_9212	metab_21712	19-Hydroxyandrost-4-ene-3,17-dione	C19H26O3	LMST02020067;HMDB0003955	6.08865	347.187	1.29901	0.929738	2.352e-05	0.0009059	neg	5.4215	5.5653	5.3606	5.4408	5.5451	5.3738	5.1157	5.1087	4.9145	4.9936	5.1408	5.1364
neg_9283	metab_21783	13,14-dihydro-19(R)-hydroxyPGE1	C20H36O6	-	6.05817	371.245	1.3744	0.929038	9.726e-05	0.001483	neg	6.1137	6.2951	5.9912	6.0485	6.2889	6.0433	5.757	5.6767	5.5469	5.628	5.7627	5.7996
neg_9286	metab_21786	Ipomeatetrahydrofuran	C15H28O3	HMDB0040904	6.05817	301.203	1.01556	0.955752	0.004939	0.01506	neg	6.4799	6.7102	6.4427	6.3961	6.7844	6.5087	6.3115	6.3103	6.045	6.2598	6.3231	6.337
neg_9295	metab_21795	10,11-dihydro-20-trihydroxy-leukotriene B4	C20H34O7	LMFA03020044;HMDB0012503	6.0505	385.224	1.13721	0.943863	0.0008479	0.004433	neg	5.6872	5.9154	5.6352	5.6694	5.8535	5.6554	5.4759	5.4083	5.2221	5.3301	5.5214	5.5255
neg_9458	metab_21958	Pregnanediol-3-glucuronide	C27H44O8	HMDB0010318;LMST05010049	5.97377	477.288	1.72724	0.870177	2.386e-05	0.0009059	neg	5.1636	5.435	5.159	5.151	5.4714	5.1831	4.5659	4.7248	4.384	4.3671	4.7276	4.6978
neg_9498	metab_21998	APC	C33H38N4O8	HMDB0060661	5.9504	617.264	1.64416	0.862573	0.003716	0.01236	neg	5.2151	5.9613	5.6616	5.5821	5.0787	5.3348	5.2609	4.5989	4.1974	4.5248	4.9057	4.8306
neg_9548	metab_22048	Oxyacanthine	C37H40N2O6	HMDB0030172	5.91913	589.269	1.74223	0.872476	0.0001757	0.001899	neg	5.5235	5.9871	5.6569	5.5719	5.6387	5.4985	5.2053	4.8873	4.6073	4.7074	5.1074	5.0386
neg_9649	metab_22149	Phenethylamine glucuronide	C14H19NO6	HMDB0010323	5.85752	278.104	1.73365	0.806267	0.01127	0.02747	neg	4.4197	4.5512	4.3666	3.9074	5.6058	4.3416	3.7604	3.8298	3.1072	3.4113	3.8639	3.9503
neg_9650	metab_22150	N-[1-(4-methoxy-6-oxopyran-2-yl)-2-methylbutyl]acetamide	C13H19NO4	-	5.85752	234.114	2.11482	0.681968	0.007967	0.02138	neg	3.9604	4.0494	3.8935	2.8156	5.165	3.7717	2.9601	2.332	2.268	2.1791	3.0815	3.3126
neg_9685	metab_22185	Avenanthramide 1f	C17H15NO5	HMDB0029283	5.82523	312.089	2.21739	0.665039	0.004165	0.01337	neg	3.7573	3.6739	3.4462	3.2545	4.9053	3.0843	2.3459	1.9827	2.4157	1.9704	2.9452	3.0511
neg_9715	metab_22215	Ganoderic acid theta	C30H42O8	HMDB0036310	5.80963	575.29	1.0324	0.927409	0.02844	0.05574	neg	5.0252	5.5519	4.8835	5.162	5.5183	5.1862	5.0782	5.1403	4.4971	4.6548	4.88	4.803
neg_9720	metab_22220	Melanettin	C16H12O5	HMDB0041758	5.80963	319.039	1.23965	0.923903	0.003176	0.01104	neg	5.7807	5.7731	5.7769	5.8546	5.2848	5.5889	5.4888	5.3427	4.9951	5.2837	5.1952	5.1625
neg_9767	metab_22267	2-[4-(3-Hydroxypropyl)-2-methoxyphenoxy]-1,3-propanediol 1-glucoside	C19H30O10	HMDB0040353	5.76075	463.178	1.72001	0.875022	0.0003796	0.002751	neg	5.744	5.0861	5.6473	5.7727	5.6045	5.5579	4.5974	4.7233	5.1566	4.8675	4.9578	4.9338
neg_9770	metab_22270	Glycyrol	C21H18O6	HMDB0033882;LMPK12090044	5.76075	347.09	1.42125	0.902197	9.525e-05	0.001478	neg	4.6432	4.9132	4.6974	4.7777	4.7812	4.5905	4.3688	4.2608	4.0895	4.1231	4.3955	4.3869
neg_9789	metab_22289	Fluorometholone	C22H29FO4	HMDB0014469	5.73672	421.204	1.27077	0.912846	0.001695	0.007058	neg	4.6182	4.3064	4.6772	4.873	4.6707	4.5965	4.0195	4.202	4.1423	4.3241	4.3345	4.3018
neg_9791	metab_22291	Artabsinolide D	C15H22O5	HMDB0034941	5.73672	263.13	1.1394	0.916276	0.003717	0.01236	neg	3.9565	4.1151	3.8148	4.1525	4.2912	3.9665	3.7129	3.7349	3.5606	3.5415	3.8607	3.851
neg_9835	metab_22335	MG(0:0/14:1(9Z)/0:0)	C17H32O4	HMDB0011531	5.66362	345.229	1.27231	0.932399	0.002082	0.008174	neg	5.9901	6.3016	5.7831	6.0106	6.2729	6.0305	5.5062	5.7668	5.6112	5.5755	5.7319	5.7405
neg_9900	metab_22400	3,4-Dihydroxyphenylpropanoate	C9H10O4	-	5.56763	181.05	1.24533	0.931572	0.0001014	0.001506	neg	5.2852	5.3136	5.2609	5.1624	5.3834	5.1609	5.0068	4.9174	4.7744	4.758	4.9754	4.972
neg_10030	metab_22530	Cotinine glucuronide	C16H20N2O7	HMDB0001013	5.37555	333.11	1.51854	0.900135	1.3e-05	0.0007751	neg	5.1099	5.3514	5.0658	5.1526	5.2962	5.0865	4.6644	4.7275	4.5239	4.5383	4.7516	4.7552
neg_10061	metab_22561	3,4-Methyleneazelaic acid	C11H16O4	HMDB0059744	5.32677	211.098	1.13267	0.92847	0.0003001	0.002434	neg	4.2286	4.3956	4.0848	4.2366	4.228	4.1583	3.9306	3.9057	3.8251	3.8212	4.0123	4.0236
neg_10072	metab_22572	2-hydroxy-3,4-diphenylpentanedioic acid	C17H16O5	HMDB0134815	5.30235	299.094	1.15325	0.940256	0.001188	0.005514	neg	5.2878	5.2014	5.2243	5.2443	5.3185	5.1568	5.1173	4.7616	4.9126	4.7956	4.9797	4.9883
neg_10077	metab_22577	Carissanol	C20H24O7	HMDB0030081	5.29427	375.146	1.62097	0.850031	0.008576	0.02251	neg	4.9306	5.0975	4.402	4.1428	5.3026	4.8074	3.9054	3.9949	3.9376	4.1574	4.1646	4.2262
neg_10093	metab_22593	Alanyl-Asparagine	C7H13N3O4	HMDB0028682	5.27817	405.172	1.71742	0.88222	0.000208	0.002044	neg	6.0161	5.449	5.6117	5.8119	6.0165	5.684	5.0066	5.0085	4.8869	5.0852	5.2606	5.2677
neg_10099	metab_22599	Fludrocortisone	C21H29FO5	LMST02030103;HMDB0014825	5.27017	361.182	2.05744	0.768325	0.001177	0.005476	neg	4.8918	3.7964	4.3408	4.6343	4.8811	4.4673	3.0146	3.3028	3.1634	3.3838	3.94	3.9487
neg_10129	metab_22629	Physagulin F	C30H40O9	HMDB0039631	5.21323	589.269	1.45857	0.921644	5.04e-05	0.001152	neg	6.0237	6.0522	5.9483	6.009	6.0903	5.9432	5.6398	5.5347	5.4302	5.3597	5.6389	5.6355
neg_10164	metab_22664	8-Deoxy-11,13-dihydroxygrosheimin	C15H20O5	HMDB0041144	5.17523	605.263	2.71681	0.675634	0.0002008	0.002005	neg	5.1926	5.5462	5.174	5.0493	5.5093	4.9747	4.1887	3.5409	2.9188	2.9101	3.7131	3.9733
neg_10222	metab_22722	Osmundalin	C12H18O8	HMDB0031304	5.09602	325.071	1.23809	0.924512	3.375e-05	0.001008	neg	4.8015	4.8271	4.7954	4.6246	4.84	4.728	4.4701	4.4819	4.2431	4.3565	4.4469	4.4575
neg_10308	metab_22808	Cis-3-Hexenyl phenylacetate	C14H18O2	HMDB0038281	5.02763	199.112	1.08177	0.927366	0.002582	0.009532	neg	4.6234	4.6087	4.4136	4.3847	4.4829	4.5	4.1326	4.4205	3.9737	4.2542	4.2282	4.0435
neg_10366	metab_22866	3-Methoxybenzenepropanoic acid	C10H12O3	HMDB0011751	4.95895	179.071	1.13347	0.944215	5.993e-05	0.001247	neg	5.4285	5.2958	5.335	5.2159	5.4076	5.2631	4.9632	5.069	4.9147	5.0781	5.0705	5.0676
neg_10407	metab_22907	(R)-Bitalin A	C13H14O3	HMDB0040358	4.93587	199.076	1.05236	0.956823	3.349e-05	0.001007	neg	5.8222	5.7474	5.8012	5.6861	5.8429	5.6999	5.534	5.5131	5.4355	5.5128	5.567	5.5448
neg_10442	metab_22942	Blumealactone C	C17H24O6	HMDB0035357	4.89018	345.135	1.602	0.853304	0.007422	0.0203	neg	4.8112	4.8334	4.1395	4.1827	5.1242	4.5976	3.8483	3.9582	3.8472	4.0093	4.0111	3.9519
neg_10452	metab_22952	Nicotine glucuronide	C16H22N2O6	HMDB0001272	4.87465	359.126	1.07215	0.9176	0.02512	0.05056	neg	4.4361	4.4706	5.0012	4.3825	4.1186	4.3868	4.0635	4.1994	3.9022	4.1003	4.1505	4.1693
neg_10455	metab_22955	Sandoricin	C31H40O11	HMDB0037555	4.86668	633.259	1.83973	0.782841	0.01139	0.02769	neg	4.6193	5.3106	4.7328	4.9641	3.8299	4.5858	4.4943	2.9736	2.8651	3.8761	3.9259	3.8182
neg_10479	metab_22979	NORSTICTIC ACID	C18H12O9	-	4.8429	371.042	1.29881	0.906256	0.002715	0.009867	neg	5.0089	5.2005	4.9199	4.8057	4.6612	4.8464	4.6378	4.4066	4.0496	4.4312	4.5588	4.5951
neg_10486	metab_22986	L-cis-Cyclo(aspartylphenylalanyl)	C13H14N2O4	HMDB0031360	4.835	307.096	1.52987	0.891414	1.55e-06	0.0005961	neg	4.741	4.835	4.7156	4.6448	4.8681	4.7066	4.3321	4.1995	4.1124	4.1545	4.311	4.3049
neg_10555	metab_23055	2-(4-Methoxyphenyl)naphthalic anhydride	C19H12O4	HMDB0032909	4.72322	349.07	1.22764	0.925521	0.0007885	0.00425	neg	4.805	4.7508	4.7604	4.7269	4.7442	4.7311	4.477	4.4383	4.1967	4.286	4.5037	4.4908
neg_10673	metab_23173	3,4-Dihydro-8-hydroxy-3-(3-hydroxy-4-methoxyphenyl)-1H-2-benzopyran-1-one	C16H14O5	HMDB0030807	4.60712	331.082	1.264	0.865747	0.02219	0.04583	neg	4.1188	4.2262	4.0409	4.0772	3.5428	3.9027	3.7846	3.5938	2.7133	3.6168	3.7046	3.2898
neg_10710	metab_23210	3-Hydroxytetradecanedioic acid	C14H26O5	HMDB0000394	4.5686	319.177	1.44808	0.911025	4.551e-05	0.001105	neg	5.2931	5.6191	5.3044	5.4298	5.4544	5.3357	4.9452	4.9576	4.7736	4.7879	5.0314	5.057
neg_10724	metab_23224	5-Pentyltetrahydro-2-oxo-3-furancarboxylic acid	C10H16O4	HMDB0030989	4.5531	245.103	1.23227	0.920788	0.0002327	0.002148	neg	4.4325	4.5118	4.3731	4.4661	4.6697	4.3587	4.1047	4.1093	3.9559	4.0627	4.2266	4.2324
neg_10782	metab_23282	Equol	C15H14O3	HMDB0002209;LMPK12080003	4.47405	287.094	1.1565	0.910621	0.03127	0.05996	neg	5.2864	5.2828	5.2012	4.9391	5.3421	4.9609	4.9204	5.1869	4.0415	4.6043	4.7669	4.7224
neg_10790	metab_23290	12-Oxo-20-trihydroxy-leukotriene B4	C20H30O7	HMDB0012553;LMFA03020050	4.45807	381.193	1.15922	0.923578	0.009803	0.02476	neg	4.9624	5.3342	4.6873	5.1508	5.2693	4.9801	4.6886	4.8343	4.4564	4.4877	4.7839	4.8124
neg_10792	metab_23292	Pratenol A	C14H12O5	HMDB0040630	4.45807	259.062	1.2565	0.908511	0.001218	0.005611	neg	4.298	4.0358	4.1948	4.1651	4.5265	4.1583	3.7839	3.8792	3.8158	3.6729	3.9792	3.9265
neg_10833	metab_23333	Senecioic acid	C5H8O2	HMDB0000509	4.40203	299.151	1.32104	0.889334	0.001661	0.006953	neg	3.9346	4.0819	3.7998	3.9212	4.3563	3.8723	3.6133	3.6183	3.3401	3.4142	3.6834	3.644
neg_10851	metab_23351	Achillicin	C17H22O5	HMDB0036487	4.36997	343.095	1.61832	0.814578	0.01084	0.0267	neg	3.9004	4.035	3.9224	3.7936	3.9594	3.8504	3.6054	3.1098	2.4015	2.9982	3.4207	3.5769
neg_10899	metab_23399	Cis-3-Hexenyl lactate	C9H16O3	HMDB0036213	4.31398	217.108	1.17343	0.891007	0.009688	0.02455	neg	3.6518	4.0055	3.6109	3.6338	3.8435	3.6045	3.4134	3.4582	2.8222	3.3008	3.4773	3.4451
neg_10909	metab_23409	(2RS,5RS)-(E)-2-(2-Phenylethenyl)-1,3-dioxan-5-ol	C12H14O3	HMDB0031973	4.29798	187.076	1.35749	0.907441	0.0001659	0.001858	neg	4.5678	4.494	4.4076	4.3327	4.6378	4.3297	3.9935	4.0645	3.9745	4.0654	4.1396	4.0593
neg_10956	metab_23456	1-Hydroxypropan-2-yl 2-isopropyl-5-methylcyclohexyl carbonate	C14H26O4	HMDB0059947	4.21792	303.182	1.11256	0.93547	0.0005797	0.003531	neg	4.6715	4.8691	4.5849	4.6606	4.8382	4.6427	4.4028	4.4856	4.2864	4.3013	4.4819	4.485
neg_10999	metab_23499	P-Tolyl phenylacetate	C15H14O2	HMDB0041564	4.1372	271.099	1.28594	0.919798	4.587e-05	0.001106	neg	4.7918	4.854	4.7763	4.6038	4.8727	4.6819	4.4957	4.3527	4.242	4.3502	4.4346	4.4092
neg_11004	metab_23504	15-deoxy-delta-12,14-PGJ2	C20H28O3	LMFA03010021	4.12913	315.194	1.55737	0.788618	0.004918	0.01503	neg	2.9979	3.032	2.8193	2.9827	3.0603	2.818	2.3792	2.6224	2.137	1.7457	2.6097	2.4724
neg_11098	metab_23598	3-(3,4-Dihydroxybenzyl)-7-hydroxy-5-methoxy-4-chromanone	C17H16O6	HMDB0033298	4.01145	361.095	1.38422	0.905155	0.005006	0.01522	neg	5.7722	5.8122	5.2529	5.4423	5.7629	5.3615	5.1397	5.11	4.501	5.1016	5.2085	5.1703
neg_11148	metab_23648	3-Oxo-carbofuran	C12H13NO4	HMDB0032776	3.92357	234.078	1.37127	0.856809	0.02237	0.04614	neg	3.971	3.8219	3.5251	3.5943	4.644	3.5741	3.3934	3.3815	3.1149	3.053	3.3748	3.4978
neg_11165	metab_23665	3-Hydroxybenzaldehyde	C7H6O2	-	3.8914	243.067	1.34972	0.894699	0.0003372	0.002599	neg	4.2004	4.5	4.1492	4.0569	4.3168	4.1328	3.8677	3.8131	3.5671	3.8522	3.8067	3.777
neg_11172	metab_23672	5,7-Dihydroxy-4'-methoxy-8-methylflavanone	C17H16O5	HMDB0041321;LMPK12140352	3.86733	345.099	1.23856	0.943992	5.71e-05	0.001217	neg	6.3073	6.3545	6.2598	6.1725	6.3545	6.1548	5.9817	5.8854	5.7415	5.9239	5.993	5.9705
neg_11183	metab_23683	Crocin 3	C32H44O14	HMDB0039121	3.84333	651.27	1.1562	0.909344	0.04693	0.08214	neg	5.0747	5.7829	5.5494	5.4553	5.0671	5.4352	5.2799	4.8721	4.3226	4.4441	5.243	5.2705
neg_11194	metab_23694	3,5,7-trihydroxy-2-(1-hydroxy-3-methoxy-4-oxocyclohexyl)-4H-chromen-4-one	C16H16O8	HMDB0126514	3.83535	317.068	1.19367	0.93036	6.891e-05	0.001317	neg	4.768	4.8105	4.8022	4.6338	4.8506	4.6556	4.5219	4.3685	4.2737	4.4734	4.458	4.4348
neg_11232	metab_23732	Simulenoline	C20H23NO3	HMDB0031997	3.7798	306.147	1.95684	0.745839	0.001421	0.006263	neg	4.034	4.1178	3.5505	3.73	4.6676	4.0475	3.2333	3.3883	2.3598	2.5747	3.188	3.2687
neg_11241	metab_23741	Norelgestromin	C21H29NO2	HMDB0015658	3.772	372.215	1.758	0.790748	0.004209	0.01348	neg	3.8749	4.7807	3.9195	4.147	4.0709	3.9784	4.0137	3.1766	2.6787	2.9812	3.3636	3.3741
neg_11262	metab_23762	3,3-Dimethylglutaric acid	C7H12O4	HMDB0002441	3.76422	159.066	1.54193	0.912108	5.052e-05	0.001154	neg	6.1504	6.2031	5.8337	6.0754	6.2396	6.0225	5.5174	5.5978	5.4217	5.4726	5.6514	5.6502
neg_11272	metab_23772	Vanillylamine	C8H11NO2	HMDB0012309	3.75647	152.071	1.08372	0.925203	0.0005074	0.003258	neg	3.8782	4.0353	3.9387	4.0509	3.8449	3.9151	3.7535	3.7168	3.4795	3.5458	3.6756	3.7249
neg_11273	metab_23773	Biotripyrrin-a	C25H27N3O6	HMDB0003323	3.74867	510.19	1.30318	0.89998	0.005465	0.0162	neg	4.6683	5.2951	4.9353	5.0812	4.5761	4.8383	4.6951	4.4422	4.0777	4.3264	4.4411	4.473
neg_11294	metab_23794	Trans-2-trans-4-Heptadien-1-ol	C7H12O	HMDB0032301;LMFA05000701	3.70097	157.086	1.15993	0.930297	0.0001187	0.001609	neg	4.3305	4.4274	4.2318	4.3251	4.4828	4.2829	4.027	4.031	3.9821	4.0025	4.1205	4.1017
neg_11314	metab_23814	HAEMATOMMIC ACID	C9H8O5	-	3.66888	195.03	1.06729	0.919379	0.03031	0.05856	neg	4.6762	4.9938	4.5408	4.5859	4.8146	4.5936	4.5114	4.3422	3.7113	4.3877	4.5017	4.4781
neg_11337	metab_23837	2-Aminomuconic acid	C6H7NO4	HMDB0001241	3.63697	202.036	1.21675	0.890324	0.02193	0.04544	neg	3.9771	3.904	3.8303	3.6121	4.5713	3.792	3.5662	3.4386	3.6833	3.2984	3.5735	3.5315
neg_11343	metab_23843	Cis-Resveratrol 3-sulfate	C14H12O6S	HMDB0041712	3.62097	353.035	2.01963	0.761882	0.0004663	0.003099	neg	4.1421	4.6581	4.1955	4.1267	4.2934	3.9596	3.3764	3.5047	2.4914	3.4563	3.353	3.1479
neg_11454	metab_23954	Resorcinol	C6H6O2	-	3.42892	109.029	1.10123	0.934913	0.002637	0.009676	neg	4.6982	4.5612	4.3431	4.4164	4.6367	4.4494	4.2073	4.2718	4.2085	4.1708	4.2481	4.2296
neg_11501	metab_24001	(Z)-6-(2-Methoxyvinyl)-7-methyl-2H-1-benzopyran-2-one	C13H12O3	HMDB0032656	3.34933	215.071	1.07828	0.954843	0.003702	0.01233	neg	6.6084	6.3454	6.389	6.284	6.6115	6.2964	6.1714	6.1289	6.0312	6.1081	6.192	6.158
neg_11502	metab_24002	1,2,3,4,5,6-Hexahydro-5-(1-hydroxyethylidene)-7H-cyclopenta[b]pyridin-7-one	C10H13NO2	HMDB0039655	3.34933	214.064	1.09922	0.939318	0.001358	0.006054	neg	4.933	4.7677	4.6867	4.6829	4.9354	4.67	4.5067	4.5159	4.3836	4.518	4.5048	4.5032
neg_11503	metab_24003	(R)-Shinanolone	C11H12O3	HMDB0030580	3.34933	173.06	1.13153	0.933658	0.002781	0.01004	neg	4.9082	4.6449	4.6856	4.59	4.9044	4.5722	4.4546	4.3952	4.3051	4.4001	4.452	4.4213
neg_11507	metab_24007	5-Chloro-6-methoxy-2(3H)-benzoxazolone	C8H6ClNO3	HMDB0032846	3.34143	443.009	1.42546	0.908042	0.000814	0.004324	neg	5.3944	5.1616	5.1328	5.026	5.4724	5.0027	4.7618	4.6563	4.5504	4.7345	4.8387	4.7798
neg_11529	metab_24029	O-Demethylfonsecin	C14H12O6	HMDB0033649	3.32568	321.063	1.5594	0.827503	0.0168	0.03697	neg	4.3201	5.1505	4.4147	4.4673	4.4097	4.5083	4.0896	4.0925	2.6473	3.8169	3.9582	3.9622
neg_11542	metab_24042	Glucose isomerase from streptomyces rubiginosus	C17H17ClN2O3S	HMDB0032295	3.31783	409.061	1.15405	0.927735	0.002296	0.008771	neg	4.8413	5.2101	4.9652	4.9752	4.9102	4.8192	4.7709	4.6531	4.2919	4.5728	4.647	4.639
neg_11623	metab_24123	Dolichin B	C20H20O5	HMDB0029468;LMPK12070015	3.18228	321.11	1.75336	0.819759	0.001034	0.005012	neg	4.345	4.4368	3.9786	4.1275	4.8313	4.2106	3.4247	3.7523	3.1119	3.3433	3.8004	3.8274
neg_11663	metab_24163	Moracin F	C16H14O5	HMDB0033309	3.11018	331.084	1.19317	0.919056	0.000716	0.003998	neg	4.3816	4.4165	4.3386	4.2524	4.3462	4.2072	4.0929	3.9826	3.7035	4.045	4.0415	3.9809
neg_11684	metab_24184	Ethylsuberenol	C17H20O4	HMDB0039044	3.06223	333.135	1.50519	0.770032	0.02315	0.04737	neg	3.5193	3.401	2.863	2.4147	3.717	3.1075	2.1879	2.5313	3.3475	2.1513	2.2148	2.2131
neg_11689	metab_24189	6-(2-Carboxyethyl)-7-hydroxy-2,2-dimethyl-4-chromanone glucoside	C20H26O10	HMDB0034032	3.0463	407.136	1.72898	0.836305	2.912e-05	0.0009708	neg	4.0856	4.193	3.8171	4.0065	4.1849	3.9426	3.376	3.1246	3.2493	3.4252	3.5715	3.5179
neg_11713	metab_24213	N-despropyl ropinirole	C13H18N2O	HMDB0060625	3.0146	255.089	2.17321	0.756941	0.002423	0.00909	neg	5.3297	4.8495	4.5193	4.0707	5.1956	4.1246	3.5268	3.6542	3.2829	3.3784	3.7083	3.7116
neg_11723	metab_24223	Butyl (S)-3-hydroxybutyrate glucoside	C14H26O8	HMDB0031694	2.99878	303.146	1.19052	0.919348	0.002733	0.009908	neg	4.6017	4.8043	4.4029	4.7224	4.8656	4.5772	4.3069	4.4224	4.0406	4.1379	4.4155	4.3912
neg_11734	metab_24234	Taraxinic acid glucosyl ester	C21H28O9	HMDB0035249	2.975	469.173	1.6514	0.857328	0.0005374	0.003364	neg	4.3778	4.6846	4.2695	4.8492	4.9006	4.6731	3.9812	3.9966	3.7941	3.7694	4.1451	4.1095
neg_11750	metab_24250	(R)-Pelletierine	C8H15NO	HMDB0030324	2.935	186.113	1.25178	0.9186	0.002383	0.008993	neg	5.0589	5.1728	4.9163	4.733	5.2429	4.8772	4.5146	4.6651	4.3759	4.5283	4.7426	4.7337
neg_11906	metab_24406	Garcinia lactone dibutyl ester	C14H22O7	HMDB0040462	2.65477	301.13	1.10733	0.926691	0.004688	0.01455	neg	4.3705	4.6053	4.1335	4.5075	4.5329	4.2876	4.168	4.1449	3.962	3.9348	4.1327	4.1564
neg_11914	metab_24414	Trans-3-Hydroxycotinine glucuronide	C16H20N2O8	HMDB0001204	2.6388	349.105	1.49156	0.888105	0.0002289	0.002139	neg	4.6925	4.9914	4.6845	4.7068	5.0649	4.7628	4.313	4.3823	4.0357	4.1056	4.4228	4.4082
neg_11920	metab_24420	DHAP(8:0)	C11H21O7P	HMDB0011685	2.6308	277.087	1.53178	0.862425	0.0009454	0.004744	neg	4.5719	4.5949	4.0922	4.1563	4.5263	4.1842	3.87	3.9985	3.4645	3.5195	3.8787	3.7992
neg_11924	metab_24424	2-O-Benzoyl-D-glucose	C13H16O7	HMDB0034618	2.6228	265.073	1.00551	0.940216	0.002804	0.01009	neg	4.37	4.4603	4.3442	4.3277	4.3326	4.2595	4.1987	4.0439	3.8475	4.1316	4.1521	4.1629
neg_11943	metab_24443	Glutamylphenylalanine	C14H18N2O5	HMDB0029156	2.59092	293.115	1.19382	0.91752	0.01639	0.03625	neg	5.4134	5.5077	5.0281	4.7989	5.5952	5.2987	4.7208	4.8747	4.617	4.7441	5.0335	5.0446
neg_11951	metab_24451	(6E,8R,10Z)-8-hydroxy-3-oxohexadecadienoic acid	C16H26O4	HMDB0062365	2.57495	303.157	1.44445	0.82981	0.0001217	0.001619	neg	2.7845	2.9302	2.6744	2.7767	2.9832	2.5965	2.3212	2.4084	2.2919	2.1237	2.4478	2.3044
neg_12041	metab_24541	Ethyl vanillin	C9H10O3	HMDB0029665	2.41593	211.061	1.27649	0.902535	0.005819	0.01695	neg	4.5854	4.2951	4.1932	4.1507	4.6915	4.1248	3.9985	3.9119	3.7147	3.9392	3.9877	3.9496
neg_12061	metab_24561	Acerosin	C18H16O8	LMPK12111473;HMDB0030812	2.38392	405.084	1.19672	0.917063	0.004376	0.01386	neg	4.619	4.8017	4.6313	4.5548	4.6684	4.5054	4.4147	4.2742	3.845	4.2313	4.3604	4.3532
neg_12233	metab_24733	Cyclocalopin F	C15H18O6	HMDB0039825	2.22635	275.094	1.13841	0.916926	0.0286	0.05601	neg	4.8868	4.3477	4.2672	4.3608	4.8907	4.256	4.1538	4.1406	4.0503	4.1211	4.2235	4.0785
neg_12364	metab_24864	N-Deschlorobenzoyl indomethacin	C12H13NO3	HMDB0013988	2.04032	218.082	1.76266	0.815239	0.0007336	0.004067	neg	3.9962	4.1881	3.8486	4.0224	4.1846	3.858	3.3236	3.4831	3.0027	2.8219	3.5368	3.4731
neg_12402	metab_24902	Hypoglycin B	C12H18N2O5	HMDB0029428	2.00035	269.115	1.07644	0.920439	0.01164	0.02816	neg	4.2044	4.5434	3.934	4.3752	4.4455	4.2157	3.9046	4.1603	3.8159	3.7512	4.0213	4.0191
neg_12428	metab_24928	Serylglutamic acid	C8H14N2O6	HMDB0029038	1.9765	279.086	1.52621	0.856718	0.003431	0.01166	neg	4.4403	4.6205	4.0671	4.0615	4.8374	4.2278	3.7073	3.9584	3.3774	3.5725	3.953	3.9242
neg_12708	metab_25208	3,3'-Dithiobis[4,5-dihydro-2-methylfuran]	C10H14O2S2	HMDB0039670	1.61888	505.081	1.83645	0.736052	0.02621	0.05224	neg	4.8194	4.5374	3.4915	2.7724	5.0806	4.4632	3.2892	3.359	2.6271	2.8783	3.2292	3.1409
neg_12713	metab_25213	5-ethyl-5-methyl-2,4-oxazolidinedione	C6H9NO3	HMDB0061082	1.61888	188.056	2.05593	0.708397	0.005518	0.01631	neg	4.3355	4.2929	3.2511	3.5076	4.6026	3.4452	2.2476	3.3191	2.5669	2.0535	3.2535	3.1607
neg_12784	metab_25284	L-Agaritine	C12H17N3O4	HMDB0033758	1.5003	302.089	1.79201	0.770902	0.002124	0.008299	neg	3.6169	3.609	3.9828	3.2826	3.8715	3.4519	3.0509	2.8194	2.2903	2.3495	3.1666	3.1427
neg_12786	metab_25286	(3R)-3,4-Dihydroxy-3-(hydroxymethyl)butanenitrile 4-glucoside	C11H19NO8	HMDB0034085	1.5003	274.094	1.27666	0.911765	0.0154	0.03457	neg	5.7973	5.7566	5.2582	5.1995	6.0906	5.5592	4.9305	5.3705	4.89	4.9871	5.2534	5.2594
neg_12885	metab_25385	20-Hydroxy-leukotriene E4	C23H37NO6S	LMFA03020025;LMFA03020062;HMDB0012639	1.27202	492.185	2.67009	0.67452	0.0003497	0.002651	neg	5.1622	5.1375	4.927	5.0911	5.166	4.8233	4.0297	3.6257	2.688	2.8693	3.5591	3.6726
neg_12915	metab_25415	Raffinose	C18H32O16	HMDB0003213	1.20918	525.148	1.86924	0.759047	0.03487	0.06511	neg	5.3001	4.8612	3.4192	3.438	5.5069	4.1673	3.3889	3.4011	3.2926	3.352	3.4159	3.4143
neg_12938	metab_25438	2-O-alpha-D-Galactopyranosyl-1-deoxynojirimycin	C12H23NO9	HMDB0041337	1.17003	306.12	2.04869	0.705969	0.001479	0.006431	neg	3.784	3.7285	2.9093	2.9553	3.7416	3.2874	2.3781	2.3903	2.2822	2.5484	2.405	2.4034
neg_12961	metab_25461	Phenylglucuronide	C12H14O7	HMDB0059806	1.13077	539.143	1.64703	0.843855	0.0077	0.02087	neg	5.4117	5.2997	4.6118	4.4429	5.5645	4.9871	4.1733	4.5895	3.7629	3.9598	4.5751	4.5222
neg_13038	metab_25538	Histidinyl-Gamma-glutamate	C11H17N5O4	HMDB0028899	1.06123	304.104	1.37969	0.843512	0.03086	0.05938	neg	4.0678	4.2702	4.2256	3.9967	4.0393	3.8622	3.9337	3.9088	2.5449	3.2335	3.7168	3.2977
neg_13459	metab_25959	3-Pyridylacetic acid	C7H7NO2	HMDB0001538	0.788733	136.039	1.04551	0.933403	0.008848	0.02299	neg	4.6018	4.9608	4.537	4.789	5.0282	4.7358	4.4654	4.5958	4.235	4.3866	4.5288	4.5293
neg_13904	metab_26404	Ribose 1-phosphate	C5H11O8P	HMDB0001489	0.63565	229.012	1.34407	1.09327	0.03319	0.06275	neg	5.8467	5.4872	6.2713	5.9497	4.9751	5.9519	6.2297	6.4819	6.1921	6.357	6.2114	6.2265
neg_14537	metab_27037	(gamma-Glutamyl)-lysine	C11H21N3O5	-	0.498067	274.142	1.03618	1.07063	0.02808	0.05518	neg	3.8409	4.373	4.5119	4.3532	4.317	4.5108	4.6519	4.6963	4.4809	4.6735	4.6241	4.6133

## Sheet: C50vsC80
ID	Metab ID	Metabolite	Formula	Library ID	Retention time	M/Z	VIP_pred_OPLS-DA	FC(C80/C50)	P_value	FDR	mode	C50-1	C50-2	C50-3	C50-4	C50-5	C50-6	C80-1	C80-2	C80-3	C80-4	C80-5	C80-6
pos_65	metab_64	D-Pipecolic acid	C6H11NO2	HMDB0005960	0.7055	130.086	1.53137	1.03404	0.008071	0.1074	pos	7.4479	7.5444	7.4235	7.0983	7.3605	7.3674	7.5346	7.6677	7.6313	7.6506	7.6309	7.6333
pos_132	metab_131	Aflatoxin B1 dialcohol	C18H18O6	HMDB0011672	4.65353	353.1	1.10559	0.982387	0.003904	0.08139	pos	6.6479	6.6287	6.5499	6.5326	6.6402	6.5159	6.4584	6.4419	6.4421	6.5595	6.4588	6.4607
pos_278	metab_277	Marmesin rhamnoside	C20H24O8	HMDB0039564	4.15997	375.145	1.1081	1.04002	0.03456	0.2044	pos	4.4061	4.5806	4.319	4.2511	4.4833	4.3455	4.5786	4.4195	4.7859	4.6528	4.5112	4.4972
pos_314	metab_313	4-Hydroxy-3-methoxycinnamaldehyde	C10H10O3	-	5.91988	357.134	1.29092	0.973244	0.003778	0.08027	pos	6.2939	6.4275	6.321	6.2157	6.1891	6.228	6.0379	6.1423	6.0457	6.1858	6.1214	6.1301
pos_375	metab_374	PE(14:1(9Z)/P-18:0)	C37H72NO7P	HMDB0008884	7.70228	696.495	2.79325	0.867489	0.005746	0.09414	pos	6.5363	6.6812	7.0659	7.4957	6.0211	7.0433	5.4144	5.8456	5.9288	6.3807	5.9834	5.8799
pos_410	metab_409	PE(P-18:1(9Z)/14:1(9Z))	C37H70NO7P	HMDB0011435	7.40042	694.479	2.18366	0.916541	0.01897	0.1549	pos	7.2834	7.0376	7.5528	7.8144	6.5497	7.4724	6.3806	6.6459	6.5625	7.0498	6.7623	6.6612
pos_935	metab_934	3R-aminononanoic acid	C9H19NO2	LMFA01100019	2.65393	174.149	1.11374	1.03157	0.04198	0.2239	pos	5.9666	6.0455	5.7226	5.8723	6.1307	5.8079	6.1654	6.0623	6.3343	6.038	6.0252	6.0391
pos_965	metab_964	Pterosin E	C14H16O3	HMDB0036605	2.88602	250.144	1.68226	0.949627	0.001297	0.05684	pos	5.2714	5.2755	5.1254	5.1774	5.3285	5.1475	4.9243	4.8649	4.9664	5.1773	4.9416	4.8752
pos_982	metab_981	5-Hydroxyindoleacetic acid	C10H9NO3	HMDB0000763	2.97855	192.066	1.26048	1.05508	0.0499	0.2432	pos	4.7514	4.6972	4.3516	4.585	4.9542	4.5478	5.1973	4.6912	5.0754	4.7905	4.8757	4.7933
pos_986	metab_985	Cis-2-Carboxycyclohexyl-acetic acid	C9H14O4	-	3.0091	169.086	1.3094	1.04131	0.003074	0.07519	pos	4.4167	4.554	4.3594	4.4238	4.5828	4.3856	4.6455	4.6356	4.7385	4.6716	4.5649	4.5731
pos_990	metab_989	8-Hydroxy-5,6-octadienoic acid	C8H12O3	LMFA01031076;HMDB0031101	3.02548	313.163	1.24694	1.03936	0.006991	0.1015	pos	4.7886	4.7483	4.5707	4.7473	4.8578	4.6428	4.9569	4.8008	5.0407	4.9358	4.8544	4.8824
pos_994	metab_993	Santene hydrate	C9H16O	HMDB0037001	3.05597	344.259	2.09653	1.11895	0.0115	0.1229	pos	3.8762	3.9659	3.8487	3.927	4.0095	3.9267	4.3119	3.9188	4.6288	4.2114	4.6246	4.6633
pos_1012	metab_1011	Tenuazonic acid	C10H15NO3	HMDB0036074	3.20917	180.102	1.19001	1.0391	0.04027	0.2193	pos	5.326	5.5459	5.1418	5.3349	5.3342	5.2341	5.5443	5.2714	5.4356	5.7793	5.5639	5.5737
pos_1175	metab_1174	N-[(5-Hydroxy-2-pyridinyl)methyl]adenosine	C16H18N6O5	HMDB0040912	4.80508	375.144	1.3251	0.966919	0.005497	0.09305	pos	5.4299	5.5725	5.4657	5.3551	5.2892	5.3529	5.1668	5.2211	5.1733	5.3016	5.2673	5.2641
pos_1197	metab_1196	(2Z)-2-hydroxy-3-(4-methoxyphenyl)prop-2-enal	C10H10O3	HMDB0135647	5.02358	161.06	1.36912	0.966505	0.0004161	0.03956	pos	5.2074	5.2377	5.2033	5.154	5.0876	5.1002	4.9244	5.0281	4.9546	5.0611	4.961	5.0236
pos_1223	metab_1222	2,4,6-undecatrienal	C11H16O	LMFA06000069	5.283	147.117	1.57066	1.05526	0.004762	0.08849	pos	4.8841	5.0323	4.7512	4.8166	4.9914	4.8387	5.0727	5.0367	5.4074	5.2487	5.0884	5.0813
pos_1340	metab_1339	6-Keto-prostaglandin F1a	C20H34O6	HMDB0002886	6.12987	353.23	1.16738	1.0263	0.02094	0.1629	pos	6.8228	6.9129	6.6492	6.6945	6.9904	6.7589	7.0308	6.8905	7.1193	7.0144	6.9169	6.9343
pos_1419	metab_1418	Oleoyl Ethanolamide	C20H39NO2	-	6.57813	326.306	2.24072	1.10147	0.0233	0.1717	pos	5.0778	4.7927	5.4921	5.8891	4.9676	5.5355	6.0089	5.7456	5.7696	5.706	5.9143	5.8324
pos_1525	metab_1524	PS(14:0/18:4(6Z,9Z,12Z,15Z))	C38H66NO10P	HMDB0112293;LMGP03010925	8.02685	728.448	2.16498	0.896175	0.02841	0.1881	pos	6.0704	5.5035	6.3815	6.698	5.3917	6.1911	5.1115	5.3903	5.3081	5.8633	5.4144	5.3835
pos_1889	metab_1888	LysoPC(18:3(9Z,12Z,15Z))	C26H48NO7P	HMDB0010388	6.28672	518.324	4.45351	0.518964	0.0289	0.1896	pos	4.815	3.938	6.3731	5.0395	4.0902	5.6395	5.3107	0.8989	4.2838	0.9325	3.1486	0.942
pos_1899	metab_1898	Acylated phloroglucinol	C24H38O5	-	6.27195	407.277	1.73108	0.952357	0.0007574	0.04694	pos	6.0998	5.804	6.0854	5.9988	6.0523	5.9804	5.79	5.8313	5.7862	5.5834	5.6477	5.6647
pos_2098	metab_2097	11-Dodecenoic acid	C12H22O2	LMFA01030043;HMDB0032248	5.96502	240.196	1.02351	1.02496	0.0156	0.1409	pos	4.6051	4.6276	4.59	4.5506	4.6383	4.6325	4.731	4.867	4.7434	4.6751	4.6462	4.6688
pos_2203	metab_2202	3-Formyl-4,6-dihydroxy-2-methoxy-5-methylchalcone	C18H16O5	LMPK12120427	3.5136	313.107	1.48873	0.95902	0.008236	0.1083	pos	5.3718	5.1666	5.2395	5.2231	5.2801	5.0501	5.1571	4.8826	4.8701	5.0742	5.0857	4.9773
pos_2300	metab_2299	Genipic acid	C9H12O4	HMDB0036072	0.7425	202.108	1.13134	1.0377	0.04478	0.2304	pos	4.6379	5.0335	4.8394	4.796	4.9111	4.7523	4.9505	4.8555	5.0599	5.2589	4.9463	4.9897
pos_2317	metab_2316	Valinopine	C10H17NO6	-	0.7575	280.139	1.06849	1.02323	0.01345	0.131	pos	5.8646	5.9021	5.8092	5.9232	6.0232	5.8602	6.0155	5.9441	6.1933	6.0004	6.0114	6.0397
pos_2516	metab_2515	L-Histidine	C6H9N3O2	HMDB0000177	0.512683	156.077	1.33859	0.956589	0.03651	0.2089	pos	5.0195	5.232	5.3345	5.0437	5.1132	5.08	4.9014	4.7154	4.7351	5.2122	5.0124	4.908
pos_2640	metab_2639	2-Pyrrolidinone	C4H7NO	HMDB0002039	0.617	86.0606	1.27651	1.03467	0.007396	0.1039	pos	4.6966	4.7046	4.6711	4.6914	4.6956	4.7499	4.8677	4.8037	5.0378	4.8903	4.7722	4.8156
pos_2715	metab_2714	L-3-Cyanoalanine	C4H6N2O2	HMDB0060245	0.683517	97.0402	1.21328	0.962371	0.04772	0.2379	pos	4.59	4.749	4.5641	4.4252	4.6647	4.4313	4.5418	4.1617	4.3426	4.5034	4.408	4.436
pos_2738	metab_2737	(+)-2,3-Dihydro-3-methyl-1H-pyrrole	C5H9N	HMDB0033529	0.7055	84.0813	1.27862	1.02685	0.01235	0.1269	pos	6.8727	6.9278	6.8209	6.5905	6.8858	6.796	6.9495	7.0332	6.9987	7.005	7.0005	7.0075
pos_2874	metab_2873	Syringic acid	C9H10O5	HMDB0002085	0.8168	199.06	2.7288	0.837468	0.003906	0.08139	pos	5.0333	4.8728	4.6212	4.4696	4.5593	4.5017	3.2004	4.0826	3.6873	4.1536	4.1045	4.2703
pos_3225	metab_3224	N-Tigloylglycine	C7H11NO3	-	1.67205	190.107	1.1646	1.03317	0.01137	0.1227	pos	4.5068	4.7392	4.5891	4.6456	4.4665	4.5493	4.7314	4.6716	4.7929	4.8109	4.7037	4.6986
pos_3419	metab_3418	N6-Acetyl-5S-hydroxy-L-lysine	C8H16N2O4	HMDB0033891	2.0095	169.097	1.86824	1.07655	0.04855	0.24	pos	5.0152	5.1797	5.9065	5.5792	5.5049	5.8161	5.8265	5.8987	5.9707	5.4389	6.0525	6.3366
pos_3433	metab_3432	7,8-Dihydrobiopterin	C9H13N5O3	-	2.03352	272.136	2.13515	1.09287	0.002739	0.07249	pos	4.6542	4.9912	4.6614	4.3905	4.8309	4.899	5.1959	5.2394	5.0678	5.306	5.0885	5.1703
pos_3519	metab_3518	Vanilpyruvic acid	C10H10O5	HMDB0011714	2.18842	211.06	1.18289	1.03224	0.003118	0.07559	pos	4.8231	4.7924	4.6668	4.8207	4.6943	4.6711	4.9101	4.8582	5.0118	4.8833	4.8674	4.8582
pos_3658	metab_3657	11-nor-9-carboxy-Delta(9)-tetrahydrocannabinol	C21H28O4	HMDB0062770	2.42367	386.229	1.97428	1.10228	0.01158	0.1232	pos	4.7549	5.0065	4.5625	4.0987	4.7599	4.5104	5.0312	4.8585	5.389	5.0881	5.0697	5.0852
pos_3731	metab_3730	O-Hydroxyhippuric acid	C9H9NO4	-	2.56137	178.05	2.18442	1.1188	9.304e-05	0.02564	pos	3.6255	3.8792	3.5878	3.5444	3.532	3.5979	3.9869	4.0415	4.2013	3.9082	4.1268	4.091
pos_3805	metab_3804	2-Formaminobenzoylacetate	C10H9NO4	-	2.71602	208.061	1.41196	1.05189	0.02669	0.1831	pos	5.0733	5.4656	4.8865	5.2257	5.2657	5.0738	5.5416	5.1497	5.5803	5.4424	5.436	5.45
pos_3904	metab_3903	ORSELLINIC ACID, ETHYL ESTER	C10H12O4	-	2.91647	197.081	1.20003	0.970566	0.009821	0.1159	pos	5.415	5.4347	5.4782	5.3097	5.2483	5.3197	5.1334	5.1635	5.1339	5.3431	5.2614	5.2264
pos_3978	metab_3977	3-Indoleacetic Acid	C10H9NO2	-	3.05597	176.071	1.3629	1.04817	0.01005	0.1168	pos	4.8678	4.6774	4.6298	4.6565	4.7887	4.6488	5.0853	4.8423	5.1331	4.7673	4.901	4.9069
pos_4023	metab_4022	Oxandrolone	C19H30O3	HMDB0014759	3.15467	370.234	2.48379	1.17645	0.0009855	0.05167	pos	3.4548	3.819	3.7768	3.1693	3.417	3.3074	3.8906	3.961	4.3807	4.136	4.1911	4.0805
pos_4146	metab_4145	3-O-Feruloylquinic acid	C17H20O9	HMDB0030669	3.41458	333.098	1.47584	0.939521	0.04573	0.2326	pos	4.5952	4.3961	4.943	4.2364	4.5173	4.3975	4.2836	4.3862	4.3532	4.1563	4.2842	3.9815
pos_4218	metab_4217	Isobutyryl carnitine	C11H21NO4	-	3.6277	232.155	1.51648	1.06138	0.007479	0.1042	pos	4.1465	4.2029	4.0775	4.0232	4.2016	4.0797	4.333	4.2741	4.6808	4.3389	4.3036	4.3185
pos_4291	metab_4290	()-Equol	C15H14O3	-	3.81762	243.102	1.59748	0.949691	0.001533	0.05987	pos	4.7963	4.6488	4.614	4.7373	4.7512	4.6011	4.6214	4.5131	4.356	4.3492	4.4739	4.4164
pos_4331	metab_4330	2'-Hydroxyfurano[2'',3'':4',3']chalcone	C17H12O3	LMPK12120002	3.96973	265.086	1.16761	0.974058	0.001872	0.06398	pos	4.8442	4.9228	4.833	4.8327	4.9233	4.7838	4.7659	4.6885	4.7021	4.8113	4.7111	4.7049
pos_4523	metab_4522	QYNAD	C25H35N7O11	HMDB0006730	4.44882	651.268	2.21752	1.13897	0.03508	0.2063	pos	4.6472	4.9211	4.2212	4.1747	5.5429	4.9035	5.7624	5.5314	5.6393	4.5951	5.3745	5.4543
pos_4530	metab_4529	Diosmin	C28H32O15	HMDB0029548	4.46402	609.182	5.16428	1.93048	0.0001786	0.03163	pos	1.9318	3.1409	1.8792	1.8999	3.6745	3.0103	5.5346	4.1536	5.2733	5.1258	4.9606	4.9427
pos_4605	metab_4604	3,4-dihydroxy-1-methyl-4,5-diphenylpiperidine-2,6-dione	C18H17NO4	HMDB0134801	4.68373	294.113	1.17681	0.972452	0.01888	0.1544	pos	5.5143	5.5285	5.3882	5.3309	5.5485	5.3584	5.267	5.2177	5.233	5.4669	5.2936	5.2888
pos_4614	metab_4613	5'-Deoxy-5-fluorocytidine	C9H12FN3O4	HMDB0060405	4.69882	210.068	1.1672	0.967394	0.01908	0.1555	pos	4.6364	4.5588	4.4933	4.4386	4.6466	4.4616	4.4284	4.4044	4.3072	4.5524	4.2938	4.358
pos_4657	metab_4656	1-Methoxypyrene-6,7-oxide	C17H12O2	-	4.82783	249.091	1.2896	0.972614	0.01874	0.1537	pos	6.2616	6.3717	6.1793	6.1016	6.4069	6.1417	6.1712	6.0372	6.0839	6.0727	6.0311	6.0435
pos_4673	metab_4672	3,4',5-Biphenyltriol	C12H10O3	HMDB0032713	4.8657	203.07	1.62312	0.936616	0.00495	0.09012	pos	4.3497	4.3888	4.2878	4.3169	4.0206	4.1005	3.8653	4.0897	3.9531	4.0816	3.9199	3.9393
pos_4843	metab_4842	Alpha-Santonin	C15H18O3	LMPR0103190001	5.29058	247.133	1.71097	1.10539	0.03815	0.2144	pos	3.9611	4.0628	4.4894	3.868	4.1397	3.9606	5.0164	3.9627	4.2349	4.5884	4.621	4.6358
pos_4855	metab_4854	1-(beta-D-Glucopyranosyloxy)-3-octanone	C14H26O7	HMDB0031315	5.3361	651.302	2.58125	1.2165	0.04219	0.2244	pos	4.141	5.2283	3.9103	3.4632	2.9264	4.3291	5.2897	4.4242	4.8937	4.9069	4.8425	4.8414
pos_4870	metab_4869	4,4alpha,5,6-Tetrahydro-7-methyl-2(3H)-naphthalenone	C11H14O	HMDB0039803	5.39688	163.112	1.18411	1.04076	0.01848	0.1526	pos	4.5087	4.6727	4.3908	4.4522	4.6182	4.4412	4.7035	4.5481	4.8568	4.8126	4.6313	4.6386
pos_4917	metab_4916	3-O-Methylniveusin A	C21H28O8	HMDB0039084	5.54878	426.213	2.65788	0.789299	0.02659	0.1828	pos	5.0286	3.5295	3.8482	3.1482	3.8475	4.0313	3.4052	2.6758	3.6219	2.5527	3.0801	3.1607
pos_4996	metab_4995	Corchorifatty acid F	C18H32O5	HMDB0035919	5.77648	346.259	1.28962	1.0535	0.03562	0.2075	pos	4.4684	4.7301	4.3493	4.441	4.6407	4.4006	4.7799	4.4426	4.8146	5.0256	4.6723	4.7433
pos_5007	metab_5006	16-Ketoestradiol	C18H22O3	HMDB0000406;LMST02010047	5.79918	319.192	1.34704	1.04661	0.001905	0.06408	pos	3.969	4.0495	3.863	3.9098	4.0901	3.934	4.1448	4.1426	4.2236	4.1892	4.0833	4.1379
pos_5016	metab_5015	2-Indanone	C9H8O	-	5.82195	133.065	1.28237	0.972814	0.003811	0.08037	pos	5.547	5.5173	5.4437	5.3551	5.4336	5.3684	5.323	5.2433	5.2918	5.3361	5.2933	5.2911
pos_5083	metab_5082	Erbstatin Analog	C10H10O4	-	5.92742	195.065	1.23999	0.97	0.006233	0.0971	pos	5.4018	5.5619	5.4329	5.3029	5.3434	5.3581	5.1575	5.2656	5.1633	5.3266	5.2489	5.2644
pos_5087	metab_5086	5,7,2',5'-Tetramethoxyflavanone	C19H20O6	LMPK12140131	5.92742	345.134	1.3061	0.969123	0.004245	0.08445	pos	5.7168	5.8381	5.7662	5.6509	5.5743	5.6562	5.4477	5.5733	5.4452	5.5956	5.5364	5.5445
pos_5355	metab_5354	(6b,7b,13R)-6,7-Diacetoxy-8,14-labdadiene-13-ol	C24H38O5	HMDB0035288	6.2122	448.303	1.52645	0.959254	0.01296	0.1296	pos	5.9032	5.8821	5.8177	5.613	5.892	5.6459	5.8224	5.5016	5.5923	5.4278	5.5044	5.4876
pos_5389	metab_5388	Octadecanedioic acid	C18H34O4	HMDB0000782;LMFA01170029	6.23467	359.218	1.61833	1.05335	0.002994	0.07451	pos	5.6688	5.4299	5.407	5.4471	5.737	5.4923	6.0239	5.6832	5.9157	5.783	5.7843	5.7619
pos_5506	metab_5505	3-hydroxyoctanoyl carnitine	C15H29NO5	HMDB0061634	6.4283	345.238	1.27036	1.03544	0.02278	0.1697	pos	6.1533	5.8055	6.0084	5.8953	6.1973	5.9984	6.3469	6.2536	6.184	5.9954	6.2793	6.2789
pos_5523	metab_5522	Cassine	C18H35NO2	-	6.45075	298.274	2.03412	1.10451	0.03584	0.2078	pos	4.3021	4.2482	4.4106	5.2789	4.1781	4.563	4.9907	4.885	4.9015	4.9163	5.0999	5.0069
pos_5539	metab_5538	D-erythro-Sphingosine C-17	C17H35NO2	-	6.47317	286.274	2.63815	1.13056	0.002954	0.07407	pos	4.9413	4.9583	4.9897	5.7595	4.8608	5.232	6.0234	5.5875	5.655	5.9124	5.8061	5.7736
pos_5636	metab_5635	2-Aminoheptanoate	C7H15NO2	HMDB0094649	6.66898	128.107	1.11781	1.03028	0.02312	0.1709	pos	5.03	5.0023	4.9542	4.9716	4.9586	5.0083	5.2876	5.0185	5.253	5.0081	5.1186	5.1443
pos_5669	metab_5668	Stearoylethanolamide	C20H41NO2	HMDB0013078	6.73673	328.321	1.80086	1.0779	0.03928	0.2168	pos	4.4586	4.1678	4.8396	4.9885	4.4527	4.8948	4.9995	5.0285	5.1372	4.8105	5.0305	4.9666
pos_5887	metab_5886	PS(18:3(6Z,9Z,12Z)/18:4(6Z,9Z,12Z,15Z))	C42H68NO10P	LMGP03010382;HMDB0112453	7.2419	800.444	2.11896	0.887926	0.03502	0.2061	pos	5.6889	5.0462	6.0844	6.2027	5.039	5.8836	4.7431	4.8651	4.6022	5.6306	5.1887	5.111
pos_5976	metab_5975	DG(15:0/18:0/0:0)	C36H70O5	HMDB0007071	7.61923	627.495	2.17946	1.1044	0.03817	0.2144	pos	4.7871	4.6681	5.6796	5.6419	4.8038	5.5112	5.8513	5.7315	5.8076	5.3427	5.8608	5.7457
pos_6624	metab_6623	PS(18:4(6Z,9Z,12Z,15Z)/16:1(9Z))	C40H68NO10P	LMGP03010432;HMDB0112489	8.0873	798.428	2.46708	0.879528	0.01237	0.127	pos	6.2229	5.3937	6.1698	6.4203	5.3018	6.1033	5.1901	5.0205	4.8633	5.726	5.2367	5.2846
pos_6696	metab_6695	Pyroglutamic acid	C5H7NO3	HMDB0000267	7.75498	162.076	2.11333	0.8709	0.01502	0.138	pos	4.2378	3.9935	4.4838	4.7858	3.7016	4.4063	3.4551	3.5621	3.6677	3.9948	3.8432	3.7779
pos_6716	metab_6715	PS(15:0/18:1(11Z))	C39H74NO10P	HMDB0112283	7.70228	786.465	3.3549	0.775087	0.002556	0.07064	pos	5.2291	5.3834	5.751	6.1177	4.4823	5.745	3.7884	3.7238	4.4141	5.0222	4.0176	4.3811
pos_6833	metab_6832	Momordin Ia	C42H66O13	HMDB0041017	7.40042	801.439	2.4112	0.874537	0.01009	0.1169	pos	5.7917	5.54	5.878	6.0139	4.9359	5.8875	4.402	4.9184	4.7613	5.5547	5.1311	5.0098
pos_6837	metab_6836	Sphingosine 1-phosphate	C18H38NO5P	HMDB0000277	7.40042	362.246	2.41476	0.850245	0.01792	0.1512	pos	5.0926	4.8052	5.4254	5.724	4.2071	5.3134	3.7562	4.3965	4.2416	4.8648	4.4191	4.3153
pos_7405	metab_7404	Palmitoyl Ethanolamide	C18H37NO2	LMFA08040057;LMFA08040013	6.57062	300.29	2.58898	1.11314	0.0009578	0.05088	pos	5.237	5.1923	5.4031	5.8629	5.2543	5.5556	6.2908	5.9169	5.9616	5.9164	6.0836	6.0178
pos_7414	metab_7413	Kentsin	C21H40N8O6	HMDB0005776	6.5631	539.267	1.32256	0.963743	0.02891	0.1896	pos	5.5309	5.4766	5.7299	5.4052	5.2546	5.3694	5.3414	5.1851	5.3097	5.2066	5.2511	5.2817
pos_7522	metab_7521	Linoleoyl Ethanolamide	C20H37NO2	HMDB0012252	6.47317	324.29	2.7732	1.14197	0.005229	0.09143	pos	4.8655	4.7548	5.2625	5.7845	4.8302	5.3135	6.0495	5.7079	5.8413	5.8344	5.9106	5.8405
pos_7584	metab_7583	Gingerglycolipid A	C33H56O14	HMDB0041093	6.4283	677.373	1.5327	1.04806	0.03675	0.2095	pos	5.6578	5.9081	5.8974	6.0468	5.5203	6.0487	6.2242	6.1627	6.1793	6.3897	5.904	5.9101
pos_7642	metab_7641	Physagulin C	C30H38O9	HMDB0038535	6.39063	565.246	1.99438	0.937257	0.002078	0.06561	pos	6.3166	6.7155	6.5834	6.3962	6.1856	6.4348	6.1059	6.168	5.7763	6.0466	6.0465	6.0657
pos_7649	metab_7648	3beta-Hydroxy-19-oxochol-5-en-24-oic Acid	C24H36O4	LMST04010335	6.39063	389.266	1.22644	0.964892	0.04564	0.2325	pos	5.8723	6.2206	6.245	6.2271	6.0767	6.1044	5.7617	5.7192	5.8492	6.2233	5.9386	5.9592
pos_7683	metab_7682	PA(18:4(6Z,9Z,12Z,15Z)/0:0)	C21H35O7P	LMGP10050024	6.3682	431.217	2.37279	0.887775	0.0101	0.1169	pos	6.026	5.4078	5.5654	5.8051	5.0538	5.6657	5.1094	4.5794	4.6589	5.5559	4.9247	4.9323
pos_7890	metab_7889	PS(18:3(6Z,9Z,12Z)/24:1(15Z))	C48H86NO10P	HMDB0112467	6.24213	868.603	1.00699	1.01888	0.02898	0.1896	pos	5.9944	5.9821	6.0377	6.0735	6.063	6.0815	6.1569	6.2843	6.0151	6.0971	6.149	6.218
pos_7946	metab_7945	(2S)-2-Butanol O-[b-D-Apiofuranosyl-(1->6)-b-D-glucopyranoside]	C15H28O10	HMDB0041255	6.2197	410.199	1.22989	1.04075	0.0317	0.1979	pos	5.6095	5.4056	5.3587	5.3557	5.69	5.4194	5.9249	5.5002	5.8761	5.6158	5.6295	5.6318
pos_8275	metab_8274	2,4-Undecadiene-8,10-diynoic acid 2,3-dehydropiperidide	C16H17NO	HMDB0033525	6.07003	240.138	1.38351	1.05797	0.01258	0.1279	pos	4.1804	4.1101	3.9513	4.1762	4.2417	4.0769	4.5755	4.1085	4.4555	4.3162	4.3823	4.3335
pos_8378	metab_8377	Demethoxyegonol	C18H16O4	HMDB0030772	6.01758	297.112	1.22306	0.971434	0.004847	0.08947	pos	5.2354	5.0777	5.1702	5.0693	5.0754	5.0393	4.9382	4.9151	4.9636	5.0906	4.9589	4.9209
pos_8397	metab_8396	1-O-2'-Hydroxy-4'-methoxycinnamoyl-b-D-glucose	C16H20O9	HMDB0040866	6.0101	321.1	1.15718	1.03151	0.009285	0.1136	pos	5.1095	5.1406	5.2031	5.1974	5.0053	5.0029	5.3999	5.2877	5.3184	5.2367	5.1508	5.2346
pos_8476	metab_8475	Celastrol	C29H38O4	HMDB0002385	5.95748	451.281	1.25877	0.965901	0.03913	0.2166	pos	5.5338	5.9839	5.7195	5.564	5.6028	5.5569	5.4267	5.4088	5.5138	5.3992	5.5289	5.522
pos_8546	metab_8545	CITROPTEN	C11H10O4	HMDB0032952	5.91988	207.065	1.22829	0.975034	0.009561	0.1149	pos	6.5784	6.734	6.6287	6.4902	6.4525	6.5272	6.3299	6.4236	6.3321	6.4824	6.4221	6.438
pos_8548	metab_8547	HYMECROMONE METHYL ETHER	C11H10O3	-	5.91988	191.07	1.26887	0.969561	0.004898	0.08984	pos	5.3734	5.5021	5.4026	5.2796	5.2633	5.3081	5.1293	5.2102	5.136	5.2632	5.2023	5.209
pos_8802	metab_8801	2,6-Dihydroxynaphthalene	C10H8O2	-	5.564	161.06	1.30962	0.969748	0.002071	0.06561	pos	5.348	5.4493	5.323	5.2467	5.3152	5.2468	5.1464	5.1379	5.1174	5.2646	5.152	5.1496
pos_8872	metab_8871	Dihydroactinidiolide	C11H16O2	HMDB0035240	5.39688	181.122	1.45171	1.05577	0.006955	0.1012	pos	4.4728	4.6332	4.3295	4.3803	4.5817	4.3942	4.7121	4.542	4.8716	4.8697	4.64	4.6477
pos_8875	metab_8874	DDA	C10H16O	-	5.3893	153.128	1.47373	1.06533	0.007499	0.1042	pos	3.9455	4.1105	3.7972	3.8349	4.0383	3.8789	4.2024	4.003	4.3487	4.3631	4.1305	4.1001
pos_8883	metab_8882	Edulisin VI	C20H22O9	HMDB0041265	5.35892	371.113	1.35286	0.963519	0.0163	0.1445	pos	5.2105	5.2938	5.0751	4.9386	5.2033	5.0325	4.9926	4.9426	4.8431	5.0121	4.9477	4.8939
pos_8920	metab_8919	Simmondsin 2'-ferulate	C26H33NO12	HMDB0035475	5.26782	574.185	1.48402	0.959676	0.01368	0.1321	pos	6.4898	6.521	6.556	6.517	6.0992	6.3527	6.0244	6.3322	6.0902	6.2065	6.1609	6.1709
pos_9033	metab_9032	Cinncassiol C3	C20H30O7	HMDB0036859	5.05345	383.204	1.11087	1.02881	0.02084	0.1626	pos	5.4708	5.6165	5.3201	5.5096	5.5545	5.4411	5.6382	5.5563	5.8236	5.6635	5.5713	5.6054
pos_9103	metab_9102	1,5-bis(4-hydroxy-3-methoxyphenyl)-1,4-pentadien-3-one	C19H18O5	HMDB0040930	4.9485	327.123	1.47747	0.957686	0.002701	0.07188	pos	4.9554	5.0151	4.9813	4.7894	4.787	4.8258	4.6589	4.7184	4.5917	4.7538	4.6957	4.6888
pos_9152	metab_9151	5,6,7-trimethoxy-2-phenyl-4H-chromen-4-one	C18H16O5	HMDB0128592	4.9034	277.086	1.24124	0.965637	0.01311	0.1301	pos	4.8723	4.9652	4.7927	5.0427	4.9051	4.7549	4.719	4.6487	4.7328	4.874	4.6556	4.6944
pos_9199	metab_9198	7C-aglycone	C18H18O4	HMDB0004808	4.80508	299.128	1.21347	0.971262	0.01299	0.1297	pos	5.4995	5.6285	5.4816	5.4475	5.5037	5.4252	5.3621	5.3138	5.2081	5.5211	5.3159	5.3215
pos_9215	metab_9214	6-Hydroxysandoricin	C31H40O12	HMDB0037556	4.7595	637.288	1.45399	0.95247	0.02453	0.1762	pos	5.6309	5.1713	5.2471	5.4687	5.3944	5.2776	5.1238	5.1567	5.3443	4.8284	5.1211	5.0862
pos_9280	metab_9279	Tyramine	C8H11NO	HMDB0000306	4.6611	138.091	1.93672	1.08813	0.003405	0.07761	pos	4.2593	4.3795	4.2498	4.3471	4.3739	4.2621	4.7405	4.4479	4.5631	5.0104	4.7013	4.6868
pos_9283	metab_9282	Pteroic acid	C14H12N6O3	-	4.65353	313.107	1.07343	0.976871	0.03046	0.1941	pos	5.537	5.6036	5.446	5.3832	5.5908	5.3837	5.3814	5.3194	5.3047	5.4919	5.3443	5.3405
pos_9284	metab_9283	Desmethoxymatteucinol	C17H16O4	LMPK12140192	4.65353	285.112	1.0267	0.981913	0.02796	0.1868	pos	6.4375	6.4333	6.2834	6.291	6.4422	6.2593	6.2462	6.1721	6.238	6.354	6.2211	6.2284
pos_9346	metab_9345	N-(1-Deoxy-1-fructosyl)serine	C9H17NO8	HMDB0037842	4.55508	285.127	2.6715	1.14407	0.004718	0.08831	pos	4.3527	5.1255	4.8742	4.7712	4.1893	5.0067	5.2302	5.1906	5.6131	5.3926	5.5389	5.4335
pos_9374	metab_9373	DIHYDRO TANSHINONE	C18H14O3	-	4.4792	279.102	2.86627	0.846885	0.000273	0.03519	pos	4.5662	5.1676	4.6175	4.5677	4.9177	4.5722	4.2678	3.9603	3.8215	4.1849	3.8923	3.9313
pos_9420	metab_9419	3-Methylindole	C9H9N	HMDB0000466	4.40323	132.081	2.35975	0.887985	0.003615	0.07918	pos	5.0445	4.9889	4.468	5.0816	5.1231	4.806	4.7151	3.9387	4.5239	4.3361	4.3501	4.3471
pos_9530	metab_9529	Cis-3,4-Phenanthrenedihydrodiol-4-carboxylate	C15H12O4	-	4.2057	257.081	1.09341	0.971741	0.03082	0.1955	pos	4.9594	4.7934	4.6816	4.8883	4.975	4.7929	4.7138	4.5977	4.7371	4.7531	4.7215	4.7418
pos_9566	metab_9565	Lipoxin B4	C20H32O5	HMDB0005082	4.12955	317.208	3.18257	1.46854	0.02711	0.1844	pos	2.6885	3.0752	2.7724	2.5451	2.7639	2.5615	5.3679	2.6671	3.8913	3.0359	4.5687	4.5576
pos_9588	metab_9587	Echinone	C19H20O6	-	4.0839	345.134	1.54598	0.952223	0.005908	0.0954	pos	4.9032	5.0093	4.8931	4.8108	4.6512	4.742	4.5539	4.5984	4.5857	4.6444	4.6118	4.6314
pos_9702	metab_9701	Americanin D	C18H16O6	HMDB0039601	3.86323	329.103	1.45641	0.962149	0.0007325	0.04682	pos	5.0979	5.2007	5.1022	5.0384	5.1368	5.0179	4.8765	4.8665	4.8385	5.0457	4.9051	4.9012
pos_9703	metab_9702	N2-Galacturonyl-L-lysine	C12H22N2O8	HMDB0033105	3.85563	667.263	2.91276	1.27371	0.01908	0.1555	pos	3.2419	4.1386	3.6076	3.2102	4.6671	3.9113	5.6056	5.1926	4.7972	3.5127	4.9787	4.9225
pos_9944	metab_9943	3-Hydroxydodecanoic acid	C12H24O3	HMDB0000387	3.37652	258.207	1.73413	1.08922	0.01671	0.1458	pos	4.2035	4.5735	4.0608	4.3067	4.4328	4.1831	4.7349	4.2498	4.681	5.0669	4.6545	4.6663
pos_9987	metab_9986	5-Hydroxyflavone	C21H20O8	HMDB0040556	3.30045	445.087	2.08564	1.13718	0.0245	0.1762	pos	3.7828	4.1042	4.2297	3.4787	4.5784	4.2761	4.7893	4.0644	4.3819	4.9226	4.7751	4.8722
pos_10059	metab_10058	Daphnetin	C9H6O4	-	3.19392	220.061	2.56099	1.2342	0.00589	0.09525	pos	2.6391	3.6606	3.2277	3.0762	2.6517	2.8841	3.453	3.2983	3.7406	4.0518	3.9192	3.9251
pos_10064	metab_10063	Wistin	C23H24O10	HMDB0030869	3.17865	524.154	1.77462	1.12766	0.03837	0.2145	pos	4.16	3.8821	3.7598	3.4617	4.1388	3.4407	4.2102	3.7445	4.9349	4.365	4.1911	4.3119
pos_10082	metab_10081	4-nonenoylglycine	C11H19NO3	HMDB0094809	3.14703	255.171	1.34571	0.954271	0.03105	0.1961	pos	4.5319	4.8221	4.5345	4.6064	4.8196	4.5044	4.4954	4.1402	4.5196	4.5277	4.4584	4.4048
pos_10160	metab_10159	1-Phenylethyl formate	C9H10O2	HMDB0037715	3.0091	151.076	1.27176	1.03874	0.003498	0.07826	pos	4.5096	4.6443	4.4723	4.4664	4.6669	4.4985	4.7049	4.6625	4.8304	4.7681	4.6778	4.6719
pos_10165	metab_10164	ETHYL SYRINGATE	C11H14O5	-	3.00147	227.092	1.43313	0.966619	0.0008974	0.04974	pos	5.6488	5.6751	5.674	5.5913	5.4944	5.5268	5.3629	5.3672	5.4158	5.4851	5.4441	5.4121
pos_10166	metab_10165	2,6-Dimethoxyphenol	C8H10O3	HMDB0034158	3.00147	155.07	1.32835	0.963774	0.001421	0.05806	pos	4.628	4.7011	4.6726	4.5993	4.5009	4.5552	4.3816	4.4082	4.4617	4.4948	4.4787	4.4321
pos_10244	metab_10243	Osthenol	C14H14O3	HMDB0034130	2.89362	248.129	1.36331	0.951624	0.02414	0.1748	pos	4.4052	4.5084	4.2914	4.2152	4.0525	4.2007	4.0422	4.0844	3.9903	4.1547	4.114	4.0464
pos_10282	metab_10281	(S)-alpha-Amino-4-carboxy-3-furanpropanoic acid	C8H9NO5	HMDB0029414	2.8239	164.034	1.00759	1.03307	0.02799	0.1868	pos	4.1141	3.9161	4.0158	4.0984	4.001	3.9841	4.2064	4.1552	4.3081	4.0025	4.1271	4.129
pos_10447	metab_10446	3-methyl-2-nitrophenyl acetate	C9H9NO4	-	2.56137	196.061	1.2875	1.05048	0.04211	0.2242	pos	4.7389	5.0312	4.7305	4.6247	4.7166	4.6829	4.9639	4.668	4.9636	4.9424	5.2097	5.2142
pos_10521	metab_10520	8-{(1s,5r)-4-Oxo-5-[(2z)-2-penten-1-yl]-2-cyclopenten-1-yl}octanoic acid	C18H28O3	-	2.46152	356.219	1.79449	1.121	0.03907	0.2164	pos	3.2821	4.3622	3.7442	3.6501	3.889	3.3852	4.0938	3.8209	4.47	4.3323	4.1059	4.1885
pos_10745	metab_10744	Lucidenic acid A	C27H38O6	HMDB0037611	2.17208	472.278	4.74117	0.43636	0.01825	0.1519	pos	4.9665	3.7473	4.2415	4.6067	4.8868	4.5145	0.9744	0.0347	4.0992	0.0377	3.052	3.5651
pos_10834	metab_10833	Apocynin	C9H10O3	-	2.07172	167.07	1.15436	0.974481	0.001944	0.06432	pos	4.6741	4.6496	4.582	4.6507	4.657	4.531	4.5195	4.4603	4.5455	4.5211	4.5096	4.4786
pos_11061	metab_11060	Isopetasoside	C21H32O7	HMDB0029622	1.77188	379.208	2.70544	0.822027	0.04906	0.241	pos	5.9938	4.3082	5.4249	5.3043	5.1019	5.3568	4.9861	2.9953	3.5991	5.1117	4.5986	4.5913
pos_11188	metab_11187	(4R,5S,7R,11x)-11,12-Dihydroxy-1(10)-spirovetiven-2-one 12-glucoside	C21H34O8	HMDB0030895	1.61233	379.208	2.56226	0.839114	0.0465	0.2344	pos	5.9709	4.4224	5.1872	4.8895	5.0125	5.1354	4.9202	3.6906	3.2168	5.0596	4.3647	4.439
pos_11301	metab_11300	N6-Isopentenyladenosine	C15H21N5O4	-	1.43737	336.166	3.67174	1.71169	0.01647	0.1453	pos	2.9782	2.8776	1.7922	1.8128	2.9228	1.8291	5.1764	4.8517	2.0011	3.2814	4.5069	4.515
pos_11390	metab_11389	4-Pyridoxic acid	C8H9NO4	HMDB0000017	1.23122	184.061	1.30501	1.04924	0.04195	0.2239	pos	4.7862	4.8696	4.6834	4.6814	4.74	4.6287	4.7968	4.7204	5.2801	5.1412	4.912	4.9408
pos_11391	metab_11390	6-Lactoyltetrahydropterin	C9H13N5O3	HMDB0002065	1.22365	272.136	1.95886	1.08092	0.01039	0.118	pos	5.0657	5.3956	4.989	4.659	5.2763	5.2363	5.5832	5.535	5.434	5.6296	5.4117	5.5084
pos_12006	metab_12005	Isovalerylalanine	C8H15NO3	HMDB0000747	0.66145	174.113	1.28225	1.03502	0.006607	0.09975	pos	5.3806	5.4076	5.2711	5.431	5.4431	5.28	5.622	5.5599	5.7359	5.4573	5.4772	5.4881
pos_12165	metab_12164	Ethyl nitrite	C2H5NO2	HMDB0031239	0.609533	117.066	1.37651	1.04624	0.02791	0.1868	pos	4.5358	4.6551	4.688	4.6101	4.6919	4.8464	4.8492	4.9086	5.1898	4.886	4.8101	4.6775
pos_12281	metab_12280	DL-Ornithino-L-alanine	C8H17N3O4	HMDB0029448	0.56505	184.108	1.59638	1.06275	0.01043	0.1181	pos	5.0183	4.7894	4.823	4.5087	5.0198	4.8176	5.1457	5.2927	5.2667	4.9478	5.0986	5.0411
neg_36	metab_12543	Dihydro-3-coumaric acid	C9H10O3	-	4.04303	165.055	1.14546	0.977841	0.03833	0.2144	neg	6.8666	6.6855	6.5372	6.5233	6.6164	6.5755	6.5675	6.4635	6.3954	6.5577	6.4692	6.4661
neg_91	metab_12598	Adenine	C5H5N5	HMDB0000034	0.681433	134.046	2.11275	0.936064	0.0003083	0.03601	neg	6.4884	6.6327	6.5212	6.5671	6.8492	6.6355	6.233	6.3342	6.3696	6.1307	6.0543	6.0353
neg_135	metab_12642	Talaromycin A	C12H22O4	HMDB0030143	4.37798	275.151	2.29315	1.1116	0.00258	0.07087	neg	4.7199	5.1074	4.6932	4.6612	4.9002	4.7357	5.1053	5.1346	5.8287	5.386	5.2751	5.3019
neg_151	metab_12658	5C-aglycone	C16H16O4	HMDB0004810	4.5686	271.098	1.12761	0.981959	0.009709	0.1155	neg	7.1227	7.1579	7.0643	7.0638	7.1474	7.013	6.968	6.8312	6.9933	7.0735	6.9691	6.9641
neg_180	metab_12687	Tetradecanedioic acid	C14H26O4	LMFA01170018;HMDB0000872	6.17253	257.176	1.64939	1.03791	0.0005516	0.04184	neg	6.7527	6.9068	6.7851	6.8451	6.8266	6.7184	6.9447	7.0422	7.2292	7.1251	7.0266	7.0173
neg_239	metab_12746	D-Glucuronic acid	C6H10O7	HMDB0000127	0.796283	175.024	1.77684	1.07186	0.005501	0.09305	neg	4.9852	5.1101	4.8336	4.9021	5.1665	4.8919	5.371	5.1844	5.2138	5.7263	5.2681	5.2773
neg_240	metab_12747	()-4-Methylene-2-pyrrolidinecarboxylic acid	C6H9NO2	HMDB0029434	0.796283	172.061	1.22263	1.03423	0.008023	0.1071	neg	4.9529	5.0686	4.8593	5.0252	5.09	4.9751	5.1316	5.0502	5.1877	5.3339	5.1442	5.1481
neg_351	metab_12858	D-Myoinositol 4-phosphate	C6H13O9P	-	0.551917	259.023	1.47272	1.06613	0.04919	0.2414	neg	5.1187	4.7153	4.7866	4.3212	4.8338	4.7153	4.8867	5.4845	5.1462	4.9211	4.9306	5.0044
neg_722	metab_13229	Hydroxysuberic acid	C8H14O5	-	2.25015	189.077	1.20797	1.04323	0.01786	0.1509	neg	4.3337	4.5436	4.2639	4.4029	4.5271	4.2961	4.5894	4.4042	4.7096	4.7035	4.5345	4.5672
neg_837	metab_13344	DTMP	C10H15N2O8P	-	0.796283	321.05	1.34164	1.0317	0.04926	0.2416	neg	6.8016	7.3676	7.1846	6.9596	7.1098	7.1569	7.0724	7.4082	7.4201	7.2121	7.4111	7.4072
neg_1133	metab_13640	Alpha-Carboxy-delta-decalactone	C11H18O4	HMDB0030985	4.86668	259.119	1.49003	1.06065	0.006782	0.1005	neg	4.3388	4.5364	4.242	4.2594	4.4296	4.2082	4.5728	4.4185	4.8334	4.6716	4.5346	4.563
neg_1182	metab_13689	3-hydroxy-6-[(E)-2-methoxyethenyl]-7-methyl-2H-chromen-2-one	C13H12O4	HMDB0135798	5.08818	213.056	1.08116	0.973537	0.02036	0.1609	neg	4.704	4.5255	4.7538	4.5984	4.7246	4.5824	4.5523	4.5252	4.4747	4.5196	4.5325	4.547
neg_1202	metab_13709	(Z)-Resveratrol 4'-glucoside	C20H22O8	HMDB0030565	5.19032	389.125	1.50184	1.04569	0.008667	0.1104	neg	5.6478	5.5603	5.354	5.554	5.8107	5.5588	5.6647	5.7557	5.9996	5.8117	5.8899	5.8933
neg_1297	metab_13804	5-Hydroxy-2-(5-methyl-1-oxo-4-hexenyl)benzofuran	C15H16O3	HMDB0031925	4.5686	289.109	1.16557	0.977269	0.01102	0.1212	neg	6.1475	6.1846	6.0836	6.0785	6.1704	6.0232	5.9781	5.828	6.0049	6.0959	5.9761	5.9751
neg_1438	metab_13945	(6R,8Z)-6-Hydroxy-3-oxotetradecenoic acid	C14H24O4	HMDB0062363	6.14197	255.161	1.15841	1.02657	0.002943	0.07399	neg	5.7147	5.721	5.5919	5.6219	5.6237	5.6005	5.8346	5.6719	5.875	5.8453	5.7685	5.7798
neg_1717	metab_14224	DIMP	C10H13N4O7P	HMDB0006555	0.781117	331.046	2.19639	1.10137	0.01616	0.144	neg	5.3411	6.3169	5.3667	5.2122	5.6942	5.6887	6.2692	5.7713	6.2385	6.3121	6.2258	6.2086
neg_1720	metab_14227	PE(16:1(9Z)/18:0)	C39H76NO8P	LMGP02010524;HMDB0008958	7.24697	754.466	2.2121	0.883339	0.03303	0.2011	neg	5.8555	5.2883	6.3783	6.5379	5.2125	6.1631	4.9531	5.2117	4.696	5.7459	5.3899	5.3065
neg_1763	metab_14270	Deoxyadenosine monophosphate	C10H14N5O6P	HMDB0000905	0.742967	330.062	2.13436	1.07419	0.01498	0.1378	neg	5.8657	6.6829	6.7794	6.4664	6.2318	6.4727	6.614	6.9625	6.9562	6.8224	7.0012	6.9935
neg_1784	metab_14291	PS(14:0/16:1(9Z))	C36H68NO10P	LMGP03010929;HMDB0012333	8.02377	704.453	2.62335	0.852895	0.01231	0.1267	neg	5.7487	5.0928	6.0865	6.4053	5.0235	5.9441	4.5635	5.0426	4.4939	5.3798	4.8793	4.8972
neg_1785	metab_14292	PS(16:1(9Z)/16:1(9Z))	C38H70NO10P	LMGP03010964;HMDB0012366	8.0469	730.469	2.6522	0.876503	0.007906	0.1064	neg	6.6331	5.8582	6.6646	6.9225	5.7594	6.593	5.6064	5.4855	5.1943	6.0421	5.6935	5.6633
neg_2482	metab_14989	Glyceric acid	C3H6O4	HMDB0000139	0.63565	105.018	1.4819	1.03811	0.009127	0.1126	neg	6.0989	6.1247	5.9758	5.8651	6.256	6.1999	6.2355	6.4294	6.41	6.2739	6.2768	6.2887
neg_2670	metab_15177	Deoxyuridine monophosphate (dUMP)	C9H13N2O8P	-	0.742967	307.035	1.49857	1.05067	0.03172	0.1979	neg	5.6353	6.1033	5.7451	5.4402	5.8565	5.7983	5.8411	5.8524	6.2535	6.2296	6.0735	6.0799
neg_2702	metab_15209	Gladiatoside C2	C29H26O12	HMDB0036254	0.765933	547.121	1.43613	0.964188	0.001638	0.0602	neg	5.7851	5.9807	5.9081	5.7818	5.7627	5.7997	5.4958	5.7091	5.5869	5.6943	5.6784	5.5967
neg_2949	metab_15456	1-Deoxy-D-xylulose 5-phosphate	C5H11O7P	HMDB0001213	1.04567	195.006	1.91219	1.0966	0.01564	0.1412	neg	3.9794	4.3996	3.996	3.7836	4.5041	4.186	4.5138	4.564	4.536	4.4826	4.565	4.5835
neg_3241	metab_15748	Enokipodin C	C15H20O4	HMDB0040119	1.66665	285.11	1.08965	1.04594	0.04544	0.2318	neg	4.0492	4.1246	3.8436	3.9422	4.2429	3.9583	4.3544	3.9776	4.3513	4.181	4.199	4.2112
neg_3374	metab_15881	Codeine-6-glucuronide	C24H29NO9	HMDB0060464	1.88042	474.175	2.54491	1.31316	0.0445	0.2297	neg	3.6344	2.599	3.7938	2.6011	3.4846	2.6236	3.9743	2.6116	5.0702	3.8855	4.5145	4.5517
neg_3568	metab_16075	7-hydroxy-6-(3-oxobutyl)-2H-chromen-2-one	C13H12O4	HMDB0128959	2.22635	231.067	1.63455	0.928915	0.04869	0.2402	neg	4.6771	4.2075	4.1606	4.2592	4.7268	4.1347	4.3556	3.9135	4.0368	3.9093	4.232	3.8579
neg_3624	metab_16131	L-Nicotianine	C10H12N2O4	HMDB0029397	2.28842	205.062	1.23515	1.05012	0.02971	0.1918	neg	4.1625	3.9786	4.17	4.376	4.2466	4.0887	4.5532	4.1686	4.4583	4.2247	4.4379	4.43
neg_3634	metab_16141	3-Furanmethanol glucoside	C11H16O7	HMDB0032924	2.29603	305.088	2.72415	0.755284	0.01655	0.1454	neg	3.8607	3.0714	3.2728	4.0333	3.6076	3.7317	2.4408	1.9508	2.1791	3.0199	3.1942	3.5115
neg_3716	metab_16223	Hydroxytorsemide	C16H20N4O4S	HMDB0060982	2.40798	345.099	1.69061	0.936775	0.0142	0.1344	neg	4.7687	4.5095	4.5128	4.4538	4.7993	4.3802	4.4988	4.0978	4.2789	4.3069	4.4177	4.0942
neg_3769	metab_16276	Alpha-Cyano-4-hydroxycinnamic acid	C10H7NO3	-	2.54298	188.035	1.49356	1.04316	0.002959	0.0741	neg	5.4623	5.7016	5.3883	5.4656	5.6181	5.4476	5.7589	5.6264	5.869	5.7692	5.7441	5.7452
neg_3780	metab_16287	Ethyl nicotinate	C8H9NO2	HMDB0059846	2.55895	132.045	2.40492	1.1495	0.0002604	0.03507	neg	3.4992	3.7327	3.5132	3.4258	3.3525	3.5092	3.9154	4.1539	4.2796	3.7625	4.0503	4.0116
neg_3790	metab_16297	Aflatoxin B2	C17H14O6	HMDB0035208	2.56695	359.078	1.41077	0.95626	0.005328	0.09228	neg	4.3679	4.3279	4.4187	4.2995	4.3746	4.1393	4.1434	4.0496	4.2068	4.1779	4.209	4.0048
neg_3848	metab_16355	2-Propionylpyrrole	C7H9NO	HMDB0032492	2.71083	168.066	1.13395	1.04593	0.03785	0.2133	neg	4.0623	4.2155	3.9811	4.1611	4.3564	4.0433	4.4386	4.0656	4.442	4.3717	4.3157	4.3271
neg_3917	metab_16424	3,4,5-trihydroxy-6-(3-methoxyphenoxy)oxane-2-carboxylic acid	C13H16O8	HMDB0135642	2.86303	281.068	1.36854	0.946658	0.04184	0.2237	neg	4.2861	4.6424	4.7731	4.3475	4.2563	4.3532	4.2373	4.1507	4.1778	4.3889	4.1339	4.1489
neg_3974	metab_16481	Desmethyldeschlorobenzoyl Indomethacin	C10H9NO3	-	2.98295	190.051	1.70353	1.08573	0.03184	0.1983	neg	4.8839	4.7334	4.1937	4.6416	5.177	4.7166	5.4666	4.9121	5.3065	4.9565	5.1085	5.021
neg_4115	metab_16622	Methyl 3,4-dihydroxy-5-prenylbenzoate 3-glucoside	C19H26O9	HMDB0040121	3.29412	379.142	2.62537	1.31567	0.01096	0.1212	neg	3.4612	3.039	1.9327	2.7442	2.3749	2.6415	4.1987	3.1616	3.117	3.6016	3.6081	3.6194
neg_4208	metab_16715	Hydroxygaleon	C20H22O5	HMDB0031535	3.44492	363.121	1.1239	1.04391	0.03092	0.1957	neg	4.2742	4.389	4.0804	4.1463	4.3059	4.0837	4.4613	4.2871	4.6258	4.3116	4.3322	4.3708
neg_4247	metab_16754	6-Hydroxymusizin 8-O-b-D-glucopyranoside	C19H22O9	HMDB0030817	3.52492	375.11	1.61816	0.953543	0.001609	0.06004	neg	5.2385	5.0055	5.1632	5.1262	5.2062	5.0011	5.0322	4.8573	4.7781	4.8316	4.9533	4.8562
neg_4264	metab_16771	Lumichrome	C12H10N4O2	-	3.55688	241.074	1.31477	0.946446	0.04982	0.2432	neg	4.3939	4.1477	3.9965	3.9382	3.7837	4.0501	3.8124	3.9322	3.7862	3.8958	3.7713	3.8099
neg_4323	metab_16830	5-hydroxy-7-methoxy-3-(3-methoxyphenyl)-8-methyl-4H-chromen-4-one	C18H16O5	HMDB0129576	3.67688	357.099	1.11788	0.976752	0.02379	0.1733	neg	5.7184	5.8347	5.6834	5.5327	5.6891	5.6082	5.5585	5.5705	5.4917	5.5709	5.5502	5.5332
neg_4379	metab_16886	6-hydroxy-7,8-dimethoxy-2-phenyl-3,4-dihydro-2H-1-benzopyran-4-one	C17H16O5	HMDB0133299	3.7798	345.099	1.4373	0.964506	0.03086	0.1955	neg	6.3207	6.2213	6.0694	5.9889	6.4199	5.999	6.0906	5.8104	5.9758	5.9795	5.9771	5.8709
neg_4402	metab_16909	Wyerol	C15H16O4	HMDB0039142	3.8194	259.098	1.53328	0.951291	0.007059	0.1018	neg	4.8746	4.6992	4.6793	4.7938	4.8574	4.6753	4.754	4.4993	4.4483	4.4005	4.6326	4.451
neg_4430	metab_16937	2-phenyl-3,4-dihydro-2H-1-benzopyran-3,5,7-triol	C15H14O4	HMDB0132266	3.87535	303.088	1.64946	0.940823	0.001169	0.05535	neg	4.2683	4.0602	4.2141	4.0998	4.2704	4.032	3.8786	3.9707	3.8649	3.8234	3.9547	3.9719
neg_4511	metab_17018	Phomopsin B	C36H46N6O12	HMDB0038884	4.04303	791.266	1.44267	1.06135	0.03931	0.2169	neg	4.9113	4.8525	4.8146	4.5335	5.1205	4.9111	5.1701	4.8334	5.06	5.5687	5.1154	5.1846
neg_4556	metab_17063	3-(4-Hydroxyphenyl)-1-(4-hydroxy-2-methoxyphenyl)-2-propen-1-one	C16H14O4	HMDB0037319	4.12913	315.089	1.17647	0.968344	0.04335	0.2273	neg	4.8609	4.8567	4.724	4.6176	4.939	4.6189	4.7118	4.5252	4.6385	4.6422	4.6052	4.5926
neg_4613	metab_17120	9-(2,3-dihydroxypropoxy)-9-oxononanoic acid	C12H22O6	-	4.25002	261.135	1.73431	1.06632	0.006637	0.09977	neg	5.129	5.4085	5.0111	4.9946	5.2273	5.082	5.3903	5.2981	5.8183	5.5733	5.3951	5.4252
neg_4743	metab_17250	6,8-dimethyl-2-phenyl-3,4-dihydro-2H-1-benzopyran-4,5,7-triol	C17H18O4	HMDB0130572	4.48202	267.103	1.18265	0.968395	0.007941	0.1066	neg	4.4601	4.3878	4.4255	4.2898	4.4997	4.3249	4.2562	4.1621	4.2974	4.3497	4.2388	4.2484
neg_4884	metab_17391	(-)-Wikstromol	C20H22O7	HMDB0030598	4.72322	373.13	1.11673	0.969608	0.02915	0.1902	neg	4.8118	4.9753	4.7834	4.6753	4.6437	4.7351	4.633	4.6707	4.5427	4.6613	4.6336	4.6148
neg_4898	metab_17405	3-Hydroxy-2-(4-methylbenzoyl)-4H-1-benzopyran-4-one	C17H12O4	HMDB0031969	4.75488	325.073	1.42614	0.950457	0.02575	0.1804	neg	4.6718	4.8881	4.7508	4.5102	4.8054	4.5923	4.6061	4.5068	4.1498	4.5871	4.447	4.5203
neg_4901	metab_17408	3-(2-hydroxyphenyl)-1-(4-methoxyphenyl)propan-1-one	C16H16O3	HMDB0135613	4.76288	237.093	1.45865	0.948334	0.01587	0.1426	neg	4.3804	4.5638	4.4382	4.2762	4.5277	4.2914	4.3271	4.1759	3.9046	4.2942	4.2044	4.2015
neg_4928	metab_17435	2,3-dimethoxy-4-[(2E)-3-phenylprop-2-en-1-yl]phenol	C17H18O3	HMDB0130347	4.81125	315.125	1.32334	0.971338	0.003978	0.08197	neg	5.9613	6.0864	5.9449	5.9414	5.9721	5.8914	5.8425	5.7763	5.669	5.9358	5.768	5.778
neg_4983	metab_17490	Ginkgolide C	C20H24O11	LMPR0104540003;HMDB0036860	4.90548	421.114	1.19918	1.03933	0.04968	0.2428	neg	4.6798	4.4777	4.4179	4.7779	4.4023	4.7046	4.8509	4.8992	4.7354	4.7309	4.6037	4.7245
neg_4996	metab_17503	4'-Methoxychalcone	C16H14O2	HMDB0032585;LMPK12120188	4.93587	283.098	1.16296	0.974712	0.009898	0.1164	neg	5.4324	5.3953	5.398	5.2654	5.4754	5.2998	5.301	5.2163	5.1389	5.3249	5.2331	5.2395
neg_5124	metab_17631	(E)-3-(Tetrahydro-5,5-dimethyl-2-furanyl)-2-buten-1-ol	C10H18O2	HMDB0035839	5.08818	215.129	1.37191	1.04592	0.003446	0.07794	neg	4.392	4.4603	4.2801	4.343	4.3398	4.316	4.5365	4.4402	4.7384	4.5965	4.4974	4.5217
neg_5211	metab_17718	(1R,2R,4R,8R)-p-Menthane-2,8,9-triol	C10H20O3	HMDB0033574	5.2368	169.123	2.0518	1.10249	0.0002185	0.03327	neg	4.162	3.8656	3.8668	4.0184	4.0423	3.9293	4.5584	4.26	4.5552	4.332	4.3044	4.3219
neg_5219	metab_17726	Pyrrhoxanthinol	C37H46O5	HMDB0035696	5.26097	607.28	1.28525	0.960693	0.02845	0.1882	neg	4.8748	5.1515	4.8638	4.8607	5.1545	4.8633	4.819	4.6812	4.9657	4.7136	4.7117	4.7066
neg_5226	metab_17733	3-Hydroxyisovalerylcarnitine	C12H24NO5+	HMDB0061189;LMFA07070041	5.27017	297.134	1.28616	1.05821	0.03693	0.21	neg	3.9847	4.2279	3.76	4.0481	4.2299	3.9728	4.342	4.0535	4.5069	4.3532	4.2005	4.1782
neg_5240	metab_17747	(S)-9-Hydroxy-10-undecenoic acid	C11H20O3	LMFA01050436;HMDB0032662	5.2862	245.14	1.70073	1.05351	0.003565	0.07888	neg	5.8109	5.9231	5.617	5.7114	5.9355	5.763	6.0098	5.9963	6.3842	6.1809	6.0136	6.0306
neg_5243	metab_17750	Indoxyl glucuronide	C14H15NO7	HMDB0010319	5.2862	344.057	2.07134	1.11346	0.001554	0.05993	neg	3.5452	3.4722	3.4279	3.5018	3.6957	3.615	3.7184	3.9044	4.2739	3.9658	3.9091	3.9013
neg_5284	metab_17791	1-Hydroxy-3-nonanone	C9H18O2	HMDB0037143;LMFA05000601	5.36745	203.129	2.47582	1.14817	0.0007518	0.04694	neg	3.7032	3.8316	3.6745	3.6693	3.7698	3.7868	4.1608	4.0304	4.5224	4.5538	4.2378	4.2507
neg_5318	metab_17825	Xanthurenic acid	C10H7NO4	HMDB0000881	5.43235	204.03	1.81221	1.07963	0.004386	0.08586	neg	4.1968	4.4726	4.0023	4.3544	4.0481	4.1678	4.6618	4.5157	4.5964	4.5233	4.4636	4.4916
neg_5337	metab_17844	4-tert-Butylphenyl salicylate	C17H18O3	HMDB0041314	5.48768	315.125	1.60082	1.05588	0.02983	0.192	neg	5.1315	5.5378	5.2984	5.2173	5.0398	5.5601	5.4692	5.6466	5.2654	5.6922	5.7351	5.7489
neg_5358	metab_17865	(1R,2R,3S,1'R)-Nepetalinic acid	C10H16O4	HMDB0034971	5.53678	245.103	2.3644	1.165	0.0003284	0.03656	neg	3.2914	3.6369	3.1357	3.2574	3.2803	3.2147	3.9022	3.512	4.0265	3.9636	3.8206	3.8608
neg_5363	metab_17870	15(R)-hydroperoxy-EPE	C8H18N2O4S	HMDB0062295	5.54457	283.098	1.88379	0.915337	0.002181	0.06716	neg	4.0648	4.0492	3.9482	3.9965	4.3389	4.0543	3.8709	3.5219	3.6093	3.6532	3.857	3.8679
neg_5369	metab_17876	Canesceol	C29H44O11	HMDB0034084	5.55228	589.269	1.13287	0.971095	0.02842	0.1881	neg	5.1569	5.3994	5.1226	5.1759	5.3345	5.1565	5.187	4.9972	5.1745	4.9919	5.0434	5.0463
neg_5386	metab_17893	Aerobactin	C22H36N4O13	HMDB0004051	5.55997	599.2	1.34979	0.969877	0.0004632	0.04019	neg	5.267	5.2205	5.2066	5.1238	5.2752	5.1779	5.0668	5.0713	5.0269	5.0833	5.0195	5.0618
neg_5436	metab_17943	1-(4-hydroxyphenyl)pentan-3-one	C11H14O2	HMDB0132981	5.66362	223.098	1.4658	1.07207	0.005652	0.09361	neg	3.2017	3.2748	3.1575	3.2622	3.3213	3.1834	3.4633	3.2334	3.5939	3.5914	3.4399	3.4742
neg_5456	metab_17963	Isorhamnetin	C16H12O7	HMDB0002655;LMPK12110002	5.69692	315.052	1.23648	0.964012	0.04116	0.222	neg	4.8829	4.7251	4.745	4.462	4.781	4.5775	4.5811	4.5623	4.4544	4.472	4.5923	4.5019
neg_5973	metab_18480	3-Oxotetradecanoic acid	C14H26O3	HMDB0010730	6.13433	287.187	3.15458	1.16716	3.372e-06	0.008812	neg	5.0144	5.3511	4.9823	5.038	4.928	4.981	5.6582	6.0739	5.8935	6.0845	5.8137	5.8365
neg_6063	metab_18570	2-(2,6-dihydroxy-3,4-dimethoxycyclohexylidene)acetonitrile	C10H15NO4	HMDB0125517	6.21117	194.082	1.0222	1.01859	0.004921	0.09005	neg	5.3076	5.272	5.33	5.3661	5.2805	5.3957	5.3788	5.5001	5.4056	5.3775	5.4479	5.4369
neg_6145	metab_18652	FA(18:1(OH1))	C18H34O3	-	6.28793	343.25	1.11247	1.03187	0.01749	0.1489	neg	4.8297	5.1005	5.0207	4.8918	4.864	4.8492	5.1667	5.0287	5.0569	5.1895	5.0185	5.0404
neg_6226	metab_18733	Ac-Ser-Asp-Lys-Pro-OH	C20H33N5O9	HMDB0062552	6.34118	524.173	1.22659	0.959435	0.04369	0.228	neg	5.5344	5.4519	5.5079	5.5471	5.1168	5.5323	5.0681	5.2568	5.165	5.5439	5.1619	5.167
neg_6514	metab_19021	Alpha-Hydroxy-tamoxifen-O-glucuronide	C32H37NO8	HMDB0060808	6.71568	584.223	3.47161	0.773527	0.0008254	0.04854	neg	5.7553	5.0183	5.2132	5.3558	4.3951	5.3138	4.028	3.821	3.741	4.725	3.5834	4.1216
neg_6548	metab_19055	Cyclostenol	C28H48O2	HMDB0034401	6.75387	461.365	1.37301	1.04488	0.01541	0.1403	neg	5.3968	5.1266	5.5167	5.1707	5.1201	5.2182	5.5932	5.309	5.5054	5.4929	5.5256	5.5361
neg_6810	metab_19317	PE-NMe2(14:0/14:1(9Z))	C35H68NO8P	HMDB0113839	7.1856	642.452	2.20142	0.853609	0.03879	0.2157	neg	4.9056	4.5515	5.3443	5.448	3.8672	5.2314	3.6848	4.2591	3.6829	4.6682	4.4011	4.354
neg_6908	metab_19415	PG(16:0/16:1(9Z))	C38H73O10P	LMGP04010910;HMDB0010571	7.40132	755.462	3.59819	0.697368	0.01133	0.1227	neg	5.0638	4.7702	5.4113	5.5886	3.9244	5.3401	2.6419	2.5988	2.64	4.7164	4.3443	4.0451
neg_7068	metab_19575	PE(18:4(6Z,9Z,12Z,15Z)/22:6(4Z,7Z,10Z,13Z,16Z,19Z))	C45H70NO8P	HMDB0009210;LMGP02010768	8.06227	820.439	3.04775	0.816407	0.005335	0.0923	neg	5.8619	5	5.8861	6.1331	4.8091	5.8057	4.5541	4.1899	3.9237	5.19	4.7337	4.7547
neg_7824	metab_20324	PE(16:1(9Z)/P-16:0)	C37H72NO7P	HMDB0008982	7.70823	672.5	3.25785	0.813973	0.001571	0.06004	neg	5.7951	5.9488	6.3957	6.7094	5.3528	6.4702	4.5457	5.024	4.5705	5.5738	5.1004	5.0376
neg_7944	metab_20444	PE(16:1(9Z)/16:0)	C37H72NO8P	LMGP02010520;HMDB0008956	7.40132	670.484	2.48691	0.883141	0.01304	0.1298	neg	6.5346	6.2703	6.9048	7.1294	5.732	6.8579	5.4864	5.7986	5.4426	6.2653	5.9629	5.868
neg_8133	metab_20633	9-Oxoasimicinone	C37H64O8	HMDB0032949	7.01612	657.434	1.98423	0.914621	0.01817	0.1519	neg	5.3897	5.6723	5.4398	5.3512	4.9206	5.4829	5.3989	4.4583	4.7686	4.9834	4.9181	4.9729
neg_8764	metab_21264	LysoPE(16:1(9Z)/0:0)	C21H42NO7P	HMDB0011504	6.37162	450.264	2.41382	0.907165	0.006266	0.09746	neg	7.1636	6.6131	6.8351	7.0394	6.243	6.8875	6.2839	5.872	5.8622	6.6799	6.1639	6.1356
neg_8922	metab_21422	LysoPE(0:0/14:1(9Z))	C19H38NO7P	LMGP02050034;HMDB0011471	6.26507	422.233	1.80607	0.926935	0.009981	0.1168	neg	5.282	5.0417	5.0468	5.2374	4.6678	5.1065	4.7182	4.5084	4.7114	5.0255	4.574	4.6289
neg_9023	metab_21523	N-Acetyl-9-O-lactoylneuraminic acid	C14H23NO11	HMDB0000768	6.18017	402.099	1.54333	1.04583	0.001578	0.06004	neg	4.9109	4.8667	4.9057	5.0671	4.9342	4.9	4.9863	5.2162	5.2835	5.1935	5.134	5.1254
neg_9030	metab_21530	()13-HpODE	C18H32O4	-	6.18017	311.224	1.01735	1.02049	0.03894	0.216	neg	7.029	7.0081	7.0007	6.929	6.9422	6.9567	7.1836	6.8838	7.204	7.2383	7.1142	7.1039
neg_9042	metab_21542	Dehydroisoandrosterone sulfate	C19H28O5S	-	6.17253	413.164	1.46512	1.05259	0.01498	0.1378	neg	5.3689	5.1145	5.1358	5.2308	5.5493	5.2003	5.7892	5.4727	5.6886	5.3491	5.5039	5.4615
neg_9217	metab_21717	4-Hydroxypropofol	C12H18O2	HMDB0014018	6.08865	239.129	1.43326	1.04511	0.001522	0.05978	neg	4.8394	4.9664	4.7968	4.7636	4.9496	4.8147	5.1496	4.9365	5.1378	5.1663	5.0153	5.0392
neg_9271	metab_21771	2-Carboxy-4-dodecanolide	C13H22O4	HMDB0030987	6.06585	223.134	1.48517	1.03896	0.0007696	0.04721	neg	5.194	5.3375	5.1913	5.2247	5.1937	5.2723	5.3855	5.3903	5.6016	5.4462	5.3957	5.4226
neg_9273	metab_21773	FA(12:1(OH1))	C12H22O3	-	6.06585	213.15	1.38431	1.05593	0.006818	0.1005	neg	4.1613	4.208	4.0552	3.9492	4.2359	4.0652	4.3805	4.1564	4.4204	4.5129	4.2724	4.3104
neg_9306	metab_21806	Azelaic acid	C9H16O4	LMFA01170054;HMDB0000784	6.0505	169.086	1.92511	1.08129	0.001002	0.0522	neg	4.1829	4.3244	4.2217	4.2688	4.1987	4.2692	4.62	4.3744	4.6319	4.7999	4.5469	4.5601
neg_9360	metab_21860	MG(14:1(9Z)/0:0/0:0)	C17H32O4	HMDB0011562	6.01995	345.229	1.08629	1.02569	0.03185	0.1984	neg	6.3043	6.5169	6.2079	6.267	6.4529	6.3129	6.5118	6.3895	6.5637	6.6942	6.4372	6.4478
neg_9674	metab_22174	Batatasin III	C15H16O3	HMDB0030636	5.83302	289.109	1.05325	0.97348	0.01648	0.1453	neg	4.6358	4.7731	4.6447	4.6179	4.576	4.582	4.5995	4.5035	4.3754	4.5551	4.5204	4.5384
neg_9791	metab_22291	Artabsinolide D	C15H22O5	HMDB0034941	5.73672	263.13	1.36917	1.06347	0.02844	0.1881	neg	3.9565	4.1151	3.8148	4.1525	4.2912	3.9665	4.4967	4.0573	4.5004	4.164	4.2966	4.3182
neg_9853	metab_22353	Kanzonol F	C26H28O5	HMDB0040608	5.63955	465.194	1.23904	0.958896	0.0351	0.2063	neg	4.8289	5.3592	5.0121	4.9879	4.9756	5.0503	4.7858	4.8548	4.8181	4.6845	4.9048	4.9265
neg_9875	metab_22375	2-nonenoylglycine	C11H19NO3	HMDB0094807	5.60707	212.129	1.93788	1.1161	0.003674	0.07962	neg	3.5442	3.7613	3.3708	3.5923	3.7593	3.4707	4.0562	3.6266	4.0802	4.2755	3.9769	3.9806
neg_9893	metab_22393	Austinol	C25H30O8	HMDB0034464	5.56763	479.173	1.09456	0.972498	0.03852	0.2149	neg	6.113	6.2563	6.4462	6.2363	6.1644	6.3102	5.994	6.0586	5.8828	6.2596	6.1344	6.1611
neg_9900	metab_22400	3,4-Dihydroxyphenylpropanoate	C9H10O4	-	5.56763	181.05	1.07833	0.97586	0.02573	0.1804	neg	5.2852	5.3136	5.2609	5.1624	5.3834	5.1609	5.1695	5.0619	5.0685	5.279	5.1102	5.1133
neg_9930	metab_22430	Salicyluric acid	C9H9NO4	HMDB0000840	5.55228	194.046	1.57544	1.06117	0.0009497	0.05088	neg	3.7302	3.9229	3.9396	3.8683	3.7339	3.8577	4.0462	4.0304	4.2348	4.1125	4.0114	4.0267
neg_9968	metab_22468	[6]-Dehydrogingerdione	C17H22O4	HMDB0029474	5.48768	271.135	1.7642	1.07538	0.005117	0.09094	neg	3.8456	4.2809	4.0078	3.9762	3.9476	4.2188	4.2318	4.2973	4.2381	4.44	4.4316	4.4642
neg_9985	metab_22485	4-(3-hydroxybutyl)-2-methoxyphenol	C11H16O3	HMDB0135672	5.46415	241.109	1.78527	1.07703	0.001205	0.05535	neg	4.0435	4.2981	4.1273	4.0988	4.2049	4.0757	4.4152	4.278	4.6339	4.616	4.4088	4.4103
neg_10093	metab_22593	Alanyl-Asparagine	C7H13N3O4	HMDB0028682	5.27817	405.172	1.57245	0.949176	0.02862	0.1888	neg	6.0161	5.449	5.6117	5.8119	6.0165	5.684	5.4276	5.2269	5.6401	5.6285	5.4303	5.4807
neg_10151	metab_22651	Alectrol	C19H22O6	HMDB0041372	5.1827	327.125	2.04626	0.866199	0.0286	0.1888	neg	4.2977	4.3874	4.4786	4.123	3.2863	4.2267	3.3447	3.7232	3.3428	3.3047	3.916	3.8487
neg_10222	metab_22722	Osmundalin	C12H18O8	HMDB0031304	5.09602	325.071	1.30295	0.966031	0.002954	0.07407	neg	4.8015	4.8271	4.7954	4.6246	4.84	4.728	4.6666	4.6653	4.5334	4.5613	4.6216	4.5961
neg_10321	metab_22821	Sebacic acid	C10H18O4	LMFA01170006;HMDB0000792	5.0202	201.113	1.00548	1.02924	0.03954	0.2173	neg	4.9717	5.1189	4.9417	5.0196	5.1438	4.9681	5.2101	4.9785	5.3045	5.2915	5.1226	5.1341
neg_10366	metab_22866	3-Methoxybenzenepropanoic acid	C10H12O3	HMDB0011751	4.95895	179.071	1.3258	0.969572	0.003267	0.07615	neg	5.4285	5.2958	5.335	5.2159	5.4076	5.2631	5.2705	5.1433	5.1375	5.1236	5.1435	5.1528
neg_10407	metab_22907	(R)-Bitalin A	C13H14O3	HMDB0040358	4.93587	199.076	1.20862	0.975897	0.003427	0.07782	neg	5.8222	5.7474	5.8012	5.6861	5.8429	5.6999	5.6722	5.6104	5.5249	5.697	5.6421	5.6238
neg_10459	metab_22959	11,12,13-Trinor-1(10)-spirovetivene-2,7-dione	C12H16O2	HMDB0036734	4.86668	237.114	1.54972	1.09213	0.03718	0.211	neg	3.624	3.6406	3.5619	3.3408	3.7499	3.5062	3.7279	3.5782	3.8636	4.4113	3.8429	3.975
neg_10478	metab_22978	Narceinone	C23H25NO9	HMDB0038598	4.8429	480.132	1.39153	0.945683	0.04722	0.2368	neg	4.6585	5.1709	4.8617	5.02	5.0682	4.8263	4.8006	4.7256	5.0085	4.4204	4.4858	4.5566
neg_10486	metab_22986	L-cis-Cyclo(aspartylphenylalanyl)	C13H14N2O4	HMDB0031360	4.835	307.096	1.24684	0.968013	0.005261	0.09164	neg	4.741	4.835	4.7156	4.6448	4.8681	4.7066	4.7066	4.5883	4.6	4.5746	4.5693	4.562
neg_10555	metab_23055	2-(4-Methoxyphenyl)naphthalic anhydride	C19H12O4	HMDB0032909	4.72322	349.07	1.09731	0.977909	0.0005897	0.04299	neg	4.805	4.7508	4.7604	4.7269	4.7442	4.7311	4.6882	4.5947	4.6232	4.6999	4.655	4.6243
neg_10598	metab_23098	Methyl caprylate	C9H18O2	HMDB0031291	4.69242	203.129	1.45398	1.05738	0.003831	0.08057	neg	3.5972	3.7282	3.6599	3.6649	3.5461	3.7644	3.8284	3.7064	4.0188	3.9504	3.8455	3.8701
neg_10724	metab_23224	5-Pentyltetrahydro-2-oxo-3-furancarboxylic acid	C10H16O4	HMDB0030989	4.5531	245.103	1.04411	1.03826	0.04988	0.2432	neg	4.4325	4.5118	4.3731	4.4661	4.6697	4.3587	4.7035	4.4017	4.7682	4.7977	4.565	4.6033
neg_10755	metab_23255	Gibberellin A59	C19H20O7	HMDB0035051	4.51375	381.097	1.76126	0.917025	0.0149	0.1375	neg	3.9924	4.7744	4.3762	4.4178	4.5348	4.4425	3.897	4.0936	3.9857	4.1584	4.1245	4.0784
neg_10792	metab_23292	Pratenol A	C14H12O5	HMDB0040630	4.45807	259.062	1.2579	0.953664	0.04308	0.2269	neg	4.298	4.0358	4.1948	4.1651	4.5265	4.1583	4.0241	3.8193	4.0729	4.0307	4.1316	4.1252
neg_10909	metab_23409	(2RS,5RS)-(E)-2-(2-Phenylethenyl)-1,3-dioxan-5-ol	C12H14O3	HMDB0031973	4.29798	187.076	1.56664	0.948005	0.005322	0.09228	neg	4.5678	4.494	4.4076	4.3327	4.6378	4.3297	4.3002	4.1185	4.2524	4.3008	4.295	4.1131
neg_10956	metab_23456	1-Hydroxypropan-2-yl 2-isopropyl-5-methylcyclohexyl carbonate	C14H26O4	HMDB0059947	4.21792	303.182	1.52331	1.05752	0.00964	0.1154	neg	4.6715	4.8691	4.5849	4.6606	4.8382	4.6427	4.9755	4.8315	5.305	4.9562	4.9083	4.9136
neg_10967	metab_23467	N-formylanthranilic acid	C8H7NO3	-	4.20177	164.035	2.33257	1.12309	0.0001295	0.02833	neg	3.8335	4.278	3.8982	3.9478	3.9688	4.0051	4.5688	4.3283	4.5308	4.5834	4.4546	4.4123
neg_10999	metab_23499	P-Tolyl phenylacetate	C15H14O2	HMDB0041564	4.1372	271.099	1.35175	0.963258	0.006867	0.1007	neg	4.7918	4.854	4.7763	4.6038	4.8727	4.6819	4.6302	4.5707	4.5286	4.6661	4.5767	4.558
neg_11004	metab_23504	15-deoxy-delta-12,14-PGJ2	C20H28O3	LMFA03010021	4.12913	315.194	2.3212	1.25407	0.0441	0.2288	neg	2.9979	3.032	2.8193	2.9827	3.0603	2.818	4.8436	2.9346	3.5103	3.1038	3.9271	3.8943
neg_11134	metab_23634	Cis-4-Hydroxycyclohexylacetic acid	C8H14O3	HMDB0000451	3.9555	157.086	1.54157	1.06873	0.01177	0.1235	neg	3.864	3.9735	3.8115	3.8435	3.973	3.847	4.1036	3.9866	4.4915	4.1538	4.0837	4.0901
neg_11136	metab_23636	Coriandrone B	C16H20O5	HMDB0037775	3.94755	273.114	1.77548	1.08168	0.001125	0.05469	neg	3.9851	4.2134	3.9187	3.8558	3.98	3.9209	4.2785	4.0696	4.4353	4.3498	4.3342	4.3569
neg_11157	metab_23657	3,4-DHPEA-EA	C19H22O8	HMDB0029304	3.90753	359.115	1.23652	0.970857	0.006797	0.1005	neg	5.1519	5.2933	5.1625	5.1122	5.0411	5.1181	4.9928	5.0006	4.9771	5.0088	4.9952	5.0071
neg_11165	metab_23665	3-Hydroxybenzaldehyde	C7H6O2	-	3.8914	243.067	1.51051	0.943209	0.01371	0.1322	neg	4.2004	4.5	4.1492	4.0569	4.3168	4.1328	4.0499	3.8106	4.0178	4.1022	4.0144	3.9209
neg_11172	metab_23672	5,7-Dihydroxy-4'-methoxy-8-methylflavanone	C17H16O5	HMDB0041321;LMPK12140352	3.86733	345.099	1.22465	0.976544	0.009224	0.1132	neg	6.3073	6.3545	6.2598	6.1725	6.3545	6.1548	6.1491	6.0453	6.058	6.2306	6.1269	6.1084
neg_11184	metab_23684	16,17-Dihydro-16a,17-dihydroxygibberellin A7 17-glucoside	C25H34O12	HMDB0040649	3.84333	547.185	2.46797	1.17958	0.01157	0.1232	neg	3.5086	4.0394	3.9489	3.6611	2.9273	3.8305	3.9165	4.1402	4.8635	4.1948	4.3536	4.3824
neg_11194	metab_23694	3,5,7-trihydroxy-2-(1-hydroxy-3-methoxy-4-oxocyclohexyl)-4H-chromen-4-one	C16H16O8	HMDB0126514	3.83535	317.068	1.08358	0.971807	0.03521	0.2065	neg	4.768	4.8105	4.8022	4.6338	4.8506	4.6556	4.6356	4.4488	4.5913	4.7639	4.6374	4.6376
neg_11203	metab_23703	6-Hydroxy-2,6-dimethyl-2,7-octadien-4-one	C10H16O2	HMDB0034670	3.8194	213.113	1.0755	1.0365	0.02456	0.1764	neg	4.1906	4.3331	4.1084	4.1793	4.319	4.1864	4.4137	4.2259	4.5562	4.3877	4.323	4.3336
neg_11339	metab_23839	6-(4-ethenyl-3-hydroxyphenoxy)-3,4,5-trihydroxyoxane-2-carboxylic acid	C14H16O8	HMDB0126429	3.629	293.068	2.10728	1.11674	0.002191	0.06729	neg	4.0019	4.2493	3.9716	3.8907	4.2453	3.8996	4.4376	4.1786	4.8639	4.5787	4.5308	4.5029
neg_11438	metab_23938	6-methoxy-3-(4-methoxyphenyl)-3,4-dihydro-2H-1-benzopyran-7-ol	C17H18O4	HMDB0132858	3.44492	331.12	1.31551	0.965428	0.03764	0.2125	neg	5.6529	5.4994	5.49	5.2024	5.49	5.2964	5.3523	5.1573	5.3579	5.237	5.2374	5.157
neg_11448	metab_23948	Indole-3-carboxilic acid-O-sulphate	C9H7NO5S	HMDB0060002	3.4369	239.998	2.34897	1.17298	0.008779	0.1108	neg	3.4084	3.9259	3.6115	3.4227	3.8911	3.4568	3.8663	3.7805	4.4869	4.8067	4.261	4.2668
neg_11454	metab_23954	Resorcinol	C6H6O2	-	3.42892	109.029	1.38735	1.05822	0.01795	0.1512	neg	4.6982	4.5612	4.3431	4.4164	4.6367	4.4494	4.9722	4.4589	4.9125	4.7951	4.7648	4.7757
neg_11498	metab_23998	(2E)-1-(4-hydroxy-3-methoxyphenyl)-3-phenylprop-2-en-1-one	C16H14O3	HMDB0135413	3.34933	299.093	1.43243	0.966633	0.01342	0.131	neg	6.1867	5.9909	6.0118	5.883	6.1835	5.8874	5.8971	5.7409	5.7827	5.8876	5.8787	5.7534
neg_11501	metab_24001	(Z)-6-(2-Methoxyvinyl)-7-methyl-2H-1-benzopyran-2-one	C13H12O3	HMDB0032656	3.34933	215.071	1.3072	0.971816	0.03144	0.1974	neg	6.6084	6.3454	6.389	6.284	6.6115	6.2964	6.3396	6.1596	6.1848	6.2753	6.3078	6.1771
neg_11502	metab_24002	1,2,3,4,5,6-Hexahydro-5-(1-hydroxyethylidene)-7H-cyclopenta[b]pyridin-7-one	C10H13NO2	HMDB0039655	3.34933	214.064	1.3783	0.960243	0.01315	0.1301	neg	4.933	4.7677	4.6867	4.6829	4.9354	4.67	4.6744	4.5067	4.5018	4.6911	4.6189	4.5397
neg_11503	metab_24003	(R)-Shinanolone	C11H12O3	HMDB0030580	3.34933	173.06	1.36829	0.958881	0.02545	0.1799	neg	4.9082	4.6449	4.6856	4.59	4.9044	4.5722	4.6172	4.4483	4.4743	4.5628	4.5892	4.4547
neg_11507	metab_24007	5-Chloro-6-methoxy-2(3H)-benzoxazolone	C8H6ClNO3	HMDB0032846	3.34143	443.009	1.53824	0.952097	0.02759	0.1861	neg	5.3944	5.1616	5.1328	5.026	5.4724	5.0027	5.0958	4.7505	4.9252	5.0116	5.0367	4.8732
neg_11558	metab_24058	Isovestitol	C16H16O4	HMDB0030526;LMPK12080028	3.29412	317.104	1.25316	0.96776	0.0255	0.1799	neg	5.4088	5.5034	5.4644	5.3593	5.451	5.3804	5.2509	5.1188	5.1204	5.473	5.3494	5.2054
neg_11663	metab_24163	Moracin F	C16H14O5	HMDB0033309	3.11018	331.084	1.18687	0.965772	0.02174	0.1659	neg	4.3816	4.4165	4.3386	4.2524	4.3462	4.2072	4.2799	4.0122	4.2827	4.1694	4.2073	4.1022
neg_11689	metab_24189	6-(2-Carboxyethyl)-7-hydroxy-2,2-dimethyl-4-chromanone glucoside	C20H26O10	HMDB0034032	3.0463	407.136	1.16497	0.959138	0.04053	0.2204	neg	4.0856	4.193	3.8171	4.0065	4.1849	3.9426	3.8576	3.9078	3.9947	3.7935	3.8425	3.8443
neg_11800	metab_24300	Indoxylsulfuric acid	C8H7NO4S	-	2.86303	212.002	2.56207	1.31925	0.03432	0.2041	neg	2.7528	1.9359	3.3287	1.9385	2.8027	3.0077	3.1254	3.8676	2.4451	4.1975	3.5967	3.5697
neg_11899	metab_24399	5,7-Dihydroxy-3-(3-hydroxy-4-methoxybenzyl)-4-chromanone	C17H16O6	HMDB0037477	2.66278	361.094	1.02471	0.975046	0.03216	0.1992	neg	5.3869	5.6535	5.5548	5.402	5.4767	5.4659	5.2569	5.3345	5.3383	5.518	5.3715	5.3011
neg_11951	metab_24451	(6E,8R,10Z)-8-hydroxy-3-oxohexadecadienoic acid	C16H26O4	HMDB0062365	2.57495	303.157	2.19185	1.22644	0.03906	0.2164	neg	2.7845	2.9302	2.6744	2.7767	2.9832	2.5965	3.3695	2.775	3.2467	2.9567	4.0885	4.1002
neg_11971	metab_24471	6-(2-Hydroxyethoxy)-6-oxohexanoic acid	C8H14O5	HMDB0061681	2.55097	189.077	1.79022	1.07893	0.0008122	0.04823	neg	3.9148	3.9107	3.9003	4.1037	4.0949	3.9434	4.4481	4.1927	4.462	4.2143	4.2224	4.2144
neg_12233	metab_24733	Cyclocalopin F	C15H18O6	HMDB0039825	2.22635	275.094	1.79674	0.918703	0.04024	0.2192	neg	4.8868	4.3477	4.2672	4.3608	4.8907	4.256	4.4697	4.0454	4.1176	3.9992	4.3175	3.8662
neg_12442	metab_24942	PISCIDIC ACID	C11H12O7	-	1.96055	255.052	2.43083	1.16948	0.009197	0.113	neg	3.6606	3.8981	3.6921	3.7316	3.861	3.5667	4.0087	4.3702	4.0261	5.0869	4.3937	4.3234
neg_12784	metab_25284	L-Agaritine	C12H17N3O4	HMDB0033758	1.5003	302.089	1.78394	1.11661	0.01833	0.152	neg	3.6169	3.609	3.9828	3.2826	3.8715	3.4519	4.4672	4.275	3.8705	3.7606	4.0168	3.9723
neg_12885	metab_25385	20-Hydroxy-leukotriene E4	C23H37NO6S	LMFA03020025;LMFA03020062;HMDB0012639	1.27202	492.185	3.65462	0.777866	0.000288	0.03535	neg	5.1622	5.1375	4.927	5.0911	5.166	4.8233	4.389	3.352	3.6743	4.1183	4.039	3.9994
neg_12920	metab_25420	4-Hydroxystachydrine	C7H13NO3	HMDB0029230	1.20918	204.088	2.35499	1.15523	0.005013	0.09058	neg	3.6755	3.8917	3.3828	3.5859	4.0769	3.6902	3.78	4.5113	4.68	4.2136	4.2933	4.2886
neg_13370	metab_25870	Tetrahydro-2,5-furan-diacetic acid	C8H12O5	HMDB0059767	0.796283	233.067	2.14746	0.923735	0.005153	0.09101	neg	6.7366	6.423	6.4522	6.1735	6.3473	6.4163	5.5066	6.0736	5.6909	6.0653	6.1373	6.136
neg_13380	metab_25880	Herierin IV	C8H10O4	HMDB0038761	0.796283	215.056	1.9099	0.933418	0.002207	0.06732	neg	5.7775	5.507	5.5171	5.273	5.4141	5.4934	4.8943	5.2148	5.0212	5.1745	5.2555	5.2263
neg_13397	metab_25897	Ascorbic Acid	C6H8O6	HMDB0000044	0.796283	157.014	1.48855	1.06657	0.028	0.1868	neg	4.9865	4.9826	4.5671	4.5657	5.0532	4.6878	5.1537	4.9583	4.9932	5.5219	5.0577	5.0769
neg_13556	metab_26056	Norophthalmic acid	C10H17N3O6	HMDB0005766	0.758283	256.094	1.2426	1.04412	0.04817	0.2393	neg	4.4886	4.9304	4.8074	4.8767	4.7072	4.7516	4.947	4.6932	4.9929	5.2161	4.9726	4.9989
neg_13868	metab_26368	D-1,5-Anhydrofructose	C6H10O5	HMDB0041561	0.643267	207.051	1.29215	1.03812	0.006547	0.09953	neg	4.8942	5.046	4.8124	4.8977	5.0609	4.8813	5.0863	5.1409	5.2815	5.1325	5.0351	5.0428

## Sheet: C65vsC80
ID	Metab ID	Metabolite	Formula	Library ID	Retention time	M/Z	VIP_pred_OPLS-DA	FC(C80/C65)	P_value	FDR	mode	C65-1	C65-2	C65-3	C65-4	C65-5	C65-6	C80-1	C80-2	C80-3	C80-4	C80-5	C80-6												subclass	formula	KEGG Compound Second Category	HMDB Superclass	KEGG Compound ID
pos_61	metab_60	4-Hydroxyproline galactoside	C11H19NO8	HMDB0029354	0.794517	276.108	1.28101	1.06262	6.705e-05	0.0008406	pos	6.4454	6.6239	6.3949	6.357	6.6022	6.5773	6.9375	6.7405	6.9131	7.0398	6.9038	6.9058												Fatty acyl glycosides	C11H19NO8	-	Lipids and lipid-like molecules	-
pos_119	metab_118	9S,11R,15S-trihydroxy-2,3-dinor-13E-prostaenoic acid-cyclo[8S,12R]	C18H32O5	LMFA03010154	6.13733	293.211	1.02902	1.04146	0.002856	0.008246	pos	7.034	7.0841	6.7251	7.0729	7.0934	7.0999	7.3323	7.18	7.3968	7.4176	7.2585	7.2712												-	C18H32O5	-	-	C14795
pos_124	metab_123	Traumatic Acid	C12H20O4	LMFA01170002;HMDB0000933	5.86723	251.126	1.50504	1.08983	1.125e-06	0.0003704	pos	5.9281	5.9109	5.7912	5.824	6.0072	6.0068	6.5286	6.3972	6.5754	6.3774	6.3861	6.3879												Fatty acids and conjugates	C12H20O4	-	Lipids and lipid-like molecules	C16308
pos_198	metab_197	Pantothenic Acid	C9H17NO5	HMDB0000210	1.84915	220.118	1.15683	1.06065	0.003476	0.009549	pos	6.0731	6.5124	6.0727	6.0799	6.3838	6.3718	6.8243	6.5832	6.6905	6.5591	6.5476	6.5631												Alcohols and polyols	C9H17NO5	Vitamins	Organic oxygen compounds	C00864
pos_203	metab_202	Glycylproline	C7H12N2O3	HMDB0000721	0.683517	173.092	1.22869	1.06248	4.005e-05	0.0006831	pos	5.6837	5.8975	5.7169	5.7228	5.8828	5.861	6.202	6.0752	6.1777	6.236	6.1182	6.1271												Amino acids, peptides, and analogues	C7H12N2O3	-	Organic acids and derivatives	-
pos_224	metab_223	Aspartyl-Proline	C9H14N2O5	HMDB0028761	0.71275	231.098	1.42593	1.08911	0.0001624	0.001241	pos	5.4608	5.7417	5.473	5.4478	5.7386	5.7368	6.2094	6.0204	6.1587	6.0755	6.053	6.0743												Amino acids, peptides, and analogues	C9H14N2O5	-	Organic acids and derivatives	-
pos_264	metab_263	Glutathione episulfonium ion	C12H20N3O6S+	HMDB0060479	3.5136	317.102	1.55824	1.16059	0.002881	0.008306	pos	4.353	4.4267	3.6057	4.2856	4.5518	4.4462	5.3724	4.7213	5.0023	4.9174	4.9932	4.784												Amino acids, peptides, and analogues	C12H20N3O6S+	-	Organic acids and derivatives	C14874
pos_281	metab_280	()7-epi Jasmonic Acid	C12H18O3	-	3.75692	211.133	1.38211	1.0838	0.0003247	0.001852	pos	5.9034	6.041	5.6658	5.7005	6.0324	6.0292	6.4303	6.1446	6.5413	6.4901	6.3647	6.3604												Terpene lactones	C15H22O4	-	Lipids and lipid-like molecules	-
pos_284	metab_283	Arlatin	C15H22O4	HMDB0035740	4.44882	267.159	1.46155	1.11654	0.0003096	0.001801	pos	4.8509	4.9116	4.5232	4.6462	4.8887	4.9092	5.3452	5.0703	5.6687	5.3404	5.3125	5.3378												Lineolic acids and derivatives	C12H20O3	-	Lipids and lipid-like molecules	C08482
pos_318	metab_317	Cucurbic acid	C12H20O3	HMDB0029388	6.0101	195.138	1.15476	1.05715	6.158e-06	0.0004533	pos	5.5214	5.4979	5.3992	5.4519	5.5576	5.5366	5.8383	5.7355	5.9046	5.8482	5.7555	5.7651												-	C37H70NO8P	-	-	-
pos_356	metab_355	AMC Arachidonoyl Amide	C30H39NO3	-	7.03067	484.281	1.88549	1.26188	0.01133	0.02362	pos	2.9812	5.0353	4.0466	3.8948	4.6435	4.2829	5.7097	5.1531	5.0955	5.0428	5.2011	5.1947												Glycerophosphoethanolamines	C37H72NO7P	-	Lipids and lipid-like molecules	-
pos_363	metab_362	PE(16:1(5Z)/16:1(5Z))	C37H70NO8P	LMGP02010356	7.2419	710.475	1.46517	0.907407	0.005036	0.01261	pos	6.888	7.396	6.5539	6.8747	7.3879	7.3422	6.1338	6.326	6.2072	6.8571	6.5299	6.4625												Glycerophosphoethanolamines	C35H70NO7P	-	Lipids and lipid-like molecules	-
pos_375	metab_374	PE(14:1(9Z)/P-18:0)	C37H72NO7P	HMDB0008884	7.70228	696.495	1.8048	0.872617	0.0003422	0.00192	pos	6.6396	6.8613	6.5155	6.649	7.0116	6.9267	5.4144	5.8456	5.9288	6.3807	5.9834	5.8799												Glycerophosphocholines	C34H68NO7P	-	Lipids and lipid-like molecules	-
pos_401	metab_400	PE(14:0/P-16:0)	C35H70NO7P	HMDB0008850	7.6117	670.48	1.04265	0.930775	0.04424	0.07218	pos	5.9128	5.907	6.8418	6.5027	6.2183	6.1463	5.4364	5.8978	6.2844	5.8278	5.7889	5.6964												Glycerophosphoethanolamines	C37H70NO7P	-	Lipids and lipid-like molecules	-
pos_406	metab_405	1-Palmitoyl-2-linoleoyl PE	C39H74NO8P	-	7.49102	738.506	1.17355	0.934569	0.01618	0.03147	pos	6.9065	6.9611	7.3626	7.7023	7.2416	7.1998	6.2673	6.8873	7.1122	6.7609	6.798	6.7088												Glycerophosphoethanolamines	C35H68NO7P	-	Lipids and lipid-like molecules	-
pos_407	metab_406	LysoPC(26:1(5Z))	C34H68NO7P	HMDB0029220	7.44575	656.464	1.10407	0.926108	0.03364	0.05742	pos	6.1284	5.9334	6.8371	6.4046	6.2641	6.1874	5.1963	5.9888	6.1973	5.9572	5.8802	5.7507												-	C17H30O2	-	-	-
pos_410	metab_409	PE(P-18:1(9Z)/14:1(9Z))	C37H70NO7P	HMDB0011435	7.40042	694.479	1.37386	0.920712	0.004654	0.01188	pos	6.9822	7.5341	6.8945	7.0538	7.5476	7.5023	6.3806	6.6459	6.5625	7.0498	6.7623	6.6612												-	C16H24O2	-	-	-
pos_411	metab_410	PE(P-16:0/14:1(9Z))	C35H68NO7P	LMGP02030010;HMDB0011336	7.37025	668.464	1.21412	0.921077	0.02172	0.03995	pos	6.3225	6.9238	6.4689	6.3538	6.8354	6.7777	5.3867	6.3677	6.1373	6.4583	6.1453	6.057												Fatty alcohol esters	C11H18O2	-	Lipids and lipid-like molecules	-
pos_485	metab_484	PGF1alpha Alcohol	C20H38O4	-	6.20472	365.267	1.4861	1.09391	5.051e-05	0.0007462	pos	5.8071	5.8204	5.6495	5.6386	5.8882	5.8906	6.5912	6.1682	6.4007	6.2731	6.2591	6.2554												Not Available	C10H14N2O6	-	Nucleosides, nucleotides, and analogues	-
pos_498	metab_497	(E)-3,7-Dimethyl-2,6-octadienyl heptanoate	C17H30O2	LMFA07010619	6.1523	249.221	1.29655	1.08163	0.000505	0.002444	pos	5.2948	5.3958	5.0919	5.3779	5.4476	5.4371	5.7677	5.5014	5.8593	5.9927	5.7747	5.7684												Amino acids, peptides, and analogues	C10H16N2O3	-	Organic acids and derivatives	-
pos_516	metab_515	7,10-Hexadecadiynoic acid	C16H24O2	LMFA01030492	6.05507	249.185	1.19986	1.06118	0.0001756	0.001293	pos	5.9208	5.8868	5.6292	5.8271	5.9461	5.9034	6.2533	6.13	6.3259	6.212	6.1638	6.176												Carbonyl compounds	C10H9NO4	-	Organic oxygen compounds	C01252
pos_528	metab_527	(3E,6Z)-Nonadien-1-yl acetate	C11H18O2	HMDB0038068	5.86723	147.117	1.24982	1.06589	8.612e-07	0.0003613	pos	5.5303	5.5135	5.4323	5.4652	5.5609	5.5546	5.9274	5.8114	5.9639	5.8736	5.8251	5.8293												Amino acids, peptides, and analogues	C10H17NO4	-	Organic acids and derivatives	-
pos_722	metab_721	Ribothymidine	C10H14N2O6	HMDB0000884	1.33803	281.075	1.90025	1.27189	0.006962	0.01611	pos	3.715	4.2674	2.6857	3.7445	4.1616	4.1748	5.0395	4.6538	4.9018	4.6887	4.8059	4.8462												Amino acids, peptides, and analogues	C14H18N2O4	-	Organic acids and derivatives	-
pos_780	metab_779	L-prolyl-L-proline	C10H16N2O3	HMDB0011180	1.72502	195.113	1.03209	1.06221	0.002054	0.006488	pos	5.0102	5.1058	4.7859	4.8456	4.9678	4.9904	5.3813	5.0319	5.4218	5.2027	5.2523	5.2643												Amino acids, peptides, and analogues	C8H14N2O4	-	Organic acids and derivatives	-
pos_806	metab_805	4-(2-Aminophenyl)-2,4-dioxobutanoic acid	C10H9NO4	HMDB0000978	1.9175	190.05	1.36548	1.11872	0.001105	0.004147	pos	4.4102	4.377	4.0064	4.1975	4.4787	4.4571	4.9637	4.4698	5.085	4.8198	4.8519	4.8139												-	C9H19NO2	-	-	-
pos_870	metab_869	7-hydroxyoct-7-enoylglycine	C10H17NO4	HMDB0094779	2.24875	216.123	1.11248	1.05763	0.0007033	0.003034	pos	5.8166	5.843	5.5466	5.5832	5.7891	5.7786	6.1303	5.8687	6.1482	6.1292	6.0173	6.0452												Indolyl carboxylic acids and derivatives	C10H9NO3	-	Organoheterocyclic compounds	C05635
pos_913	metab_912	L-phenylalanyl-L-hydroxyproline	C14H18N2O4	HMDB0011176	2.507	311.161	1.07951	1.05681	0.001078	0.004072	pos	5.7469	5.8209	5.5088	5.559	5.7359	5.7438	6.0988	5.82	6.185	5.9698	5.9916	5.99												Medium-chain hydroxy acids and derivatives	C8H12O3	-	Organic acids and derivatives	-
pos_921	metab_920	Hydroxyprolyl-Alanine	C8H14N2O4	HMDB0028856	2.56137	167.082	1.24899	1.09044	0.0003573	0.001967	pos	4.534	4.57	4.3551	4.3485	4.5738	4.5506	5.0238	4.6432	5.0537	4.8984	4.8614	4.8873												Not Available	C10H15NO3	-	Organoheterocyclic compounds	C08511
pos_935	metab_934	3R-aminononanoic acid	C9H19NO2	LMFA01100019	2.65393	174.149	1.63177	1.11698	1.039e-05	0.0004933	pos	5.4964	5.5769	5.351	5.2381	5.5869	5.5767	6.1654	6.0623	6.3343	6.038	6.0252	6.0391												Homoisoflavans	C18H18O7	-	Phenylpropanoids and polyketides	-
pos_982	metab_981	5-Hydroxyindoleacetic acid	C10H9NO3	HMDB0000763	2.97855	192.066	1.08892	1.08041	0.006565	0.01541	pos	4.5326	4.7267	4.2269	4.4857	4.6462	4.6173	5.1973	4.6912	5.0754	4.7905	4.8757	4.7933												-	C12H16O2	-	-	-
pos_986	metab_985	Cis-2-Carboxycyclohexyl-acetic acid	C9H14O4	-	3.0091	169.086	1.18693	1.07486	5.829e-06	0.0004487	pos	4.3674	4.2859	4.2764	4.2902	4.3283	4.341	4.6455	4.6356	4.7385	4.6716	4.5649	4.5731												Not Available	C10H12O2	-	Benzenoids	-
pos_990	metab_989	8-Hydroxy-5,6-octadienoic acid	C8H12O3	LMFA01031076;HMDB0031101	3.02548	313.163	1.47772	1.11993	2.661e-05	0.000599	pos	4.4416	4.5087	4.2222	4.214	4.4908	4.4389	4.9569	4.8008	5.0407	4.9358	4.8544	4.8824												1-benzopyrans	C18H14O5	-	Organoheterocyclic compounds	-
pos_1012	metab_1011	Tenuazonic acid	C10H15NO3	HMDB0036074	3.20917	180.102	1.25621	1.08053	0.000864	0.003486	pos	5.1732	5.2002	4.9719	5.0468	5.1564	5.1494	5.5443	5.2714	5.4356	5.7793	5.5639	5.5737												Not Available	C16H20O6	-	Organoheterocyclic compounds	-
pos_1051	metab_1050	Muscomin	C18H18O7	HMDB0037250	3.5136	369.095	1.51446	1.16013	0.002522	0.007554	pos	3.8591	4.2067	3.6248	3.895	4.4293	4.3018	5.1382	4.4683	4.7253	4.6105	4.7569	4.5156												Lineolic acids and derivatives	C18H28O4	-	Lipids and lipid-like molecules	-
pos_1052	metab_1051	2E,4E,8Z,10E-dodecatetraenoic acid	C12H16O2	LMFA01030240	3.52118	193.123	1.27369	1.0833	0.001432	0.00498	pos	5.4875	5.5106	5.2221	5.1761	5.467	5.4743	6.0582	5.4736	5.8949	5.9269	5.8361	5.8425												-	C12H16O2	-	-	-
pos_1078	metab_1077	3-Phenylpropyl formate	C10H12O2	HMDB0034471	3.77203	165.091	1.3184	1.08824	0.0002682	0.001638	pos	5.1562	5.1933	4.9727	4.9239	5.2094	5.2086	5.7055	5.2801	5.6832	5.5925	5.5556	5.5549												-	C11H16O	-	-	-
pos_1164	metab_1163	6,11-Dihydroxy-2,2-dimethylpyrano[3,2-c]xanthen-7(2H)-one	C18H14O5	HMDB0040357	4.69127	311.092	1.20814	1.06813	0.0003135	0.001814	pos	5.4505	5.3757	5.1358	5.2398	5.4148	5.4429	5.7398	5.6069	5.7468	5.8071	5.6649	5.6773												Isoindolines	C8H9NO3	-	Organoheterocyclic compounds	-
pos_1167	metab_1166	8-Acetylegelolide	C16H20O6	HMDB0037772	4.72155	341.158	1.51443	1.11872	0.0003901	0.002073	pos	4.8126	4.7009	4.4427	4.5995	4.9138	4.9359	5.3005	5.2097	5.4062	5.3578	5.2448	5.2577												Eicosanoids	C20H34O6	-	Lipids and lipid-like molecules	C05961
pos_1176	metab_1175	Corchorifatty acid A	C18H28O4	HMDB0032664	4.81267	291.196	1.42818	1.11446	1.165e-05	0.0005139	pos	4.2741	4.2478	4.0846	4.1599	4.3392	4.3703	4.7645	4.6534	4.9124	4.7433	4.6422	4.6744												-	C18H28O2	-	-	-
pos_1193	metab_1192	C12:4n-2,4,8,10	C12H16O2	LMFA01030240	4.9485	193.123	1.2598	1.07689	5.799e-05	0.0007886	pos	5.0297	5.0303	4.8552	4.8637	5.1035	5.0802	5.4299	5.2821	5.4646	5.4175	5.3395	5.3352												Fatty acids and conjugates	C17H28O3	-	Lipids and lipid-like molecules	C20388
pos_1223	metab_1222	2,4,6-undecatrienal	C11H16O	LMFA06000069	5.283	147.117	1.40732	1.10194	0.0001136	0.001042	pos	4.7298	4.624	4.5407	4.723	4.7256	4.731	5.0727	5.0367	5.4074	5.2487	5.0884	5.0813												Glycerophosphoethanolamines	C38H74NO8P	-	Lipids and lipid-like molecules	-
pos_1230	metab_1229	3alpha,4,5,7alpha-Tetrahydro-5-hydroxy-1H-isoindole-1,3(2H)-dione	C8H9NO3	HMDB0034887	5.3741	335.124	1.62122	1.12594	5.075e-06	0.0004479	pos	4.9351	4.9586	4.7309	4.747	5.003	5.0184	5.5869	5.3847	5.5918	5.5847	5.4694	5.4776												Glycerophosphoethanolamines	C39H66NO8P	-	Lipids and lipid-like molecules	-
pos_1340	metab_1339	6-Keto-prostaglandin F1a	C20H34O6	HMDB0002886	6.12987	353.23	1.32049	1.06415	3.862e-05	0.0006717	pos	6.5772	6.5762	6.3527	6.5538	6.6645	6.6557	7.0308	6.8905	7.1193	7.0144	6.9169	6.9343												Carbonyl compounds	C9H16O2	-	Organic oxygen compounds	-
pos_1345	metab_1344	8,11-Octadecadiynoic acid	C18H28O2	LMFA01030537	6.14482	277.216	1.1864	1.05412	0.0001751	0.001292	pos	6.508	6.5387	6.301	6.5012	6.5929	6.5826	6.9136	6.6963	6.9466	6.9679	6.8024	6.8111												-	C16H26O2	-	-	-
pos_1351	metab_1350	12S-HHT	C17H28O3	HMDB0012535	6.15977	313.237	1.44949	1.08763	0.0001156	0.001049	pos	5.9028	6.0143	5.7196	5.9407	6.0844	6.0821	6.5517	6.2083	6.5748	6.6555	6.4362	6.4503												Fatty acids and conjugates	C17H28O3	-	Lipids and lipid-like molecules	-
pos_1364	metab_1363	F4-Neuroprostane (4-series)	C22H34O5	-	6.19722	379.246	1.33156	1.07629	3.709e-05	0.0006625	pos	5.6573	5.6129	5.4381	5.6032	5.7174	5.7106	6.1396	5.8775	6.1104	6.1707	6.0089	6.006												-	C18H26O2	-	-	-
pos_1419	metab_1418	Oleoyl Ethanolamide	C20H39NO2	-	6.57813	326.306	1.09608	1.06446	0.0029	0.008344	pos	5.1889	5.7067	5.3897	5.4582	5.567	5.5432	6.0089	5.7456	5.7696	5.706	5.9143	5.8324												Not Available	C14H20O	-	Phenylpropanoids and polyketides	-
pos_1640	metab_1639	PE-NMe(14:1(9Z)/18:0)	C38H74NO8P	HMDB0112952	7.46837	704.524	1.76804	0.786286	0.0415	0.06842	pos	3.816	5.8894	6.2817	5.3879	5.8248	5.7885	2.9378	3.5748	4.551	5.1027	4.9619	4.8086												Piperidinecarboxylic acids and derivatives	C11H20N2O2	-	Organoheterocyclic compounds	C16836
pos_1669	metab_1668	PE(14:1(9Z)/20:5(5Z,8Z,11Z,14Z,17Z))	C39H66NO8P	LMGP02010445;HMDB0008873	7.15897	708.459	1.13368	0.919167	0.03158	0.05444	pos	5.3596	5.9278	5.0353	5.3289	5.8727	5.8781	5.1274	4.9781	4.8831	5.3246	5.2206	5.17												Indanones	C13H16O	-	Benzenoids	-
pos_1956	metab_1955	Trans,trans-Farnesol	C15H26O	-	6.15977	223.206	1.20342	1.06804	1.944e-05	0.0005576	pos	5.2306	5.1768	5.074	5.1013	5.2844	5.26	5.6082	5.5374	5.6392	5.4435	5.5084	5.5069												-	C13H22O	-	-	-
pos_1962	metab_1961	2-Hydroxy-2,6,6-trimethylcyclohexanone	C9H16O2	HMDB0037023	6.1523	330.264	1.3738	1.08785	0.0004441	0.002242	pos	5.4653	5.5878	5.2886	5.5117	5.6412	5.6327	6.002	5.6963	6.1067	6.2398	5.9979	5.9949												Fatty alcohols	C9H18O2	-	Lipids and lipid-like molecules	-
pos_1966	metab_1965	(S)-(-)-Perillyl alcohol	C10H16O	-	6.1523	305.248	1.24134	1.06382	6.983e-06	0.0004638	pos	5.7681	5.7346	5.628	5.6864	5.7985	5.7964	6.1644	5.9865	6.2018	6.1267	6.0603	6.0644												Alcohols and polyols	C11H16O2	-	Organic oxygen compounds	-
pos_1968	metab_1967	6,9,12-hexadecatrienoic acid	C16H26O2	LMFA01030136;LMFA01031092	6.1523	251.201	1.11176	1.0518	5.892e-05	0.0007937	pos	5.836	5.8079	5.6465	5.8286	5.8771	5.8714	6.1662	6.0282	6.1888	6.1473	6.0675	6.0721												Amino acids, peptides, and analogues	C5H11NO2	Amino acids	Organic acids and derivatives	C00183
pos_2003	metab_2002	3-Methyl-5-propyl-2-furannonanoic acid	C17H28O3	HMDB0094642	6.10742	263.201	1.10314	1.05356	0.0006565	0.0029	pos	5.9292	5.8994	5.6649	5.9961	5.955	5.9524	6.2535	6.0563	6.3083	6.3379	6.1635	6.1791												Not Available	C8H6O	-	Organoheterocyclic compounds	C14512
pos_2012	metab_2011	13E-octadecene-9,11-diynoic acid	C18H26O2	LMFA01030556	6.09993	275.201	1.25885	1.05676	3.925e-05	0.000677	pos	6.7766	6.7581	6.5639	6.7135	6.843	6.8313	7.1559	7.0221	7.2558	7.1859	7.0781	7.0908												Not Available	C10H13N5O3	-	Nucleosides, nucleotides, and analogues	C05198
pos_2085	metab_2084	Confertifoline	C15H22O2	-	6.0026	235.169	1.33334	1.07305	7.2e-06	0.0004687	pos	5.7881	5.7768	5.6346	5.7158	5.834	5.8263	6.2083	6.0593	6.3256	6.2272	6.1359	6.1451												Pyrrolidones	C4H7NO	-	Organoheterocyclic compounds	C11118
pos_2093	metab_2092	2-Benzylidene-1-heptanol	C14H20O	HMDB0036170	5.9951	205.159	1.36984	1.08768	6.992e-06	0.0004638	pos	5.0956	5.0652	4.8979	5.021	5.1713	5.1328	5.5552	5.4023	5.6218	5.5328	5.4578	5.4811												Purines and purine derivatives	C10H15N5O	-	Organoheterocyclic compounds	C02029
pos_2104	metab_2103	1,4'-Bipiperidine-1'-carboxylic acid	C11H20N2O2	HMDB0060336	5.91988	213.16	1.3564	1.09926	0.0002818	0.001694	pos	4.673	4.6583	4.4562	4.5684	4.6545	4.6757	5.3167	4.9292	5.2024	5.0578	4.9941	4.929												Benzoic acids and derivatives	C9H10O5	-	Benzenoids	C10833
pos_2108	metab_2107	6-hydroxy buspirone	C21H31N5O3	-	5.90483	424.231	1.4105	1.15903	0.02496	0.04474	pos	3.7112	3.7616	3.7157	4.7007	4.4416	4.4165	4.4415	4.6255	4.4286	5.5573	4.7902	4.8403												Pyrimidines and pyrimidine derivatives	C5H6N2O2	Bases	Organoheterocyclic compounds	C00178
pos_2135	metab_2134	1-H-Inden-1-one,2,3-dihydro-3,3,5,6-tetramethyl	C13H16O	HMDB0059683	5.70062	189.128	1.23584	1.07937	5.539e-05	0.0007736	pos	4.682	4.683	4.52	4.5271	4.7479	4.736	5.0454	4.9211	5.0857	5.0575	4.994	5.0054												Carbohydrates and carbohydrate conjugates	C17H18O9	-	Organic oxygen compounds	-
pos_2166	metab_2165	6,10-Dimethyl-5(E),9-undecadien-2-one	C13H22O	LMFA11000696	4.80508	177.164	1.79709	1.19125	0.0001006	0.0009915	pos	4.2757	4.1328	4.0968	4.0191	4.3485	4.3528	5.271	5.1216	5.1931	4.6083	4.931	4.9255												Fatty acids and conjugates	C11H20O4	-	Lipids and lipid-like molecules	-
pos_2169	metab_2168	3-(Hydroxymethyl)-2-octanone	C9H18O2	LMFA05000624;HMDB0037164	4.68373	197.096	1.04211	1.05786	5.322e-05	0.0007576	pos	4.5643	4.4707	4.3997	4.478	4.5723	4.5804	4.773	4.7073	4.7914	4.8685	4.7461	4.7458												Amino acids, peptides, and analogues	C9H17N3O4	-	Organic acids and derivatives	-
pos_2198	metab_2197	Jasmolone	C11H16O2	HMDB0030039	3.75692	163.112	1.41745	1.09447	0.0002354	0.00151	pos	5.4468	5.5381	5.1454	5.2418	5.534	5.5463	5.9714	5.7281	6.1124	5.9651	5.8711	5.871												Amino acids, peptides, and analogues	C12H23NO7	-	Organic acids and derivatives	-
pos_2262	metab_2261	L-Valine	C5H11NO2	HMDB0000883	0.69805	118.087	1.13277	1.04971	8.747e-05	0.0009336	pos	6.3996	6.5491	6.3436	6.3753	6.5433	6.5321	6.913	6.6839	6.7981	6.7778	6.7419	6.7509												Steroidal glycosides	C33H52O9	-	Lipids and lipid-like molecules	C08885
pos_2324	metab_2323	(5S,6S)-6-Amino-5-hydroxycyclohexane-1,3-diene-1-carboxyate	C7H9NO3	-	0.75	156.066	1.17877	1.0639	6.302e-05	0.0008141	pos	5.4916	5.4828	5.3095	5.4113	5.4892	5.491	5.8283	5.6379	5.9429	5.7563	5.7922	5.805												Fatty acyl glycosides	C11H17NO7	-	Lipids and lipid-like molecules	C08340
pos_2426	metab_2425	Benzofuran	C8H6O	HMDB0032929	0.990167	136.075	1.16035	1.05461	0.0001397	0.001146	pos	6.1519	6.3351	6.0876	6.1556	6.3208	6.3074	6.7045	6.4544	6.5961	6.5707	6.5265	6.5444												Amino acids, peptides, and analogues	C11H13NO4	-	Organic acids and derivatives	-
pos_2433	metab_2432	5'-Deoxyadenosine	C10H13N5O3	HMDB0001983	1.0353	252.109	1.41533	1.07943	0.0004893	0.002397	pos	6.5473	6.3786	6.2302	6.4627	6.7194	6.7183	7.1679	6.9917	7.2453	6.9047	6.9139	6.9296												Benzoyl derivatives	C7H6O	-	Benzenoids	C00261
pos_2640	metab_2639	2-Pyrrolidinone	C4H7NO	HMDB0002039	0.617	86.0606	1.05703	1.05991	0.0002904	0.001728	pos	4.5483	4.5748	4.5601	4.5453	4.6369	4.6772	4.8677	4.8037	5.0378	4.8903	4.7722	4.8156												Not Available	C19H22N2O3	-	Alkaloids and derivatives	-
pos_2680	metab_2679	Dihydrozeatin	C10H15N5O	HMDB0012215	0.646483	222.134	1.00899	1.0548	0.001243	0.004505	pos	5.1513	5.1212	4.8523	4.9647	5.1303	5.1127	5.3797	5.2901	5.4756	5.2706	5.3031	5.2707												Not Available	C12H17N5O5	-	Nucleosides, nucleotides, and analogues	-
pos_2688	metab_2687	N-Methyl-L-glutamate	C6H11NO4	-	0.66145	162.076	1.15578	1.0678	0.0001126	0.001037	pos	4.8258	5.0106	4.8737	4.7398	4.9303	4.913	5.3422	5.1324	5.239	5.3007	5.1293	5.136												Carbohydrates and carbohydrate conjugates	C11H19NO6	-	Organic oxygen compounds	-
pos_2728	metab_2727	3-Buten-1-amine	C4H9N	-	0.69805	72.0814	1.12463	1.04975	8.925e-05	0.0009394	pos	6.3128	6.4688	6.2708	6.2791	6.46	6.4414	6.8172	6.5939	6.7069	6.679	6.6607	6.677												Sesquiterpenoids	C17H28O4	-	Lipids and lipid-like molecules	-
pos_2874	metab_2873	Syringic acid	C9H10O5	HMDB0002085	0.8168	199.06	1.26733	0.881783	0.0241	0.04348	pos	4.5777	4.72	4.131	4.5978	4.2922	4.3276	3.2004	4.0826	3.6873	4.1536	4.1045	4.2703												Phenylpyruvic acid derivatives	C10H10O5	-	Benzenoids	-
pos_2913	metab_2912	Thymine	C5H6N2O2	HMDB0000262	0.9375	127.05	1.87636	1.14502	8.622e-06	0.0004752	pos	5.8492	5.979	5.5933	5.7375	6.0458	6.0425	7.0013	6.5259	6.8501	6.6004	6.6866	6.7006												Amino acids, peptides, and analogues	C13H18N2O4	-	Organic acids and derivatives	-
pos_2993	metab_2992	Furocoumarinic acid glucoside	C17H18O9	HMDB0029601	1.12552	430.113	2.09837	1.29623	0.001494	0.005133	pos	3.7254	4.208	3.0348	3.7961	4.3911	4.2402	5.2948	4.8506	5.267	4.9069	4.9768	5.0264												Fatty alcohols	C14H28O3	-	Lipids and lipid-like molecules	-
pos_3023	metab_3022	N-Fructosyl isoleucine	C12H23NO7	-	1.18588	294.155	2.31205	1.40033	0.002029	0.006431	pos	3.0188	4.3262	3.373	2.7368	4.0806	4.2853	5.4432	4.5125	5.4747	5.145	4.9048	5.0774												1-benzopyrans	C21H28O4	-	Organoheterocyclic compounds	-
pos_3041	metab_3040	Undecanedioic acid	C11H20O4	LMFA01170007;HMDB0000888	1.23882	234.17	1.21913	1.08593	0.0001269	0.00109	pos	4.1898	4.3381	4.2172	4.3168	4.3622	4.3429	4.6629	4.5264	4.8756	4.6492	4.6321	4.6319												Amino acids, peptides, and analogues	C10H19N3O4	-	Organic acids and derivatives	-
pos_3083	metab_3082	Asparaginyl-Valine	C9H17N3O4	HMDB0028744	1.37618	214.119	1.09182	1.06771	0.0008143	0.003344	pos	4.7333	4.9372	4.6326	4.6314	4.8474	4.836	5.2249	4.9701	5.2349	5.0409	5.0202	5.0664												Anisoles	C7H8O	-	Benzenoids	C01403
pos_3125	metab_3124	N-(1-Deoxy-1-fructosyl)leucine	C12H23NO7	HMDB0037840	1.46792	294.155	2.04467	1.28773	0.0001627	0.001242	pos	3.5247	3.9524	3.6866	3.2051	3.8085	3.9665	5.0683	4.2417	5.1401	4.7982	4.5593	4.7112												-	C11H21BrO2	-	-	-
pos_3179	metab_3178	Agavoside A	C33H52O9	LMST01080006;HMDB0034391	1.57395	308.177	1.7149	1.47061	0.04257	0.06986	pos	3.7003	2.0319	1.9086	1.9675	2.0411	2.8483	4.5729	2.0901	2.7267	4.1199	3.7877	4.0226												Amino acids, peptides, and analogues	C11H21N5O4	-	Organic acids and derivatives	-
pos_3198	metab_3197	Sarmentosin	C11H17NO7	HMDB0030697	1.61983	298.09	1.6524	1.16345	0.001143	0.004247	pos	4.0982	4.7131	4.0043	4.1509	4.5491	4.585	5.235	4.8806	5.0071	5.2135	5.0093	5.0225												Not Available	C11H14N2O5	-	Lipids and lipid-like molecules	C16582
pos_3208	metab_3207	3-hydroxyphenylpropionylglycine	C11H13NO4	HMDB0094724	1.64225	256.118	1.26817	1.09451	0.001551	0.005274	pos	4.873	4.8001	4.3446	4.537	4.742	4.6966	5.0685	4.8714	5.1683	5.3396	5.1131	5.0789												Fatty acyl glycosides	C12H24O6	-	Lipids and lipid-like molecules	-
pos_3216	metab_3215	Benzaldehyde	C7H6O	HMDB0006115	1.65712	107.05	1.11243	1.0595	0.0004632	0.002308	pos	5.4529	5.5746	5.322	5.3625	5.5767	5.5862	5.9641	5.7061	5.6923	5.8654	5.7977	5.8072												Eicosanoids	C16H24O3	-	Lipids and lipid-like molecules	-
pos_3272	metab_3271	Alkaloid AQC2	C19H22N2O3	HMDB0038595	1.74023	344.197	2.12808	1.28532	8.446e-05	0.0009222	pos	4.1985	4.3059	3.6335	3.502	3.9764	4.1254	5.5826	4.8411	5.1829	5.1556	4.9492	4.8049												Pregnane steroids	C27H41NO6	-	Lipids and lipid-like molecules	-
pos_3301	metab_3300	N2,N2-Dimethylguanosine	C12H17N5O5	HMDB0004824	1.81763	312.131	1.001	1.06975	0.007952	0.01787	pos	4.3426	4.7716	4.4428	4.2943	4.6605	4.5836	4.6187	4.7999	4.9988	4.8185	4.8594	4.8888												Steroid lactones	C19H30O3	-	Lipids and lipid-like molecules	C07346
pos_3316	metab_3315	Epidermin	C11H19NO6	HMDB0034777	1.85673	226.108	1.01849	1.04696	0.004235	0.01107	pos	6.7241	6.7493	6.3524	6.5091	6.6453	6.6236	6.9815	6.6468	7.075	6.9493	6.9244	6.891												Olefins	C8H14	-	Hydrocarbons	-
pos_3370	metab_3369	Tanacetol B	C17H28O4	HMDB0035075	1.94138	341.171	1.04029	1.06038	0.002268	0.006989	pos	5.1191	5.1236	4.8374	4.8564	5.1082	5.0617	5.422	5.1117	5.3735	5.4468	5.2608	5.3125												Quinolones and derivatives	C16H19NO5	-	Organoheterocyclic compounds	-
pos_3433	metab_3432	7,8-Dihydrobiopterin	C9H13N5O3	-	2.03352	272.136	1.46573	1.11763	0.001003	0.00387	pos	4.494	4.7671	4.3753	4.4392	4.8384	4.8813	5.1959	5.2394	5.0678	5.306	5.0885	5.1703												Amino acids, peptides, and analogues	C9H17N3O4	-	Organic acids and derivatives	-
pos_3519	metab_3518	Vanilpyruvic acid	C10H10O5	HMDB0011714	2.18842	211.06	1.00115	1.05424	0.0001446	0.001164	pos	4.6617	4.7287	4.5249	4.5717	4.6859	4.7031	4.9101	4.8582	5.0118	4.8833	4.8674	4.8582												Amino acids, peptides, and analogues	C8H15N3O4S	-	Organic acids and derivatives	-
pos_3530	metab_3529	Gamma-Glu-Leu	C11H20N2O5	-	2.20363	261.145	1.31909	1.08899	0.00142	0.004949	pos	5.122	5.2704	5.0209	5.1426	5.492	5.5058	5.5386	5.7963	5.5663	5.9783	5.7319	5.7515												Medium-chain hydroxy acids and derivatives	C12H24O3	-	Organic acids and derivatives	C08317
pos_3553	metab_3552	Phenylalanyl-Threonine	C13H18N2O4	HMDB0029005	2.23383	249.123	1.42495	1.17157	0.009276	0.02012	pos	3.9748	3.7351	3.101	3.717	3.9357	3.778	4.2203	3.823	4.9558	4.4028	4.3498	4.3049												Amino acids, peptides, and analogues	C15H18N4O4	-	Organic acids and derivatives	-
pos_3559	metab_3558	Ethyl 3-hydroxydodecanoate	C14H28O3	HMDB0059850	2.24875	283.166	1.27712	1.10827	0.0051	0.01271	pos	4.6452	4.8755	4.2153	4.4438	4.6591	4.5915	5.225	4.6139	5.3689	5.0934	5.0296	5.0717												Amino acids, peptides, and analogues	C11H18N2O2	-	Organic acids and derivatives	-
pos_3585	metab_3584	Kainic acid	C10H15NO4	-	2.31113	214.107	1.24228	1.088	0.0008072	0.003325	pos	4.6778	4.7458	4.5708	4.5322	4.7767	4.7867	5.3177	4.8679	5.2616	4.9931	5.0583	5.0677												Amino acids, peptides, and analogues	C11H21N3O4	-	Organic acids and derivatives	-
pos_3658	metab_3657	11-nor-9-carboxy-Delta(9)-tetrahydrocannabinol	C21H28O4	HMDB0062770	2.42367	386.229	1.67419	1.1593	5.598e-05	0.0007784	pos	4.2247	4.5757	4.127	4.3288	4.571	4.4997	5.0312	4.8585	5.389	5.0881	5.0697	5.0852												Hydroxyindoles	C9H7NO2	-	Organoheterocyclic compounds	-
pos_3667	metab_3666	Asparaginyl-Isoleucine	C10H19N3O4	HMDB0028734	2.43875	228.135	1.93279	1.3172	0.0001995	0.001397	pos	3.0229	3.4381	2.8062	2.688	3.0335	3.3583	4.5302	3.654	4.0223	4.0073	3.8428	4.1135												-	C10H21NO2	-	-	-
pos_3688	metab_3687	Anisole	C7H8O	HMDB0033895	2.49182	109.065	1.241	1.08723	1.938e-05	0.0005576	pos	4.2989	4.249	4.182	4.1671	4.306	4.3161	4.7026	4.4979	4.7556	4.6018	4.5945	4.5935												Pyranocoumarins	C16H18O6	-	Phenylpropanoids and polyketides	-
pos_3708	metab_3707	11-bromo-undecanoic acid	C11H21BrO2	LMFA01090005	2.51575	265.082	1.35152	1.11639	0.001349	0.004777	pos	4.4269	4.5421	4.0277	4.1587	4.4861	4.4946	4.9989	4.5025	4.982	4.9594	4.8717	4.862												Methoxyphenols	C8H10O3	-	Benzenoids	-
pos_3729	metab_3728	Arginyl-Hydroxyproline	C11H21N5O4	HMDB0028710	2.55375	310.148	1.00001	1.07484	0.02116	0.03911	pos	4.5544	4.6108	4.7137	4.1246	4.8619	4.5569	4.9925	4.6017	5.0862	4.9248	4.9911	4.8771												Not Available	C12H12O2	-	Phenylpropanoids and polyketides	-
pos_3731	metab_3730	O-Hydroxyhippuric acid	C9H9NO4	-	2.56137	178.05	1.4451	1.16437	0.002393	0.007264	pos	3.5564	3.5946	3.3405	3.0061	3.6921	3.7261	3.9869	4.0415	4.2013	3.9082	4.1268	4.091												Arylsulfates	C10H12O7S	-	Organic acids and derivatives	-
pos_3805	metab_3804	2-Formaminobenzoylacetate	C10H9NO4	-	2.71602	208.061	1.31066	1.09162	0.000386	0.002061	pos	5.0093	5.1331	4.7779	4.7972	5.0767	5.0648	5.5416	5.1497	5.5803	5.4424	5.436	5.45												Bile acids, alcohols and derivatives	C24H36O4	-	Lipids and lipid-like molecules	-
pos_3846	metab_3845	2-Hydroxyfelbamate	C11H14N2O5	HMDB0060670	2.79335	299.062	1.27337	1.13753	0.01639	0.03178	pos	3.714	3.8152	3.7856	3.5913	3.7516	3.857	4.9407	4.0092	4.1885	3.9754	4.097	4.3971												-	C17H12O3	-	-	-
pos_3881	metab_3880	Hexyl glucoside	C12H24O6	HMDB0031688	2.85552	306.192	1.23437	1.08682	0.0003219	0.001842	pos	4.5571	4.5265	4.3278	4.4195	4.6308	4.63	4.9633	4.7419	5.1303	4.9074	4.8602	4.8402												Sesquiterpenoids	C15H22O3	-	Lipids and lipid-like molecules	-
pos_3890	metab_3889	12-Oxo-2,3-dinor-10,15-phytodienoic acid	C16H24O3	HMDB0032090	2.88602	309.143	1.75104	1.26363	0.0005301	0.002523	pos	3.1265	3.6825	3.036	3.0027	3.023	3.6127	4.261	3.64	4.162	3.9199	4.3103	4.3245												-	C11H23NO2	-	-	-
pos_3923	metab_3922	Hydrocortamate	C27H41NO6	HMDB0014907	2.9328	440.277	1.40044	1.20171	0.04979	0.07971	pos	3.2139	3.7173	4.6992	3.1619	3.2361	4.4001	5.1641	4.3686	4.3597	4.3792	3.8131	4.8654												Not Available	C20H17FO2S	-	Benzenoids	-
pos_3938	metab_3937	(3-Arylcarbonyl)-alanine	C10H11NO3	-	2.97092	194.082	1.02695	1.05467	0.002437	0.007361	pos	5.1323	5.0175	5.0928	5.1396	5.1726	5.1752	5.4254	5.2204	5.6357	5.4063	5.355	5.3722												Flavonoid glycosides	C28H32O15	-	Phenylpropanoids and polyketides	C10039
pos_3978	metab_3977	3-Indoleacetic Acid	C10H9NO2	-	3.05597	176.071	1.00524	1.06352	0.002953	0.00845	pos	4.7275	4.6697	4.5432	4.4577	4.7411	4.723	5.0853	4.8423	5.1331	4.7673	4.901	4.9069												Fatty alcohols	C11H16O	-	Lipids and lipid-like molecules	-
pos_4023	metab_4022	Oxandrolone	C19H30O3	HMDB0014759	3.15467	370.234	1.71379	1.22087	8.479e-05	0.0009229	pos	3.316	3.5299	3.496	2.961	3.3479	3.533	3.8906	3.961	4.3807	4.136	4.1911	4.0805												Fatty alcohol esters	C19H26O3	-	Lipids and lipid-like molecules	-
pos_4024	metab_4023	2,4-Octadiene	C8H14	HMDB0061900	3.16227	152.144	2.5602	1.70831	0.0001246	0.001081	pos	2.1942	2.2071	2.0833	2.1425	2.2163	2.2166	4.3154	3.3072	3.9744	3.6185	3.6503	3.4507												Indoles	C9H9NO	-	Organoheterocyclic compounds	-
pos_4040	metab_4039	Zanthodioline	C16H19NO5	HMDB0031929	3.19392	323.161	1.19323	1.07654	5.439e-06	0.0004479	pos	4.4292	4.4291	4.3508	4.3243	4.5076	4.4556	4.8089	4.6494	4.8288	4.7835	4.7231	4.7301												Flavans	C25H24O10	-	Phenylpropanoids and polyketides	-
pos_4062	metab_4061	Valyl-Asparagine	C9H17N3O4	HMDB0029122	3.23962	214.119	2.78208	1.88894	0.0002487	0.001564	pos	2.0619	2.0748	1.9513	2.0103	2.0839	2.0842	4.5352	3.8653	4.1122	3.7973	3.8216	3.0354												Fatty acids and conjugates	C12H16O7S	-	Lipids and lipid-like molecules	-
pos_4068	metab_4067	Cysteinyl-Gamma-glutamate	C8H15N3O4S	HMDB0028789	3.24723	313.096	1.80968	1.20029	0.0001238	0.001079	pos	4.035	4.3607	3.9082	3.8782	4.2456	4.2255	5.3624	4.7393	5.1239	4.8156	4.8096	4.7385												Carbohydrates and carbohydrate conjugates	C17H20N2O8S	-	Organic oxygen compounds	-
pos_4082	metab_4081	12-Hydroxydodecanoic acid	C12H24O3	HMDB0002059	3.27763	258.207	1.08457	1.06671	0.003537	0.009676	pos	5.2455	5.3458	4.9945	5.0103	5.2645	5.2611	5.6916	5.213	5.5929	5.6219	5.5289	5.5496												-	C15H18O3	-	-	C02206
pos_4096	metab_4095	Histidinyl-Tyrosine	C15H18N4O4	HMDB0028897	3.30805	283.12	1.70752	1.23202	0.001337	0.00475	pos	3.3863	3.7956	3.1586	3.1678	3.8021	3.7932	4.7016	3.8207	4.6494	4.1966	4.3892	4.241												Carbonyl compounds	C11H14O	-	Organic oxygen compounds	-
pos_4128	metab_4127	L,L-Cyclo(leucylprolyl)	C11H18N2O2	HMDB0034276	3.37652	211.144	1.12822	1.08477	0.002757	0.008048	pos	4.2509	4.3049	4.1772	4.2302	4.3495	4.382	4.7742	4.4579	4.8556	4.4025	4.687	4.6937												Monoterpenoids	C12H16O	-	Lipids and lipid-like molecules	-
pos_4129	metab_4128	Glutaminylisoleucine	C11H21N3O4	HMDB0028800	3.37652	242.15	2.49401	1.65307	9.936e-05	0.0009843	pos	2.2189	2.2319	2.108	2.1672	2.4182	2.2414	4.2266	3.7933	3.7044	3.6226	3.691	3.0874												Terpene lactones	C21H28O8	-	Lipids and lipid-like molecules	-
pos_4134	metab_4133	Triacanthine	C10H13N5	-	3.39173	204.125	1.29996	1.09742	0.0002649	0.001626	pos	4.4515	4.6553	4.3686	4.3923	4.67	4.6844	5.0499	4.989	5.1671	4.7887	4.9481	4.9315												Carbonyl compounds	C15H24O3	-	Organic oxygen compounds	-
pos_4166	metab_4165	3-Formyl-6-hydroxyindole	C9H7NO2	HMDB0031172	3.47548	162.055	1.51688	1.11322	0.0006804	0.002969	pos	5.4929	5.8415	5.1112	5.4741	5.6673	5.6391	6.2724	5.8708	6.3477	6.053	6.2365	6.2066												-	C18H30O4	-	-	C07357
pos_4174	metab_4173	3S-aminodecanoic acid	C10H21NO2	LMFA01100011	3.49837	188.165	1.44575	1.13226	3.21e-05	0.0006376	pos	3.8203	3.9534	3.7063	3.7255	3.9755	3.9563	4.38	4.3088	4.612	4.3251	4.2682	4.3033												Lineolic acids and derivatives	C18H32O5	-	Lipids and lipid-like molecules	-
pos_4197	metab_4196	D-Pantothenic acid	C9H17NO5	-	3.5668	184.097	1.32442	1.08347	4.149e-05	0.0006971	pos	5.0636	5.0921	4.9373	4.9048	5.1567	5.1809	5.5742	5.4054	5.5518	5.4813	5.4083	5.4488												-	C18H28O2	-	-	-
pos_4218	metab_4217	Isobutyryl carnitine	C11H21NO4	-	3.6277	232.155	1.16706	1.08696	0.001739	0.005729	pos	4.043	3.9555	4.0051	4.0118	4.0443	4.0928	4.333	4.2741	4.6808	4.3389	4.3036	4.3185												Eicosanoids	C20H34O5	-	Lipids and lipid-like molecules	-
pos_4220	metab_4219	Trans-O-Methylgrandmarin	C16H18O6	HMDB0039031	3.6277	370.129	1.31531	1.15191	0.03088	0.05338	pos	3.8118	3.8698	4.3537	2.9729	4.0845	4.211	4.4592	4.2182	4.5963	4.468	4.5297	4.5744												-	C24H34O2	-	-	-
pos_4263	metab_4262	Sylvopinol	C8H10O3	HMDB0030570	3.75692	155.07	1.14621	1.07097	0.0005287	0.002519	pos	4.7079	4.7687	4.6187	4.6035	4.7768	4.7629	5.0569	4.8313	5.1286	5.2067	5.011	5.0073												Diterpenoids	C24H38O5	-	Lipids and lipid-like molecules	-
pos_4269	metab_4268	Trigoforin	C12H12O2	HMDB0029495	3.76447	189.091	1.32298	1.09533	0.0003098	0.001801	pos	4.8703	4.8508	4.6448	4.5846	4.914	4.8995	5.4015	4.967	5.3487	5.2942	5.2573	5.2377												Fatty acids and conjugates	C18H34O4	-	Lipids and lipid-like molecules	-
pos_4294	metab_4293	P-Acetaminobenzaldehyde	C9H9NO2	-	3.8328	164.071	1.45109	1.11857	0.004389	0.01136	pos	5.3906	5.7789	4.8592	5.1359	5.5706	5.5516	6.3544	5.6864	6.2371	5.7959	6.0234	6.0179												Glycerophosphoserines	C42H68NO10P	-	Lipids and lipid-like molecules	-
pos_4324	metab_4323	Dihydroferulic acid 4-sulfate	C10H12O7S	HMDB0041724	3.94695	277.038	1.73854	1.2851	0.01204	0.02478	pos	2.9953	4.1608	2.6083	3.86	3.1562	2.7904	4.4919	4.1356	3.8903	4.5472	4.0797	4.0063												Glycerophosphoserines	C44H74NO10P	-	Lipids and lipid-like molecules	-
pos_4329	metab_4328	7alpha-hydroxy-3-oxochol-4-en-24-oic Acid	C24H36O4	HMDB0062744;LMST04010239	3.96213	411.25	1.54109	1.19674	0.01477	0.02926	pos	3.2942	3.8563	4.5186	3.1486	3.8456	4.1768	4.9774	4.3936	4.5035	4.5249	4.2448	4.6899												Amino acids, peptides, and analogues	C5H7NO3	Amino acids;-	Organic acids and derivatives	C01879;C02237
pos_4331	metab_4330	2'-Hydroxyfurano[2'',3'':4',3']chalcone	C17H12O3	LMPK12120002	3.96973	265.086	1.23065	1.08335	0.0001471	0.001175	pos	4.3846	4.3684	4.1919	4.3045	4.4632	4.4877	4.7659	4.6885	4.7021	4.8113	4.7111	4.7049												Glycerophosphoserines	C39H74NO10P	-	Lipids and lipid-like molecules	-
pos_4369	metab_4368	C75	C14H22O4	-	4.06108	255.16	1.36662	1.11446	8.915e-05	0.0009392	pos	4.0187	3.9587	3.9671	3.8981	4.1443	4.1253	4.4663	4.3497	4.7464	4.4483	4.4424	4.4182												Glycerophosphoethanolamines	C43H74NO8P	-	Lipids and lipid-like molecules	-
pos_4418	metab_4417	Procurcumadiol	C15H22O3	HMDB0034721	4.1905	292.191	1.00309	1.05891	0.0007538	0.003184	pos	4.6248	4.5701	4.3552	4.4952	4.6295	4.621	4.8615	4.7692	4.9308	4.7412	4.7858	4.8139												Lineolic acids and derivatives	C37H68O5	-	Lipids and lipid-like molecules	C00165
pos_4493	metab_4492	11-amino-undecanoic acid	C11H23NO2	LMFA01100004	4.36523	202.18	1.39905	1.11331	9.396e-05	0.0009702	pos	4.2997	4.3729	4.1071	4.2158	4.4132	4.3784	4.7541	4.7692	5.0743	4.7084	4.7087	4.6946												Terpene glycosides	C42H66O13	-	Lipids and lipid-like molecules	-
pos_4502	metab_4501	Sulindac sulfide	C20H17FO2S	HMDB0060614	4.39562	341.103	1.19161	1.14522	0.01822	0.03464	pos	3.5106	2.8174	3.433	3.1599	2.7946	3.5372	3.6549	3.4607	3.7477	3.61	3.7415	3.8361												Phosphosphingolipids	C18H38NO5P	-	Lipids and lipid-like molecules	C06124
pos_4530	metab_4529	Diosmin	C28H32O15	HMDB0029548	4.46402	609.182	3.5278	2.4464	2e-06	0.000393	pos	3.1682	1.8514	1.7287	1.7873	1.8604	1.8608	5.5346	4.1536	5.2733	5.1258	4.9606	4.9427												-	C18H37NO2	-	-	C16512
pos_4621	metab_4620	4-(2,6,6-Trimethylcyclohexa-1,3-dienyl)but-3-en-2-one	C13H18O	-	4.71398	191.143	1.4369	1.11904	8.887e-05	0.0009387	pos	4.1947	4.3261	4.1183	4.1187	4.295	4.2475	4.7562	4.4663	4.8461	4.8789	4.6779	4.6899												Amines	C20H37NO2	-	Organic nitrogen compounds	C13828
pos_4650	metab_4649	5-Phenyl-1-pentanol	C11H16O	HMDB0031624	4.7975	165.128	1.38543	1.10827	3.317e-05	0.0006454	pos	4.3714	4.4053	4.1924	4.2114	4.434	4.4337	4.8826	4.6491	4.9918	4.8217	4.7555	4.7636												Steroid lactones	C30H38O9	-	Lipids and lipid-like molecules	-
pos_4657	metab_4656	1-Methoxypyrene-6,7-oxide	C17H12O2	-	4.82783	249.091	1.29213	1.0707	8.79e-05	0.0009342	pos	5.7597	5.6586	5.4997	5.5847	5.7581	5.7715	6.1712	6.0372	6.0839	6.0727	6.0311	6.0435												Carbohydrates and carbohydrate conjugates	C15H28O10	-	Organic oxygen compounds	-
pos_4691	metab_4690	(2Z,8S,9Z)-2,9-Heptadecadiene-8-hydroxy-4,6-diyne-1-yl acetate	C19H26O3	HMDB0031038	4.9109	325.176	1.08451	1.06676	0.002926	0.008393	pos	5.2627	5.3091	4.9124	5.0674	5.2459	5.2083	5.5702	5.2359	5.7154	5.5135	5.5402	5.5018												Benzoic acids and derivatives	C22H34O4	-	Benzenoids	-
pos_4693	metab_4692	INDOLE-3-CARBINOL	C9H9NO	HMDB0005785	4.91842	148.076	1.07841	1.10535	0.04557	0.07401	pos	3.9744	4.2227	4.0619	3.9052	4.1471	4.1191	5.2517	4.1772	4.5731	4.1806	4.4103	4.4102												-	C18H32O3	-	-	C14767
pos_4707	metab_4706	Silidianin	C25H24O10	HMDB0030584	4.94097	526.172	1.20971	0.927695	0.003414	0.009422	pos	5.4833	5.4698	5.3247	5.5686	5.4779	5.4564	5.1509	5.0662	4.6694	5.1428	5.1684	5.2109												-	C20H34O3	-	-	-
pos_4748	metab_4747	1,2-Anthracenediol	C14H10O2	-	5.03103	211.075	1.75953	1.19299	0.001182	0.004344	pos	4.0092	4.1641	4.14	3.497	4.3312	4.3271	4.8746	4.7754	5.0072	4.8344	4.8413	4.8598												-	C24H36O5	-	-	-
pos_4768	metab_4767	5-(3-methoxyphenyl)-4-(sulfooxy)pentanoic acid	C12H16O7S	HMDB0127785	5.0685	337.096	1.31278	1.08965	5.944e-05	0.0007967	pos	4.8055	4.6483	4.513	4.6284	4.8132	4.7666	5.2686	5.0819	5.1231	5.0813	5.0314	5.1156												Amines	C13H17NO2	-	Organic nitrogen compounds	-
pos_4803	metab_4802	Zileuton O-glucuronide	C17H20N2O8S	HMDB0060914	5.1758	430.129	1.36332	1.08407	0.0001873	0.001351	pos	5.6081	5.621	5.2626	5.4031	5.5856	5.6353	5.9945	5.8266	6.0244	6.1035	5.9874	5.963												Sesquiterpenoids	C17H28O4	-	Lipids and lipid-like molecules	-
pos_4843	metab_4842	Alpha-Santonin	C15H18O3	LMPR0103190001	5.29058	247.133	1.80617	1.24448	0.0008837	0.003549	pos	3.6948	3.6837	3.2774	3.3641	3.8638	3.8606	5.0164	3.9627	4.2349	4.5884	4.621	4.6358												-	C18H30O5	-	-	-
pos_4870	metab_4869	4,4alpha,5,6-Tetrahydro-7-methyl-2(3H)-naphthalenone	C11H14O	HMDB0039803	5.39688	163.112	1.21696	1.08274	0.0002028	0.001404	pos	4.3903	4.3197	4.2197	4.3643	4.3713	4.3683	4.7035	4.5481	4.8568	4.8126	4.6313	4.6386												Indolecarboxylic acids and derivatives	C9H7NO2	-	Organoheterocyclic compounds	C19837
pos_4899	metab_4898	(S)-4-(4-Methylphenyl)-2-pentanone	C12H16O	HMDB0034177	5.50323	177.128	1.29507	1.10212	2.076e-05	0.0005663	pos	4.0229	3.9614	3.8439	3.888	4.0573	4.0243	4.4473	4.2097	4.4826	4.4141	4.3256	4.3462												-	C18H24O2	-	-	-
pos_4903	metab_4902	R1128B	C18H16O5	-	5.51842	313.107	1.05244	1.06823	0.002577	0.007666	pos	4.4277	4.2684	4.2254	4.3492	4.4464	4.3128	4.5792	4.4621	4.6839	4.8923	4.5869	4.5971												-	C16H24O5	-	-	-
pos_4917	metab_4916	3-O-Methylniveusin A	C21H28O8	HMDB0039084	5.54878	426.213	2.50504	2.21958	0.001241	0.004499	pos	2.1443	0.8218	0.7183	0.7672	1.5051	2.3759	3.4052	2.6758	3.6219	2.5527	3.0801	3.1607												-	C18H26O3	-	-	-
pos_4937	metab_4936	1-Hydroxyepiacorone	C15H24O3	HMDB0030918	5.61713	235.17	1.26904	1.08903	1.966e-05	0.0005576	pos	4.3605	4.3654	4.2065	4.2699	4.4348	4.4445	4.7654	4.6093	4.8378	4.7959	4.7024	4.6917												Hydroxycinnamic acids and derivatives	C16H20O9	-	Phenylpropanoids and polyketides	-
pos_4956	metab_4955	7S,8S-DiHOTrE	C18H30O4	LMFA02000226	5.66268	311.222	1.40826	1.08531	9.747e-06	0.0004898	pos	5.336	5.5649	5.3964	5.4097	5.5769	5.5624	6.0153	5.8693	5.9495	6.0596	5.8778	5.8738												Sesquiterpenoids	C15H18O3	-	Lipids and lipid-like molecules	C17490
pos_4996	metab_4995	Corchorifatty acid F	C18H32O5	HMDB0035919	5.77648	346.259	1.06795	1.07913	0.008859	0.01944	pos	4.5197	4.55	4.0817	4.2911	4.5114	4.4372	4.7799	4.4426	4.8146	5.0256	4.6723	4.7433												-	C14H18O2	-	-	-
pos_5052	metab_5051	9,12-Octadecadiynoic Acid	C18H28O2	LMFA01030540	5.88225	277.216	1.26358	1.06691	5.273e-05	0.0007529	pos	5.796	5.7995	5.6058	5.7273	5.8981	5.8789	6.1999	6.1427	6.298	6.135	6.1171	6.1342												Terpene lactones	C20H30O7	-	Lipids and lipid-like molecules	C17645
pos_5243	metab_5242	13,14-Dihydro-15-keto PGF2a	C20H34O5	HMDB0004685	6.09243	377.231	1.27821	1.0702	3.968e-05	0.0006785	pos	5.7582	5.7284	5.4991	5.6101	5.7546	5.7542	6.1333	5.9467	6.1793	6.1356	6.0443	6.0561												Amino acids, peptides, and analogues	C10H20N2O3	-	Organic acids and derivatives	-
pos_5246	metab_5245	16,16-dimethyl-6-keto Prostaglandin E1	C22H36O6	-	6.09243	397.257	1.27096	1.065	8.471e-06	0.0004751	pos	6.0286	5.97	5.8521	5.8929	6.0558	6.0152	6.4067	6.2382	6.4781	6.3534	6.3217	6.3429												Cyclic diarylheptanoids	C32H42O13	-	Phenylpropanoids and polyketides	-
pos_5346	metab_5345	Farnesyl acetone	C18H30O	-	6.20472	263.237	1.43419	1.10936	0.003584	0.009775	pos	5.1749	5.0262	5.1307	5.089	5.2148	5.197	6.0649	5.7425	5.922	5.2672	5.6019	5.6088												Carbohydrates and carbohydrate conjugates	C20H28O7	-	Organic oxygen compounds	-
pos_5354	metab_5353	Delta2-THA	C24H34O2	LMFA01030852	6.2122	355.263	1.26016	1.08222	0.001396	0.004895	pos	5.1926	4.9036	4.8808	5.2794	5.179	5.211	5.5666	5.4148	5.3985	5.8345	5.4814	5.4697												Fatty acids and conjugates	C21H36O3	-	Lipids and lipid-like molecules	-
pos_5355	metab_5354	(6b,7b,13R)-6,7-Diacetoxy-8,14-labdadiene-13-ol	C24H38O5	HMDB0035288	6.2122	448.303	1.42959	1.10523	0.0002636	0.001622	pos	5.1853	5.0829	4.7602	4.8395	5.1349	5.1596	5.8224	5.5016	5.5923	5.4278	5.5044	5.4876												Amino acids, peptides, and analogues	C23H26N2O5	-	Organic acids and derivatives	C21540
pos_5389	metab_5388	Octadecanedioic acid	C18H34O4	HMDB0000782;LMFA01170029	6.23467	359.218	1.31873	1.08131	0.0001344	0.001121	pos	5.3708	5.3732	5.1755	5.3539	5.5267	5.5243	6.0239	5.6832	5.9157	5.783	5.7843	5.7619												Not Available	C9H11NO	-	Organoheterocyclic compounds	-
pos_5523	metab_5522	Cassine	C18H35NO2	-	6.45075	298.274	1.29611	1.11193	0.007837	0.01767	pos	3.9837	4.8786	4.4512	4.3523	4.5871	4.549	4.9907	4.885	4.9015	4.9163	5.0999	5.0069												-	C14H18O2	-	-	-
pos_5539	metab_5538	D-erythro-Sphingosine C-17	C17H35NO2	-	6.47317	286.274	1.75822	1.15009	1.7e-05	0.0005515	pos	4.8168	5.3251	5.0013	4.897	5.106	5.074	6.0234	5.5875	5.655	5.9124	5.8061	5.7736												Not Available	C11H16O2	-	Organoheterocyclic compounds	-
pos_5887	metab_5886	PS(18:3(6Z,9Z,12Z)/18:4(6Z,9Z,12Z,15Z))	C42H68NO10P	LMGP03010382;HMDB0112453	7.2419	800.444	1.53021	0.870839	0.007883	0.01775	pos	5.643	6.1392	5.0888	5.598	6.0999	6.0404	4.7431	4.8651	4.6022	5.6306	5.1887	5.111												Terpene glycosides	C18H26O11	-	Lipids and lipid-like molecules	-
pos_6677	metab_6676	PS(18:2(9Z,12Z)/20:4(5Z,8Z,11Z,14Z))	C44H74NO10P	LMGP03010875;HMDB0012405	7.81533	830.491	1.37811	0.86936	0.03348	0.05717	pos	5.0483	5.0883	5.9325	6.0814	5.4728	5.3551	3.8886	5.1761	5.5056	4.7459	4.8699	4.4822												-	C32H43ClN2O9	-	-	C12045
pos_6696	metab_6695	Pyroglutamic acid	C5H7NO3	HMDB0000267	7.75498	162.076	1.08006	0.901528	0.0223	0.0408	pos	3.9065	4.3356	3.7467	3.9181	4.4457	4.3866	3.4551	3.5621	3.6677	3.9948	3.8432	3.7779												Quinolones and derivatives	C16H20NO4+	-	Organoheterocyclic compounds	-
pos_6716	metab_6715	PS(15:0/18:1(11Z))	C39H74NO10P	HMDB0112283	7.70228	786.465	2.13249	0.776226	0.0008665	0.003495	pos	5.3533	5.5387	5.1373	5.3228	5.7096	5.5964	3.7884	3.7238	4.4141	5.0222	4.0176	4.3811												Sesquiterpenoids	C20H30O7	-	Lipids and lipid-like molecules	C17641
pos_6784	metab_6783	PE(16:0/22:6(4Z,7Z,10Z,13Z,16Z,19Z))	C43H74NO8P	HMDB0008946;LMGP02010095	7.51363	764.522	1.20336	0.914917	0.01496	0.02954	pos	5.1837	5.1367	5.5527	6.0364	5.5225	5.4324	4.8814	5.0614	5.254	4.8564	5.067	4.9487												Estrane steroids	C18H24O3	-	Lipids and lipid-like molecules	C14209
pos_6794	metab_6793	DG(16:0/18:2(9Z,12Z)/0:0)	C37H68O5	HMDB0007103	7.49102	575.504	1.05688	0.937026	0.02264	0.04129	pos	5.8498	5.881	6.3809	6.6087	6.2003	6.2396	5.5464	5.8703	6.0884	5.7169	5.8359	5.7588												Amino acids, peptides, and analogues	C11H21N3O4	-	Organic acids and derivatives	-
pos_6833	metab_6832	Momordin Ia	C42H66O13	HMDB0041017	7.40042	801.439	1.35473	0.885617	0.01907	0.03593	pos	5.5027	6.0142	4.9226	5.4094	5.9035	5.8719	4.402	4.9184	4.7613	5.5547	5.1311	5.0098												Tetracarboxylic acids and derivatives	C31H40O12	-	Organic acids and derivatives	-
pos_6837	metab_6836	Sphingosine 1-phosphate	C18H38NO5P	HMDB0000277	7.40042	362.246	1.50261	0.856973	0.007006	0.01617	pos	4.7293	5.3854	4.5986	4.8054	5.4299	5.3803	3.7562	4.3965	4.2416	4.8648	4.4191	4.3153												Not Available	C13H14O4	-	Benzenoids	C10426
pos_7405	metab_7404	Palmitoyl Ethanolamide	C18H37NO2	LMFA08040057;LMFA08040013	6.57062	300.29	1.52882	1.10498	2.998e-05	0.0006254	pos	5.3743	5.5892	5.4206	5.4001	5.4992	5.4675	6.2908	5.9169	5.9616	5.9164	6.0836	6.0178												1-benzopyrans	C16H20N2O5	-	Organoheterocyclic compounds	-
pos_7522	metab_7521	Linoleoyl Ethanolamide	C20H37NO2	HMDB0012252	6.47317	324.29	1.69454	1.14576	0.0008788	0.003532	pos	4.6264	5.5161	5.0653	5.0557	5.2079	5.2374	6.0495	5.7079	5.8413	5.8344	5.9106	5.8405												Phenylbenzodioxanes	C18H16O6	-	Organoheterocyclic compounds	-
pos_7642	metab_7641	Physagulin C	C30H38O9	HMDB0038535	6.39063	565.246	1.1378	0.944888	0.0008013	0.003308	pos	6.5667	6.3167	6.2982	6.2425	6.4407	6.4543	6.1059	6.168	5.7763	6.0466	6.0465	6.0657												Phenethylamines	C8H11NO	Amines	Benzenoids	C00483
pos_7946	metab_7945	(2S)-2-Butanol O-[b-D-Apiofuranosyl-(1->6)-b-D-glucopyranoside]	C15H28O10	HMDB0041255	6.2197	410.199	1.34273	1.08827	0.0003471	0.001936	pos	5.2806	5.2071	5.0595	5.1622	5.3401	5.3556	5.9249	5.5002	5.8761	5.6158	5.6295	5.6318												-	C17H16O4	-	-	-
pos_7947	metab_7946	(Z)-2,4-Dihydroxy-6-(8-pentadecenyl)benzoic acid	C22H34O4	HMDB0039226	6.2197	363.252	1.24858	1.07118	0.000105	0.001005	pos	5.44	5.4475	5.2255	5.3104	5.5248	5.507	5.9042	5.6932	5.8672	5.8043	5.7559	5.7375												Pyrimidine 2'-deoxyribonucleosides	C10H16N2O7	-	Nucleosides, nucleotides, and analogues	-
pos_7979	metab_7978	Dimorphecolic acid	C18H32O3	LMFA02000152	6.20472	297.242	1.48042	1.08623	5.287e-05	0.000754	pos	6.226	6.2042	6.0457	6.1765	6.329	6.3146	6.9713	6.6096	6.9087	6.6572	6.6763	6.688												Isoindolines	C13H10N2O5	-	Organoheterocyclic compounds	-
pos_7997	metab_7996	8(S)-HETrE	C20H34O3	LMFA03050029	6.19722	305.248	1.21271	1.07097	1.113e-05	0.0005052	pos	4.9834	4.9025	4.8858	4.8883	4.9903	5.0252	5.4202	5.1699	5.2916	5.3297	5.2811	5.2905												Sesquiterpenoids	C13H22O3	-	Lipids and lipid-like molecules	-
pos_8018	metab_8017	4,12alpha-Dihydroxy-3-oxochol-4-en-24-oic Acid	C24H36O5	LMST04010434	6.18223	405.262	1.07204	1.04832	8.246e-05	0.0009139	pos	5.7743	5.6691	5.6031	5.5946	5.7483	5.7536	6.0073	5.9345	5.9498	6.0372	5.932	5.9367												Purines and purine derivatives	C25H27N7O3	-	Organoheterocyclic compounds	-
pos_8023	metab_8022	Ritalinic acid	C13H17NO2	HMDB0042008	6.18223	202.123	1.48678	1.25902	0.02331	0.0423	pos	2.7552	3.7211	2.7711	2.7032	3.4562	2.8947	4.5836	2.8267	3.9931	3.8114	3.9773	3.8484												Pterins and derivatives	C20H24N8O6	-	Organoheterocyclic compounds	C00664
pos_8082	metab_8081	(1(10)E,4a,5E)-1(10),5-Germacradiene-12-acetoxy-4,11-diol	C17H28O4	HMDB0038798	6.1523	261.185	1.15662	1.06648	9.502e-05	0.0009715	pos	4.9501	4.8869	4.7711	4.8145	5.0069	4.995	5.2814	5.1961	5.3227	5.198	5.1844	5.2003												Chlorohydrins	C17H25ClO2	-	Organohalogen compounds	-
pos_8213	metab_8212	8-iso-16-cyclohexyl-tetranor Prostaglandin E2	C22H34O5	-	6.09243	379.246	1.30876	1.07225	2.131e-05	0.0005723	pos	5.7726	5.7295	5.577	5.612	5.8071	5.7953	6.2066	5.9957	6.2493	6.1586	6.0703	6.0963												Eicosanoids	C20H32O5	-	Lipids and lipid-like molecules	C06315
pos_8234	metab_8233	2,3-dinor-PGE1	C18H30O5	LMFA03010169	6.08497	327.217	1.40488	1.07897	4.98e-06	0.0004479	pos	5.9298	5.8776	5.7783	5.815	5.9938	6.014	6.3927	6.2566	6.5034	6.4044	6.3087	6.3355												Carbohydrates and carbohydrate conjugates	C12H24N2O7	-	Organic oxygen compounds	-
pos_8242	metab_8241	Indole-3-carboxylic acid	C9H7NO2	HMDB0003320	6.08497	144.045	1.44527	1.15285	0.0009726	0.003798	pos	3.8495	3.8207	3.4548	3.5511	3.7976	3.7473	4.6625	3.926	4.2976	4.2561	4.2742	4.1957												-	C21H20O10	-	-	C01714
pos_8286	metab_8285	6,9,12-Octadecatriynoic acid	C18H24O2	LMFA01030554	6.06255	273.185	1.31275	1.06654	2.73e-05	0.000606	pos	6.3069	6.2552	6.0913	6.2002	6.3392	6.3201	6.6517	6.541	6.8384	6.7321	6.6162	6.6306												Monoterpenoids	C11H14O	-	Lipids and lipid-like molecules	-
pos_8288	metab_8287	3-Deoxyestrone	C18H22O	-	6.06255	255.174	1.32325	1.08157	2.656e-05	0.000599	pos	5.2447	5.1744	5.0264	5.1408	5.2551	5.2748	5.6115	5.4513	5.7619	5.6796	5.562	5.59												-	C12H16O3	-	-	-
pos_8341	metab_8340	Alhpa-tocopheronic acid	C16H24O5	LMPR02020062	6.03262	297.168	1.12371	1.06641	2.861e-05	0.0006179	pos	4.6398	4.5967	4.5554	4.6032	4.6741	4.7561	4.944	4.8433	5.0816	4.9371	4.9331	4.9356												Amino acids, peptides, and analogues	C17H28N2O5	-	Organic acids and derivatives	C21517
pos_8379	metab_8378	8-oxo-9,11-octadecadiynoic acid	C18H26O3	LMFA02000271	6.01758	291.196	1.35128	1.06486	1.423e-05	0.0005283	pos	6.7649	6.7343	6.582	6.6496	6.8058	6.7982	7.1756	7.0196	7.298	7.2397	7.0999	7.1135												Cresols	C7H8O	-	Benzenoids	C01468;C01467
pos_8397	metab_8396	1-O-2'-Hydroxy-4'-methoxycinnamoyl-b-D-glucose	C16H20O9	HMDB0040866	6.0101	321.1	1.07416	1.06014	0.0004961	0.002419	pos	5.1506	4.9576	4.8519	4.8568	4.9946	5.0215	5.3999	5.2877	5.3184	5.2367	5.1508	5.2346												Halobenzenes	C12H14ClNO	-	Benzenoids	-
pos_8403	metab_8402	Zedoarol	C15H18O3	HMDB0038202	6.0101	264.16	1.25108	1.10345	0.002263	0.006979	pos	4.4215	4.5652	4.3099	4.2691	4.591	4.4644	5.1815	4.7094	4.6803	4.7315	4.952	5.122												Fatty acid esters	C14H27NO5	-	Lipids and lipid-like molecules	-
pos_8557	metab_8556	C14:5n-1,3,5,7,9	C14H18O2	LMFA01030258	5.91235	219.138	1.35444	1.09181	4.485e-06	0.0004355	pos	4.783	4.7167	4.6001	4.6839	4.8178	4.8258	5.2122	5.0569	5.2983	5.1762	5.1443	5.1514												Terpene lactones	C10H16O2	-	Lipids and lipid-like molecules	-
pos_8659	metab_8658	Cinncassiol A	C20H30O7	HMDB0035164	5.81438	383.205	1.11672	1.05702	0.0002493	0.001565	pos	5.5432	5.538	5.3855	5.4761	5.5984	5.6027	5.8489	5.771	6.0474	5.8183	5.758	5.7906												Amino acids, peptides, and analogues	C9H16N2O4	-	Organic acids and derivatives	-
pos_8702	metab_8701	Valyl-Valine	C10H20N2O3	HMDB0029140	5.75373	199.145	1.96443	1.4204	0.000709	0.003053	pos	2.6575	2.268	1.8489	1.9078	2.6267	2.6341	3.4014	3.1313	3.5641	3.2672	3.2177	3.227												Hydroxycoumarins	C10H6O4	-	Phenylpropanoids and polyketides	-
pos_8747	metab_8746	Myricanene B 5-[arabinosyl-(1->6)-glucoside]	C32H42O13	HMDB0039348	5.66268	635.272	1.51391	1.14264	0.01618	0.03147	pos	5.0107	5.8088	5.6107	4.4375	5.7215	5.6739	6.3992	5.9665	6.3599	5.6982	6.2357	6.202												Monoterpenoids	C10H20O2	-	Lipids and lipid-like molecules	-
pos_8766	metab_8765	7-hydroxy Tetranor Iloprost	C18H26O5	-	5.63995	323.184	1.44248	1.10876	1.963e-05	0.0005576	pos	4.643	4.5724	4.4109	4.469	4.6747	4.706	5.1214	4.9497	5.2382	5.1444	4.9818	5.0292												Medium-chain hydroxy acids and derivatives	C12H24O3	-	Organic acids and derivatives	-
pos_8770	metab_8769	Cinncassiol C	C20H28O7	HMDB0035166	5.63237	381.189	1.34896	1.08019	7.214e-05	0.0008596	pos	5.6717	5.5697	5.3911	5.5013	5.7176	5.6734	6.0544	5.9121	6.2349	6.0669	5.9651	5.9768												Diterpenoids	C24H28O4	-	Lipids and lipid-like molecules	C08608
pos_8830	metab_8829	3,4-Dimethyl-5-propyl-2-furandodecanoic acid	C21H36O3	HMDB0112076	5.50323	381.239	1.53005	1.12544	2.127e-05	0.0005723	pos	4.5201	4.5387	4.3806	4.3456	4.6917	4.6422	5.1765	5.0643	5.1609	4.9463	5.068	5.1032												Amino acids, peptides, and analogues	C14H25N3O4S	-	Organic acids and derivatives	-
pos_8844	metab_8843	Quinaprilat	C23H26N2O5	HMDB0042005	5.46527	428.219	1.28098	1.09387	0.0002529	0.001581	pos	4.6137	4.6005	4.3505	4.4762	4.6738	4.7026	5.1447	4.9828	5.1601	4.7943	4.9492	4.9638												Amino acids, peptides, and analogues	C11H20N2O3	-	Organic acids and derivatives	-
pos_8853	metab_8852	5-Acetyl-2,3-dihydro-1H-pyrrolizine	C9H11NO	HMDB0040051	5.4501	150.092	1.03333	1.06119	0.001722	0.005691	pos	5.0168	5.1042	4.8497	4.8761	5.0825	5.0771	5.4732	5.1076	5.4225	5.2074	5.3176	5.3136												Carbohydrates and carbohydrate conjugates	C20H37N3O13	-	Organic oxygen compounds	C01925
pos_8863	metab_8862	5,7,9,11,13-tetradecapentaenoic acid	C14H18O2	LMFA01030258	5.41965	219.138	1.40107	1.11639	4.202e-05	0.0007	pos	4.0731	4.0448	3.9339	3.957	4.1015	4.115	4.5767	4.3278	4.6826	4.5537	4.4164	4.491												Isoflavonoid O-glycosides	C23H24O10	-	Phenylpropanoids and polyketides	-
pos_8872	metab_8871	Dihydroactinidiolide	C11H16O2	HMDB0035240	5.39688	181.122	1.27967	1.09171	0.000292	0.001733	pos	4.3558	4.2863	4.2052	4.3506	4.3572	4.3517	4.7121	4.542	4.8716	4.8697	4.64	4.6477												Fatty acyl glycosides	C19H24O8	-	Lipids and lipid-like molecules	-
pos_8875	metab_8874	DDA	C10H16O	-	5.3893	153.128	1.23443	1.09971	0.000471	0.002333	pos	3.8861	3.7521	3.6644	3.8816	3.829	3.8533	4.2024	4.003	4.3487	4.3631	4.1305	4.1001												Benzyloxycarbonyls	C9H10O2	-	Benzenoids	-
pos_8921	metab_8920	Oleoside dimethyl ester	C18H26O11	HMDB0031350	5.26782	441.134	1.28552	1.09557	0.004837	0.01223	pos	4.6555	4.8982	4.8816	4.8417	5.2755	5.2669	5.3756	5.1107	5.6116	5.6804	5.4359	5.4574												Cresols	C7H8O	-	Benzenoids	C01468
pos_8941	metab_8940	Ansamitocin P3	C32H43ClN2O9	LMPK04000039	5.21355	635.272	1.39771	1.08308	3.746e-05	0.0006637	pos	5.9664	5.8434	5.7929	5.673	5.9949	5.9756	6.4531	6.3834	6.4773	6.1656	6.3426	6.3519												Hydroxycoumarins	C14H14O3	-	Phenylpropanoids and polyketides	C18080
pos_8963	metab_8962	Rutalinium	C16H20NO4+	HMDB0033348	5.1758	603.27	1.47731	1.10338	0.0007444	0.003153	pos	5.458	5.5231	5.008	5.2456	5.5279	5.5637	5.9935	5.7798	6.039	6.0371	5.8974	5.9238												Pyridoindoles	C12H12N2O2	-	Organoheterocyclic compounds	-
pos_9018	metab_9017	3''-Hydroxy-geranylhydroquinone	C16H22O3	-	5.0685	263.164	1.27384	1.08738	5.112e-05	0.0007485	pos	4.5011	4.5016	4.323	4.3959	4.5968	4.5961	4.9316	4.7913	4.9898	4.9054	4.8078	4.844												-	C9H12O2	-	-	-
pos_9033	metab_9032	Cinncassiol C3	C20H30O7	HMDB0036859	5.05345	383.204	1.30115	1.07773	1.962e-05	0.0005576	pos	5.2545	5.2461	5.1112	5.1547	5.3112	5.3399	5.6382	5.5563	5.8236	5.6635	5.5713	5.6054												Not Available	C16H17NO3	-	Organoheterocyclic compounds	C10174
pos_9085	metab_9084	4-hydroxyestradiol	C18H24O3	HMDB0005896;LMST02010028	4.99378	289.18	1.43726	1.10957	5.237e-05	0.0007524	pos	4.6769	4.6454	4.4239	4.5499	4.7131	4.7538	5.1726	4.985	5.3787	5.1404	5.0566	5.0682												Purines and purine derivatives	C12H11N5	-	Organoheterocyclic compounds	C11263
pos_9093	metab_9092	Isoleucyl-Glutamine	C11H21N3O4	HMDB0028905	4.97118	242.15	2.59239	1.6076	0.0004518	0.002269	pos	2.674	2.6983	2.5625	2.6221	2.6962	2.6965	5.1025	4.1468	4.5812	3.9747	4.1195	3.7157												Amino acids, peptides, and analogues	C13H14N2O3	-	Organic acids and derivatives	-
pos_9131	metab_9130	Coronafacic acid	C12H16O3	-	4.92592	209.117	1.29407	1.08879	3.74e-05	0.0006637	pos	4.618	4.5246	4.432	4.4176	4.6526	4.6539	5.0018	4.8443	5.054	4.984	4.9174	4.9201												Carbohydrates and carbohydrate conjugates	C16H25NO9	-	Organic oxygen compounds	-
pos_9163	metab_9162	Fluprostenol Lactone Diol	C18H19F3O5	-	4.88087	373.129	1.34521	1.09044	5.167e-06	0.0004479	pos	4.7022	4.6705	4.5365	4.6724	4.7578	4.7887	5.198	5.1147	5.1445	5.0955	5.0173	5.0993												N-acylpiperidines	C17H23NO3	-	Organoheterocyclic compounds	-
pos_9215	metab_9214	6-Hydroxysandoricin	C31H40O12	HMDB0037556	4.7595	637.288	1.22155	1.08493	0.0009399	0.003705	pos	4.6939	4.6193	4.6239	4.6975	4.7901	4.8362	5.1238	5.1567	5.3443	4.8284	5.1211	5.0862												Carbonyl compounds	C10H12O4	-	Organic oxygen compounds	-
pos_9221	metab_9220	3-Ethyltoluene	C9H12	-	4.7595	121.101	1.38852	1.10242	1.835e-05	0.0005576	pos	4.517	4.5337	4.4037	4.396	4.5787	4.5778	5.0618	4.7834	5.0757	5.0236	4.9063	4.9201												Amino acids, peptides, and analogues	C12H18N2O4	-	Organic acids and derivatives	-
pos_9234	metab_9233	1'-Acetoxychavicol acetate	C13H14O4	HMDB0041005	4.72915	235.097	1.17271	1.08471	0.0002374	0.001515	pos	4.1411	4.0817	3.8822	4.149	4.1993	4.1928	4.5262	4.5996	4.3953	4.4059	4.3796	4.43												Indolyl carboxylic acids and derivatives	C17H21NO4	-	Organoheterocyclic compounds	-
pos_9238	metab_9237	Formylfusarochromanone	C16H20N2O5	HMDB0038970	4.72155	303.134	1.39507	1.12441	0.004569	0.01171	pos	4.4797	4.5148	4.0346	4.165	4.7295	4.794	5.2837	4.9937	4.969	4.8837	4.8813	5.03												Indolines	C9H9NO2	-	Organoheterocyclic compounds	C05834
pos_9240	metab_9239	Americanin A	C18H16O6	HMDB0030834	4.71398	329.102	1.05216	1.05475	0.001526	0.005214	pos	5.3049	5.1853	4.9822	5.1096	5.2752	5.2665	5.4945	5.4338	5.4756	5.5514	5.4338	5.4381												Isoflav-2-enes	C16H12O3	-	Phenylpropanoids and polyketides	-
pos_9254	metab_9253	Pyrimethamine-3-N-Oxide	C12H13ClN4O	-	4.69127	265.086	1.24283	1.08629	0.000521	0.002493	pos	4.6621	4.5821	4.2876	4.4427	4.6506	4.6327	4.9774	4.8071	4.9739	5.0485	4.892	4.9128												-	C16H14O4	-	-	C09939
pos_9280	metab_9279	Tyramine	C8H11NO	HMDB0000306	4.6611	138.091	1.46955	1.12761	0.0007232	0.003099	pos	4.229	4.1655	4.1356	4.0841	4.1812	4.1718	4.7405	4.4479	4.5631	5.0104	4.7013	4.6868												-	C6H8O3	-	-	-
pos_9284	metab_9283	Desmethoxymatteucinol	C17H16O4	LMPK12140192	4.65353	285.112	1.05742	1.04643	0.000247	0.001557	pos	6.0444	5.9519	5.7986	5.9297	6.0442	6.0244	6.2462	6.1721	6.238	6.354	6.2211	6.2284												Amino acids, peptides, and analogues	C14H18N2O4	-	Organic acids and derivatives	-
pos_9348	metab_9347	Thymidine glycol	C10H16N2O7	HMDB0042036	4.54752	309.129	2.30595	1.59794	0.02467	0.0443	pos	2.9166	0.343	2.787	2.7225	3.6721	3.8547	4.3467	4.1279	4.4372	4.4579	4.3436	4.3284												Amino acids, peptides, and analogues	C14H18N2O3	-	Organic acids and derivatives	-
pos_9402	metab_9401	Miraxanthin-V	C17H18N2O6	-	4.426	347.124	1.52249	1.09964	5.181e-06	0.0004479	pos	5.5645	5.5002	5.3811	5.3409	5.6084	5.6035	6.1477	5.9532	6.1541	6.0274	5.9882	6.0152												Thioesters	C7H12O3S	-	Organic acids and derivatives	-
pos_9446	metab_9445	5-Hydroxythalidomide	C13H10N2O5	HMDB0013871	4.35002	257.056	1.0748	1.07209	0.00268	0.007891	pos	4.5594	4.3921	4.1293	4.4774	4.48	4.5094	4.7926	4.6486	4.7386	4.7009	4.7857	4.7964												Not Available	C4H8O	-	Organoheterocyclic compounds	-
pos_9450	metab_9449	2-Ethyltoluene	C9H12	-	4.35002	121.102	1.41549	1.11627	1.044e-05	0.0004933	pos	4.1364	4.1934	4.0539	4.043	4.2204	4.1779	4.7238	4.4814	4.772	4.5601	4.5868	4.5811												Indoles	C13H16N2O	-	Organoheterocyclic compounds	-
pos_9457	metab_9456	4,5-Dihydrovomifoliol	C13H22O3	HMDB0040615	4.33482	227.164	1.58183	1.14376	0.0002188	0.001453	pos	4.4325	4.7059	4.1772	4.1714	4.5025	4.5547	5.1473	4.8764	5.258	5.0401	5.0112	5.0244												Purines and purine derivatives	C7H9N5	-	Organoheterocyclic compounds	-
pos_9497	metab_9496	CD 1790	C25H27N7O3	HMDB0060809	4.26647	456.214	1.52433	1.12911	0.0001903	0.001362	pos	4.5979	4.5616	4.2508	4.2715	4.6968	4.6196	5.214	4.9631	5.2249	5.0185	5.03	5.0348												Amino acids, peptides, and analogues	C10H16N4O4	-	Organic acids and derivatives	-
pos_9508	metab_9507	5-Formiminotetrahydrofolic acid	C20H24N8O6	HMDB0001534	4.24368	514.22	1.1847	1.13973	0.01802	0.03434	pos	3.8611	3.6194	3.9326	3.0446	3.599	3.6253	4.2007	3.9753	4.5572	3.6242	4.1611	4.1929												Gamma butyrolactones	C14H18O5	-	Organoheterocyclic compounds	-
pos_9540	metab_9539	Panaxydol chlorohydrin	C17H25ClO2	HMDB0039534	4.1905	329.186	2.56658	1.60124	0.0008634	0.003486	pos	3.1142	2.7063	2.5818	2.6414	2.7155	2.7158	5.5299	3.8339	4.681	4.2392	4.0562	4.041												Alcohols and polyols	C7H12O6	-	Organic oxygen compounds	C00296;C06746
pos_9566	metab_9565	Lipoxin B4	C20H32O5	HMDB0005082	4.12955	317.208	2.14669	1.59642	0.01519	0.0299	pos	2.4831	2.7946	2.3718	2.4312	2.5052	2.5055	5.3679	2.6671	3.8913	3.0359	4.5687	4.5576												Sesquiterpenoids	C15H22O2	-	Lipids and lipid-like molecules	-
pos_9600	metab_9599	4-Heptyloxybenzoic acid	C14H20O3	-	4.0687	237.149	1.3912	1.10282	1.238e-05	0.0005179	pos	4.5413	4.4827	4.366	4.4314	4.6083	4.5873	4.9956	4.8519	5.1574	4.9611	4.9087	4.9216												Amino acids, peptides, and analogues	C14H23N3O8S	-	Organic acids and derivatives	-
pos_9614	metab_9613	1-[(5-Amino-5-carboxypentyl)amino]-1-deoxyfructose	C12H24N2O7	HMDB0034879	4.04587	353.127	1.71092	1.16797	4.294e-05	0.0007022	pos	4.2237	4.2742	4.0389	4.1335	4.3485	4.3092	5.2795	4.7964	5.0218	4.8206	4.8414	4.8213												Terpene lactones	C20H26O6	-	Lipids and lipid-like molecules	-
pos_9622	metab_9621	Isovitexin	C21H20O10	LMPK12110338	4.03827	433.114	1.26703	1.09061	1.889e-05	0.0005576	pos	4.3353	4.2051	4.0866	4.2789	4.2771	4.3105	4.591	4.528	4.6629	4.7742	4.6566	4.5921												Quinoline carboxylic acids	C11H9NO4	-	Organoheterocyclic compounds	C05830
pos_9650	metab_9649	4-Isopropylphenylacetaldehyde	C11H14O	HMDB0041493	3.98493	163.112	1.25864	1.09115	0.0004686	0.002326	pos	4.5802	4.646	4.3711	4.4085	4.6661	4.6443	5.0409	4.7188	5.1662	5.0182	4.9255	4.9392												Carbonyl compounds	C3H6O2	-	Organic oxygen compounds	C00969
pos_9653	metab_9652	12-oxo-5E,8E,10Z-dodecatrienoic acid	C12H16O3	LMFA01060095	3.97733	209.118	1.29844	1.09438	0.0003465	0.001936	pos	4.643	4.734	4.4676	4.483	4.7281	4.7269	5.1254	4.7959	5.2519	5.1448	5.0401	5.0463												Amino acids, peptides, and analogues	C5H10N2O	-	Organic acids and derivatives	-
pos_9660	metab_9659	Perindoprilat	C17H28N2O5	HMDB0060574	3.96213	341.207	1.72075	1.19869	0.0009485	0.003727	pos	3.8914	4.1385	3.5735	3.5961	4.2625	4.3059	4.9236	4.5947	4.932	4.5249	4.7522	4.7618												Amino acids, peptides, and analogues	C10H23N3O3	-	Organic acids and derivatives	-
pos_9677	metab_9676	Abrine	C12H14N2O2	-	3.9241	219.113	1.30524	1.11124	0.001255	0.004533	pos	4.2802	4.5842	4.0834	4.1667	4.4143	4.4165	4.944	4.5808	5.0965	4.6406	4.7879	4.7804												Not Available	C11H19NO8	-	Alkaloids and derivatives	-
pos_9679	metab_9678	Ent-Corey PG-Lactone Diol	C15H24O4	-	3.91648	269.175	1.44794	1.12768	0.0002357	0.001511	pos	4.2672	4.4001	4.0606	3.9919	4.3524	4.3488	4.893	4.4757	4.9331	4.8643	4.7367	4.7649												Tryptamines and derivatives	C12H16N2	-	Organoheterocyclic compounds	C08302
pos_9729	metab_9728	3-propan-2-yl-2,3,6,7,8,8a-hexahydropyrrolo[1,2-a]pyrazine-1,4-dione	C10H16N2O2	-	3.78718	197.129	1.57606	1.26516	0.025	0.04479	pos	2.5293	2.0113	3.4447	3.0341	3.5351	3.5483	3.6498	3.9155	4.2235	3.5371	3.8054	3.7733												Carbonyl compounds	C5H11NO	-	Organic oxygen compounds	C12455
pos_9759	metab_9758	Cumene	C9H12	-	3.75692	121.102	1.4211	1.09609	0.0001945	0.001381	pos	5.3501	5.4513	5.0642	5.1541	5.4432	5.4469	5.8749	5.6461	6.0138	5.879	5.778	5.7799												Carbohydrates and carbohydrate conjugates	C8H15NO6	Monosaccharides	Organic oxygen compounds	C00645
pos_9760	metab_9759	M-Cresol	C7H8O	HMDB0002048	3.75692	109.065	1.23104	1.08373	4.082e-05	0.0006909	pos	4.4175	4.4418	4.315	4.3154	4.4658	4.489	4.7986	4.6138	4.9078	4.8369	4.7573	4.7413												Amino acids, peptides, and analogues	C12H18N2O4	-	Organic acids and derivatives	-
pos_9819	metab_9818	Norketamine	C12H14ClNO	HMDB0060549	3.6277	206.073	2.17053	1.38693	0.001917	0.006168	pos	3.7899	3.8617	2.5827	2.5673	3.5823	3.3562	4.9472	4.3675	4.7343	4.3919	4.5577	4.3781												Pyridinecarboxylic acids and derivatives	C8H9NO4	-	Organoheterocyclic compounds	C00847
pos_9836	metab_9835	3-hydroxyhexanoyl carnitine	C14H27NO5	HMDB0061633	3.58203	290.197	1.17763	1.07259	0.0001621	0.00124	pos	4.846	4.7981	4.6323	4.6973	4.8756	4.9129	5.1835	5.0167	5.2885	5.1755	5.0778	5.1074												Pterins and derivatives	C9H13N5O3	-	Organoheterocyclic compounds	C04244
pos_9855	metab_9854	Dihydronepetalactone	C10H16O2	HMDB0035829	3.55157	169.123	1.53335	1.128	2.673e-06	0.0003952	pos	4.2929	4.4002	4.337	4.2451	4.4938	4.4839	5.0636	4.8795	5.0625	4.8143	4.8898	4.9016												Indolyl carboxylic acids and derivatives	C10H9NO3	-	Organoheterocyclic compounds	-
pos_9870	metab_9869	3,4-Dimethylstyrene	C10H12	-	3.52118	133.101	1.28744	1.09181	0.0004958	0.002418	pos	4.8137	4.8501	4.613	4.5729	4.8145	4.8318	5.3641	4.8885	5.2787	5.2487	5.1579	5.1733												Pyranones and derivatives	C7H10O3	-	Organoheterocyclic compounds	-
pos_9880	metab_9879	Threoninyl-Proline	C9H16N2O4	HMDB0029069	3.50598	217.119	1.98708	1.3979	0.000729	0.003114	pos	2.2463	2.3426	2.247	2.1535	3.0996	2.7769	3.4569	3.3863	3.7465	3.4423	3.4317	3.3218												Amino acids, peptides, and analogues	C7H11NO4	-	Organic acids and derivatives	C01250
pos_9899	metab_9898	6-Formylumbelliferone	C10H6O4	HMDB0039147	3.4679	208.061	1.33091	1.11091	0.0003829	0.002054	pos	3.8639	3.9767	3.7701	3.9045	3.9692	3.9417	4.4289	4.3379	4.5504	4.3681	4.1083	4.2284												Amino acids, peptides, and analogues	C8H14N2O3	-	Organic acids and derivatives	-
pos_9919	metab_9918	Pilocarpidine	C10H14N2O2	-	3.4222	195.113	1.09058	1.07011	0.00182	0.005932	pos	4.8316	4.8942	4.6921	4.6826	4.9094	4.9173	5.3062	4.9545	5.3506	5.0161	5.1656	5.162												Not Available	C5H11N	-	Organoheterocyclic compounds	C01746
pos_9928	metab_9927	(1R,2S,3S,4R)-p-Menthane-2,3-diol	C10H20O2	HMDB0035723	3.40697	214.18	1.26053	1.09825	7.355e-05	0.0008697	pos	4.0756	3.9981	3.8301	3.9305	4.1092	4.115	4.4827	4.294	4.55	4.3662	4.3727	4.3591												Pyridinecarboxylic acids and derivatives	C8H7NO4	-	Organoheterocyclic compounds	C06050
pos_9944	metab_9943	3-Hydroxydodecanoic acid	C12H24O3	HMDB0000387	3.37652	258.207	1.27216	1.11307	0.005662	0.01376	pos	4.2515	4.4027	3.9821	3.9356	4.3207	4.313	4.7349	4.2498	4.681	5.0669	4.6545	4.6663												Pyrimidine nucleotide sugars	C20H31N4O16P	-	Nucleosides, nucleotides, and analogues	C00128
pos_9974	metab_9973	Norbixin	C24H28O4	LMPR01070209;HMDB0035832	3.31567	403.187	1.40525	1.16031	0.01252	0.02559	pos	4.2307	4.5151	3.7968	3.8034	4.3478	4.3088	5.1228	4.3693	5.4173	4.3052	4.9198	4.8731												Purine nucleotide sugars	C16H25N5O15P2	-	Nucleosides, nucleotides, and analogues	C00325
pos_9989	metab_9988	Alitame	C14H25N3O4S	HMDB0037324	3.30045	296.14	1.69789	1.24477	0.002704	0.007946	pos	3.617	3.7009	2.8238	3.151	3.4411	3.6114	4.9103	3.776	4.3327	4.1424	4.0576	4.1058												Not Available	C6H10O4	-	Organoheterocyclic compounds	-
pos_10025	metab_10024	Isoleucylproline	C11H20N2O3	HMDB0011174	3.24723	270.182	1.14454	1.10301	0.01374	0.02764	pos	3.9355	4.6004	4.0564	3.9254	4.3737	4.3838	4.8983	4.2518	4.7552	4.6482	4.6736	4.6577												Fatty acids and conjugates	C7H12O5	-	Lipids and lipid-like molecules	C04411
pos_10028	metab_10027	3-O-Benzyl-4,5-O-(1-methylethyldiene)-b-D-fructopyranose	C16H22O6	-	3.23962	311.147	1.39992	1.12512	0.001178	0.004337	pos	4.1428	4.1319	3.7184	3.8716	4.2029	4.2449	4.5916	4.4777	4.6978	4.5212	4.5223	4.5421												Amino acids, peptides, and analogues	C8H15NO3	-	Organic acids and derivatives	-
pos_10039	metab_10038	Hygromycin B	C20H37N3O13	HMDB0034229	3.22438	492.224	1.25188	1.1431	0.01551	0.03039	pos	3.1452	3.2514	3.12	3.7337	3.9312	3.6575	3.765	4.2393	3.7131	4.0317	4.0767	3.9965												Imidazoles	C6H8N2O2	-	Organoheterocyclic compounds	C20522
pos_10064	metab_10063	Wistin	C23H24O10	HMDB0030869	3.17865	524.154	1.77692	1.26302	0.003073	0.008711	pos	2.9566	3.06	3.5358	3.1109	3.8054	3.9249	4.2102	3.7445	4.9349	4.365	4.1911	4.3119												Pyrimidines and pyrimidine derivatives	C5H7N3O	-	Organoheterocyclic compounds	-
pos_10078	metab_10077	Methyl helianthenoate A glucoside	C19H24O8	HMDB0040899	3.15467	444.166	2.30808	1.32832	1.994e-05	0.0005576	pos	4.3041	4.1802	3.5495	3.5791	4.0854	3.8198	5.4922	4.9144	5.3047	5.3695	5.25	4.9141												Quaternary ammonium salts	C7H15NO2	Neurotransmitters	Organic nitrogen compounds	C01996
pos_10160	metab_10159	1-Phenylethyl formate	C9H10O2	HMDB0037715	3.0091	151.076	1.11961	1.06572	2.723e-05	0.0006059	pos	4.4441	4.4481	4.393	4.3871	4.4437	4.4497	4.7049	4.6625	4.8304	4.7681	4.6778	4.6719												Prenylated neoflavonoids	C25H24O5	-	Phenylpropanoids and polyketides	-
pos_10216	metab_10215	(S)-Acetoin	C4H8O2	-	2.9328	89.0603	1.32289	1.09982	0.0001297	0.001103	pos	4.3991	4.582	4.2267	4.3558	4.5303	4.5359	5.0449	4.7698	5.0097	4.827	4.8102	4.8253												Medium-chain keto acids and derivatives	C12H20O5	-	Organic acids and derivatives	-
pos_10227	metab_10226	P-cresol	C7H8O	HMDB0001858	2.92407	109.065	1.15247	1.07449	2.125e-05	0.0005723	pos	4.2797	4.2559	4.1923	4.1749	4.2751	4.2713	4.6072	4.4389	4.6621	4.5787	4.5295	4.5313												Fatty acids and conjugates	C8H14O4	Carboxylic acids	Lipids and lipid-like molecules	C08278
pos_10244	metab_10243	Osthenol	C14H14O3	HMDB0034130	2.89362	248.129	1.14163	0.912186	0.01071	0.02255	pos	4.7088	4.3519	4.0164	4.5614	4.5983	4.549	4.0422	4.0844	3.9903	4.1547	4.114	4.0464												Ethers	C12H22O4	-	Organic oxygen compounds	-
pos_10258	metab_10257	L-1,2,3,4-Tetrahydro-beta-carboline-3-carboxylic acid	C12H12N2O2	HMDB0035665	2.87078	217.098	1.75749	1.24459	0.0004197	0.002165	pos	3.1483	3.5969	2.9949	2.9458	3.4044	3.5857	4.3834	3.7498	4.1604	4.239	3.8751	4.076												Fatty acids and conjugates	C18H30O6	-	Lipids and lipid-like molecules	-
pos_10274	metab_10273	2,6Z-Nonadien-4-olide	C9H12O2	LMFA07040019	2.83913	153.091	1.23851	1.08502	7.907e-05	0.0008954	pos	4.3392	4.2941	4.2466	4.2627	4.3411	4.3453	4.7005	4.5317	4.8313	4.6902	4.6352	4.6379												Fatty acids and conjugates	C13H24O4	-	Lipids and lipid-like molecules	-
pos_10280	metab_10279	(E,E)-Trichostachine	C16H17NO3	HMDB0029374	2.8239	289.155	1.03511	1.06607	0.001068	0.004044	pos	4.6124	4.5181	4.3383	4.3726	4.5515	4.4881	4.8889	4.5508	4.8551	4.7964	4.7884	4.7773												Fatty acids and conjugates	C14H26O4	-	Lipids and lipid-like molecules	C11002
pos_10330	metab_10329	Cytokinin B	C12H11N5	HMDB0039238	2.75413	243.134	1.35946	1.17153	0.01017	0.02165	pos	3.5596	3.7623	3.5084	2.9265	3.7263	3.4701	4.4692	3.5068	4.4341	3.9883	4.0656	4.081												Amino acids, peptides, and analogues	C6H9NO2	-	Organic acids and derivatives	-
pos_10340	metab_10339	N-Acetyltryptophan	C13H14N2O3	HMDB0013713	2.7389	247.108	1.13665	1.08439	0.0021	0.0066	pos	4.5037	4.5446	4.1453	4.3041	4.5303	4.4951	4.923	4.5607	4.9882	4.713	4.7948	4.7754												Carbohydrates and carbohydrate conjugates	C11H19NO10	Monosaccharides	Organic oxygen compounds	C03410
pos_10354	metab_10353	Simmondsin	C16H25NO9	HMDB0030394	2.71602	414.119	1.44856	1.12272	0.0003999	0.002104	pos	4.2179	4.367	4.4339	4.1405	4.5062	4.6838	4.9129	5.019	4.8063	4.918	4.8244	5.1057												Fatty acids and conjugates	C7H12O4	-	Lipids and lipid-like molecules	-
pos_10364	metab_10363	Flavine mononucleotide (FMN)	C17H21N4O9P	-	2.69317	457.113	1.91068	1.20587	0.0001351	0.001123	pos	4.1712	4.7286	4.242	4.056	4.6855	4.4917	5.4945	5.0454	5.4057	5.3511	5.3044	5.2039												Short-chain keto acids and derivatives	C5H6O4	-	Organic acids and derivatives	C00433
pos_10436	metab_10435	Dihydroferuperine	C17H23NO3	HMDB0040700	2.5766	322.202	1.09732	1.0621	0.001292	0.004632	pos	5.3746	5.4406	5.1721	5.2062	5.3779	5.4112	5.7494	5.4075	5.8113	5.716	5.6296	5.6519												Not Available	C15H14O4	-	Phenylpropanoids and polyketides	C09980
pos_10438	metab_10437	4-Hydroxy-6-methyl-3-(1-oxobutyl)-2H-pyran-2-one	C10H12O4	HMDB0040637	2.5766	238.108	1.47125	1.13176	0.0002241	0.001471	pos	4.1879	4.4315	4.1233	4.1322	4.3775	4.4772	5.0901	4.6223	5.0067	4.7223	4.7364	4.9396												Amino acids, peptides, and analogues	C15H22N2O4	-	Organic acids and derivatives	-
pos_10446	metab_10445	L-Pyridosine	C12H18N2O4	HMDB0029443	2.56137	287.16	1.99073	2.60812	0.04128	0.06816	pos	0.0004	2.7422	0.4395	1.1818	0.5374	1.4511	3.397	0.6721	3.1329	1.267	4.0512	4.0544												Delta valerolactones	C11H18O4	-	Organoheterocyclic compounds	-
pos_10447	metab_10446	3-methyl-2-nitrophenyl acetate	C9H9NO4	-	2.56137	196.061	1.47527	1.13294	0.000265	0.001626	pos	4.5015	4.5607	4.2536	4.2354	4.4632	4.4327	4.9639	4.668	4.9636	4.9424	5.2097	5.2142												-	C14H24O4	-	-	-
pos_10467	metab_10466	6-Hydroxyetodolac	C17H21NO4	HMDB0060543	2.53855	286.144	1.34524	1.14151	0.007795	0.01759	pos	4.0694	4.4532	4.3456	3.7504	3.9988	4.1444	5.2115	4.5994	4.9465	4.214	4.6867	4.6077												Carbohydrates and carbohydrate conjugates	C15H26O13	-	Organic oxygen compounds	-
pos_10474	metab_10473	3-Methyldioxyindole	C9H9NO2	HMDB0004186	2.53093	164.071	1.20127	1.09146	0.004572	0.01171	pos	4.1487	4.1527	4.1507	4.0824	4.1649	4.1646	4.7214	4.2455	4.4638	4.7704	4.4506	4.4854												-	C20H36O5	-	-	-
pos_10478	metab_10477	N-Butylscopolamine metabolite	C12H21NO2	-	2.52333	212.165	1.46921	1.13406	8.11e-06	0.0004748	pos	3.7738	3.7357	3.6694	3.7213	3.8193	3.8824	4.3294	4.177	4.4545	4.2925	4.1601	4.2173												Hydroxycinnamic acids and derivatives	C20H20O7	-	Phenylpropanoids and polyketides	-
pos_10488	metab_10487	Reduced pyocyanine	C13H12N2O	-	2.507	213.103	1.02152	1.08456	0.046	0.07457	pos	4.738	5.2946	4.7069	4.6146	4.9706	4.9787	5.9016	4.8079	5.3855	5.1262	5.2897	5.2694												Quinone and hydroquinone lipids	C29H44O3	-	Lipids and lipid-like molecules	-
pos_10504	metab_10503	7-Hydroxy-2-methylisoflavone	C16H12O3	LMPK12050001;HMDB0033979	2.49182	253.086	1.9174	1.21409	4.998e-05	0.0007448	pos	4.0465	4.0582	4.1529	3.7173	4.3179	4.3112	5.0231	4.9396	5.1564	4.8709	4.9277	4.9589												Fatty acids and conjugates	C16H30O4	-	Lipids and lipid-like molecules	C08260;C19615
pos_10512	metab_10511	L-phenylalanyl-L-proline	C14H18N2O3	-	2.48425	263.139	1.08191	1.06601	0.003106	0.00877	pos	5.2052	5.1256	4.8436	4.9175	5.0916	5.0883	5.5427	5.1211	5.3871	5.5469	5.3233	5.3469												Purine deoxyribonucleotides	C10H13N4O7P	-	Nucleosides, nucleotides, and analogues	C06196
pos_10521	metab_10520	8-{(1s,5r)-4-Oxo-5-[(2z)-2-penten-1-yl]-2-cyclopenten-1-yl}octanoic acid	C18H28O3	-	2.46152	356.219	1.83412	1.27648	0.001753	0.005766	pos	3.6208	3.2357	2.6268	2.9425	3.4841	3.6845	4.0938	3.8209	4.47	4.3323	4.1059	4.1885												Glycerophosphoethanolamines	C39H76NO8P	-	Lipids and lipid-like molecules	-
pos_10559	metab_10558	Strobopinin	C16H14O4	LMPK12140187	2.41615	271.097	2.03103	1.28149	0.0001153	0.001047	pos	3.7606	3.5925	3.228	3.2161	3.7935	3.8931	4.69	4.3462	4.7521	4.5583	4.5824	4.6077												Carbohydrates and carbohydrate conjugates	C3H6O4	-	Organic oxygen compounds	C00258
pos_10568	metab_10567	6-hydroxy-2-hexynoic acid	C6H8O3	LMFA01050273	2.40862	129.055	1.36489	1.14951	0.02159	0.03975	pos	4.089	4.0583	3.8796	3.9822	4.0255	4.0415	4.3213	4.1019	5.415	4.4944	4.665	4.6801												Carboxylic acids	C6H12O4	-	Organic acids and derivatives	-
pos_10593	metab_10592	6-Imino-5-oxocyclohexa-1,3-dienecarboxylate	C7H5NO3	-	2.3783	152.034	1.23257	1.08076	0.0001673	0.001261	pos	4.7726	4.8123	4.6595	4.6526	4.8239	4.8072	5.2393	4.9554	5.3121	5.0853	5.1197	5.1202												Carbohydrates and carbohydrate conjugates	C17H25NO9S2	-	Organic oxygen compounds	-
pos_10605	metab_10604	2-Oxo-1,2-dihydroquinoline-4-carboxylate	C10H7NO3	-	2.36315	190.05	1.26354	1.07577	0.001195	0.004377	pos	5.8697	5.9548	5.5587	5.6275	5.9473	5.9605	6.4159	5.9831	6.4208	6.2511	6.2367	6.2593												Carbohydrates and carbohydrate conjugates	C5H11O7P	-	Organic oxygen compounds	C11437
pos_10635	metab_10634	Homostachydrine	C8H15NO2	-	2.32533	158.117	1.38669	1.13159	0.0004596	0.002295	pos	3.8056	3.7713	3.6853	3.9891	4.1208	3.8364	4.4066	4.0535	4.6187	4.3605	4.4277	4.3965												Amino acids, peptides, and analogues	C7H11NO2	-	Organic acids and derivatives	C08287
pos_10636	metab_10635	Flavin adenine dinucleotide (FAD)	C27H33N9O15P2	-	2.31825	786.166	1.93619	1.23733	0.0002229	0.001467	pos	3.8749	4.4878	3.6422	4.1003	4.356	4.29	5.5084	4.6726	5.2348	4.9881	5.1749	5.0476												Amino acids, peptides, and analogues	C10H18N2O5	-	Organic acids and derivatives	-
pos_10637	metab_10636	Tyrosyl-Proline	C14H18N2O4	HMDB0029113	2.31825	311.16	1.48523	1.15266	0.002437	0.007361	pos	4.5437	4.5997	3.8085	4.1961	4.3782	4.1001	5.1973	4.5829	5.2163	4.6941	4.9857	4.8614												Amino acids, peptides, and analogues	C7H10N2O4	-	Organic acids and derivatives	-
pos_10647	metab_10646	L-(-)-Phenylalanine	C9H11NO2	-	2.29712	207.113	1.63032	1.12676	0.00099	0.003839	pos	5.4348	5.6146	4.8932	5.252	5.5523	5.6289	6.2986	6.0843	6.0671	6.1446	5.9914	5.8924												Not Available	C10H12N4O6	-	Nucleosides, nucleotides, and analogues	C01762
pos_10677	metab_10676	Phenylalanylproline	C14H18N2O3	HMDB0011177	2.25593	295.165	1.09563	1.05794	0.002349	0.007166	pos	6.0352	6.1842	5.7731	5.8757	6.0832	6.0862	6.4697	6.1189	6.5399	6.3077	6.3432	6.3454												Amino acids, peptides, and analogues	C7H9NO4	-	Organic acids and derivatives	C03972
pos_10730	metab_10729	Methylthio 2-(propanoyloxy)propanoate	C7H12O3S	HMDB0040003	2.19603	218.085	1.78789	1.27515	0.00427	0.01113	pos	3.5501	3.1223	3.3032	2.4961	3.729	3.8411	4.0519	4.1925	4.0463	4.2351	4.5183	4.5127												Amino acids, peptides, and analogues	C12H20N2O7	-	Organic acids and derivatives	C15485
pos_10740	metab_10739	2,2-Dimethyloxirane	C4H8O	HMDB0034431	2.18842	73.0655	1.23038	1.09059	0.000183	0.00133	pos	4.2061	4.3061	4.1441	4.0487	4.2917	4.3043	4.7184	4.403	4.6884	4.6882	4.536	4.5585												Hydropyridines	C8H11NO3	-	Organoheterocyclic compounds	-
pos_10767	metab_10766	Nb-Acetyl-Nb-methyltryptamine	C13H16N2O	HMDB0029837	2.14915	280.141	2.33988	1.34365	7.393e-06	0.0004687	pos	3.9438	4.0773	3.4622	3.5732	4.1187	4.1003	5.5902	4.9188	5.3342	4.9645	5.216	5.2481												Terpene glycosides	C15H20O4	-	Lipids and lipid-like molecules	-
pos_10768	metab_10767	6-Dimethylaminopurine	C7H9N5	HMDB0000473	2.14915	164.093	1.95511	1.258	1.289e-05	0.0005183	pos	3.624	3.7377	3.3784	3.4704	3.6649	3.6807	4.8652	4.259	4.6175	4.3404	4.5275	4.5122												Amino acids, peptides, and analogues	C18H28N4O8	-	Organic acids and derivatives	-
pos_10777	metab_10776	Histidinyl-Threonine	C10H16N4O4	HMDB0028895	2.13385	221.104	1.52188	1.19324	0.00544	0.01334	pos	3.0796	3.6425	3.8656	2.942	3.4698	3.771	4.3849	4.1234	4.0387	4.0629	3.9127	4.2653												Carbohydrates and carbohydrate conjugates	C11H16O7	-	Organic oxygen compounds	-
pos_10818	metab_10817	Sapidolide A	C14H18O5	HMDB0041582	2.07932	284.15	2.06581	1.55203	0.02691	0.04756	pos	1.6635	4.0199	1.7864	1.5643	3.5692	3.8316	4.7009	3.0768	5.1273	3.9208	4.2146	4.4674												Hydroxycinnamic acids and derivatives	C9H8O6S	-	Phenylpropanoids and polyketides	-
pos_10846	metab_10845	2-Pyrimidin-2-yl-Propionic Acid	C7H8N2O2	-	2.05645	153.066	1.27281	1.09541	0.0003808	0.002046	pos	4.4214	4.6581	4.3895	4.318	4.5554	4.5756	5.1023	4.7595	5.1011	4.8069	4.8724	4.8432												Not Available	C15H14O3	-	Phenylpropanoids and polyketides	-
pos_10863	metab_10862	Quinic acid	C7H12O6	HMDB0003072	2.02587	210.099	2.241	1.36888	6.861e-05	0.0008457	pos	3.3208	3.7107	2.7012	3.3468	3.4744	3.5317	4.7227	4.6851	4.8175	4.2919	4.4833	4.4955												Pyridinecarboxylic acids and derivatives	C8H9NO2	-	Organoheterocyclic compounds	-
pos_10905	metab_10904	Alpha-Methyltryptamine (AMT)	C11H14N2	-	1.99432	175.123	1.35116	1.11109	0.0009295	0.003674	pos	4.5649	4.7146	4.1694	4.5357	4.6587	4.6845	5.2519	4.7367	5.1007	5.0383	5.1124	5.1284												Amino acids, peptides, and analogues	C9H16N2O5S	-	Organic acids and derivatives	-
pos_10910	metab_10909	Alpha-Rotunol	C15H22O2	HMDB0035869	1.98675	273.124	2.10998	1.30482	0.0001957	0.001381	pos	3.8154	3.9677	3.0976	3.6786	3.909	3.8353	5.5219	4.6004	4.9783	4.7645	4.6888	4.5478												Carbohydrates and carbohydrate conjugates	C18H24O11	-	Organic oxygen compounds	-
pos_10939	metab_10938	DL-Norleucine	C6H13NO2	-	1.96415	173.129	1.43769	1.08956	0.0001226	0.001073	pos	5.6905	5.7362	5.3665	5.6604	5.7604	5.7511	6.2381	6.1193	6.3521	6.2635	6.0604	5.9764												Carbonyl compounds	C7H9NO	-	Organic oxygen compounds	-
pos_10975	metab_10974	Gamma-L-Glutamyl-S-(2-carboxy-1-propyl)cysteinylglycine	C14H23N3O8S	HMDB0029394	1.9175	416.108	1.47864	1.16542	0.0178	0.03402	pos	3.5745	4.6445	3.6397	3.9022	4.5299	4.5904	4.7555	4.6629	4.6835	5.2197	4.7828	4.8966												Amino acids, peptides, and analogues	C6H8N2O4	-	Organic acids and derivatives	-
pos_11010	metab_11009	Hydroxyisonobilin	C20H26O6	HMDB0034475	1.87193	327.156	1.02323	1.05926	0.0007893	0.003279	pos	4.7955	4.9125	4.6958	4.8007	4.9391	4.9114	5.2757	4.9828	5.2301	5.029	5.1294	5.1319												Fatty alcohols	C8H16O2	-	Lipids and lipid-like molecules	-
pos_11054	metab_11053	8-Methoxykynurenate	C11H9NO4	HMDB0060426	1.78712	261.087	1.72393	1.19183	4.463e-05	0.0007138	pos	3.9838	3.6641	3.4633	3.7528	3.8725	3.5982	4.4075	4.322	4.3969	4.6296	4.3917	4.4688												Amino acids, peptides, and analogues	C12H11NO5	-	Organic acids and derivatives	-
pos_11066	metab_11065	Crotanecine	C8H13NO3	-	1.76427	172.097	1.04958	1.06002	0.000253	0.001581	pos	4.5257	4.6107	4.4901	4.4389	4.562	4.5616	4.905	4.6965	4.8504	4.9035	4.7508	4.7185												Amino acids, peptides, and analogues	C11H21N3O5	-	Organic acids and derivatives	-
pos_11109	metab_11108	3-Hydroxypropanal	C3H6O2	HMDB0003453	1.71745	75.0447	1.13999	1.07977	0.001678	0.005582	pos	4.4863	4.5389	4.1975	4.4142	4.5562	4.5831	4.9734	4.5763	4.8863	4.9415	4.7603	4.7743												Coumestans	C22H20O6	-	Phenylpropanoids and polyketides	-
pos_11130	metab_11129	3-Amino-2-piperidone	C5H10N2O	HMDB0000323	1.69465	115.087	1.11859	1.09541	0.006562	0.01541	pos	4.3067	4.1329	4.0389	3.942	4.3865	4.4092	4.787	4.3574	4.7524	4.3218	4.6348	4.7722												Benzoic acids and derivatives	C11H13NO5	-	Benzenoids	-
pos_11140	metab_11139	Hypusine	C10H23N3O3	HMDB0011140;LMFA01050514	1.67953	198.16	1.43007	1.21793	0.02157	0.03972	pos	2.7843	2.7973	2.6728	2.7323	2.8064	2.8068	3.8947	2.8558	3.3175	3.8755	3.3732	2.9047												Not Available	C21H30O9	-	Lipids and lipid-like molecules	-
pos_11168	metab_11167	Galactosyl 4-hydroxyproline	C11H19NO8	HMDB0029353	1.64225	276.108	1.24686	1.07776	0.0005699	0.002647	pos	4.9696	5.3948	5.1228	5.0414	5.2382	5.2515	5.693	5.4813	5.4992	5.7212	5.5192	5.5193												Gamma butyrolactones	C20H22O5	-	Organoheterocyclic compounds	-
pos_11244	metab_11243	Dimethyltryptamine	C12H16N2	HMDB0005973	1.51367	206.165	2.43613	1.54736	0.0006739	0.002952	pos	2.8772	2.6597	2.6112	2.5948	3.1833	2.6693	4.85	3.6858	5.0257	3.8467	4.4278	3.847												Fatty acids and conjugates	C18H20O3	-	Lipids and lipid-like molecules	-
pos_11271	metab_11270	5-Aminopentanal	C5H11NO	HMDB0012815	1.49083	244.202	1.67151	1.27207	0.00137	0.004829	pos	2.6627	3.0207	2.6533	2.6107	3.1239	3.3951	4.0533	3.173	3.6524	3.633	3.7767	3.932												Fatty acyl glycosides	C15H20O7	-	Lipids and lipid-like molecules	-
pos_11273	metab_11272	N-Acetylmannosamine	C8H15NO6	HMDB0001129	1.49083	186.076	1.15884	1.06848	0.0002529	0.001581	pos	4.8453	5.0791	4.8165	4.8347	5.0277	5.012	5.3233	5.1637	5.2722	5.3821	5.2373	5.2639												Carbohydrates and carbohydrate conjugates	C13H16O7	-	Organic oxygen compounds	-
pos_11301	metab_11300	N6-Isopentenyladenosine	C15H21N5O4	-	1.43737	336.166	2.79369	2.22436	0.005505	0.01347	pos	1.8461	1.7644	1.6422	1.7006	2.2116	1.7738	5.1764	4.8517	2.0011	3.2814	4.5069	4.515												Not Available	C12H14O4	-	Organoheterocyclic compounds	-
pos_11385	metab_11384	Aldosine	C12H18N2O4	HMDB0037817	1.23882	255.134	1.21777	1.10155	0.0005297	0.002522	pos	3.8431	4.0353	3.8429	3.712	3.9254	3.9209	4.4063	4.0379	4.4628	4.2409	4.2261	4.27												Piperazines	C25H32ClN5O3	-	Organoheterocyclic compounds	-
pos_11390	metab_11389	4-Pyridoxic acid	C8H9NO4	HMDB0000017	1.23122	184.061	1.04564	1.07607	0.01286	0.02617	pos	4.6182	4.9163	4.3632	4.4603	4.6636	4.6606	4.7968	4.7204	5.2801	5.1412	4.912	4.9408												Amino acids, peptides, and analogues	C10H20N4O4	-	Organic acids and derivatives	-
pos_11391	metab_11390	6-Lactoyltetrahydropterin	C9H13N5O3	HMDB0002065	1.22365	272.136	1.63103	1.13706	0.000807	0.003325	pos	4.7701	5.0194	4.4621	4.6968	5.0747	5.0902	5.5832	5.535	5.434	5.6296	5.4117	5.5084												Diphenylmethanes	C17H20O3	-	Benzenoids	-
pos_11429	metab_11428	Xi-2,3-Dihydro-2-oxo-1H-indole-3-acetic acid	C10H9NO3	HMDB0035514	1.1557	400.147	2.09741	1.35445	0.0001954	0.001381	pos	2.883	3.5463	2.7715	2.831	3.0782	3.544	4.6081	4.0376	4.091	4.5917	3.9084	4.0273												Not Available	C9H15NO2	-	Alkaloids and derivatives	-
pos_11458	metab_11457	Erinapyrone A	C7H10O3	HMDB0041426	1.11047	184.097	1.56575	1.1249	0.0001337	0.00112	pos	4.9678	5.1886	4.6005	4.8325	4.964	4.9403	5.7199	5.6576	5.5624	5.475	5.4271	5.3378												Tryptamines and derivatives	C18H24N2O7	-	Organoheterocyclic compounds	-
pos_11489	metab_11488	N-Acetyl-L-glutamate 5-semialdehyde	C7H11NO4	HMDB0006488	1.07285	138.055	1.29736	1.08087	3.436e-05	0.0006454	pos	5.0068	5.1519	4.9772	4.8801	5.131	5.1215	5.5379	5.3227	5.4828	5.5427	5.4085	5.4262												Phenoxazines	C12H8N2O2	-	Organoheterocyclic compounds	C02161
pos_11521	metab_11520	Alanyl-Proline	C8H14N2O3	HMDB0028695	1.01277	151.087	1.86164	1.19888	1.13e-05	0.0005085	pos	4.0041	4.269	3.8112	4.181	4.1927	4.2778	5.1909	5.0173	4.9493	5.0036	4.7413	4.7564												Amino acids, peptides, and analogues	C9H15NO3	-	Organic acids and derivatives	-
pos_11709	metab_11708	Piperidine	C5H11N	HMDB0034301	0.794517	86.097	1.10744	1.04463	0.0001881	0.001353	pos	6.9108	7.0612	6.8556	6.8664	7.0631	7.0505	7.4074	7.1585	7.3039	7.3097	7.2474	7.249												2-benzopyrans	C15H14O3	-	Organoheterocyclic compounds	-
pos_11730	metab_11729	2-Methyl-3-hydroxy-5-formylpyridine-4-carboxylate	C8H7NO4	HMDB0006954	0.78725	182.045	1.39131	1.09928	0.0002315	0.001495	pos	4.8246	4.7916	4.4465	4.6694	4.7563	4.7978	5.1954	5.1582	5.2316	5.2411	5.1414	5.1225												Cinnamylphenols	C16H14O4	-	Phenylpropanoids and polyketides	C15531
pos_11739	metab_11738	Guanidylic acid (guanosine monophosphate)	C10H14N5O8P	-	0.779817	364.066	1.09209	0.932201	0.04255	0.06984	pos	6.4913	6.2582	6.2869	6.4146	6.3546	6.3364	5.5166	5.7627	5.5508	6.5381	6.0932	6.0972												Amino acids, peptides, and analogues	C14H19NO3	-	Organic acids and derivatives	-
pos_11741	metab_11740	Cytidine monophosphate N-acetylneuraminic acid	C20H31N4O16P	HMDB0001176	0.779817	330.06	1.17409	0.92772	0.01445	0.02875	pos	6.4162	6.168	6.0531	6.5471	6.2956	6.2891	5.9352	5.5706	5.4062	6.2891	5.9149	5.9227												Fatty acids and conjugates	C18H22O2	-	Lipids and lipid-like molecules	-
pos_11774	metab_11773	GDP-L-fucose	C16H25N5O15P2	HMDB0001095	0.765	612.075	1.17778	0.883399	0.03877	0.06462	pos	5.1494	4.2845	4.8333	5.0141	4.7864	4.9535	4.4433	4.0694	3.6844	5.11	4.1158	4.2124												Flavonoid glycosides	C28H34O14	-	Phenylpropanoids and polyketides	-
pos_11809	metab_11808	4-AMINO-3- (5-CHLOROTHIEN-2-YL)BUTANOIC ACID	C8H10ClNO2S	-	0.7575	220.019	2.10706	1.46208	0.004723	0.01201	pos	2.5759	2.5889	2.4645	2.524	2.5981	2.5984	4.3011	2.6474	3.9458	4.2085	3.5448	3.7942												Diterpenoids	C19H22O5	-	Lipids and lipid-like molecules	-
pos_11871	metab_11870	Solerol	C6H10O4	HMDB0002173	0.735	164.092	1.01186	1.09307	0.02152	0.03965	pos	4.1588	4.1195	3.4804	3.7663	3.9734	3.9658	4.1028	4.2988	3.9506	4.4667	4.4207	4.4099												Fatty acids and conjugates	C12H22O4	-	Lipids and lipid-like molecules	C16308;C02678
pos_11880	metab_11879	3-Isopropylmalate	C7H12O5	HMDB0012156	0.727483	218.103	1.07169	1.07492	0.008528	0.01888	pos	4.345	4.4809	4.1975	4.2959	4.6401	4.7108	4.8614	4.666	4.9207	4.899	4.6485	4.6699												Alcohols and polyols	C14H22O2	-	Organic oxygen compounds	C16977
pos_12006	metab_12005	Isovalerylalanine	C8H15NO3	HMDB0000747	0.66145	174.113	1.07391	1.05707	0.0003896	0.002072	pos	5.2489	5.2965	5.2851	5.0849	5.327	5.2976	5.622	5.5599	5.7359	5.4573	5.4772	5.4881												Stilbene glycosides	C20H22O8	-	Phenylpropanoids and polyketides	-
pos_12015	metab_12014	Imidazolepropionic acid	C6H8N2O2	HMDB0002271	0.66145	123.056	1.56573	1.14101	0.0005187	0.002486	pos	4.4126	5.0267	4.8225	4.4774	4.7593	4.756	5.725	5.1978	5.0534	5.4338	5.4245	5.4045												Terpene lactones	C20H24O11	-	Lipids and lipid-like molecules	C07603
pos_12077	metab_12076	2-O-Methylcytosine	C5H7N3O	HMDB0004339	0.639067	126.066	1.12165	1.07201	0.001144	0.004249	pos	4.5941	4.8545	4.4537	4.5615	4.7091	4.7394	5.0211	4.8462	5.0427	5.0625	4.9733	4.9734												Hydroxycinnamic acids and derivatives	C14H20N4O2	-	Phenylpropanoids and polyketides	C04498
pos_12113	metab_12112	Acetylcholine	C7H15NO2	HMDB0000895	0.62445	146.118	1.05288	1.05534	0.005086	0.01269	pos	5.6946	6.0027	5.6682	5.6689	5.885	5.882	6.0443	5.9224	6.1681	6.4178	6.0757	6.0978												Amino acids, peptides, and analogues	C13H15NO5	-	Organic acids and derivatives	-
pos_12434	metab_12433	Mammeigin	C25H24O5	HMDB0030785;LMPK12100028	0.512683	427.152	1.21677	1.08529	0.004694	0.01195	pos	4.7961	5.2177	4.6711	4.9128	5.1796	5.1902	5.5858	5.2428	5.5306	5.3826	5.4071	5.3769												Amino acids, peptides, and analogues	C12H15NO5	-	Organic acids and derivatives	-
pos_12440	metab_12439	N-Isobutyrylglycine	C6H11NO3	-	0.505133	291.155	1.5838	1.22616	0.02258	0.0412	pos	2.7512	4.1246	3.953	2.9171	3.9356	4.1505	4.6275	4.0788	4.8398	4.4531	4.2857	4.4897												Fatty acyl glycosides	C18H30O8	-	Lipids and lipid-like molecules	-
neg_33	metab_12540	Polyethylene, oxidized	C12H20O5	HMDB0032472	3.76422	243.124	1.36223	1.07434	0.0002942	0.001742	neg	6.4291	6.5418	6.145	6.2566	6.5128	6.5355	6.9265	6.7066	7.076	6.9142	6.8258	6.8241												Monoterpenoids	C10H20O3	-	Lipids and lipid-like molecules	-
neg_35	metab_12542	Suberic acid	C8H14O4	HMDB0000893;LMFA01170001	4.08192	173.081	1.17558	1.0512	0.000109	0.001018	neg	6.7677	6.727	6.567	6.7037	6.8408	6.8242	7.1295	6.9318	7.2127	7.1171	7.0412	7.0683												Terpene lactones	C37H46O5	-	Lipids and lipid-like molecules	-
neg_125	metab_12632	N-Acetyl-L-glutamic acid	C7H11NO5	-	0.981833	188.056	1.00194	1.05035	0.002524	0.007557	neg	5.4879	5.5766	5.3632	5.4264	5.5812	5.5702	5.8291	5.5776	5.7161	5.9879	5.7774	5.7807												Fatty acid esters	C12H24NO5+	-	Lipids and lipid-like molecules	-
neg_135	metab_12642	Talaromycin A	C12H22O4	HMDB0030143	4.37798	275.151	1.48632	1.12732	0.001574	0.005324	neg	4.8308	4.6336	4.3874	4.6741	4.9428	4.9468	5.1053	5.1346	5.8287	5.386	5.2751	5.3019												Methoxyphenols	C17H26O4	-	Benzenoids	C10462
neg_160	metab_12667	2'-Deoxyuridine	C9H12N2O5	-	1.08438	227.068	1.85426	1.17602	6.818e-05	0.0008457	neg	5.1226	4.9969	4.4642	4.8574	5.033	5.0471	6.0824	5.4067	5.8652	5.7784	5.796	5.7879												Medium-chain hydroxy acids and derivatives	C11H20O3	-	Organic acids and derivatives	-
neg_173	metab_12680	Monic acid	C18H30O6	HMDB0061154	6.0505	323.187	1.1214	1.05107	0.0001102	0.001025	neg	6.1996	6.162	5.996	6.0892	6.2144	6.224	6.5085	6.3381	6.5993	6.4773	6.4225	6.4278												Steroidal glycosides	C14H15NO7	-	Lipids and lipid-like molecules	-
neg_178	metab_12685	1,11-Undecanedicarboxylic acid	C13H24O4	HMDB0002327	6.14197	243.16	1.32673	1.07364	0.0006969	0.003017	neg	6.4467	5.9825	6.2206	5.9887	6.2493	6.2653	6.553	6.6829	6.7956	6.5636	6.6432	6.6517												Pyranocoumarins	C15H16O6	-	Phenylpropanoids and polyketides	-
neg_180	metab_12687	Tetradecanedioic acid	C14H26O4	LMFA01170018;HMDB0000872	6.17253	257.176	1.54619	1.08543	1.328e-06	0.0003704	neg	6.6237	6.4456	6.4475	6.4064	6.5635	6.5586	6.9447	7.0422	7.2292	7.1251	7.0266	7.0173												-	C14H8O5	-	-	C10395
neg_240	metab_12747	()-4-Methylene-2-pyrrolidinecarboxylic acid	C6H9NO2	HMDB0029434	0.796283	172.061	1.13934	1.06537	8.876e-05	0.0009386	neg	4.7928	4.8583	4.8611	4.7367	4.9227	4.9246	5.1316	5.0502	5.1877	5.3339	5.1442	5.1481												Not Available	C13H12N2O4	-	Alkaloids and derivatives	-
neg_250	metab_12757	N-Glycolylneuraminic acid	C11H19NO10	HMDB0000833	0.788733	362.052	1.13727	0.937526	0.03065	0.05305	neg	7.2384	6.9976	7.032	7.1952	7.0906	7.0892	6.2946	6.4658	6.3259	7.2406	6.8291	6.825												Fatty alcohols	C9H18O2	-	Lipids and lipid-like molecules	-
neg_269	metab_12776	3-Methyladipic acid	C7H12O4	HMDB0000555	3.0225	159.066	1.2333	1.06134	9.015e-05	0.000944	neg	6.2272	6.2882	6.0919	6.1027	6.3314	6.3245	6.7092	6.4525	6.7396	6.5888	6.5841	6.5886												Quinoline carboxylic acids	C10H7NO4	-	Organoheterocyclic compounds	C02470
neg_844	metab_13351	Riboflavin (Vitamin B2)	C17H20N4O6	-	3.0146	375.132	2.33567	1.476	0.0001544	0.001205	neg	3.1318	3.4929	2.5525	2.7716	3.209	2.5927	5.1108	3.8516	4.6089	4.167	4.3063	4.1536												Monoterpenoids	C10H16O4	-	Lipids and lipid-like molecules	-
neg_1061	metab_13568	2,5-Dioxopentanoate	C5H6O4	HMDB0060365	0.796283	129.018	1.36205	1.08653	0.0004315	0.0022	neg	5.2633	5.4145	5.3094	5.3665	5.4489	5.4429	5.9899	6.0492	5.5815	5.8337	5.7924	5.7892												Steroid lactones	C29H44O11	-	Lipids and lipid-like molecules	-
neg_1104	metab_13611	Yangonin	C15H14O4	HMDB0034144	4.70777	239.072	1.32271	1.09634	3.226e-06	0.0003989	neg	4.2139	4.1997	4.2234	4.2195	4.3702	4.3721	4.7805	4.6442	4.7143	4.6282	4.6307	4.6641												Amino acids, peptides, and analogues	C22H36N4O13	-	Organic acids and derivatives	C05554
neg_1110	metab_13617	Tyrosyl-Isoleucine	C15H22N2O4	HMDB0029108	4.73107	331.109	1.29854	1.11457	0.001909	0.006156	neg	4.0131	4.2015	3.7636	3.9033	4.2635	4.3119	4.7385	4.4226	4.6406	4.4188	4.4617	4.5738												Benzoic acids and derivatives	C15H16O5	-	Benzenoids	-
neg_1133	metab_13640	Alpha-Carboxy-delta-decalactone	C11H18O4	HMDB0030985	4.86668	259.119	1.34695	1.10659	0.0001652	0.001253	neg	4.2152	4.0997	4.0771	4.09	4.2615	4.1943	4.5728	4.4185	4.8334	4.6716	4.5346	4.563												1-hydroxy-2-unsubstituted benzenoids	C11H14O2	-	Benzenoids	-
neg_1382	metab_13889	2,3-dinor Prostaglandin E1	C18H30O5	-	6.01995	325.203	1.27156	1.05816	1.729e-05	0.0005515	neg	6.6852	6.6528	6.5323	6.5973	6.7223	6.7318	7.0935	6.9208	7.1889	7.0559	6.9909	6.9981												Fatty acids and conjugates	C10H18O2	-	Lipids and lipid-like molecules	-
neg_1438	metab_13945	(6R,8Z)-6-Hydroxy-3-oxotetradecenoic acid	C14H24O4	HMDB0062363	6.14197	255.161	1.13085	1.05728	4.201e-05	0.0007	neg	5.5635	5.5131	5.3613	5.3945	5.5296	5.5296	5.8346	5.6719	5.875	5.8453	5.7685	5.7798												Indoles	C12H13NO2	-	Organoheterocyclic compounds	C11284
neg_1446	metab_13953	A-L-Arabinofuranosyl-(1->3)-b-D-xylopyranosyl-(1->4)-D-xylose	C15H26O13	HMDB0038865	6.15727	413.128	1.07266	1.05608	0.0003177	0.001827	neg	5.3043	5.2543	5.1058	5.2372	5.3947	5.3698	5.6447	5.6092	5.6678	5.4612	5.5319	5.5318												Eicosanoids	C20H36O7	Eicosanoids	Lipids and lipid-like molecules	C06475
neg_1460	metab_13967	13,14-dihydro Prostaglandin F1alpha	C20H38O5	-	6.19582	357.266	1.35757	1.08042	1.769e-06	0.0003878	neg	5.4436	5.3329	5.2582	5.3337	5.4285	5.4346	5.9253	5.6973	5.8162	5.8375	5.7777	5.771												Benzenesulfonamides	C10H11N3O4S	-	Benzenoids	-
neg_1461	metab_13968	13,14-dihydro-PGE1	C20H36O5	LMFA03010144	6.19582	355.25	1.28796	1.0702	2.017e-05	0.0005595	neg	5.746	5.7059	5.5456	5.6215	5.7828	5.7873	6.1944	5.9686	6.1809	6.1284	6.0578	6.0607												Not Available	C15H12O3	-	Organoheterocyclic compounds	-
neg_1472	metab_13979	Cyclokievitone hydrate	C20H20O7	HMDB0037750	6.23413	371.117	1.50177	1.20426	0.03174	0.05467	neg	4.3238	4.5495	3.0324	3.0919	4.2797	4.1025	4.9331	4.4737	4.1934	5.0347	4.7481	4.7743												Steroid lactones	C29H42O10	-	Lipids and lipid-like molecules	-
neg_1480	metab_13987	13'-Hydroxy-alpha-tocotrienol	C29H44O3	HMDB0012560	6.13433	477.287	1.31036	1.07993	0.0001203	0.001063	neg	5.4137	5.5096	5.2384	5.2012	5.4198	5.4975	5.8223	5.9054	5.8494	5.6897	5.7818	5.8134												Tetrahydrofuran lignans	C18H18O5	-	Lignans, neolignans and related compounds	-
neg_1487	metab_13994	Hexadecanedioic acid	C16H30O4	LMFA01170022;HMDB0000672	6.2803	285.208	1.05373	1.06541	0.01478	0.02927	neg	5.7755	5.8784	5.2282	5.4279	5.756	5.7783	6.2396	5.8619	6.0476	5.8546	6.0318	6.0254												Naphthoquinones	C22H16O6	-	Benzenoids	-
neg_1717	metab_14224	DIMP	C10H13N4O7P	HMDB0006555	0.781117	331.046	1.59443	1.12241	0.0004064	0.002123	neg	5.524	5.7106	5.3616	5.08	5.6523	5.6622	6.2692	5.7713	6.2385	6.3121	6.2258	6.2086												Amino acids, peptides, and analogues	C7H14N2O5S	-	Organic acids and derivatives	-
neg_1720	metab_14227	PE(16:1(9Z)/18:0)	C39H76NO8P	LMGP02010524;HMDB0008958	7.24697	754.466	1.70109	0.860465	0.00251	0.007532	neg	5.8249	6.3656	5.4865	5.9599	6.3885	6.3533	4.9531	5.2117	4.696	5.7459	5.3899	5.3065												Lineolic acids and derivatives	C19H34O5	-	Lipids and lipid-like molecules	-
neg_2482	metab_14989	Glyceric acid	C3H6O4	HMDB0000139	0.63565	105.018	1.28459	1.06704	8.186e-06	0.0004748	neg	5.7737	5.9801	5.9836	5.87	5.9555	5.9718	6.2355	6.4294	6.41	6.2739	6.2768	6.2887												Bile acids, alcohols and derivatives	C27H44O7	-	Lipids and lipid-like molecules	C02633
neg_2562	metab_15069	(2-Methoxyethoxy)propanoic acid	C6H12O4	HMDB0059705	0.6738	193.072	1.22257	1.0937	0.0009837	0.003823	neg	4.208	4.3199	3.886	4.1149	4.1976	4.3086	4.5806	4.4306	4.6358	4.5881	4.5761	4.5724												Phenylpiperidines	C13H15NO2	-	Organoheterocyclic compounds	C07489
neg_2670	metab_15177	Deoxyuridine monophosphate (dUMP)	C9H13N2O8P	-	0.742967	307.035	1.42863	1.09752	0.0005961	0.00273	neg	5.7133	5.4191	5.1847	5.4816	5.6591	5.6443	5.8411	5.8524	6.2535	6.2296	6.0735	6.0799												Lineolic acids and derivatives	C18H28O4	-	Lipids and lipid-like molecules	-
neg_2757	metab_15264	Guanosine 5'-monophosphate	C10H14N5O8P	-	0.788733	725.111	1.67015	0.811063	0.0408	0.06749	neg	5.6563	4.9839	5.2415	5.5151	5.36	5.3489	3.6113	3.5681	3.6094	5.8173	4.7046	4.7299												Carbonyl compounds	C11H18O2	-	Organic oxygen compounds	-
neg_2810	metab_15317	4-Phenylbutyl glucosinolate	C17H25NO9S2	HMDB0038415	0.81915	486.066	1.58294	0.859279	0.001914	0.006166	neg	4.6931	4.7634	4.8993	5.0889	4.9192	4.9257	3.7691	4.3041	3.87	4.6044	4.2643	4.3603												Fatty acids and conjugates	C14H26O3	-	Lipids and lipid-like molecules	-
neg_2864	metab_15371	Guanosine-3',5'-cyclic monophosphate	C10H12N5O7P	-	0.9119	366.023	1.58986	0.792587	0.02336	0.04239	neg	4.5354	3.7549	4.0627	4.482	4.1922	4.2294	2.9708	3.02	2.4973	4.439	3.6797	3.41												Not Available	C23H40O4	-	Lipids and lipid-like molecules	-
neg_2949	metab_15456	1-Deoxy-D-xylulose 5-phosphate	C5H11O7P	HMDB0001213	1.04567	195.006	1.4139	1.12596	0.001086	0.004091	neg	3.9694	4.1312	3.7278	3.9375	4.245	4.1874	4.5138	4.564	4.536	4.4826	4.565	4.5835												Fatty acids and conjugates	C22H42O2	Fatty acids	Lipids and lipid-like molecules	C08316
neg_3027	metab_15534	L-Hypoglycin A	C7H11NO2	HMDB0029427	1.19355	186.077	1.0837	1.07186	0.0004862	0.002386	neg	4.3289	4.448	4.2152	4.2065	4.3987	4.369	4.7603	4.4961	4.7869	4.6041	4.6031	4.5815												Glycerophosphoethanolamines	C35H68NO8P	-	Lipids and lipid-like molecules	-
neg_3059	metab_15566	Gamma-Glutamylvaline	C10H18N2O5	HMDB0011172	1.26415	245.115	1.36661	1.10818	0.002185	0.00681	neg	4.6691	4.8367	4.25	4.6451	4.8855	4.8903	5.004	5.2698	5.1131	5.4245	5.1991	5.216												Glycerophosphoethanolamines	C35H68NO8P	-	Lipids and lipid-like molecules	-
neg_3094	metab_15601	Pyroglutamylglycine	C7H10N2O4	HMDB0061890	1.35062	167.046	1.82088	1.24791	6.797e-05	0.0008457	neg	3.1935	3.5785	2.958	3.311	3.512	3.5106	4.3754	3.9885	4.3021	4.0001	4.1818	4.1898												Glycerophosphoethanolamines	C39H72NO8P	-	Lipids and lipid-like molecules	-
neg_3095	metab_15602	Xanthosine	C10H12N4O6	HMDB0000299	1.35062	283.069	1.09312	1.06681	0.00351	0.009618	neg	4.9788	5.1746	5.4176	4.9744	5.1846	5.1655	5.4036	5.2991	5.4852	5.7468	5.506	5.5165												Glycerophosphoserines	C40H74NO10P	-	Lipids and lipid-like molecules	-
neg_3138	metab_15645	Tetrahydrodipicolinate	C7H9NO4	HMDB0012289	1.46867	216.052	1.23844	1.09138	0.000144	0.001163	neg	4.2323	4.2298	4.226	4.1305	4.3925	4.3983	4.8408	4.4684	4.6973	4.6368	4.6621	4.6432												Glycerophosphoglycerols	C38H73O10P	-	Lipids and lipid-like molecules	-
neg_3159	metab_15666	2'-Deoxymugineic acid	C12H20N2O7	HMDB0033909	1.5161	653.255	2.37684	2.2763	0.03652	0.06144	neg	0.6369	1.4405	0.0227	0.026	3.9414	3.8573	3.9465	3.7045	3.6632	2.1454	4.567	4.5618												Glycosphingolipids	C36H69NO8	Glycolipids	Lipids and lipid-like molecules	C01190
neg_3230	metab_15737	6-Acetyl-2,3-dihydro-2-(hydroxymethyl)-4(1H)-pyridinone	C8H11NO3	HMDB0035178	1.65867	214.072	1.16431	1.08096	8.189e-05	0.0009112	neg	4.1583	4.1581	4.0327	4.0572	4.2006	4.2187	4.5664	4.3312	4.5992	4.4779	4.4231	4.4376												Glycerophosphoethanolamines	C36H72NO8P	-	Lipids and lipid-like molecules	-
neg_3241	metab_15748	Enokipodin C	C15H20O4	HMDB0040119	1.66665	285.11	1.23434	1.10464	0.0003097	0.001801	neg	3.7463	3.9498	3.6875	3.716	3.9363	3.8392	4.3544	3.9776	4.3513	4.181	4.199	4.2112												Glycerophosphoethanolamines	C37H72NO7P	-	Lipids and lipid-like molecules	-
neg_3533	metab_16040	Pyridinoline	C18H28N4O8	HMDB0000851	2.14528	473.191	2.34221	1.72906	0.001869	0.006053	neg	3.1319	1.5517	1.4465	1.504	2.7038	2.1933	3.9752	3.8188	3.832	2.8516	3.5296	3.6667												Glycerophosphoethanolamines	C35H70NO8P	-	Lipids and lipid-like molecules	-
neg_3634	metab_16141	3-Furanmethanol glucoside	C11H16O7	HMDB0032924	2.29603	305.088	1.58113	1.44391	0.02094	0.03878	neg	1.8919	1.9039	1.7968	1.8555	1.9185	1.9169	2.4408	1.9508	2.1791	3.0199	3.1942	3.5115												Glycerophosphoethanolamines	C37H72NO8P	-	Lipids and lipid-like molecules	-
neg_3757	metab_16264	(2E)-3-[3-(sulfooxy)phenyl]prop-2-enoic acid	C9H8O6S	HMDB0124975	2.51102	242.997	1.15696	1.09445	0.000458	0.002289	neg	3.8727	3.7923	3.4818	3.7302	3.7514	3.7311	4.1941	3.9836	4.1877	4.0245	4.0862	3.9959												Glycerophosphoethanolamines	C35H70NO8P	-	Lipids and lipid-like molecules	-
neg_3759	metab_16266	Citrubuntin	C15H14O3	HMDB0039146	2.51897	263.068	1.2739	1.10249	0.0008283	0.003383	neg	4.3471	4.4636	4.0559	4.161	4.3971	4.3903	4.869	4.4257	4.8671	4.8169	4.741	4.7427												Glycerophosphoethanolamines	C38H72NO8P	-	Lipids and lipid-like molecules	-
neg_3769	metab_16276	Alpha-Cyano-4-hydroxycinnamic acid	C10H7NO3	-	2.54298	188.035	1.16434	1.06223	6.502e-05	0.0008264	neg	5.5401	5.4031	5.2795	5.3356	5.4706	5.4619	5.7589	5.6264	5.869	5.7692	5.7441	5.7452												Triterpenoids	C30H44O2	-	Lipids and lipid-like molecules	-
neg_3780	metab_16287	Ethyl nicotinate	C8H9NO2	HMDB0059846	2.55895	132.045	1.17556	1.12542	0.01322	0.02677	neg	3.6402	3.6481	3.4152	3.0688	3.8409	3.8673	3.9154	4.1539	4.2796	3.7625	4.0503	4.0116												Fatty acids and conjugates	C26H50O2	-	Lipids and lipid-like molecules	C17278
neg_3808	metab_16315	Methionyl-Aspartate	C9H16N2O5S	HMDB0028969	2.61485	263.068	1.3335	1.11931	0.0005143	0.002472	neg	3.9912	4.0875	3.8569	3.6539	4.0789	4.0651	4.5538	4.1451	4.5541	4.4828	4.4118	4.4215												Fatty alcohols	C36H62O8	-	Lipids and lipid-like molecules	-
neg_3820	metab_16327	2-Hydroxybenzaldehyde O-[xylosyl-(1->6)-glucoside]	C18H24O11	HMDB0034157	2.6388	453.084	1.36921	1.15422	0.003023	0.008603	neg	3.324	3.9291	3.415	3.2082	3.7365	3.5893	4.4154	4.0791	4.1707	3.8465	3.9961	3.968												Carbonyl compounds	C25H48O2	-	Organic oxygen compounds	-
neg_3848	metab_16355	2-Propionylpyrrole	C7H9NO	HMDB0032492	2.71083	168.066	1.04873	1.0737	0.002079	0.006545	neg	3.9866	4.1025	4.0644	3.9349	4.0525	4.0361	4.4386	4.0656	4.442	4.3717	4.3157	4.3271												Amino acids, peptides, and analogues	C25H41NO3	-	Organic acids and derivatives	-
neg_3857	metab_16364	3-Methylglutaric acid	C6H10O4	-	2.73488	145.05	1.36308	1.08664	3.372e-05	0.0006454	neg	5.2406	5.2782	5.026	5.1563	5.3065	5.2973	5.7103	5.4874	5.7802	5.7801	5.6227	5.6327												Not Available	C21H28ClNO5	-	Organoheterocyclic compounds	-
neg_3880	metab_16387	L-alpha-Amino-5-oxo-2(5H)-isoxazolepropanoic acid	C6H8N2O4	HMDB0034322	2.77483	153.03	1.05353	1.08864	0.001572	0.005318	neg	3.5661	3.7042	3.4122	3.4403	3.6693	3.5989	3.9967	3.669	4.0444	3.8091	3.8904	3.8773												Diterpenoids	C20H34O5	-	Lipids and lipid-like molecules	-
neg_3886	metab_16393	Phenylacetylaspartic acid	C12H13NO5	-	2.78288	250.073	1.03895	1.06647	0.0001825	0.001327	neg	4.0315	4.1036	4.0257	3.9568	4.1881	4.1591	4.4694	4.38	4.292	4.3437	4.2837	4.3222												Glycerophosphoethanolamines	C21H42NO7P	-	Lipids and lipid-like molecules	-
neg_3920	metab_16427	(3R,5Z)-5-Octene-1,3-diol	C8H16O2	LMFA05000556;HMDB0030368	2.87107	189.113	1.21467	1.07276	9.254e-05	0.0009603	neg	5.1099	5.1266	4.9537	5.0081	5.1988	5.1982	5.5691	5.3514	5.6253	5.4119	5.4254	5.4359												-	C20H28O4	-	-	-
neg_3923	metab_16430	2-{[hydroxy(4-methoxy-1-benzofuran-5-yl)methylidene]amino}acetic acid	C12H11NO5	HMDB0129408	2.87107	294.063	1.83768	1.25648	0.0001184	0.001059	neg	3.4662	3.119	3.2831	2.9598	3.5444	3.5346	4.5786	3.858	4.2811	4.0928	4.1587	4.0456												Alcohols and polyols	C17H28O4	-	Organic oxygen compounds	-
neg_3956	metab_16463	Gamma-Glutamyllysine	C11H21N3O5	HMDB0029154	2.935	256.131	1.51714	1.20165	0.005113	0.01273	neg	3.1418	3.1227	2.7598	3.8349	3.3609	3.3879	4.1606	3.5889	3.8042	4.2967	3.866	3.8473												Not Available	C21H29NO8	-	Organoheterocyclic compounds	-
neg_3974	metab_16481	Desmethyldeschlorobenzoyl Indomethacin	C10H9NO3	-	2.98295	190.051	1.08691	1.08116	0.01124	0.02344	neg	4.6884	5.0008	4.4005	4.6418	4.8854	4.8453	5.4666	4.9121	5.3065	4.9565	5.1085	5.021												Amino acids, peptides, and analogues	C14H23NO11	-	Organic acids and derivatives	-
neg_3988	metab_16495	3-O-Methylglycyrol	C22H20O6	HMDB0033883	3.0225	361.105	1.59972	1.15738	2.65e-06	0.0003952	neg	3.8109	3.9662	3.7772	3.6831	3.963	3.9411	4.4758	4.4126	4.658	4.3985	4.3981	4.4433												Androstane steroids	C19H26O3	-	Lipids and lipid-like molecules	C05290
neg_4066	metab_16573	4-Quinolinecarboxylic acid	C10H7NO2	-	3.20632	218.046	1.03828	1.09235	0.0042	0.011	neg	3.2116	3.5398	3.4267	3.1829	3.5023	3.536	3.8604	3.5621	3.8289	3.7116	3.577	3.7411												Cumenes	C12H18O2	-	Benzenoids	-
neg_4109	metab_16616	2-{[(3,5-dimethoxyphenyl)(hydroxy)methylidene]amino}acetic acid	C11H13NO5	HMDB0131468	3.28617	260.055	1.45033	1.28151	0.01759	0.03372	neg	2.1979	2.21	2.1022	2.7027	2.2247	2.2231	3.1469	2.2571	2.9439	3.5983	2.5813	2.9826												Gamma butyrolactones	C13H22O4	-	Organoheterocyclic compounds	-
neg_4168	metab_16675	11,13-Dihydrotaraxinic acid glucosyl ester	C21H30O9	HMDB0035867	3.3731	471.19	2.10006	1.37219	0.004273	0.01113	neg	3.4983	3.5715	3.4055	2.9068	3.8378	3.8823	4.4099	4.1913	5.9709	4.1711	5.042	5.1724												Sesquiterpenoids	C15H28O3	-	Lipids and lipid-like molecules	-
neg_4208	metab_16715	Hydroxygaleon	C20H22O5	HMDB0031535	3.44492	363.121	1.4701	1.13643	1.975e-05	0.0005576	neg	3.8971	3.9498	3.6475	3.8614	3.9216	3.9404	4.4613	4.2871	4.6258	4.3116	4.3322	4.3708												Eicosanoids	C20H34O7	-	Lipids and lipid-like molecules	-
neg_4252	metab_16759	(S)-17-Hydroxy-9,11,13,15-octadecatetraynoic acid	C18H20O3	HMDB0038995	3.5329	305.115	1.32609	1.08737	1.71e-05	0.0005515	neg	4.8901	4.9051	4.7476	4.764	4.9721	4.9766	5.4378	5.193	5.3885	5.2735	5.2482	5.2702												Medium-chain keto acids and derivatives	C12H22O3	-	Organic acids and derivatives	C02367
neg_4278	metab_16785	3,4,5-trihydroxy-6-(3-phenylpropoxy)oxane-2-carboxylic acid	C15H20O7	HMDB0135312	3.58895	293.102	1.0196	1.07423	0.004451	0.01149	neg	4.2046	4.2987	3.9584	3.9178	4.2159	4.2211	4.5889	4.2419	4.3759	4.5759	4.4451	4.4317												Hydropyridines	C16H17NO4	-	Organoheterocyclic compounds	-
neg_4339	metab_16846	P-Cresol glucuronide	C13H16O7	HMDB0011686	3.70897	283.083	1.64286	1.27985	0.005632	0.01371	neg	3.4168	2.7888	2.4458	2.5051	3.1043	2.9759	3.1554	3.7238	3.2747	4.3168	3.7518	3.8385												Steroidal glycosides	C27H44O8	-	Lipids and lipid-like molecules	C03033
neg_4350	metab_16857	Dihydrodeoxy-8-epiaustdiol	C12H14O4	HMDB0031668	3.74083	267.088	1.37386	0.906122	2.128e-06	0.000393	neg	4.6735	4.6106	4.5448	4.7463	4.6859	4.6695	4.1878	4.2587	4.2159	4.1758	4.2311	4.2417												Carbazoles	C13H9NO2	-	Organoheterocyclic compounds	-
neg_4358	metab_16865	Hydroxynefazodone	C25H32ClN5O3	HMDB0061040	3.75647	466.2	1.14609	1.09449	0.008942	0.01957	neg	4.5032	4.1035	3.8794	4.0592	4.2723	4.3276	4.3605	4.4095	4.7737	4.8772	4.5487	4.5554												Carbonyl compounds	C33H38N4O8	-	Organic oxygen compounds	C16542
neg_4364	metab_16871	Asparaginyl-Lysine	C10H20N4O4	HMDB0028736	3.76422	295.117	1.21854	1.08661	0.001468	0.005074	neg	4.5596	4.7654	4.3786	4.3767	4.6702	4.7564	4.9789	4.8305	5.0911	5.062	4.9657	4.9551												Not Available	C37H40N2O6	-	Lignans, neolignans and related compounds	C09598
neg_4371	metab_16878	(S)-Verimol F	C17H20O3	HMDB0036558	3.772	317.14	1.38365	1.158	0.008993	0.01967	neg	3.9774	3.0711	3.1569	3.3985	3.4695	3.6974	4.0891	3.8966	4.1697	4.0759	3.9549	3.866												Carbohydrates and carbohydrate conjugates	C14H19NO6	-	Organic oxygen compounds	C03033
neg_4412	metab_16919	Homoarecoline	C9H15NO2	HMDB0038321	3.84333	214.109	1.50519	1.14942	7.447e-05	0.0008745	neg	3.727	3.7886	3.4367	3.5781	3.8418	3.8322	4.3447	4.0809	4.3313	4.3696	4.2178	4.1801												Hydroxycinnamic acids and derivatives	C17H15NO5	-	Phenylpropanoids and polyketides	-
neg_4431	metab_16938	N-(1-Deoxy-1-fructosyl)tryptophan	C18H24N2O7	HMDB0037847	3.87535	379.153	2.52262	1.85283	0.002535	0.007582	neg	1.9593	1.9714	1.8641	1.9228	1.986	2.6093	3.5032	5.0358	2.5888	3.443	4.1176	4.1247												Triterpenoids	C30H42O8	-	Lipids and lipid-like molecules	-
neg_4462	metab_16969	Questiomycin A	C12H8N2O2	HMDB0030483	3.96345	247.029	1.49882	1.18944	0.001148	0.004258	neg	3.4375	3.4552	3.132	3.3492	3.1831	2.7656	4.0465	3.6066	3.7566	4.0846	3.746	3.7387												Neoflavones	C16H12O5	-	Phenylpropanoids and polyketides	C10504
neg_4475	metab_16982	2-Hepteneoylglycine	C9H15NO3	HMDB0094728	3.98743	184.098	1.13809	1.12317	0.02297	0.04179	neg	3.2077	3.3175	3.032	3.8087	3.5995	3.4923	3.6256	3.6128	3.8436	4.3259	3.7618	3.8089												O-methylated flavonoids	C21H22O8	-	Phenylpropanoids and polyketides	C09789;C10112
neg_4540	metab_17047	1-Phenyl-6,7-dihydroxy-isochroman	C15H14O3	HMDB0029302	4.09742	287.093	1.14157	1.06984	0.0005897	0.002707	neg	4.9176	4.7053	4.5367	4.7005	4.7653	4.7275	5.1476	5.0716	5.0112	5.0605	5.0086	5.0284												Fatty acids and conjugates	C13H23NO4S2	-	Lipids and lipid-like molecules	C06157
neg_4556	metab_17063	3-(4-Hydroxyphenyl)-1-(4-hydroxy-2-methoxyphenyl)-2-propen-1-one	C16H14O4	HMDB0037319	4.12913	315.089	1.11414	1.07219	0.0001991	0.001396	neg	4.3523	4.3785	4.1122	4.2737	4.3708	4.3594	4.7118	4.5252	4.6385	4.6422	4.6052	4.5926												Carbohydrates and carbohydrate conjugates	C19H30O10	-	Organic oxygen compounds	-
neg_4613	metab_17120	9-(2,3-dihydroxypropoxy)-9-oxononanoic acid	C12H22O6	-	4.25002	261.135	1.32945	1.09049	0.0008592	0.003474	neg	5.0857	5.0199	4.8229	5.0407	5.1116	5.0895	5.3903	5.2981	5.8183	5.5733	5.3951	5.4252												Coumestans	C21H18O6	-	Phenylpropanoids and polyketides	C16968
neg_4713	metab_17220	Fallacinol	C16H12O6	-	4.42598	299.057	1.41621	1.15098	0.001033	0.003953	neg	3.5422	3.5975	3.2629	3.5414	3.8024	3.6747	4.5468	4.0106	4.0638	4.0269	4.0831	3.9258												Pregnane steroids	C22H29FO4	-	Lipids and lipid-like molecules	-
neg_4733	metab_17240	2-Pentanamido-3-phenylpropanoic acid	C14H19NO3	HMDB0094646	4.46607	294.136	1.17958	1.09476	0.0006339	0.002842	neg	3.9405	4.2081	4.0128	4.0165	4.1613	4.1675	4.68	4.3542	4.4666	4.2519	4.529	4.5424												Gamma butyrolactones	C15H22O5	-	Organoheterocyclic compounds	-
neg_4788	metab_17295	15-Octadecene-9,11,13-triynoic acid	C18H22O2	LMFA01030559;HMDB0032673	4.56085	307.113	1.87851	1.36216	0.0002156	0.001446	neg	2.3624	3.0135	2.2665	2.3257	2.6422	2.8622	3.7792	3.5119	3.6291	3.0765	3.429	3.6552												Sesquiterpenoids	C13H18O3	-	Lipids and lipid-like molecules	C04223;C02533
neg_4874	metab_17381	Didymin	C28H34O14	LMPK12140337;HMDB0029482	4.70777	629.168	2.38175	1.38094	2.065e-05	0.0005663	neg	3.5951	3.2808	3.1723	3.2317	3.8458	3.8404	4.9984	4.5758	4.9207	4.9421	4.7603	4.7553												Monoradylglycerols	C17H32O4	-	Lipids and lipid-like molecules	-
neg_4894	metab_17401	Gibberellin A95	C19H22O5	HMDB0041350	4.73897	375.146	1.08621	1.06765	0.0003561	0.001964	neg	4.5123	4.5287	4.3554	4.6295	4.5746	4.6294	4.9212	5.0116	4.782	4.7691	4.7875	4.7983												Steroid acids	C15H20O5	-	Lipids and lipid-like molecules	-
neg_4902	metab_17409	Dodecanedioic acid	C12H22O4	HMDB0000623;LMFA01170009	4.76288	275.151	1.2113	1.07325	3.391e-05	0.0006454	neg	4.8175	4.7612	4.6411	4.7661	4.8746	4.8904	5.194	5.0621	5.2091	5.1571	5.0981	5.1369												Amino acids, peptides, and analogues	C11H19NO3	-	Organic acids and derivatives	-
neg_4963	metab_17470	Isokobusone	C14H22O2	HMDB0036791	4.87465	259.11	1.80244	1.46067	0.0329	0.05632	neg	1.8244	3.4791	1.3943	1.6114	3.3259	3.2417	4.1735	3.2362	3.1999	3.6384	3.6503	3.8298												Benzoic acids and derivatives	C9H9NO4	-	Benzenoids	C07588
neg_4974	metab_17481	3,4,5-trihydroxy-6-(2-hydroxy-1,2-diphenylethoxy)oxane-2-carboxylic acid	C20H22O8	HMDB0135201	4.89018	389.125	1.5117	1.11225	5.678e-07	0.0003613	neg	4.5875	4.6866	4.6081	4.724	4.7619	4.8027	5.3518	5.2176	5.2265	5.2377	5.1265	5.1695												Not Available	C19H21NO3	-	Organoheterocyclic compounds	-
neg_4983	metab_17490	Ginkgolide C	C20H24O11	LMPR0104540003;HMDB0036860	4.90548	421.114	1.22974	1.08781	0.000356	0.001964	neg	4.3058	4.4262	4.1931	4.2733	4.4879	4.551	4.8509	4.8992	4.7354	4.7309	4.6037	4.7245												Methoxyphenols	C11H16O3	-	Benzenoids	-
neg_5006	metab_17513	4-Hydroxycinnamoylagmatine	C14H20N4O2	HMDB0033460	4.94355	257.14	1.33647	1.1218	0.00213	0.006673	neg	3.989	4.061	3.5628	3.9575	4.2278	4.1407	4.6154	4.2872	4.6331	4.4858	4.3799	4.4528												Pyrimidine ribonucleotides	C16H20N2O7	-	Nucleosides, nucleotides, and analogues	-
neg_5142	metab_17649	2-(2-Phenylacetoxy)propionylglycine	C13H15NO5	HMDB0059732	5.11323	264.089	2.03231	1.33905	0.0001048	0.001005	neg	3.0967	3.1243	2.706	2.8501	3.4133	3.3561	4.6468	3.8048	4.3237	3.8928	4.1143	4.0525												Fatty acids and conjugates	C11H16O4	-	Lipids and lipid-like molecules	-
neg_5166	metab_17673	N-Acetylvanilalanine	C12H15NO5	HMDB0011716	5.15303	234.077	1.34046	1.13728	0.0008269	0.00338	neg	3.4619	3.6474	3.5698	3.3263	3.7328	3.7665	4.4431	3.9106	3.9919	3.9659	4.0782	4.0637												Tetrahydrofuran lignans	C20H24O7	-	Lignans, neolignans and related compounds	-
neg_5170	metab_17677	6-Epi-7-isocucurbic acid glucoside	C18H30O8	HMDB0029782	5.16067	395.172	1.35281	1.08456	0.0003705	0.002008	neg	5.6589	5.739	5.3572	5.4521	5.7314	5.7643	6.2069	5.8758	6.2347	6.1169	6.0384	6.0815												Amino acids, peptides, and analogues	C7H13N3O4	-	Organic acids and derivatives	-
neg_5211	metab_17718	(1R,2R,4R,8R)-p-Menthane-2,8,9-triol	C10H20O3	HMDB0033574	5.2368	169.123	1.62829	1.16543	1.275e-05	0.0005183	neg	3.7284	3.8274	3.7398	3.665	3.8021	3.8316	4.5584	4.26	4.5552	4.332	4.3044	4.3219												Hydroxysteroids	C21H29FO5	-	Lipids and lipid-like molecules	C07004
neg_5219	metab_17726	Pyrrhoxanthinol	C37H46O5	HMDB0035696	5.26097	607.28	1.75827	1.18734	0.0001025	0.0009983	neg	4.2008	4.0357	3.7252	3.7652	4.2165	4.1411	4.819	4.6812	4.9657	4.7136	4.7117	4.7066												Steroid lactones	C30H40O9	-	Lipids and lipid-like molecules	-
neg_5226	metab_17733	3-Hydroxyisovalerylcarnitine	C12H24NO5+	HMDB0061189;LMFA07070041	5.27017	297.134	1.51502	1.14808	9.223e-05	0.0009579	neg	3.7777	3.7198	3.5798	3.6622	3.7803	3.8039	4.342	4.0535	4.5069	4.3532	4.2005	4.1782												Gamma butyrolactones	C19H22O6	-	Organoheterocyclic compounds	C09059
neg_5228	metab_17735	Gingerol	C17H26O4	HMDB0005783	5.27017	339.182	1.20173	1.07915	0.0001256	0.001085	neg	4.4757	4.4133	4.3506	4.4122	4.5062	4.5219	4.8166	4.6773	4.9947	4.8142	4.735	4.7564												Terpene lactones	C15H20O5	-	Lipids and lipid-like molecules	-
neg_5240	metab_17747	(S)-9-Hydroxy-10-undecenoic acid	C11H20O3	LMFA01050436;HMDB0032662	5.2862	245.14	1.3886	1.08324	0.0002349	0.001508	neg	5.6377	5.6036	5.5042	5.7261	5.6568	5.673	6.0098	5.9963	6.3842	6.1809	6.0136	6.0306												Linear diarylheptanoids	C25H30O8	-	Phenylpropanoids and polyketides	-
neg_5243	metab_17750	Indoxyl glucuronide	C14H15NO7	HMDB0010319	5.2862	344.057	1.17277	1.11095	0.004085	0.01076	neg	3.5929	3.2963	3.3398	3.7424	3.6629	3.6725	3.7184	3.9044	4.2739	3.9658	3.9091	3.9013												Fatty acids and conjugates	C10H18O4	-	Lipids and lipid-like molecules	C08277
neg_5262	metab_17769	Trans-Grandmarin	C15H16O6	HMDB0039030	5.31863	583.185	1.08373	1.08063	0.009702	0.02085	neg	4.3086	4.181	3.8223	4.3943	4.2347	4.3594	4.6054	4.5878	4.5353	4.4988	4.5462	4.5694												Terpene lactones	C17H24O6	-	Lipids and lipid-like molecules	-
neg_5270	metab_17777	Purpurin	C14H8O5	LMPK12140007	5.33495	255.031	1.43158	1.22148	0.02521	0.04507	neg	3.6776	3.3858	2.124	3.2846	3.3059	2.9936	3.6987	3.6338	4.3057	3.8978	3.9448	3.454												Tetracarboxylic acids and derivatives	C31H40O11	-	Organic acids and derivatives	-
neg_5281	metab_17788	1,2,3,4-Tetrahydro-b-carboline-1,3-dicarboxylic acid	C13H12N2O4	HMDB0032102	5.35935	259.073	1.84903	1.26554	0.000112	0.001035	neg	3.2225	3.5192	2.8793	3.0322	3.4804	3.4549	4.4462	3.8027	4.1434	4.1282	4.1725	4.0964												Carbonyl compounds	C12H16O2	-	Organic oxygen compounds	-
neg_5284	metab_17791	1-Hydroxy-3-nonanone	C9H18O2	HMDB0037143;LMFA05000601	5.36745	203.129	1.31786	1.11826	0.001836	0.005973	neg	3.9515	3.8837	3.7387	3.9064	3.7694	3.7871	4.1608	4.0304	4.5224	4.5538	4.2378	4.2507												Amino acids, peptides, and analogues	C13H14N2O4	-	Organic acids and derivatives	-
neg_5318	metab_17825	Xanthurenic acid	C10H7NO4	HMDB0000881	5.43235	204.03	1.10105	1.08298	0.007154	0.01643	neg	4.2146	4.4034	3.846	4.07	4.3096	4.3191	4.6618	4.5157	4.5964	4.5233	4.4636	4.4916												Fatty acid esters	C9H18O2	-	Lipids and lipid-like molecules	-
neg_5358	metab_17865	(1R,2R,3S,1'R)-Nepetalinic acid	C10H16O4	HMDB0034971	5.53678	245.103	1.52445	1.17353	0.0002852	0.001706	neg	3.3428	3.2993	3.2284	3.1927	3.2585	3.3504	3.9022	3.512	4.0265	3.9636	3.8206	3.8608												Methoxyphenols	C16H14O5	-	Benzenoids	C10274
neg_5369	metab_17876	Canesceol	C29H44O11	HMDB0034084	5.55228	589.269	1.3376	1.1002	0.0006396	0.002856	neg	4.704	4.7089	4.4069	4.358	4.7376	4.7481	5.187	4.9972	5.1745	4.9919	5.0434	5.0463												Fatty acids and conjugates	C14H26O5	-	Lipids and lipid-like molecules	-
neg_5386	metab_17893	Aerobactin	C22H36N4O13	HMDB0004051	5.55997	599.2	1.04029	1.05687	0.001357	0.004796	neg	4.5857	4.8188	4.7492	4.7858	4.8588	4.8968	5.0668	5.0713	5.0269	5.0833	5.0195	5.0618												Gamma butyrolactones	C10H16O4	-	Organoheterocyclic compounds	-
neg_5434	metab_17941	Ascochitine	C15H16O5	HMDB0030145	5.6556	311.069	1.29649	1.25408	0.04528	0.07359	neg	3.2459	2.5558	2.2028	2.8755	3.0393	2.9878	3.0302	3.0386	3.1633	3.2694	4.3542	4.347												Eicosanoids	C20H30O7	-	Lipids and lipid-like molecules	-
neg_5436	metab_17943	1-(4-hydroxyphenyl)pentan-3-one	C11H14O2	HMDB0132981	5.66362	223.098	1.02739	1.0872	0.002416	0.007318	neg	3.1838	3.1411	3.1371	3.2016	3.1881	3.2765	3.4633	3.2334	3.5939	3.5914	3.4399	3.4742												Fatty acids and conjugates	C5H8O2	-	Lipids and lipid-like molecules	-
neg_5500	metab_18007	Trans-Dec-2-enoic acid	C10H18O2	HMDB0010726	5.76982	215.129	1.39383	1.10342	0.0001107	0.001027	neg	4.686	4.621	4.436	4.536	4.7382	4.7162	5.1597	4.8746	5.1989	5.2822	5.0235	5.0584												Gamma butyrolactones	C17H22O5	-	Organoheterocyclic compounds	-
neg_5536	metab_18043	3-Indolebutyric acid	C12H13NO2	HMDB0002096	5.80963	238.064	1.73079	1.26184	0.0007723	0.003239	neg	2.945	2.616	3.2512	2.9544	3.3076	3.1687	4.3231	3.6389	4.1216	3.5455	3.6593	3.7252												Furanocoumarins	C16H14O4	-	Phenylpropanoids and polyketides	C09269
neg_5569	metab_18076	5,6-Dihydroxyprostaglandin F1a	C20H36O7	HMDB0012109	5.82523	387.24	1.48317	1.11352	1.95e-05	0.0005576	neg	4.7814	4.6826	4.5207	4.6058	4.825	4.8082	5.3225	5.0705	5.4266	5.2148	5.1904	5.2023												Carboxylic acid derivatives	C9H16O3	-	Organic acids and derivatives	-
neg_5643	metab_18150	Sulfamethoxazole N4-hydroxylamine	C10H11N3O4S	HMDB0013852	5.88805	314.044	1.19614	0.930906	3.1e-05	0.0006328	neg	4.8306	4.8046	4.8233	4.9106	4.8504	4.784	4.4465	4.5679	4.4565	4.3921	4.6119	4.5243												Monoterpenoids	C14H26O4	-	Lipids and lipid-like molecules	-
neg_5657	metab_18164	Lettucenin A	C15H12O3	HMDB0036738	5.90357	277.028	1.63146	1.25171	0.008989	0.01966	neg	3.5517	3.3628	2.2562	3.3126	3.0215	2.8964	3.8785	3.8676	3.8682	3.81	3.9081	3.7039												-	C20H28O3	-	-	C14717
neg_5678	metab_18185	Desglucocheirotoxin	C29H42O10	HMDB0034362	5.91913	571.256	1.37293	1.10879	0.000636	0.002847	neg	4.7396	4.6534	4.389	4.4478	4.7117	4.686	5.1972	4.7691	5.3621	5.1299	5.0869	5.0897												Homoisoflavans	C17H16O6	-	Phenylpropanoids and polyketides	-
neg_5692	metab_18199	6-Hydroxyenterolactone	C18H18O5	HMDB0041700	5.93483	313.109	1.13997	1.06335	0.00318	0.008913	neg	5.6252	5.5287	5.3695	5.513	5.6698	5.6316	5.9404	5.7523	5.7781	6.2464	5.8582	5.8731												Alcohols and polyols	C8H14O3	-	Organic oxygen compounds	-
neg_5724	metab_18231	Naphthoherniarin	C22H16O6	HMDB0039025	5.95818	411.065	1.85748	1.21972	2.749e-06	0.0003952	neg	3.9538	3.7288	3.6152	3.6767	3.7337	3.6316	4.8299	4.5894	4.3943	4.4945	4.5298	4.4072												Not Available	C12H13NO4	-	Organoheterocyclic compounds	-
neg_5761	metab_18268	Cystathionine sulfoxide	C7H14N2O5S	HMDB0002399	5.98925	275.013	1.24928	1.10786	0.001834	0.005966	neg	4.2866	4.1559	3.8965	4.1933	3.8561	3.8112	4.5958	4.635	4.3777	4.4106	4.4647	4.327												Diterpenoids	C32H44O14	-	Lipids and lipid-like molecules	-
neg_5788	metab_18295	13-Hydroxy-9-methoxy-10-oxo-11-octadecenoic acid	C19H34O5	HMDB0040901	6.00465	387.24	1.27588	1.07578	0.000202	0.001402	neg	5.5343	5.4258	5.2011	5.3968	5.5135	5.5513	5.9099	5.6541	5.9873	5.9263	5.8019	5.8151												Terpene glycosides	C25H34O12	-	Lipids and lipid-like molecules	-
neg_5800	metab_18307	Glycerophospho-N-Palmitoyl Ethanolamine	C21H44NO7P	-	6.01227	452.28	1.40909	1.11516	0.005117	0.01274	neg	5.2445	5.0546	4.8479	5.0669	5.0725	5.3469	5.6549	6.2403	5.4217	5.4255	5.4977	5.9212												Monoterpenoids	C10H16O2	-	Lipids and lipid-like molecules	-
neg_5835	metab_18342	Crustecdysone	C27H44O7	HMDB0030180	6.0352	479.303	1.45111	1.09715	7.38e-05	0.0008711	neg	5.1346	5.0587	4.9004	5.024	5.1973	5.1943	5.623	5.5987	5.5446	5.5853	5.5579	5.5621												Sesquiterpenoids	C15H24O5	-	Lipids and lipid-like molecules	-
neg_5843	metab_18350	Glutethimide	C13H15NO2	HMDB0015505	6.04285	262.109	2.0552	1.39112	0.001073	0.004057	neg	2.7257	2.8858	2.6274	2.7691	3.1328	2.749	4.6828	3.3474	4.0973	3.6816	3.8831	3.8044												Phenylnaphthalenes	C19H14O3	-	Benzenoids	-
neg_5868	metab_18375	Corchorifatty acid D	C18H28O4	HMDB0033243	6.05817	307.192	1.22471	1.05762	1.315e-05	0.0005236	neg	6.2331	6.2113	6.1155	6.1509	6.2798	6.2882	6.5987	6.4547	6.7032	6.5984	6.5296	6.5444												Quinolones and derivatives	C20H23NO3	-	Organoheterocyclic compounds	-
neg_5951	metab_18458	Tsibulin 2	C11H18O2	HMDB0037388	6.119	163.112	1.37454	1.17724	0.001602	0.005392	neg	2.9028	2.917	3.0374	2.4813	3.0726	3.0894	3.4255	3.1223	3.4838	3.6867	3.4354	3.4484												Amino acids, peptides, and analogues	C16H19N3O5	-	Organic acids and derivatives	-
neg_5973	metab_18480	3-Oxotetradecanoic acid	C14H26O3	HMDB0010730	6.13433	287.187	1.74541	1.1383	1.29e-05	0.0005183	neg	5.2388	5.2699	4.9834	5.2018	5.1697	5.1983	5.6582	6.0739	5.8935	6.0845	5.8137	5.8365												Fatty acids and conjugates	C7H12O4	-	Lipids and lipid-like molecules	-
neg_5986	metab_18493	MG(0:0/20:3(8Z,11Z,14Z)/0:0)	C23H40O4	HMDB0011547	6.14197	425.292	1.197	1.07357	0.0001948	0.001381	neg	4.9123	4.898	4.6559	4.7294	4.9168	4.9235	5.2239	5.1417	5.3105	5.1919	5.1344	5.1672												Methoxyphenols	C8H11NO2	-	Benzenoids	C16666
neg_6397	metab_18904	Erucic acid	C22H42O2	HMDB0002068	6.55465	383.318	1.14956	0.950023	0.0002288	0.001488	neg	6.5588	6.5548	6.4455	6.5591	6.643	6.6196	6.2858	6.2997	6.0395	6.1699	6.3363	6.2806												Substituted pyrroles	C25H27N3O6	-	Organoheterocyclic compounds	-
neg_6810	metab_19317	PE-NMe2(14:0/14:1(9Z))	C35H68NO8P	HMDB0113839	7.1856	642.452	1.68878	0.824936	0.007543	0.01716	neg	4.4797	5.5965	4.8345	4.5441	5.469	5.443	3.6848	4.2591	3.6829	4.6682	4.4011	4.354												Fatty alcohols	C7H12O	-	Lipids and lipid-like molecules	-
neg_6826	metab_19333	PE(14:0/16:1(9Z))	C35H68NO8P	HMDB0008825;LMGP02011249	7.21633	660.463	1.2516	0.910745	0.01476	0.02926	neg	5.5191	6.2486	5.6186	5.6895	6.0999	6.1165	4.7799	5.5743	5.2667	5.6347	5.4648	5.421												Not Available	C9H17NO	-	Organoheterocyclic compounds	C06184
neg_6853	metab_19360	PE(16:0/18:3(6Z,9Z,12Z))	C39H72NO8P	LMGP02011224;HMDB0008929	7.27092	712.495	1.34937	0.894578	0.01286	0.02618	neg	5.2765	5.31	5.7997	6.182	5.6894	5.6086	4.385	5.391	5.1606	5.0105	5.1617	5.1825												Amino acids, peptides, and analogues	C6H7NO4	-	Organic acids and derivatives	C02220
neg_6854	metab_19361	PS(16:0/18:2(9Z,12Z))	C40H74NO10P	LMGP03010976;HMDB0012358	7.27092	780.482	1.49409	0.854779	0.01787	0.03412	neg	4.8227	4.6286	5.2816	5.7566	5.1703	5.1638	3.4906	4.9493	4.5972	4.1882	4.484	4.6358												Carbohydrates and carbohydrate conjugates	C14H16O8	-	Organic oxygen compounds	-
neg_6908	metab_19415	PG(16:0/16:1(9Z))	C38H73O10P	LMGP04010910;HMDB0010571	7.40132	755.462	2.19796	0.701705	0.01164	0.02412	neg	4.5478	5.3749	4.4818	4.6287	5.4499	5.4268	2.6419	2.5988	2.64	4.7164	4.3443	4.0451												Not Available	C14H12O6S	-	Phenylpropanoids and polyketides	-
neg_6935	metab_19442	Glucosylceramide (d18:1/12:0)	C36H69NO8	HMDB0004969	7.478	688.494	1.53592	0.880034	0.007439	0.01697	neg	5.6253	5.8265	6.1608	5.9295	6.0216	6.0481	4.4238	5.696	5.2696	5.42	5.2807	5.2491												Gamma butyrolactones	C15H16O5	-	Organoheterocyclic compounds	C09489
neg_6965	metab_19472	PE(15:0/16:0)	C36H72NO8P	HMDB0008890;LMGP02011236	7.57002	676.494	1.18602	0.922453	0.01395	0.02797	neg	5.9749	5.8408	6.6505	6.3746	6.1343	6.0077	5.3085	6.071	5.804	5.7007	5.5632	5.6663												Fatty acyl glycosides	C19H24O9	-	Lipids and lipid-like molecules	-
neg_7824	metab_20324	PE(16:1(9Z)/P-16:0)	C37H72NO7P	HMDB0008982	7.70823	672.5	2.08088	0.816645	0.0002788	0.001682	neg	5.8778	6.1444	5.8868	6.006	6.3661	6.2697	4.5457	5.024	4.5705	5.5738	5.1004	5.0376												Indolecarboxylic acids and derivatives	C9H7NO5S	-	Organoheterocyclic compounds	-
neg_7934	metab_20434	PE-NMe(15:0/14:0)	C35H70NO8P	HMDB0113017	7.41665	662.479	1.26428	0.903383	0.03568	0.06026	neg	5.9631	5.8367	6.5985	6.3613	6.0944	6.0321	4.6026	6.0622	5.7829	5.7377	5.6281	5.5083												Naphthopyranones	C14H12O6	-	Organoheterocyclic compounds	-
neg_7944	metab_20444	PE(16:1(9Z)/16:0)	C37H72NO8P	LMGP02010520;HMDB0008956	7.40132	670.484	1.62927	0.882067	0.002479	0.007462	neg	6.2077	6.8633	6.1716	6.4124	6.9352	6.8871	5.4864	5.7986	5.4426	6.2653	5.9629	5.868												Furanoisoflavonoids	C20H20O5	-	Phenylpropanoids and polyketides	-
neg_7957	metab_20457	PE(14:0/16:0)	C35H70NO8P	LMGP02010302;HMDB0008824	7.37065	644.468	1.45163	0.89015	0.007113	0.01636	neg	5.6166	6.2621	5.9237	5.7539	6.2121	6.1743	4.7202	5.7281	5.0982	5.6921	5.4266	5.3268												Carbohydrates and carbohydrate conjugates	C20H26O10	-	Organic oxygen compounds	-
neg_7962	metab_20462	PE(15:0/18:2(9Z,12Z))	C38H72NO8P	HMDB0008895;LMGP02011232	7.34763	700.494	1.40795	0.89583	0.005694	0.01382	neg	5.5084	5.5617	6.1678	6.179	5.9248	5.9078	4.6314	5.4813	5.3164	5.4188	5.406	5.3228												Indolines	C13H18N2O	-	Organoheterocyclic compounds	-
neg_8096	metab_20596	Manglupenone	C30H44O2	HMDB0030395	7.10892	473.284	1.03745	0.952119	0.0008284	0.003383	neg	5.7696	5.7661	5.9989	5.8857	5.7652	5.778	5.5192	5.5624	5.6354	5.3467	5.6077	5.6193												Fatty acyl glycosides	C14H26O8	-	Lipids and lipid-like molecules	-
neg_8276	metab_20776	Ximenic acid	C26H50O2	HMDB0035215;LMFA01030095	6.83805	439.38	1.05475	0.929769	0.007164	0.01645	neg	4.8764	4.7404	5.2536	5.1403	5.0222	5.0394	4.6234	4.9903	4.4445	4.6099	4.6584	4.6337												Terpene lactones	C21H28O9	-	Lipids and lipid-like molecules	-
neg_8313	metab_20813	Squamosinin A	C36H62O8	HMDB0041429	6.77683	667.448	1.3421	0.900347	0.009465	0.02045	neg	5.4629	5.2505	5.8451	5.4962	5.4469	5.3151	4.289	5.2403	5.0011	4.8462	5.1534	5.0143												Not Available	C8H15NO	-	Organoheterocyclic compounds	-
neg_8364	metab_20864	7,9-Pentacosanedione	C25H48O2	HMDB0035556	6.75387	425.365	1.14848	0.922445	0.008144	0.01822	neg	4.7096	4.8858	4.9998	5.1127	5.1164	5.1139	4.7019	4.7651	4.4527	4.209	4.7985	4.6902												Tricarboxylic acids and derivatives	C14H22O7	-	Organic acids and derivatives	-
neg_8465	metab_20965	N-Palmitoyl phenylalanine	C25H41NO3	HMDB0062339;LMFA08020091	6.64648	402.302	1.3374	0.891396	0.001725	0.005702	neg	4.3098	4.5241	4.2526	4.7153	4.711	4.6137	4.2745	3.7443	3.9655	3.8775	4.1769	4.1435												Carbohydrates and carbohydrate conjugates	C16H20N2O8	-	Organic oxygen compounds	-
neg_8742	metab_21242	N-Carbamoyl glucuronide lorcaserin	C21H28ClNO5	HMDB0061159	6.37917	454.167	1.33759	1.15568	0.01965	0.03685	neg	4.5557	4.6338	3.5492	3.6087	4.1684	4.3418	5.1598	4.7009	4.648	4.3377	4.9256	4.9568												Carbonyl compounds	C11H21O7P	-	Organic oxygen compounds	-
neg_8745	metab_21245	Sterebin G	C20H34O5	HMDB0035380	6.37917	335.221	1.12356	1.08454	0.0246	0.04422	neg	5.8776	5.93	5.095	5.1245	5.6134	5.5747	6.2742	5.9593	5.9037	5.6669	6.121	6.0972												Fatty acids and conjugates	C16H26O4	-	Lipids and lipid-like molecules	-
neg_8764	metab_21264	LysoPE(16:1(9Z)/0:0)	C21H42NO7P	HMDB0011504	6.37162	450.264	1.17063	0.920299	0.04202	0.06909	neg	6.7643	7.1366	5.9445	6.3687	6.9743	7.0138	6.2839	5.872	5.8622	6.6799	6.1639	6.1356												Fatty acids and conjugates	C8H14O5	-	Lipids and lipid-like molecules	-
neg_8831	metab_21331	PGA3	C20H28O4	LMFA03010140	6.31837	331.192	1.24499	1.09901	0.00105	0.004002	neg	4.235	4.2524	4.0122	3.8441	4.253	4.2512	4.6942	4.4478	4.6491	4.5521	4.4885	4.4714												Carbonyl compounds	C9H10O3	-	Organic oxygen compounds	-
neg_8874	metab_21374	5-formyl-6-hydroxy-1,1,4a,6-tetramethyl-decahydronaphthalen-2-yl acetate	C17H28O4	HMDB0134775	6.29555	317.174	1.13629	1.09317	0.008756	0.01927	neg	4.6794	4.3491	4.5366	4.0428	4.5154	4.602	5.0085	5.1875	4.7572	4.5694	4.8473	4.8436												Terpene glycosides	C25H32O13	-	Lipids and lipid-like molecules	-
neg_8991	metab_21491	Neopetasitenine	C21H29NO8	HMDB0030329	6.20348	458.162	1.09605	1.06761	0.002331	0.00713	neg	4.921	4.9093	4.8354	5.0726	5.0181	5.0661	5.5289	5.316	5.4352	5.0731	5.2709	5.2094												Indolyl carboxylic acids and derivatives	C12H13NO3	-	Organoheterocyclic compounds	-
neg_9023	metab_21523	N-Acetyl-9-O-lactoylneuraminic acid	C14H23NO11	HMDB0000768	6.18017	402.099	1.36269	1.0949	2.337e-05	0.0005852	neg	4.7792	4.56	4.6788	4.6174	4.8265	4.7955	4.9863	5.2162	5.2835	5.1935	5.134	5.1254												Amino acids, peptides, and analogues	C8H13NO5	-	Organic acids and derivatives	-
neg_9030	metab_21530	()13-HpODE	C18H32O4	-	6.18017	311.224	1.043	1.04459	0.002322	0.00711	neg	6.787	6.8666	6.5928	6.7681	6.9415	6.9455	7.1836	6.8838	7.204	7.2383	7.1142	7.1039												Amino acids, peptides, and analogues	C12H18N2O5	-	Organic acids and derivatives	C08280
neg_9042	metab_21542	Dehydroisoandrosterone sulfate	C19H28O5S	-	6.17253	413.164	1.3758	1.09565	0.0002216	0.001463	neg	5.0474	5.0027	4.8837	5.0309	5.1884	5.2065	5.7892	5.4727	5.6886	5.3491	5.5039	5.4615												Flavonoid glycosides	C26H28O14	-	Phenylpropanoids and polyketides	-
neg_9212	metab_21712	19-Hydroxyandrost-4-ene-3,17-dione	C19H26O3	LMST02020067;HMDB0003955	6.08865	347.187	1.33463	1.08544	1.919e-05	0.0005576	neg	5.1157	5.1087	4.9145	4.9936	5.1408	5.1364	5.5459	5.3425	5.6545	5.5187	5.4527	5.4891												Amino acids, peptides, and analogues	C8H14N2O6	-	Organic acids and derivatives	-
neg_9217	metab_21717	4-Hydroxypropofol	C12H18O2	HMDB0014018	6.08865	239.129	1.20973	1.07364	3.428e-05	0.0006454	neg	4.7618	4.6997	4.6849	4.6425	4.7596	4.8075	5.1496	4.9365	5.1378	5.1663	5.0153	5.0392												Not Available	C10H14O2S2	-	Organoheterocyclic compounds	-
neg_9271	metab_21771	2-Carboxy-4-dodecanolide	C13H22O4	HMDB0030987	6.06585	223.134	1.14878	1.06126	4.989e-05	0.0007448	neg	5.1583	5.1127	5.0709	5.0862	5.1538	5.1717	5.3855	5.3903	5.6016	5.4462	5.3957	5.4226												Oxazolidines	C6H9NO3	-	Organoheterocyclic compounds	-
neg_9273	metab_21773	FA(12:1(OH1))	C12H22O3	-	6.06585	213.15	1.12421	1.07795	0.0009836	0.003823	neg	4.0298	4.0891	3.9786	3.9984	4.0662	4.0032	4.3805	4.1564	4.4204	4.5129	4.2724	4.3104												Phenylacetic acids	C9H10O5	-	Benzenoids	-
neg_9283	metab_21783	13,14-dihydro-19(R)-hydroxyPGE1	C20H36O6	-	6.05817	371.245	1.35975	1.07814	1.535e-05	0.0005379	neg	5.757	5.6767	5.5469	5.628	5.7627	5.7996	6.2211	5.9766	6.2639	6.1703	6.0976	6.1124												Amino acids, peptides, and analogues	C12H17N3O4	-	Organic acids and derivatives	-
neg_9286	metab_21786	Ipomeatetrahydrofuran	C15H28O3	HMDB0040904	6.05817	301.203	1.07623	1.04773	0.0004306	0.002196	neg	6.3115	6.3103	6.045	6.2598	6.3231	6.337	6.623	6.498	6.6808	6.5373	6.5087	6.5274												Glycosylglycerols	C11H19NO8	-	Lipids and lipid-like molecules	-
neg_9295	metab_21795	10,11-dihydro-20-trihydroxy-leukotriene B4	C20H34O7	LMFA03020044;HMDB0012503	6.0505	385.224	1.16332	1.06391	0.0003755	0.002028	neg	5.4759	5.4083	5.2221	5.3301	5.5214	5.5255	5.8273	5.5999	5.879	5.8432	5.7062	5.7034												Carbohydrates and carbohydrate conjugates	C18H32O16	-	Organic oxygen compounds	C00492
neg_9352	metab_21852	3-Oxododecanoic acid	C12H22O3	HMDB0010727	6.02757	259.155	1.04574	1.06752	0.008032	0.01802	neg	4.7734	4.707	4.5354	4.9594	4.8186	4.8173	4.8925	4.9042	5.2293	5.3786	5.0667	5.0756												Purine 2'-deoxyribonucleosides	C10H12N4O4	-	Nucleosides, nucleotides, and analogues	C05512
neg_9439	metab_21939	Pipermethystine	C16H17NO4	HMDB0033486	5.98925	268.099	1.42354	1.25295	0.01584	0.03093	neg	2.3223	2.973	2.4526	2.908	3.1754	2.9385	3.744	3.0898	4.0867	2.7754	3.6667	3.6487												Amino acids, peptides, and analogues	C7H13NO3	-	Organic acids and derivatives	C08269
neg_9458	metab_21958	Pregnanediol-3-glucuronide	C27H44O8	HMDB0010318;LMST05010049	5.97377	477.288	1.48999	1.12036	0.0001425	0.001157	neg	4.5659	4.7248	4.384	4.3671	4.7276	4.6978	5.2408	5.0691	5.2139	5.0307	5.09	5.1266												Carbohydrates and carbohydrate conjugates	C12H23NO9	-	Organic oxygen compounds	-
neg_9468	metab_21968	Mukonal	C13H9NO2	HMDB0030216	5.97377	256.062	1.27658	1.14578	0.01952	0.03666	neg	3.5839	3.6071	3.8627	3.5291	3.7286	3.7098	3.9387	3.9959	4.9367	3.8521	4.2612	4.2478												Carbohydrates and carbohydrate conjugates	C12H14O7	-	Organic oxygen compounds	-
neg_9498	metab_21998	APC	C33H38N4O8	HMDB0060661	5.9504	617.264	1.38291	1.11949	0.01087	0.02281	neg	5.2609	4.5989	4.1974	4.5248	4.9057	4.8306	5.1915	5.1549	5.2842	5.5582	5.2721	5.242												Amino acids, peptides, and analogues	C11H17N5O4	-	Organic acids and derivatives	-
neg_9548	metab_22048	Oxyacanthine	C37H40N2O6	HMDB0030172	5.91913	589.269	1.5339	1.12079	0.001053	0.004009	neg	5.2053	4.8873	4.6073	4.7074	5.1074	5.0386	5.5944	5.4719	5.6226	5.5058	5.4871	5.4426												Gamma-keto acids and derivatives	C6H8O5	-	Organic acids and derivatives	-
neg_9649	metab_22149	Phenethylamine glucuronide	C14H19NO6	HMDB0010323	5.85752	278.104	2.01153	1.28654	0.0002047	0.001408	neg	3.7604	3.8298	3.1072	3.4113	3.8639	3.9503	5.2065	4.3698	4.9329	4.4797	4.622	4.5924												Carbohydrates and carbohydrate conjugates	C10H14O9	-	Organic oxygen compounds	-
neg_9650	metab_22150	N-[1-(4-methoxy-6-oxopyran-2-yl)-2-methylbutyl]acetamide	C13H19NO4	-	5.85752	234.114	2.47905	1.57196	0.0001366	0.001134	neg	2.9601	2.332	2.268	2.1791	3.0815	3.3126	4.7563	3.861	4.4399	3.9734	4.1972	4.1316												Dicarboxylic acids and derivatives	C8H12O5	-	Organic acids and derivatives	-
neg_9685	metab_22185	Avenanthramide 1f	C17H15NO5	HMDB0029283	5.82523	312.089	2.2246	1.5208	0.0003961	0.002091	neg	2.3459	1.9827	2.4157	1.9704	2.9452	3.0511	4.3992	3.4543	3.8484	3.4775	3.6432	3.5507												(3'->5')-dinucleotides	C20H26N10O14P2	-	Nucleosides, nucleotides, and analogues	-
neg_9715	metab_22215	Ganoderic acid theta	C30H42O8	HMDB0036310	5.80963	575.29	1.11106	1.08612	0.0164	0.03178	neg	5.0782	5.1403	4.4971	4.6548	4.88	4.803	5.2562	4.8077	5.5609	5.4095	5.3246	5.1944												Not Available	C7H7NO2	-	Organoheterocyclic compounds	-
neg_9720	metab_22220	Melanettin	C16H12O5	HMDB0041758	5.80963	319.039	1.15694	1.06864	0.002383	0.007237	neg	5.4888	5.3427	4.9951	5.2837	5.1952	5.1625	5.5733	5.6811	5.6314	5.6087	5.625	5.5086												Purines and purine derivatives	C5H4N4O3	-	Organoheterocyclic compounds	C00366
neg_9736	metab_22236	Nobiletin	C21H22O8	LMPK12111468;HMDB0029540	5.79383	437.101	1.08322	1.11567	0.0343	0.05835	neg	4.4	4.0112	3.936	3.9086	4.041	3.9781	4.3943	3.9681	4.7292	4.1897	5.0197	4.7819												Pyrimidine nucleotide sugars	C16H26N2O15P2	-	Nucleosides, nucleotides, and analogues	C03319
neg_9743	metab_22243	S-Glutaryldihydrolipoamide	C13H23NO4S2	HMDB0006832	5.7858	366.106	1.78439	1.21049	0.003492	0.009579	neg	4.272	4.9943	3.9613	3.9894	4.8803	4.8959	5.7827	4.9584	5.8319	5.107	5.4472	5.5511												Not Available	C6H10O5	-	Organoheterocyclic compounds	-
neg_9767	metab_22267	2-[4-(3-Hydroxypropyl)-2-methoxyphenoxy]-1,3-propanediol 1-glucoside	C19H30O10	HMDB0040353	5.76075	463.178	1.31204	1.09317	0.001118	0.004184	neg	4.5974	4.7233	5.1566	4.8675	4.9578	4.9338	5.4282	5.3633	5.1019	5.4472	5.314	5.3088												Carbohydrates and carbohydrate conjugates	C5H11O8P	-	Organic oxygen compounds	C00620
neg_9770	metab_22270	Glycyrol	C21H18O6	HMDB0033882;LMPK12090044	5.76075	347.09	1.4009	1.11262	6.279e-05	0.0008127	neg	4.3688	4.2608	4.0895	4.1231	4.3955	4.3869	4.8204	4.6366	4.8857	4.7088	4.739	4.7241
neg_9789	metab_22289	Fluorometholone	C22H29FO4	HMDB0014469	5.73672	421.204	1.20533	1.08576	0.0003072	0.001791	neg	4.0195	4.202	4.1423	4.3241	4.3345	4.3018	4.6577	4.5159	4.6583	4.5369	4.5731	4.5572
neg_9791	metab_22291	Artabsinolide D	C15H22O5	HMDB0034941	5.73672	263.13	1.53374	1.16065	8.921e-05	0.0009394	neg	3.7129	3.7349	3.5606	3.5415	3.8607	3.851	4.4967	4.0573	4.5004	4.164	4.2966	4.3182
neg_9818	metab_22318	Dehydrovomifoliol	C13H18O3	LMPR0103050009;HMDB0036819	5.69692	267.124	1.17147	1.07762	9.217e-05	0.0009579	neg	4.4363	4.4666	4.2621	4.3352	4.5203	4.4935	4.7933	4.6242	4.8892	4.7853	4.7377	4.7417
neg_9835	metab_22335	MG(0:0/14:1(9Z)/0:0)	C17H32O4	HMDB0011531	5.66362	345.229	1.53861	1.09779	3.224e-06	0.0003989	neg	5.5062	5.7668	5.6112	5.5755	5.7319	5.7405	6.288	6.1158	6.2173	6.3619	6.12	6.1447
neg_9872	metab_22372	Vulgarolide	C15H20O5	HMDB0041003	5.60707	605.264	1.54333	1.18688	0.02557	0.0456	neg	4.0759	5.2185	4.9093	3.5697	5.0843	5.0436	5.9179	5.3321	5.8207	4.7862	5.6454	5.6142
neg_9875	metab_22375	2-nonenoylglycine	C11H19NO3	HMDB0094807	5.60707	212.129	1.48125	1.16351	0.0004915	0.002404	neg	3.5278	3.457	3.2419	3.2844	3.5235	3.5904	4.0562	3.6266	4.0802	4.2755	3.9769	3.9806
neg_9930	metab_22430	Salicyluric acid	C9H9NO4	HMDB0000840	5.55228	194.046	1.1753	1.08894	2.91e-05	0.0006189	neg	3.6315	3.765	3.8472	3.7064	3.7497	3.7654	4.0462	4.0304	4.2348	4.1125	4.0114	4.0267
neg_9974	metab_22474	Piperettine	C19H21NO3	HMDB0034371	5.46415	621.295	1.5436	1.15204	0.00565	0.01374	neg	4.8125	4.8307	4.0412	4.0374	4.7841	4.7628	5.3728	4.8915	5.2007	5.5216	5.2322	5.1975
neg_9985	metab_22485	4-(3-hydroxybutyl)-2-methoxyphenol	C11H16O3	HMDB0135672	5.46415	241.109	1.44981	1.12683	5.07e-05	0.0007465	neg	3.9853	3.9642	3.8244	3.895	4.0476	4.0327	4.4152	4.278	4.6339	4.616	4.4088	4.4103
neg_10030	metab_22530	Cotinine glucuronide	C16H20N2O7	HMDB0001013	5.37555	333.11	1.57522	1.12489	1.555e-06	0.0003775	neg	4.6644	4.7275	4.5239	4.5383	4.7516	4.7552	5.3203	5.0974	5.3368	5.2961	5.1987	5.1998
neg_10061	metab_22561	3,4-Methyleneazelaic acid	C11H16O4	HMDB0059744	5.32677	211.098	1.17217	1.08648	4.896e-05	0.0007389	neg	3.9306	3.9057	3.8251	3.8212	4.0123	4.0236	4.3456	4.1705	4.3854	4.2087	4.2238	4.2182
neg_10077	metab_22577	Carissanol	C20H24O7	HMDB0030081	5.29427	375.146	1.63467	1.15551	8.852e-06	0.0004787	neg	3.9054	3.9949	3.9376	4.1574	4.1646	4.2262	4.8045	4.8941	4.5745	4.7031	4.599	4.6027
neg_10093	metab_22593	Alanyl-Asparagine	C7H13N3O4	HMDB0028682	5.27817	405.172	1.19939	1.07589	0.001348	0.004777	neg	5.0066	5.0085	4.8869	5.0852	5.2606	5.2677	5.4276	5.2269	5.6401	5.6285	5.4303	5.4807
neg_10099	metab_22599	Fludrocortisone	C21H29FO5	LMST02030103;HMDB0014825	5.27017	361.182	1.55921	1.20208	0.005909	0.01422	neg	3.0146	3.3028	3.1634	3.3838	3.94	3.9487	4.085	3.7293	4.3975	4.4218	4.154	4.1623
neg_10129	metab_22629	Physagulin F	C30H40O9	HMDB0039631	5.21323	589.269	1.32523	1.08014	7.014e-05	0.0008481	neg	5.6398	5.5347	5.4302	5.3597	5.6389	5.6355	6.1162	6.0038	6.0914	5.7972	5.9476	5.9483
neg_10151	metab_22651	Alectrol	C19H22O6	HMDB0041372	5.1827	327.125	1.49998	0.860163	0.002321	0.00711	neg	4.2249	4.1658	3.8793	4.2474	4.1977	4.2569	3.3447	3.7232	3.3428	3.3047	3.916	3.8487
neg_10164	metab_22664	8-Deoxy-11,13-dihydroxygrosheimin	C15H20O5	HMDB0041144	5.17523	605.263	2.31296	1.39791	0.000508	0.002452	neg	4.1887	3.5409	2.9188	2.9101	3.7131	3.9733	5.2719	4.8923	5.2155	4.4114	4.9147	4.9917
neg_10315	metab_22815	3,4,5-trihydroxy-6-[(3-oxo-1,7-diphenylheptan-4-yl)oxy]oxane-2-carboxylic acid	C25H30O8	HMDB0134659	5.0202	479.172	1.23199	1.08981	0.04857	0.07806	neg	5.0666	6.4459	6.3512	5.9106	6.2621	6.2406	6.7075	6.582	6.5029	6.5924	6.57	6.5763
neg_10321	metab_22821	Sebacic acid	C10H18O4	LMFA01170006;HMDB0000792	5.0202	201.113	1.19002	1.073	0.0002887	0.001721	neg	4.8496	4.8417	4.7425	4.729	4.8658	4.9051	5.2101	4.9785	5.3045	5.2915	5.1226	5.1341
neg_10442	metab_22942	Blumealactone C	C17H24O6	HMDB0035357	4.89018	345.135	1.6757	1.16404	6.084e-07	0.0003613	neg	3.8483	3.9582	3.8472	4.0093	4.0111	3.9519	4.7711	4.5418	4.6204	4.5822	4.4764	4.512
neg_10455	metab_22955	Sandoricin	C31H40O11	HMDB0037555	4.86668	633.259	1.46721	1.20935	0.03779	0.06325	neg	4.4943	2.9736	2.8651	3.8761	3.9259	3.8182	3.7868	4.0303	4.6112	5.0815	4.472	4.5664
neg_10459	metab_22959	11,12,13-Trinor-1(10)-spirovetivene-2,7-dione	C12H16O2	HMDB0036734	4.86668	237.114	1.22346	1.1324	0.01204	0.02479	neg	3.2895	3.236	3.2497	3.7732	3.5193	3.5974	3.7279	3.5782	3.8636	4.4113	3.8429	3.975
neg_10486	metab_22986	L-cis-Cyclo(aspartylphenylalanyl)	C13H14N2O4	HMDB0031360	4.835	307.096	1.23381	1.08593	3.157e-05	0.0006358	neg	4.3321	4.1995	4.1124	4.1545	4.311	4.3049	4.7066	4.5883	4.6	4.5746	4.5693	4.562
neg_10598	metab_23098	Methyl caprylate	C9H18O2	HMDB0031291	4.69242	203.129	1.04946	1.07769	0.0008407	0.003422	neg	3.6224	3.6086	3.5732	3.5935	3.6271	3.524	3.8284	3.7064	4.0188	3.9504	3.8455	3.8701
neg_10673	metab_23173	3,4-Dihydro-8-hydroxy-3-(3-hydroxy-4-methoxyphenyl)-1H-2-benzopyran-1-one	C16H14O5	HMDB0030807	4.60712	331.082	1.30088	1.15594	0.01996	0.03731	neg	3.7846	3.5938	2.7133	3.6168	3.7046	3.2898	4.1259	3.8268	4.0913	4.0187	4.002	3.8606
neg_10710	metab_23210	3-Hydroxytetradecanedioic acid	C14H26O5	HMDB0000394	4.5686	319.177	1.41536	1.09604	4.92e-05	0.0007409	neg	4.9452	4.9576	4.7736	4.7879	5.0314	5.057	5.3594	5.3802	5.4662	5.4708	5.354	5.3582
neg_10724	metab_23224	5-Pentyltetrahydro-2-oxo-3-furancarboxylic acid	C10H16O4	HMDB0030989	4.5531	245.103	1.4752	1.12758	5.649e-05	0.0007809	neg	4.1047	4.1093	3.9559	4.0627	4.2266	4.2324	4.7035	4.4017	4.7682	4.7977	4.565	4.6033
neg_10790	metab_23290	12-Oxo-20-trihydroxy-leukotriene B4	C20H30O7	HMDB0012553;LMFA03020050	4.45807	381.193	1.35154	1.10434	0.0004918	0.002404	neg	4.6886	4.8343	4.4564	4.4877	4.7839	4.8124	5.3147	4.8712	5.3405	5.1556	5.1546	5.1544
neg_10833	metab_23333	Senecioic acid	C5H8O2	HMDB0000509	4.40203	299.151	1.44922	1.14668	8.315e-05	0.0009164	neg	3.6133	3.6183	3.3401	3.4142	3.6834	3.644	4.1393	3.8617	4.2737	4.1435	3.9815	4.0398
neg_10851	metab_23351	Achillicin	C17H22O5	HMDB0036487	4.36997	343.095	1.63975	1.23925	0.008583	0.01896	neg	3.6054	3.1098	2.4015	2.9982	3.4207	3.5769	3.989	3.8006	4.0774	4.0049	3.8618	3.951
neg_10853	metab_23353	Imperatorin	C16H14O4	HMDB0034376	4.36997	269.083	1.37561	1.19976	0.03823	0.06385	neg	3.2553	3.1753	3.5158	2.3081	3.9275	3.8494	3.9786	4.1737	4.0255	3.697	4.0805	4.0817
neg_10899	metab_23399	Cis-3-Hexenyl lactate	C9H16O3	HMDB0036213	4.31398	217.108	1.35926	1.15758	0.002692	0.007916	neg	3.4134	3.4582	2.8222	3.3008	3.4773	3.4451	3.8487	3.6189	4.1959	3.8438	3.7869	3.7585
neg_10956	metab_23456	1-Hydroxypropan-2-yl 2-isopropyl-5-methylcyclohexyl carbonate	C14H26O4	HMDB0059947	4.21792	303.182	1.53632	1.13047	8.353e-05	0.0009177	neg	4.4028	4.4856	4.2864	4.3013	4.4819	4.485	4.9755	4.8315	5.305	4.9562	4.9083	4.9136
neg_10967	metab_23467	N-formylanthranilic acid	C8H7NO3	-	4.20177	164.035	1.16517	1.07978	0.0001108	0.001028	neg	4.1445	4.2535	4.1408	4.1061	4.0996	4.1482	4.5688	4.3283	4.5308	4.5834	4.4546	4.4123
neg_11004	metab_23504	15-deoxy-delta-12,14-PGJ2	C20H28O3	LMFA03010021	4.12913	315.194	2.17828	1.59021	0.00293	0.008403	neg	2.3792	2.6224	2.137	1.7457	2.6097	2.4724	4.8436	2.9346	3.5103	3.1038	3.9271	3.8943
neg_11098	metab_23598	3-(3,4-Dihydroxybenzyl)-7-hydroxy-5-methoxy-4-chromanone	C17H16O6	HMDB0033298	4.01145	361.095	1.21779	1.08653	0.008127	0.01818	neg	5.1397	5.11	4.501	5.1016	5.2085	5.1703	5.6353	5.3042	5.5976	5.4783	5.4486	5.3871
neg_11134	metab_23634	Cis-4-Hydroxycyclohexylacetic acid	C8H14O3	HMDB0000451	3.9555	157.086	1.03842	1.07788	0.007752	0.01752	neg	3.8873	3.824	3.7917	3.8498	3.8847	3.8716	4.1036	3.9866	4.4915	4.1538	4.0837	4.0901
neg_11148	metab_23648	3-Oxo-carbofuran	C12H13NO4	HMDB0032776	3.92357	234.078	1.39615	1.16107	0.000971	0.003793	neg	3.3934	3.3815	3.1149	3.053	3.3748	3.4978	4.2155	3.5478	3.8614	3.7832	3.7996	3.7999
neg_11183	metab_23683	Crocin 3	C32H44O14	HMDB0039121	3.84333	651.27	1.34052	1.1156	0.02241	0.04097	neg	5.2799	4.8721	4.3226	4.4441	5.243	5.2705	5.3093	5.717	5.4809	5.5706	5.3775	5.3781
neg_11184	metab_23684	16,17-Dihydro-16a,17-dihydroxygibberellin A7 17-glucoside	C25H34O12	HMDB0040649	3.84333	547.185	1.93608	1.29283	0.0002101	0.001425	neg	3.5071	3.4411	2.8992	3.1117	3.5573	3.4841	3.9165	4.1402	4.8635	4.1948	4.3536	4.3824
neg_11203	metab_23703	6-Hydroxy-2,6-dimethyl-2,7-octadien-4-one	C10H16O2	HMDB0034670	3.8194	213.113	1.22894	1.09161	0.0001091	0.001019	neg	4.0059	4.0146	3.9029	3.9737	4.0767	4.0594	4.4137	4.2259	4.5562	4.3877	4.323	4.3336
neg_11214	metab_23714	Alpha-dihydroartemisinin	C15H24O5	HMDB0060593	3.80343	283.156	1.09301	1.08113	0.001796	0.005871	neg	4.0894	4.0988	3.9173	4.0947	4.1425	4.1383	4.3838	4.1206	4.5519	4.4546	4.5019	4.4514
neg_11231	metab_23731	2,3-Dihydro-2,3-dihydroxy-9-phenyl-1H-phenalen-1-one	C19H14O3	HMDB0034688	3.7798	325.061	1.09857	1.08153	0.002183	0.006802	neg	4.3299	4.4425	4.1945	4.0339	4.3157	4.4394	4.8281	4.4162	4.7236	4.5873	4.6509	4.6517
neg_11232	metab_23732	Simulenoline	C20H23NO3	HMDB0031997	3.7798	306.147	1.87977	1.31213	0.001675	0.005574	neg	3.2333	3.3883	2.3598	2.5747	3.188	3.2687	3.946	4.135	3.6653	4.2191	3.855	3.8146
neg_11256	metab_23756	Gamma-Glutamyltryptophan	C16H19N3O5	HMDB0029160	3.76422	332.125	1.04565	1.0767	0.04382	0.0716	neg	5.1269	4.8479	4.6747	4.9002	4.9552	4.9823	5.0815	5.0554	5.0368	5.9431	5.3143	5.323
neg_11262	metab_23762	3,3-Dimethylglutaric acid	C7H12O4	HMDB0002441	3.76422	159.066	1.28857	1.07295	3.326e-05	0.0006454	neg	5.5174	5.5978	5.4217	5.4726	5.6514	5.6502	5.923	5.9497	6.161	5.9085	5.8973	5.9041
neg_11272	metab_23772	Vanillylamine	C8H11NO2	HMDB0012309	3.75647	152.071	1.26999	1.11318	0.0001023	0.0009981	neg	3.7535	3.7168	3.4795	3.5458	3.6756	3.7249	4.0742	3.9741	4.2849	3.9471	4.0571	4.0376
neg_11273	metab_23773	Biotripyrrin-a	C25H27N3O6	HMDB0003323	3.74867	510.19	1.18737	1.09231	0.004155	0.01091	neg	4.6951	4.4422	4.0777	4.3264	4.4411	4.473	4.6113	4.66	4.9746	5.068	4.7853	4.7987
neg_11294	metab_23794	Trans-2-trans-4-Heptadien-1-ol	C7H12O	HMDB0032301;LMFA05000701	3.70097	157.086	1.29909	1.09718	1.35e-06	0.0003704	neg	4.027	4.031	3.9821	4.0025	4.1205	4.1017	4.5036	4.3635	4.5438	4.4204	4.3966	4.3937
neg_11326	metab_23826	Methylisopelletierine	C9H17NO	HMDB0030326	3.65295	200.129	1.03372	1.1039	0.04553	0.07395	neg	3.9974	3.8715	3.3836	3.6855	3.8822	3.9302	4.4907	3.7772	3.8039	4.624	4.1955	4.2238
neg_11337	metab_23837	2-Aminomuconic acid	C6H7NO4	HMDB0001241	3.63697	202.036	1.19332	1.11351	0.0009419	0.003709	neg	3.5662	3.4386	3.6833	3.2984	3.5735	3.5315	4.0611	3.663	4.0358	3.7799	4.0233	3.9219
neg_11339	metab_23839	6-(4-ethenyl-3-hydroxyphenoxy)-3,4,5-trihydroxyoxane-2-carboxylic acid	C14H16O8	HMDB0126429	3.629	293.068	1.54042	1.17609	0.00253	0.007573	neg	3.7819	4.041	4.2403	3.2643	3.9073	3.7976	4.4376	4.1786	4.8639	4.5787	4.5308	4.5029
neg_11343	metab_23843	Cis-Resveratrol 3-sulfate	C14H12O6S	HMDB0041712	3.62097	353.035	1.7438	1.25078	0.002211	0.00687	neg	3.3764	3.5047	2.4914	3.4563	3.353	3.1479	4.0144	3.9045	4.1617	4.213	4.066	3.8219
neg_11401	metab_23901	Lactucin	C15H16O5	HMDB0035814	3.51693	257.083	1.03959	0.922106	0.005534	0.01352	neg	4.2395	4.1484	4.0208	4.0713	4.1545	4.0893	3.5066	4.0269	3.8158	3.9219	3.8254	3.7061
neg_11410	metab_23910	Methyl (3x,4E,10R)-3,10-dihydroxy-4,11-dodecadiene-6,8-diynoate 10-glucoside	C19H24O9	HMDB0040897	3.50093	377.126	1.16772	1.10879	0.01706	0.03287	neg	3.6225	4.2022	4.4716	3.718	4.0472	4.0378	4.4906	4.2278	4.6962	4.5264	4.3782	4.4039
neg_11448	metab_23948	Indole-3-carboxilic acid-O-sulphate	C9H7NO5S	HMDB0060002	3.4369	239.998	1.56766	1.1951	0.004993	0.01252	neg	3.5414	3.7195	3.6861	3.213	3.6085	3.5462	3.8663	3.7805	4.4869	4.8067	4.261	4.2668
neg_11454	metab_23954	Resorcinol	C6H6O2	-	3.42892	109.029	1.50636	1.1319	0.0004666	0.00232	neg	4.2073	4.2718	4.2085	4.1708	4.2481	4.2296	4.9722	4.4589	4.9125	4.7951	4.7648	4.7757
neg_11529	metab_24029	O-Demethylfonsecin	C14H12O6	HMDB0033649	3.32568	321.063	1.55887	1.20819	0.01644	0.03185	neg	4.0896	4.0925	2.6473	3.8169	3.9582	3.9622	4.5035	4.3295	4.8583	4.3488	4.6059	4.6157
neg_11623	metab_24123	Dolichin B	C20H20O5	HMDB0029468;LMPK12070015	3.18228	321.11	1.80559	1.23314	0.0003763	0.00203	neg	3.4247	3.7523	3.1119	3.3433	3.8004	3.8274	4.611	4.2096	4.4747	4.2761	4.3032	4.3411
neg_11689	metab_24189	6-(2-Carboxyethyl)-7-hydroxy-2,2-dimethyl-4-chromanone glucoside	C20H26O10	HMDB0034032	3.0463	407.136	1.42195	1.14688	0.0003387	0.001906	neg	3.376	3.1246	3.2493	3.4252	3.5715	3.5179	3.8576	3.9078	3.9947	3.7935	3.8425	3.8443
neg_11713	metab_24213	N-despropyl ropinirole	C13H18N2O	HMDB0060625	3.0146	255.089	1.77366	1.23448	0.001415	0.004942	neg	3.5268	3.6542	3.2829	3.3784	3.7083	3.7116	5.0011	3.9404	4.5484	4.3075	4.3063	4.1471
neg_11723	metab_24223	Butyl (S)-3-hydroxybutyrate glucoside	C14H26O8	HMDB0031694	2.99878	303.146	1.39746	1.11643	0.0001958	0.001381	neg	4.3069	4.4224	4.0406	4.1379	4.4155	4.3912	4.861	4.5789	4.9917	4.798	4.73	4.7502
neg_11734	metab_24234	Taraxinic acid glucosyl ester	C21H28O9	HMDB0035249	2.975	469.173	1.68997	1.2292	0.01405	0.02813	neg	3.9812	3.9966	3.7941	3.7694	4.1451	4.1095	4.5216	4.2955	5.8878	4.3345	5.0423	5.1687
neg_11750	metab_24250	(R)-Pelletierine	C8H15NO	HMDB0030324	2.935	186.113	1.6059	1.14065	0.0003415	0.001918	neg	4.5146	4.6651	4.3759	4.5283	4.7426	4.7337	5.4938	5.0077	5.0301	5.5509	5.1756	5.1737
neg_11906	metab_24406	Garcinia lactone dibutyl ester	C14H22O7	HMDB0040462	2.65477	301.13	1.43044	1.12221	3.245e-05	0.0006379	neg	4.168	4.1449	3.962	3.9348	4.1327	4.1564	4.7498	4.4327	4.7343	4.558	4.5077	4.5121
neg_11914	metab_24414	Trans-3-Hydroxycotinine glucuronide	C16H20N2O8	HMDB0001204	2.6388	349.105	1.45785	1.12529	0.0001205	0.001064	neg	4.313	4.3823	4.0357	4.1056	4.4228	4.4082	5.0164	4.653	4.8603	4.7739	4.7661	4.8125
neg_11920	metab_24420	DHAP(8:0)	C11H21O7P	HMDB0011685	2.6308	277.087	1.70712	1.19254	8.754e-05	0.0009336	neg	3.87	3.9985	3.4645	3.5195	3.8787	3.7992	4.7085	4.4201	4.5401	4.4099	4.4777	4.3112
neg_11951	metab_24451	(6E,8R,10Z)-8-hydroxy-3-oxohexadecadienoic acid	C16H26O4	HMDB0062365	2.57495	303.157	1.93658	1.47798	0.004216	0.01103	neg	2.3212	2.4084	2.2919	2.1237	2.4478	2.3044	3.3695	2.775	3.2467	2.9567	4.0885	4.1002
neg_11971	metab_24471	6-(2-Hydroxyethoxy)-6-oxohexanoic acid	C8H14O5	HMDB0061681	2.55097	189.077	1.39588	1.12327	4.228e-05	0.000701	neg	3.712	3.8433	3.9092	3.734	3.8734	3.8523	4.4481	4.1927	4.462	4.2143	4.2224	4.2144
neg_12041	metab_24541	Ethyl vanillin	C9H10O3	HMDB0029665	2.41593	211.061	1.00627	1.06919	0.0007049	0.003039	neg	3.9985	3.9119	3.7147	3.9392	3.9877	3.9496	4.3462	4.0877	4.1753	4.1813	4.2025	4.1332
neg_12044	metab_24544	Oleuroside	C25H32O13	HMDB0035352	2.40798	521.168	2.40703	1.43405	0.001299	0.004648	neg	3.959	3.9778	4.0974	2.726	2.7898	3.4214	5.2424	5.0792	5.1726	4.8097	4.8847	4.8812
neg_12364	metab_24864	N-Deschlorobenzoyl indomethacin	C12H13NO3	HMDB0013988	2.04032	218.082	1.76937	1.24282	0.0005363	0.002538	neg	3.3236	3.4831	3.0027	2.8219	3.5368	3.4731	4.1966	3.9409	4.2732	4.0076	3.992	4.001
neg_12365	metab_24865	N-acetyl-L-2-aminoadipate(2-)	C8H13NO5	HMDB0062715	2.04032	184.061	1.41235	1.10315	0.000852	0.003456	neg	5.0509	5.0205	4.8944	4.8635	5.0443	5.0259	5.2743	5.273	5.8084	5.5787	5.5185	5.5296
neg_12402	metab_24902	Hypoglycin B	C12H18N2O5	HMDB0029428	2.00035	269.115	1.41289	1.12826	8.899e-05	0.0009388	neg	3.9046	4.1603	3.8159	3.7512	4.0213	4.0191	4.4544	4.2915	4.5845	4.3998	4.4797	4.4974
neg_12426	metab_24926	Kaempferol 3-rhamnoside 4'-xyloside	C26H28O14	HMDB0039321	1.9765	545.131	1.71458	1.14726	0.0002874	0.001717	neg	5.0421	5.4352	4.9472	5.0952	5.502	5.5115	6.3358	5.8433	6.2794	5.7325	5.995	5.9936
neg_12428	metab_24928	Serylglutamic acid	C8H14N2O6	HMDB0029038	1.9765	279.086	1.6249	1.17605	0.0005755	0.002664	neg	3.7073	3.9584	3.3774	3.5725	3.953	3.9242	4.547	4.3234	4.4538	4.4452	4.3725	4.3101
neg_12442	metab_24942	PISCIDIC ACID	C11H12O7	-	1.96055	255.052	1.61012	1.22938	0.01503	0.02966	neg	3.7093	3.5935	2.4698	3.7921	3.9063	3.8454	4.0087	4.3702	4.0261	5.0869	4.3937	4.3234
neg_12708	metab_25208	3,3'-Dithiobis[4,5-dihydro-2-methylfuran]	C10H14O2S2	HMDB0039670	1.61888	505.081	2.30891	1.42825	1.785e-05	0.0005576	neg	3.2892	3.359	2.6271	2.8783	3.2292	3.1409	4.7793	3.8317	4.3982	4.4148	4.5121	4.5151
neg_12713	metab_25213	5-ethyl-5-methyl-2,4-oxazolidinedione	C6H9NO3	HMDB0061082	1.61888	188.056	1.81392	1.3408	0.007207	0.01653	neg	2.2476	3.3191	2.5669	2.0535	3.2535	3.1607	3.9028	3.4311	3.851	3.7309	3.6443	3.7
neg_12778	metab_25278	2-(2,5-dihydroxy-4-methoxyphenyl)acetic acid	C9H10O5	HMDB0130476	1.5161	197.046	1.03946	1.06444	0.0001064	0.001009	neg	4.2834	4.2757	4.0852	4.22	4.257	4.205	4.5875	4.3921	4.5879	4.4842	4.4647	4.4443
neg_12784	metab_25284	L-Agaritine	C12H17N3O4	HMDB0033758	1.5003	302.089	2.23503	1.44845	0.0001296	0.001102	neg	3.0509	2.8194	2.2903	2.3495	3.1666	3.1427	4.4672	4.275	3.8705	3.7606	4.0168	3.9723
neg_12786	metab_25286	(3R)-3,4-Dihydroxy-3-(hydroxymethyl)butanenitrile 4-glucoside	C11H19NO8	HMDB0034085	1.5003	274.094	1.46746	1.10811	0.0004002	0.002104	neg	4.9305	5.3705	4.89	4.9871	5.2534	5.2594	5.8489	5.4617	5.7123	5.7691	5.5989	5.6198
neg_12915	metab_25415	Raffinose	C18H32O16	HMDB0003213	1.20918	525.148	2.4928	1.44714	0.0002983	0.001756	neg	3.3889	3.4011	3.2926	3.352	3.4159	3.4143	5.4303	4.4121	5.3358	4.472	4.8269	4.8471
neg_12919	metab_25419	Deoxyinosine	C10H12N4O4	HMDB0000071	1.20918	251.079	1.93112	1.1498	1.917e-05	0.0005576	neg	6.1359	6.3063	5.7026	6.036	6.259	6.2514	7.3294	6.875	7.1182	6.848	7.0093	7.0073
neg_12920	metab_25420	4-Hydroxystachydrine	C7H13NO3	HMDB0029230	1.20918	204.088	1.8735	1.27684	0.000349	0.001941	neg	3.4657	3.741	2.8792	3.1532	3.4198	3.5216	3.78	4.5113	4.68	4.2136	4.2933	4.2886
neg_12938	metab_25438	2-O-alpha-D-Galactopyranosyl-1-deoxynojirimycin	C12H23NO9	HMDB0041337	1.17003	306.12	1.88483	1.39817	0.003629	0.009856	neg	2.3781	2.3903	2.2822	2.5484	2.405	2.4034	3.7237	2.4375	3.5627	3.5622	3.3452	3.5105
neg_12961	metab_25461	Phenylglucuronide	C12H14O7	HMDB0059806	1.13077	539.143	1.95972	1.22983	0.0004024	0.002112	neg	4.1733	4.5895	3.7629	3.9598	4.5751	4.5222	5.484	5.076	5.45	5.0863	5.1899	5.176
neg_13038	metab_25538	Histidinyl-Gamma-glutamate	C11H17N5O4	HMDB0028899	1.06123	304.104	1.25975	1.17243	0.04612	0.07474	neg	3.9337	3.9088	2.5449	3.2335	3.7168	3.2977	3.5778	3.9516	3.9675	4.5724	4.065	4.0587
neg_13067	metab_25567	2-Methyl-4-oxopentanedioic acid	C6H8O5	HMDB0039447	1.00538	205.035	1.2934	1.10751	0.0003165	0.001823	neg	3.8654	4.0252	3.7361	3.8532	4.014	4.0023	4.3074	4.3147	4.188	4.6224	4.2902	4.3012
neg_13355	metab_25855	D-Erythroascorbic acid 1'-a-D-xylopyranoside	C10H14O9	HMDB0033626	0.796283	277.057	1.14235	1.06259	0.0003578	0.001969	neg	5.2512	5.4239	5.192	5.1941	5.4424	5.418	5.527	5.7099	5.6196	5.7543	5.6512	5.6567
neg_13370	metab_25870	Tetrahydro-2,5-furan-diacetic acid	C8H12O5	HMDB0059767	0.796283	233.067	1.0979	0.937451	0.02054	0.03819	neg	6.3479	6.5983	5.9249	6.4651	6.3275	6.3205	5.5066	6.0736	5.6909	6.0653	6.1373	6.136
neg_13425	metab_25925	Guanosine diphosphate adenosine	C20H26N10O14P2	HMDB0001501	0.788733	691.106	1.27802	0.907275	0.03957	0.06576	neg	6.1378	6.0501	6.1206	6.3187	6.1507	6.1693	5.1716	5.4693	4.8953	6.2853	5.8418	5.8562
neg_13459	metab_25959	3-Pyridylacetic acid	C7H7NO2	HMDB0001538	0.788733	136.039	1.31721	1.09737	8.91e-05	0.0009391	neg	4.4654	4.5958	4.235	4.3866	4.5288	4.5293	5.0276	4.8162	4.9646	4.8266	4.8142	4.8949
neg_13539	metab_26039	Uric acid	C5H4N4O3	HMDB0000289	0.765933	167.02	1.21992	1.06514	0.0008206	0.003362	neg	5.9092	6.0934	5.7852	6.0122	6.037	5.9979	6.2455	6.3147	6.2209	6.6607	6.3764	6.3499
neg_13803	metab_26303	Deoxythymidine diphosphate-l-rhamnose	C16H26N2O15P2	HMDB0006354	0.658567	547.075	1.189	0.911481	0.013	0.02641	neg	4.8676	5.1701	4.9502	4.6083	4.7692	4.8474	4.3665	4.3229	4.9272	4.0693	4.5059	4.4378
neg_13868	metab_26368	D-1,5-Anhydrofructose	C6H10O5	HMDB0041561	0.643267	207.051	1.17511	1.07091	5.189e-05	0.0007503	neg	4.7523	4.9286	4.7429	4.6801	4.7826	4.7987	5.0863	5.1409	5.2815	5.1325	5.0351	5.0428
neg_13904	metab_26404	Ribose 1-phosphate	C5H11O8P	HMDB0001489	0.63565	229.012	1.11695	0.944931	0.005037	0.01261	neg	6.2297	6.4819	6.1921	6.357	6.2114	6.2265	5.5845	6.0521	6.0004	5.8476	6.0534	6.0816
